# Supplementary material for: The loss of heterochromatin is associated with multiscale three-dimensional genome reorganization and aberrant transcription during cellular senescence
Source: HighWire-hosted journal article supplement (doi:10.1101/gr.275235.121), 2021-06-17
Supplement: Supplemental_Table_S1.xlsx [file Supplemental_Table_S1.xlsx]

## Sheet: sequencing depth
Table S1: The sequencing depth of Hi-C data. The numbers of total raw reads and valid reads for each replicate were shown.
samples	description	Total reads	Valid Pairs
G1	growing rep1	178419015	111492796
G2	growing rep2	162444627	97607558
G_total	growing total	340863642	209100354
Q1	quiescence rep1	178843131	109954930
Q2	quiescence rep2	177807218	108466192
Q_total	quiescent total	356650349	218421122
S1	senescnece rep1	145797590	89340136
S2	senescnece rep2	177613913	105415948
S_total	senescnece total	323411503	194756084
DS1	deep senescnece rep1	160666046	95997018
DS2	deep senescnece rep2	175281382	102569611
DS_total	deep senescnece rep3	335947428	198566629
total		1356872922	820844189
