# Supplementary material for: The loss of heterochromatin is associated with multiscale three-dimensional genome reorganization and aberrant transcription during cellular senescence
Source: HighWire-hosted journal article supplement (doi:10.1101/gr.275235.121), 2021-06-17
Supplement: Supplemental_Table_S2.xlsx [file Supplemental_Table_S2.xlsx]

## Sheet: Sheet1
Table S2: Enriched terms of differentially expressed genes (S vs. G and DS vs. G) by DAVID. The FDR was given.
Terms	FDR of S vs.G	FDR of DS vs. G	Gene types
secreted	3.08e-08	3.2e-14	Upregulated
hsa04064:NF-kappa B signaling pathway	0.012	0.000244	Upregulated
Lysosome	4.89e-13	0.000439	Upregulated
GO:0007568~aging	0.081	0.02	Upregulated
hsa04115: p53 signaling pathway	0.000408	0.013	Upregulated
hsa04668:TNF signaling pathway	0.012	7.57e-07	Upregulated
Actin-binding	3.81e-17	1.02e-11	Downregulated
hsa05200:Pathways in cancer	1.78e-05	6.98e-07	Downregulated
hsa04390:Hippo signaling pathway	0.003	2.88e-05	Downregulated
Cell cycle	0.001	0.043	Downregulated
