# Supplementary material for: The loss of heterochromatin is associated with multiscale three-dimensional genome reorganization and aberrant transcription during cellular senescence
Source: HighWire-hosted journal article supplement (doi:10.1101/gr.275235.121), 2021-06-17
Supplement: Supplemental_Table_S3.xlsx [file Supplemental_Table_S3.xlsx]

## Sheet: compartment category
Table S3: The list of bins of different A/B compartment categories. Compartment scores for each cell state were given.
label	chrom	start	end	Q	G	S	DS
shared A	1	1	40000	0.272152	0.3123	0.278755	0.333822
shared A	1	40001	80000	0.284364	0.31188	0.300617	0.342603
shared A	1	80001	120000	0.279551	0.208966	0.276952	0.341682
shared A	1	120001	160000	0.227601	0.143881	0.275412	0.300195
shared A	1	160001	200000	0.211225	0.151911	0.243431	0.268472
shared B	1	520001	560000	-0.279386	-0.305528	0.164598	0.376535
shared A	1	720001	760000	0.513384	0.328162	0.749775	0.780391
shared A	1	760001	800000	0.735204	0.592795	0.908511	0.88668
shared A	1	800001	840000	0.954265	0.808106	1.0411	1.00473
shared A	1	840001	880000	1.06874	0.958339	1.10484	1.06867
shared A	1	880001	920000	1.16489	1.0976	1.161	1.12576
shared A	1	920001	960000	1.21922	1.16676	1.18264	1.13434
shared A	1	960001	1000000	1.2525	1.21881	1.20736	1.19808
shared A	1	1000001	1040000	1.25085	1.23092	1.21816	1.20946
shared A	1	1040001	1080000	1.25136	1.25464	1.23311	1.27219
shared A	1	1080001	1120000	1.23917	1.26056	1.19713	1.23359
shared A	1	1120001	1160000	1.25903	1.26592	1.20146	1.23682
shared A	1	1160001	1200000	1.25257	1.27666	1.19858	1.20795
shared A	1	1200001	1240000	1.24961	1.2896	1.21014	1.21987
shared A	1	1240001	1280000	1.24877	1.28161	1.19787	1.2128
shared A	1	1280001	1320000	1.24257	1.29289	1.20235	1.22145
shared A	1	1320001	1360000	1.25933	1.29091	1.18713	1.24471
shared A	1	1360001	1400000	1.266	1.31515	1.22944	1.2611
shared A	1	1400001	1440000	1.26654	1.31131	1.24221	1.29283
shared A	1	1440001	1480000	1.27666	1.31194	1.25899	1.31818
shared A	1	1480001	1520000	1.28853	1.29437	1.26237	1.32684
shared A	1	1520001	1560000	1.28579	1.30133	1.25502	1.34603
shared A	1	1560001	1600000	1.28255	1.31179	1.26884	1.37264
shared A	1	1600001	1640000	1.27359	1.31434	1.25241	1.34726
shared A	1	1640001	1680000	1.2712	1.29772	1.23722	1.34626
shared A	1	1680001	1720000	1.27648	1.29322	1.23012	1.36202
shared A	1	1720001	1760000	1.25879	1.2609	1.23009	1.37346
shared A	1	1760001	1800000	1.22124	1.20619	1.21179	1.36427
shared A	1	1800001	1840000	1.19077	1.12596	1.1781	1.32609
shared A	1	1840001	1880000	1.1343	1.02572	1.13769	1.28789
shared A	1	1880001	1920000	1.06356	0.89537	1.11638	1.25078
shared A	1	1920001	1960000	0.956617	0.781122	1.05854	1.21509
shared A	1	1960001	2000000	0.863149	0.65044	1.03144	1.14685
shared A	1	2000001	2040000	0.834788	0.670865	0.994614	1.15655
shared A	1	2040001	2080000	0.828183	0.668556	0.977798	1.16273
shared A	1	2080001	2120000	0.824577	0.672687	0.972082	1.11094
shared A	1	2120001	2160000	0.80357	0.698116	0.914226	1.06144
shared A	1	2160001	2200000	0.791079	0.717328	0.863512	0.968657
shared A	1	2200001	2240000	0.721881	0.675703	0.735465	0.84929
shared A	1	2240001	2280000	0.62172	0.570569	0.580614	0.752056
shared A	1	2280001	2320000	0.529994	0.469729	0.463775	0.70137
shared A	1	2320001	2360000	0.398603	0.385014	0.326263	0.607071
shared A	1	2360001	2400000	0.208837	0.224266	0.176392	0.49079
shared B	1	2440001	2480000	-0.414992	-0.359177	-0.213391	0.150442
shared B	1	2480001	2520000	-0.67826	-0.600014	-0.314142	-0.00652949
shared B	1	2520001	2560000	-0.734275	-0.632205	-0.328557	-0.0830849
shared B	1	2560001	2600000	-0.945691	-0.8263	-0.46492	-0.247517
shared B	1	2600001	2640000	-1.07657	-0.989618	-0.644937	-0.401895
shared B	1	2680001	2720000	-1.19024	-1.10601	-0.769679	-0.485799
B-A	1	2720001	2760000	-1.19557	-1.14702	-0.812864	-0.434562
shared B	1	2760001	2800000	-1.17389	-1.15039	-0.912259	-0.434293
shared B	1	2800001	2840000	-1.18374	-1.16294	-0.928725	-0.454568
shared B	1	2840001	2880000	-1.17205	-1.14464	-0.88095	-0.423791
B-A	1	2880001	2920000	-1.17413	-1.12099	-0.793155	-0.370712
B-A	1	2920001	2960000	-1.16843	-1.10121	-0.797966	-0.36582
B-A	1	2960001	3000000	-1.16757	-1.09708	-0.772511	-0.369215
B-A	1	3000001	3040000	-1.15251	-1.06532	-0.765942	-0.367203
shared B	1	3040001	3080000	-1.11982	-1.05307	-0.733777	-0.384561
B-A	1	3080001	3120000	-1.08433	-1.01691	-0.726868	-0.311511
shared B	1	3120001	3160000	-1.04485	-1.01851	-0.696536	-0.297885
shared B	1	3160001	3200000	-0.945946	-0.964738	-0.644435	-0.269385
shared B	1	3200001	3240000	-0.821871	-0.868947	-0.563407	-0.213321
shared B	1	3240001	3280000	-0.611424	-0.671492	-0.417728	-0.0874471
shared B	1	3280001	3320000	-0.316579	-0.367815	-0.2287	0.0298144
shared A	1	3400001	3440000	0.368057	0.446967	0.402224	0.52928
shared A	1	3440001	3480000	0.497808	0.572259	0.503807	0.604395
shared A	1	3480001	3520000	0.55822	0.659708	0.561801	0.689595
shared A	1	3520001	3560000	0.540363	0.630361	0.630185	0.668523
shared A	1	3560001	3600000	0.487816	0.567497	0.627968	0.683126
shared A	1	3600001	3640000	0.407439	0.444069	0.510098	0.605749
shared A	1	3640001	3680000	0.298259	0.294678	0.391144	0.433253
shared B	1	3760001	3800000	-0.207697	-0.218991	0.0213657	0.056706
shared B	1	3800001	3840000	-0.283817	-0.303714	-0.0643235	-0.0216068
shared B	1	3840001	3880000	-0.5005	-0.507682	-0.329787	-0.256783
shared B	1	3960001	4000000	-0.98238	-0.937534	-0.889729	-0.664045
shared B	1	4000001	4040000	-1.06854	-1.04032	-1.03457	-0.824636
shared B	1	4040001	4080000	-1.11512	-1.07697	-1.10674	-0.917914
shared B	1	4080001	4120000	-1.15233	-1.10876	-1.13803	-0.974802
shared B	1	4120001	4160000	-1.22494	-1.17165	-1.1812	-1.05671
shared B	1	4160001	4200000	-1.224	-1.19851	-1.20005	-1.09862
shared B	1	4200001	4240000	-1.21464	-1.19773	-1.21737	-1.14834
shared B	1	4240001	4280000	-1.21517	-1.1924	-1.20827	-1.19732
shared B	1	4280001	4320000	-1.19124	-1.18044	-1.2092	-1.21918
shared B	1	4320001	4360000	-1.17782	-1.18169	-1.22581	-1.19652
shared B	1	4360001	4400000	-1.16013	-1.16408	-1.21992	-1.16634
shared B	1	4400001	4440000	-1.16143	-1.14103	-1.18813	-1.13762
shared B	1	4440001	4480000	-1.16958	-1.14152	-1.16797	-1.14988
shared B	1	4480001	4520000	-1.17823	-1.1324	-1.17658	-1.13927
shared B	1	4520001	4560000	-1.18237	-1.12133	-1.18061	-1.12233
shared B	1	4560001	4600000	-1.18743	-1.10992	-1.18542	-1.08688
shared B	1	4600001	4640000	-1.17414	-1.06664	-1.12211	-1.09672
shared B	1	4640001	4680000	-1.16499	-1.07329	-1.06891	-1.08823
shared B	1	4680001	4720000	-1.16525	-1.06711	-1.08934	-1.12374
shared B	1	4720001	4760000	-1.16474	-1.0429	-1.04565	-1.09333
shared B	1	4760001	4800000	-1.17402	-1.04764	-1.03945	-1.05439
shared B	1	4800001	4840000	-1.16078	-1.05071	-1.06536	-1.05976
shared B	1	4840001	4880000	-1.16337	-1.05297	-1.0604	-1.10366
shared B	1	4880001	4920000	-1.18307	-1.10968	-1.10864	-1.15224
shared B	1	4920001	4960000	-1.18666	-1.10696	-1.17499	-1.23301
shared B	1	4960001	5000000	-1.20587	-1.1285	-1.18309	-1.24231
shared B	1	5000001	5040000	-1.19747	-1.13865	-1.21841	-1.29711
shared B	1	5040001	5080000	-1.19475	-1.14827	-1.22724	-1.32528
shared B	1	5080001	5120000	-1.19846	-1.15454	-1.22472	-1.36263
shared B	1	5120001	5160000	-1.20318	-1.16251	-1.26936	-1.37694
shared B	1	5160001	5200000	-1.21275	-1.16667	-1.28086	-1.328
shared B	1	5200001	5240000	-1.22185	-1.1717	-1.28528	-1.31168
shared B	1	5240001	5280000	-1.22046	-1.1822	-1.26917	-1.31604
shared B	1	5280001	5320000	-1.20807	-1.18135	-1.24144	-1.25881
shared B	1	5320001	5360000	-1.2092	-1.18969	-1.23188	-1.22719
shared B	1	5360001	5400000	-1.21057	-1.18418	-1.20274	-1.14087
shared B	1	5400001	5440000	-1.20398	-1.18333	-1.1781	-1.10517
shared B	1	5440001	5480000	-1.1841	-1.15644	-1.16118	-1.12923
shared B	1	5480001	5520000	-1.18542	-1.15009	-1.15674	-1.11389
shared B	1	5520001	5560000	-1.21013	-1.14738	-1.14585	-1.11553
shared B	1	5560001	5600000	-1.22485	-1.13986	-1.17207	-1.12809
shared B	1	5600001	5640000	-1.23226	-1.15734	-1.17167	-1.1371
shared B	1	5640001	5680000	-1.22307	-1.1481	-1.1564	-1.17247
shared B	1	5680001	5720000	-1.2361	-1.15978	-1.17988	-1.13164
shared B	1	5720001	5760000	-1.24095	-1.18658	-1.1611	-1.08992
shared B	1	5760001	5800000	-1.25419	-1.18421	-1.1348	-1.01103
shared B	1	5800001	5840000	-1.21403	-1.17303	-1.09372	-0.907103
shared B	1	5840001	5880000	-1.17378	-1.13318	-1.0577	-0.842956
shared B	1	5880001	5920000	-1.13052	-1.08976	-0.997795	-0.749366
shared B	1	5920001	5960000	-1.0194	-1.001	-0.883789	-0.562405
shared B	1	5960001	6000000	-0.847321	-0.832975	-0.665468	-0.381423
shared B	1	6000001	6040000	-0.646589	-0.643029	-0.420436	-0.1459
shared B	1	6040001	6080000	-0.373124	-0.436257	-0.20026	0.0478369
shared A	1	6160001	6200000	0.320253	0.154168	0.487988	0.488467
shared A	1	6200001	6240000	0.440888	0.302769	0.635134	0.586699
shared A	1	6240001	6280000	0.513353	0.387973	0.684953	0.648537
shared A	1	6280001	6320000	0.585339	0.472035	0.737644	0.671735
shared A	1	6320001	6360000	0.641631	0.57592	0.791376	0.70752
shared A	1	6360001	6400000	0.712589	0.65955	0.82841	0.794874
shared A	1	6400001	6440000	0.760986	0.741615	0.899913	0.842039
shared A	1	6440001	6480000	0.815347	0.808576	0.931383	0.908686
shared A	1	6480001	6520000	0.863524	0.836184	0.965342	0.944302
shared A	1	6520001	6560000	0.890913	0.882644	1.03123	0.983223
shared A	1	6560001	6600000	0.902834	0.908583	1.06436	1.02906
shared A	1	6600001	6640000	0.847708	0.873944	1.08725	1.04186
shared A	1	6640001	6680000	0.787135	0.831792	1.1023	1.04853
shared A	1	6680001	6720000	0.710114	0.742593	1.0849	0.99541
shared A	1	6720001	6760000	0.575489	0.623252	1.04659	0.894313
shared A	1	6760001	6800000	0.451406	0.532329	1.00808	0.877945
shared A	1	6800001	6840000	0.281951	0.368896	0.934831	0.748744
B-A	1	6840001	6880000	0.0106393	0.144827	0.847205	0.676134
B-A	1	6880001	6920000	-0.209956	-0.0639423	0.731683	0.577657
B-A	1	6920001	6960000	-0.420207	-0.206355	0.681669	0.511137
B-A	1	6960001	7000000	-0.611511	-0.381663	0.583208	0.487179
B-A	1	7000001	7040000	-0.756962	-0.510364	0.540275	0.463333
B-A	1	7040001	7080000	-0.919559	-0.628054	0.455025	0.392511
B-A	1	7080001	7120000	-1.01336	-0.724182	0.416376	0.37145
B-A	1	7120001	7160000	-1.03764	-0.739608	0.352726	0.276995
B-A	1	7160001	7200000	-1.01557	-0.721371	0.371111	0.272042
B-A	1	7200001	7240000	-0.975926	-0.690324	0.420723	0.265557
B-A	1	7240001	7280000	-0.947405	-0.607189	0.445962	0.244195
B-A	1	7280001	7320000	-0.905514	-0.550285	0.45155	0.267833
B-A	1	7320001	7360000	-0.811351	-0.531881	0.494892	0.289447
B-A	1	7360001	7400000	-0.702439	-0.473509	0.524153	0.288253
B-A	1	7400001	7440000	-0.643484	-0.392807	0.604001	0.382065
B-A	1	7440001	7480000	-0.672493	-0.38388	0.623349	0.369536
B-A	1	7480001	7520000	-0.688321	-0.462813	0.626578	0.399346
B-A	1	7520001	7560000	-0.715875	-0.510563	0.607122	0.399376
B-A	1	7560001	7600000	-0.753678	-0.55633	0.613235	0.366534
B-A	1	7600001	7640000	-0.819991	-0.55041	0.572866	0.297361
B-A	1	7640001	7680000	-0.855624	-0.572567	0.571139	0.328704
B-A	1	7680001	7720000	-0.842812	-0.602557	0.534658	0.345838
B-A	1	7720001	7760000	-0.681296	-0.497686	0.582734	0.380886
B-A	1	7760001	7800000	-0.520826	-0.362461	0.627252	0.416803
B-A	1	7800001	7840000	-0.321115	-0.269569	0.650318	0.438065
B-A	1	7840001	7880000	-0.0917433	-0.106551	0.680046	0.525524
shared A	1	7880001	7920000	0.205819	0.113662	0.806444	0.657487
shared A	1	7920001	7960000	0.558623	0.396383	0.901281	0.75517
shared A	1	7960001	8000000	0.802838	0.64383	0.994411	0.859287
shared A	1	8000001	8040000	0.941323	0.779881	1.03488	0.931282
shared A	1	8040001	8080000	1.05731	0.944991	1.09702	0.976815
shared A	1	8080001	8120000	1.13558	1.07497	1.15551	1.01143
shared A	1	8120001	8160000	1.19696	1.12793	1.1907	1.07131
shared A	1	8160001	8200000	1.21981	1.15757	1.16241	1.05039
shared A	1	8200001	8240000	1.20948	1.14914	1.17011	1.02064
shared A	1	8240001	8280000	1.20944	1.13059	1.15149	0.968964
shared A	1	8280001	8320000	1.2226	1.15561	1.16666	0.983318
shared A	1	8320001	8360000	1.24055	1.17137	1.1521	0.976693
shared A	1	8360001	8400000	1.25549	1.19494	1.19748	1.03134
shared A	1	8400001	8440000	1.26744	1.23536	1.21706	1.02408
shared A	1	8440001	8480000	1.27	1.25071	1.24471	1.00166
shared A	1	8480001	8520000	1.27703	1.2559	1.22182	1.05049
shared A	1	8520001	8560000	1.28826	1.2689	1.22703	1.0665
shared A	1	8560001	8600000	1.28493	1.26752	1.2169	1.06483
shared A	1	8600001	8640000	1.27705	1.26839	1.21845	1.08487
shared A	1	8640001	8680000	1.28412	1.25808	1.20359	1.09955
shared A	1	8680001	8720000	1.28566	1.26155	1.16433	1.05378
shared A	1	8720001	8760000	1.28094	1.26723	1.18962	1.11387
shared A	1	8760001	8800000	1.28194	1.26942	1.20435	1.10208
shared A	1	8800001	8840000	1.28832	1.26926	1.2367	1.15902
shared A	1	8840001	8880000	1.28293	1.28301	1.26153	1.18364
shared A	1	8880001	8920000	1.27418	1.27166	1.2608	1.21819
shared A	1	8920001	8960000	1.27153	1.27646	1.26486	1.23465
shared A	1	8960001	9000000	1.25985	1.27623	1.28206	1.30231
shared A	1	9000001	9040000	1.26121	1.26769	1.27405	1.30856
shared A	1	9040001	9080000	1.24062	1.26151	1.27027	1.30392
shared A	1	9080001	9120000	1.24044	1.26117	1.2627	1.27065
shared A	1	9120001	9160000	1.25223	1.26872	1.25386	1.2396
shared A	1	9160001	9200000	1.25352	1.28938	1.23904	1.25078
shared A	1	9200001	9240000	1.25882	1.2863	1.24176	1.24607
shared A	1	9240001	9280000	1.26318	1.27516	1.23086	1.25672
shared A	1	9280001	9320000	1.27345	1.29559	1.23104	1.23157
shared A	1	9320001	9360000	1.26725	1.29296	1.23078	1.25435
shared A	1	9360001	9400000	1.27176	1.28619	1.19959	1.26171
shared A	1	9400001	9440000	1.26281	1.28831	1.19827	1.21586
shared A	1	9440001	9480000	1.25823	1.26505	1.21211	1.18434
shared A	1	9480001	9520000	1.25892	1.27553	1.20919	1.22232
shared A	1	9520001	9560000	1.26274	1.26182	1.22805	1.17116
shared A	1	9560001	9600000	1.26134	1.26916	1.23551	1.2011
shared A	1	9600001	9640000	1.26444	1.27411	1.23786	1.22999
shared A	1	9640001	9680000	1.26268	1.27645	1.25249	1.23882
shared A	1	9680001	9720000	1.2712	1.2708	1.23301	1.26365
shared A	1	9720001	9760000	1.28202	1.27768	1.22406	1.26662
shared A	1	9760001	9800000	1.2778	1.26384	1.22865	1.26946
shared A	1	9800001	9840000	1.27643	1.28981	1.23985	1.29224
shared A	1	9840001	9880000	1.26978	1.29177	1.24731	1.27541
shared A	1	9880001	9920000	1.27218	1.27806	1.24473	1.24938
shared A	1	9920001	9960000	1.27112	1.28122	1.20693	1.24138
shared A	1	9960001	10000000	1.27852	1.28563	1.21454	1.21777
shared A	1	10000001	10040000	1.27937	1.2871	1.21669	1.22051
shared A	1	10040001	10080000	1.28166	1.29941	1.19867	1.17875
shared A	1	10080001	10120000	1.27341	1.29031	1.20398	1.16268
shared A	1	10120001	10160000	1.27906	1.28645	1.20744	1.17635
shared A	1	10160001	10200000	1.2741	1.2967	1.20607	1.16458
shared A	1	10200001	10240000	1.27837	1.30116	1.22974	1.14927
shared A	1	10240001	10280000	1.28495	1.29539	1.22587	1.11251
shared A	1	10280001	10320000	1.28011	1.29569	1.22081	1.10813
shared A	1	10320001	10360000	1.28101	1.27825	1.24113	1.13773
shared A	1	10360001	10400000	1.28922	1.27021	1.23595	1.13311
shared A	1	10400001	10440000	1.30152	1.27253	1.23925	1.16604
shared A	1	10440001	10480000	1.30494	1.25872	1.21822	1.17409
shared A	1	10480001	10520000	1.29743	1.22059	1.20582	1.18102
shared A	1	10520001	10560000	1.29208	1.17123	1.18505	1.21232
shared A	1	10560001	10600000	1.27131	1.1453	1.16836	1.23382
shared A	1	10600001	10640000	1.26289	1.12715	1.16814	1.20569
shared A	1	10640001	10680000	1.24855	1.08475	1.129	1.2177
shared A	1	10680001	10720000	1.21939	1.05438	1.12119	1.16812
shared A	1	10720001	10760000	1.21367	1.03067	1.12157	1.12729
shared A	1	10760001	10800000	1.21915	1.00949	1.11251	1.09271
shared A	1	10800001	10840000	1.21331	1.00486	1.11906	1.08634
shared A	1	10840001	10880000	1.21566	0.950122	1.14099	1.07267
shared A	1	10880001	10920000	1.19401	0.958088	1.12109	1.01882
shared A	1	10920001	10960000	1.19491	0.925957	1.15775	0.960828
shared A	1	10960001	11000000	1.19653	0.913557	1.12795	1.00772
shared A	1	11000001	11040000	1.16317	0.889327	1.11487	1.01509
shared A	1	11040001	11080000	1.12142	0.891269	1.07904	1.00262
shared A	1	11080001	11120000	1.05499	0.813468	1.04834	0.996131
shared A	1	11120001	11160000	0.954806	0.729186	1.00361	0.945054
shared A	1	11160001	11200000	0.842698	0.604902	0.900391	0.901338
shared A	1	11200001	11240000	0.610933	0.418513	0.747028	0.894839
shared A	1	11240001	11280000	0.323383	0.149621	0.577567	0.809623
B-A	1	11280001	11320000	-0.100703	-0.163087	0.409232	0.730413
B-A	1	11320001	11360000	-0.51287	-0.474539	0.233	0.630059
B-A	1	11360001	11400000	-0.839945	-0.714071	0.00140996	0.499025
B-A	1	11400001	11440000	-1.01593	-0.864728	-0.143445	0.381422
B-A	1	11440001	11480000	-1.14377	-1.00814	-0.2423	0.300377
B-A	1	11480001	11520000	-1.16714	-1.05909	-0.299512	0.22815
B-A	1	11520001	11560000	-1.16876	-1.07156	-0.286481	0.204265
B-A	1	11560001	11600000	-1.13081	-1.02586	-0.243575	0.233414
B-A	1	11600001	11640000	-0.994246	-0.898948	-0.127353	0.34416
B-A	1	11640001	11680000	-0.813244	-0.764352	0.0611529	0.447757
B-A	1	11680001	11720000	-0.590187	-0.566487	0.192643	0.556403
B-A	1	11720001	11760000	-0.212876	-0.401616	0.404199	0.705544
B-A	1	11760001	11800000	0.168703	-0.0550659	0.634193	0.846178
shared A	1	11800001	11840000	0.482102	0.260672	0.773711	0.976777
shared A	1	11840001	11880000	0.677912	0.54082	0.870308	1.05495
shared A	1	11880001	11920000	0.785925	0.661693	0.902659	1.03628
shared A	1	11920001	11960000	0.843626	0.729312	0.938402	1.02562
shared A	1	11960001	12000000	0.868529	0.763345	0.934851	1.03173
shared A	1	12000001	12040000	0.825657	0.741042	0.91773	0.971545
shared A	1	12040001	12080000	0.77627	0.703923	0.83643	0.899991
shared A	1	12080001	12120000	0.744932	0.677606	0.777709	0.819245
shared A	1	12120001	12160000	0.668457	0.600751	0.708242	0.743912
shared A	1	12160001	12200000	0.572776	0.509577	0.640275	0.662204
shared A	1	12200001	12240000	0.452125	0.383785	0.529813	0.585426
shared A	1	12240001	12280000	0.335852	0.282306	0.415043	0.465917
shared A	1	12280001	12320000	0.26822	0.252748	0.292891	0.381002
shared A	1	12320001	12360000	0.230507	0.254845	0.211553	0.306335
shared A	1	12400001	12440000	0.204293	0.236568	0.0721221	0.118392
shared A	1	12440001	12480000	0.200984	0.259419	0.0211235	0.0718213
shared A	1	12480001	12520000	0.246048	0.305143	-0.038729	0.0140701
shared A	1	12520001	12560000	0.27545	0.318056	-0.0336825	0.0481189
shared A	1	12560001	12600000	0.217854	0.235351	-0.104955	-0.0360603
shared B	1	12680001	12720000	-0.514058	-0.466576	-0.666868	-0.462253
shared B	1	12720001	12760000	-0.75695	-0.709049	-0.846932	-0.64227
shared B	1	12760001	12800000	-0.973929	-0.932024	-1.00978	-0.853043
shared B	1	12800001	12840000	-1.1234	-1.0855	-1.14261	-1.0327
shared B	1	12840001	12880000	-1.18271	-1.17908	-1.19565	-1.16566
shared B	1	12880001	12920000	-1.19836	-1.19357	-1.19843	-1.13206
shared B	1	12920001	12960000	-1.18651	-1.18799	-1.15401	-1.09232
shared B	1	12960001	13000000	-1.13931	-1.15268	-1.10225	-0.996827
shared B	1	13000001	13040000	-1.08534	-1.10676	-1.0321	-0.944606
shared B	1	13040001	13080000	-1.0854	-1.08597	-1.0285	-0.921293
shared B	1	13080001	13120000	-1.07531	-1.01871	-0.943972	-0.861611
shared B	1	13120001	13160000	-1.01936	-0.940497	-0.868163	-0.745777
shared B	1	13160001	13200000	-1.00529	-0.899004	-0.824395	-0.731003
shared B	1	13200001	13240000	-0.962551	-0.825836	-0.835258	-0.76111
shared B	1	13320001	13360000	-0.698164	-0.661895	-0.540967	-0.495093
shared B	1	13360001	13400000	-0.571858	-0.612757	-0.459218	-0.329282
shared B	1	13400001	13440000	-0.582388	-0.614148	-0.474792	-0.318589
shared B	1	13440001	13480000	-0.582388	-0.614148	-0.474792	-0.318589
shared B	1	13480001	13520000	-0.521633	-0.561247	-0.400049	-0.142271
shared B	1	13520001	13560000	-0.496013	-0.491594	-0.224051	-0.104386
shared B	1	13600001	13640000	-0.593286	-0.547258	-0.283321	-0.221134
shared B	1	13640001	13680000	-0.717264	-0.672313	-0.453328	-0.358952
shared B	1	13680001	13720000	-0.894728	-0.891702	-0.689635	-0.556539
shared B	1	13720001	13760000	-0.991289	-1.00567	-0.812958	-0.713745
shared B	1	13760001	13800000	-1.0642	-1.09845	-0.940631	-0.832931
shared B	1	13800001	13840000	-1.12567	-1.15092	-1.06241	-0.9623
shared B	1	13840001	13880000	-1.18818	-1.21896	-1.16673	-1.03726
shared B	1	13880001	13920000	-1.22986	-1.2485	-1.24764	-1.09427
shared B	1	13920001	13960000	-1.17578	-1.19518	-1.20088	-1.07667
shared B	1	13960001	14000000	-1.08804	-1.07829	-1.12124	-1.0593
shared B	1	14000001	14040000	-1.05961	-1.02771	-1.1246	-1.02276
shared B	1	14040001	14080000	-1.05324	-1.009	-1.13044	-1.01716
shared B	1	14080001	14120000	-1.05009	-0.984168	-1.14573	-1.00838
shared B	1	14120001	14160000	-1.06735	-1.01482	-1.15956	-1.05691
shared B	1	14160001	14200000	-1.10906	-1.06713	-1.19563	-1.12601
shared B	1	14200001	14240000	-1.18257	-1.13685	-1.26099	-1.17252
shared B	1	14240001	14280000	-1.25454	-1.23582	-1.30355	-1.24189
shared B	1	14280001	14320000	-1.2642	-1.25326	-1.33279	-1.31761
shared B	1	14320001	14360000	-1.27253	-1.25712	-1.31523	-1.35228
shared B	1	14360001	14400000	-1.27072	-1.26857	-1.31698	-1.37964
shared B	1	14400001	14440000	-1.26425	-1.26289	-1.31992	-1.38279
shared B	1	14440001	14480000	-1.28497	-1.27113	-1.34781	-1.35699
shared B	1	14480001	14520000	-1.28001	-1.27653	-1.35741	-1.38121
shared B	1	14520001	14560000	-1.2846	-1.26836	-1.35269	-1.37735
shared B	1	14560001	14600000	-1.27876	-1.27314	-1.3499	-1.33131
shared B	1	14600001	14640000	-1.27418	-1.26497	-1.34303	-1.32145
shared B	1	14640001	14680000	-1.26569	-1.24169	-1.32747	-1.30873
shared B	1	14680001	14720000	-1.25628	-1.25524	-1.31522	-1.26689
shared B	1	14720001	14760000	-1.26416	-1.25025	-1.31249	-1.23948
shared B	1	14760001	14800000	-1.25455	-1.23062	-1.30429	-1.21167
shared B	1	14800001	14840000	-1.26182	-1.23196	-1.30658	-1.177
shared B	1	14840001	14880000	-1.26646	-1.21964	-1.32166	-1.15479
shared B	1	14880001	14920000	-1.25906	-1.2295	-1.31569	-1.15687
shared B	1	14920001	14960000	-1.25979	-1.23036	-1.29519	-1.17449
shared B	1	14960001	15000000	-1.26326	-1.24431	-1.29427	-1.15891
shared B	1	15000001	15040000	-1.25844	-1.23016	-1.28725	-1.09471
shared B	1	15040001	15080000	-1.26566	-1.25067	-1.24536	-0.991274
shared B	1	15080001	15120000	-1.2557	-1.24204	-1.22795	-0.96246
shared B	1	15120001	15160000	-1.19405	-1.185	-1.148	-0.899821
shared B	1	15160001	15200000	-1.10338	-1.07502	-1.08676	-0.814852
shared B	1	15200001	15240000	-1.06269	-1.01521	-1.05134	-0.767736
shared B	1	15240001	15280000	-1.02067	-0.957141	-1.03883	-0.73295
shared B	1	15280001	15320000	-0.973001	-0.892955	-1.00344	-0.682507
shared B	1	15320001	15360000	-0.878921	-0.795221	-0.961565	-0.65162
shared B	1	15360001	15400000	-0.764499	-0.67839	-0.814192	-0.582509
shared B	1	15400001	15440000	-0.746887	-0.706223	-0.746813	-0.547408
shared B	1	15440001	15480000	-0.762504	-0.752788	-0.702352	-0.453846
shared B	1	15480001	15520000	-0.697762	-0.757091	-0.614562	-0.404151
shared B	1	15520001	15560000	-0.526759	-0.619245	-0.412546	-0.30142
shared B	1	15560001	15600000	-0.333493	-0.470055	-0.251129	-0.171944
shared A	1	15720001	15760000	0.296461	0.0758915	0.279328	0.263181
shared A	1	15760001	15800000	0.50004	0.353024	0.445652	0.442003
shared A	1	15800001	15840000	0.657709	0.555467	0.585939	0.591107
shared A	1	15840001	15880000	0.804013	0.71811	0.742162	0.721771
shared A	1	15880001	15920000	0.93511	0.866569	0.821783	0.841378
shared A	1	15920001	15960000	1.04843	0.992542	0.909355	0.954178
shared A	1	15960001	16000000	1.12906	1.10268	1.00671	1.03267
shared A	1	16000001	16040000	1.16789	1.17569	1.03854	1.06343
shared A	1	16040001	16080000	1.20597	1.20426	1.08432	1.11492
shared A	1	16080001	16120000	1.21707	1.2231	1.11787	1.1383
shared A	1	16120001	16160000	1.22284	1.24523	1.11972	1.15735
shared A	1	16160001	16200000	1.22974	1.26131	1.14892	1.13877
shared A	1	16200001	16240000	1.23869	1.27971	1.15488	1.17329
shared A	1	16240001	16280000	1.25042	1.28656	1.15641	1.17273
shared A	1	16280001	16320000	1.25067	1.28892	1.16814	1.20644
shared A	1	16320001	16360000	1.23833	1.2933	1.18744	1.20607
shared A	1	16360001	16400000	1.23867	1.30872	1.17313	1.22467
shared A	1	16400001	16440000	1.23865	1.3098	1.18971	1.21023
shared A	1	16440001	16480000	1.23572	1.31132	1.2173	1.20894
shared A	1	16480001	16520000	1.24111	1.30702	1.2116	1.19181
shared A	1	16520001	16560000	1.24546	1.30715	1.21865	1.17577
shared A	1	16560001	16600000	1.24136	1.29801	1.22442	1.18909
shared A	1	16600001	16640000	1.23224	1.2867	1.21752	1.18582
shared A	1	16640001	16680000	1.20826	1.25998	1.2304	1.2156
shared A	1	16680001	16720000	1.16598	1.20473	1.2427	1.21359
shared A	1	16720001	16760000	1.07791	1.11463	1.23503	1.16056
shared A	1	16760001	16800000	0.973191	1.0011	1.23277	1.148
shared A	1	16800001	16840000	0.851636	0.870221	1.22117	1.16991
shared A	1	16840001	16880000	0.703496	0.735787	1.20871	1.0964
shared A	1	16880001	16920000	0.491077	0.518942	1.18539	1.07838
B-A	1	16920001	16960000	0.246873	0.302268	1.15257	1.01408
B-A	1	16960001	17000000	-0.00164727	0.119839	1.11304	0.925112
B-A	1	17000001	17040000	-0.183635	0.0153929	1.02886	0.828431
B-A	1	17040001	17080000	-0.201214	0.0075806	0.968659	0.781859
B-A	1	17080001	17120000	-0.148983	0.0275023	0.96615	0.766185
B-A	1	17120001	17160000	-0.0283525	0.0790575	0.976294	0.787798
B-A	1	17160001	17200000	0.177389	0.244957	0.991182	0.789788
shared A	1	17200001	17240000	0.354111	0.363642	0.982645	0.773155
shared A	1	17240001	17280000	0.515249	0.445266	0.977463	0.816729
shared A	1	17280001	17320000	0.645583	0.477226	1.01333	0.904501
shared A	1	17320001	17360000	0.683322	0.493755	0.986765	0.912146
shared A	1	17360001	17400000	0.699477	0.497341	0.94338	0.890284
shared A	1	17400001	17440000	0.68934	0.477471	0.873939	0.832941
shared A	1	17440001	17480000	0.607419	0.354672	0.801719	0.79149
shared A	1	17480001	17520000	0.510333	0.217878	0.768289	0.7756
shared A	1	17520001	17560000	0.454229	0.126003	0.743256	0.734554
shared A	1	17560001	17600000	0.410016	0.0966763	0.692321	0.709645
shared A	1	17600001	17640000	0.358002	0.0671928	0.655643	0.712231
shared A	1	17640001	17680000	0.226808	-0.0573571	0.558369	0.667849
B-A	1	17680001	17720000	0.0824385	-0.175372	0.446355	0.613858
B-A	1	17720001	17760000	0.0319317	-0.219209	0.362874	0.55116
shared B	1	17840001	17880000	-0.207324	-0.220606	0.0540363	0.363788
shared B	1	17880001	17920000	-0.393589	-0.385063	-0.149735	0.24269
shared B	1	17920001	17960000	-0.537902	-0.522744	-0.269725	0.140674
B-A	1	17960001	18000000	-0.657639	-0.646788	-0.313356	0.0933113
B-A	1	18000001	18040000	-0.819951	-0.790457	-0.420243	-0.016027
B-A	1	18040001	18080000	-0.971648	-0.936012	-0.560247	-0.113588
B-A	1	18080001	18120000	-1.067	-1.05117	-0.675481	-0.19998
B-A	1	18120001	18160000	-1.14003	-1.11913	-0.746181	-0.334461
shared B	1	18160001	18200000	-1.19414	-1.17298	-0.807415	-0.459074
shared B	1	18200001	18240000	-1.23115	-1.20215	-0.902376	-0.526154
shared B	1	18240001	18280000	-1.24842	-1.23245	-0.972682	-0.611775
shared B	1	18280001	18320000	-1.26216	-1.24951	-1.00596	-0.652838
shared B	1	18320001	18360000	-1.26862	-1.28682	-1.04599	-0.728306
shared B	1	18360001	18400000	-1.28061	-1.29652	-1.08854	-0.758398
shared B	1	18400001	18440000	-1.28486	-1.31051	-1.10787	-0.750372
shared B	1	18440001	18480000	-1.28196	-1.30586	-1.10828	-0.747672
shared B	1	18480001	18520000	-1.28462	-1.31116	-1.11348	-0.76281
shared B	1	18520001	18560000	-1.28525	-1.32174	-1.12917	-0.824309
shared B	1	18560001	18600000	-1.2845	-1.32528	-1.18367	-0.893717
shared B	1	18600001	18640000	-1.29394	-1.3118	-1.23282	-0.920582
shared B	1	18640001	18680000	-1.30258	-1.30272	-1.25476	-0.955539
shared B	1	18680001	18720000	-1.30888	-1.30874	-1.26112	-0.958392
shared B	1	18720001	18760000	-1.30941	-1.31827	-1.2583	-0.96268
shared B	1	18760001	18800000	-1.32302	-1.31851	-1.24683	-0.92565
shared B	1	18800001	18840000	-1.31903	-1.2972	-1.20252	-0.896868
shared B	1	18840001	18880000	-1.31213	-1.27137	-1.16617	-0.78952
shared B	1	18880001	18920000	-1.29593	-1.25854	-1.1315	-0.686749
shared B	1	18920001	18960000	-1.28215	-1.26625	-1.07577	-0.57689
B-A	1	18960001	19000000	-1.2688	-1.2494	-1.03686	-0.498735
B-A	1	19000001	19040000	-1.25342	-1.24484	-1.003	-0.388354
B-A	1	19040001	19080000	-1.21558	-1.21502	-0.962624	-0.359732
B-A	1	19080001	19120000	-1.14265	-1.14381	-0.886091	-0.214944
B-A	1	19120001	19160000	-0.987069	-0.955599	-0.726963	-0.0780347
B-A	1	19160001	19200000	-0.760748	-0.71429	-0.531354	0.0955947
shared B	1	19200001	19240000	-0.483304	-0.390482	-0.275209	0.259243
shared A	1	19320001	19360000	0.431675	0.505515	0.429839	0.788878
shared A	1	19360001	19400000	0.58489	0.649243	0.588126	0.876986
shared A	1	19400001	19440000	0.630935	0.717575	0.651278	0.953483
shared A	1	19440001	19480000	0.723271	0.773329	0.717245	1.00033
shared A	1	19480001	19520000	0.797133	0.84586	0.825971	1.06687
shared A	1	19520001	19560000	0.859552	0.903891	0.914951	1.07289
shared A	1	19560001	19600000	0.901581	0.941399	0.9365	1.08791
shared A	1	19600001	19640000	0.913721	0.973383	0.947727	1.06186
shared A	1	19640001	19680000	0.912997	0.979834	0.957779	1.04884
shared A	1	19680001	19720000	0.927977	0.982459	0.973976	1.01098
shared A	1	19720001	19760000	0.916062	0.967886	0.990158	0.95499
shared A	1	19760001	19800000	0.92161	0.959107	0.985016	0.964933
shared A	1	19800001	19840000	0.922593	0.962525	0.986685	0.998211
shared A	1	19840001	19880000	0.913531	0.946295	0.987467	1.00828
shared A	1	19880001	19920000	0.857875	0.898268	1.01401	1.02037
shared A	1	19920001	19960000	0.797548	0.825736	1.0308	1.08041
shared A	1	19960001	20000000	0.745388	0.755333	1.00949	1.1227
shared A	1	20000001	20040000	0.676374	0.706498	0.943513	1.12565
shared A	1	20040001	20080000	0.56189	0.624188	0.911756	1.13373
shared A	1	20080001	20120000	0.379725	0.466434	0.896748	1.07246
B-A	1	20120001	20160000	0.0743581	0.209715	0.852644	1.02519
B-A	1	20160001	20200000	-0.239472	-0.0341239	0.756511	0.933826
B-A	1	20200001	20240000	-0.510909	-0.329384	0.627446	0.790372
B-A	1	20240001	20280000	-0.765166	-0.55914	0.507249	0.688863
B-A	1	20280001	20320000	-0.975895	-0.785154	0.453015	0.604957
B-A	1	20320001	20360000	-1.09659	-0.925235	0.329155	0.45522
B-A	1	20360001	20400000	-1.14544	-1.01021	0.259958	0.435298
B-A	1	20400001	20440000	-1.14682	-1.01653	0.269657	0.434893
B-A	1	20440001	20480000	-1.12372	-1.0095	0.289789	0.508385
B-A	1	20480001	20520000	-1.10403	-0.995068	0.359025	0.618878
B-A	1	20520001	20560000	-1.07521	-0.996911	0.365221	0.654152
B-A	1	20560001	20600000	-1.02086	-0.914566	0.421077	0.71904
B-A	1	20600001	20640000	-0.960191	-0.840217	0.459417	0.752008
B-A	1	20640001	20680000	-0.893141	-0.759214	0.46023	0.772885
B-A	1	20680001	20720000	-0.794845	-0.629425	0.509522	0.787042
B-A	1	20720001	20760000	-0.606569	-0.428593	0.589423	0.865892
B-A	1	20760001	20800000	-0.332019	-0.106107	0.676499	0.918418
B-A	1	20800001	20840000	-0.0520095	0.211291	0.814178	0.97776
B-A	1	20840001	20880000	0.244336	0.463825	0.877717	1.04226
shared A	1	20880001	20920000	0.549757	0.739758	0.936401	1.1307
shared A	1	20920001	20960000	0.817031	0.993168	1.03774	1.18654
shared A	1	20960001	21000000	1.00047	1.15074	1.10641	1.21224
shared A	1	21000001	21040000	1.08439	1.20706	1.13944	1.23412
shared A	1	21040001	21080000	1.15381	1.24365	1.18394	1.22531
shared A	1	21080001	21120000	1.21515	1.275	1.19206	1.24769
shared A	1	21120001	21160000	1.23665	1.30776	1.20517	1.26847
shared A	1	21160001	21200000	1.26004	1.3132	1.19491	1.26102
shared A	1	21200001	21240000	1.27408	1.3066	1.20809	1.25247
shared A	1	21240001	21280000	1.27818	1.3114	1.20042	1.27335
shared A	1	21280001	21320000	1.27059	1.3027	1.2105	1.27287
shared A	1	21320001	21360000	1.27953	1.30392	1.2036	1.292
shared A	1	21360001	21400000	1.28017	1.29865	1.21306	1.25609
shared A	1	21400001	21440000	1.28359	1.30016	1.21487	1.2606
shared A	1	21440001	21480000	1.28559	1.30916	1.23232	1.26697
shared A	1	21480001	21520000	1.30731	1.33546	1.25376	1.28269
shared A	1	21520001	21560000	1.30945	1.33438	1.26092	1.25784
shared A	1	21560001	21600000	1.32358	1.32519	1.2688	1.28915
shared A	1	21600001	21640000	1.3172	1.31675	1.25358	1.27202
shared A	1	21640001	21680000	1.31016	1.31816	1.24795	1.31128
shared A	1	21680001	21720000	1.30669	1.3315	1.2441	1.27904
shared A	1	21720001	21760000	1.29495	1.31717	1.24908	1.27695
shared A	1	21760001	21800000	1.27829	1.29642	1.23894	1.2694
shared A	1	21800001	21840000	1.2779	1.31581	1.22806	1.23743
shared A	1	21840001	21880000	1.27772	1.33814	1.22084	1.24021
shared A	1	21880001	21920000	1.29753	1.35412	1.23776	1.23505
shared A	1	21920001	21960000	1.29096	1.33493	1.24223	1.22051
shared A	1	21960001	22000000	1.29127	1.32789	1.24927	1.2258
shared A	1	22000001	22040000	1.28206	1.34209	1.26011	1.24945
shared A	1	22040001	22080000	1.28166	1.32407	1.23578	1.20102
shared A	1	22080001	22120000	1.26898	1.30403	1.23846	1.21085
shared A	1	22120001	22160000	1.26478	1.29837	1.24412	1.20898
shared A	1	22160001	22200000	1.25322	1.27975	1.21442	1.24244
shared A	1	22200001	22240000	1.25852	1.28066	1.21196	1.23682
shared A	1	22240001	22280000	1.2458	1.27431	1.20685	1.24188
shared A	1	22280001	22320000	1.23431	1.26381	1.19744	1.24361
shared A	1	22320001	22360000	1.21272	1.2401	1.21129	1.21223
shared A	1	22360001	22400000	1.17016	1.18663	1.19622	1.1788
shared A	1	22400001	22440000	1.13833	1.08731	1.13912	1.13468
shared A	1	22440001	22480000	1.09377	1.01994	1.13596	1.09048
shared A	1	22480001	22520000	1.03954	0.916937	1.1236	1.0176
shared A	1	22520001	22560000	0.987846	0.802129	1.0796	0.992598
shared A	1	22560001	22600000	0.945468	0.71387	1.0739	0.940518
shared A	1	22600001	22640000	0.942587	0.726241	1.07307	0.988898
shared A	1	22640001	22680000	0.956382	0.787786	1.0814	1.00459
shared A	1	22680001	22720000	0.971677	0.84343	1.06803	1.01832
shared A	1	22720001	22760000	0.981395	0.885251	1.09226	1.00283
shared A	1	22760001	22800000	0.974222	0.896517	1.07694	1.0122
shared A	1	22800001	22840000	0.982516	0.888825	1.07814	1.01266
shared A	1	22840001	22880000	0.997543	0.879788	1.06489	1.00158
shared A	1	22880001	22920000	0.998102	0.887063	1.05664	0.98924
shared A	1	22920001	22960000	0.995339	0.938421	1.08056	1.00541
shared A	1	22960001	23000000	0.985916	0.953234	1.13681	1.03542
shared A	1	23000001	23040000	1.02032	0.98053	1.13561	1.09297
shared A	1	23040001	23080000	1.01606	1.04067	1.15185	1.13043
shared A	1	23080001	23120000	1.01556	1.06801	1.16848	1.1501
shared A	1	23120001	23160000	1.02247	1.05185	1.18863	1.18017
shared A	1	23160001	23200000	1.0163	1.04738	1.19933	1.18771
shared A	1	23200001	23240000	1.0185	1.05029	1.17138	1.12357
shared A	1	23240001	23280000	1.05783	1.07749	1.15157	1.13652
shared A	1	23280001	23320000	1.06737	1.09058	1.16301	1.10309
shared A	1	23320001	23360000	1.1241	1.12368	1.15567	1.16828
shared A	1	23360001	23400000	1.15402	1.1463	1.17413	1.17588
shared A	1	23400001	23440000	1.1787	1.17211	1.20487	1.19583
shared A	1	23440001	23480000	1.18714	1.19862	1.18907	1.20868
shared A	1	23480001	23520000	1.19547	1.22415	1.20322	1.19784
shared A	1	23520001	23560000	1.20484	1.23168	1.18536	1.17332
shared A	1	23560001	23600000	1.21955	1.21216	1.1743	1.19724
shared A	1	23600001	23640000	1.22073	1.19635	1.19773	1.15785
shared A	1	23640001	23680000	1.23336	1.18379	1.2043	1.17312
shared A	1	23680001	23720000	1.23091	1.20824	1.20368	1.17822
shared A	1	23720001	23760000	1.24365	1.24758	1.21048	1.18022
shared A	1	23760001	23800000	1.23859	1.24864	1.24027	1.21512
shared A	1	23800001	23840000	1.23459	1.2583	1.23159	1.24102
shared A	1	23840001	23880000	1.2364	1.26334	1.22068	1.22327
shared A	1	23880001	23920000	1.23329	1.26581	1.2175	1.23934
shared A	1	23920001	23960000	1.22606	1.28693	1.21345	1.22724
shared A	1	23960001	24000000	1.23046	1.281	1.19698	1.23555
shared A	1	24000001	24040000	1.22324	1.27698	1.1967	1.26747
shared A	1	24040001	24080000	1.22322	1.26477	1.18443	1.24372
shared A	1	24080001	24120000	1.21693	1.25876	1.23823	1.25567
shared A	1	24120001	24160000	1.20845	1.25405	1.23814	1.2763
shared A	1	24160001	24200000	1.20587	1.25982	1.22948	1.25972
shared A	1	24200001	24240000	1.19995	1.25814	1.22654	1.29727
shared A	1	24240001	24280000	1.18676	1.2332	1.22432	1.27972
shared A	1	24280001	24320000	1.16575	1.20223	1.22368	1.2309
shared A	1	24320001	24360000	1.15123	1.19178	1.20111	1.20394
shared A	1	24360001	24400000	1.09747	1.18809	1.18091	1.18714
shared A	1	24400001	24440000	1.07196	1.19153	1.19807	1.19671
shared A	1	24440001	24480000	1.00775	1.15943	1.15936	1.16308
shared A	1	24480001	24520000	0.989562	1.13595	1.15937	1.13455
shared A	1	24520001	24560000	0.948992	1.11067	1.15288	1.15711
shared A	1	24560001	24600000	0.961584	1.1026	1.14544	1.14907
shared A	1	24600001	24640000	0.953921	1.1069	1.14905	1.1238
shared A	1	24640001	24680000	0.971506	1.13746	1.15853	1.09381
shared A	1	24680001	24720000	0.980187	1.15376	1.16787	1.07711
shared A	1	24720001	24760000	1.00464	1.16729	1.1769	1.09424
shared A	1	24760001	24800000	0.999709	1.15659	1.17408	1.13023
shared A	1	24800001	24840000	1.03053	1.14855	1.19305	1.08468
shared A	1	24840001	24880000	1.0547	1.1725	1.17957	1.08045
shared A	1	24880001	24920000	1.07891	1.19719	1.20239	1.10413
shared A	1	24920001	24960000	1.11554	1.18535	1.19408	1.12437
shared A	1	24960001	25000000	1.12702	1.18277	1.20089	1.13655
shared A	1	25000001	25040000	1.13357	1.19725	1.18989	1.14186
shared A	1	25040001	25080000	1.1233	1.20678	1.18101	1.11789
shared A	1	25080001	25120000	1.11897	1.20824	1.17021	1.12832
shared A	1	25120001	25160000	1.11292	1.18182	1.18258	1.14969
shared A	1	25160001	25200000	1.08881	1.13738	1.13245	1.15778
shared A	1	25200001	25240000	1.02908	1.08352	1.10326	1.13152
shared A	1	25240001	25280000	0.948269	1.02651	1.07005	1.10814
shared A	1	25280001	25320000	0.88641	0.942333	1.0686	1.09994
shared A	1	25320001	25360000	0.861608	0.885275	1.05047	1.14747
shared A	1	25360001	25400000	0.84258	0.836837	1.06801	1.09894
shared A	1	25400001	25440000	0.833206	0.879838	1.06322	1.083
shared A	1	25440001	25480000	0.881047	0.944184	1.09235	1.10854
shared A	1	25480001	25520000	0.920327	0.991754	1.11751	1.15332
shared A	1	25520001	25560000	0.989568	1.0745	1.10079	1.12278
shared A	1	25560001	25600000	1.02391	1.12203	1.09574	1.12266
shared A	1	25600001	25640000	1.07883	1.17741	1.11327	1.06692
shared A	1	25640001	25680000	1.13193	1.21939	1.10078	1.09906
shared A	1	25680001	25720000	1.13092	1.21376	1.09343	1.13059
shared A	1	25720001	25760000	1.12089	1.18786	1.10177	1.13965
shared A	1	25760001	25800000	1.11842	1.18811	1.09984	1.08623
shared A	1	25800001	25840000	1.10274	1.15413	1.11028	1.08907
shared A	1	25840001	25880000	1.08386	1.12816	1.12784	1.08856
shared A	1	25880001	25920000	1.07919	1.11852	1.09169	1.12307
shared A	1	25920001	25960000	1.06437	1.12512	1.11171	1.11586
shared A	1	25960001	26000000	1.08085	1.11402	1.11429	1.09227
shared A	1	26000001	26040000	1.08415	1.1371	1.11067	1.08406
shared A	1	26040001	26080000	1.09052	1.15693	1.13063	1.15831
shared A	1	26080001	26120000	1.12045	1.16948	1.14712	1.20452
shared A	1	26120001	26160000	1.14144	1.18618	1.17472	1.20842
shared A	1	26160001	26200000	1.14935	1.19645	1.20403	1.22898
shared A	1	26200001	26240000	1.15488	1.20848	1.22836	1.26087
shared A	1	26240001	26280000	1.15639	1.21602	1.2415	1.25545
shared A	1	26280001	26320000	1.13929	1.21511	1.22537	1.24602
shared A	1	26320001	26360000	1.13222	1.19956	1.18504	1.22364
shared A	1	26360001	26400000	1.12377	1.18095	1.18696	1.19035
shared A	1	26400001	26440000	1.12166	1.16895	1.17095	1.16293
shared A	1	26440001	26480000	1.14635	1.16758	1.1702	1.1477
shared A	1	26480001	26520000	1.16304	1.17095	1.13941	1.17476
shared A	1	26520001	26560000	1.14987	1.18872	1.12731	1.22126
shared A	1	26560001	26600000	1.1518	1.18959	1.14535	1.27357
shared A	1	26600001	26640000	1.17371	1.20606	1.18418	1.29915
shared A	1	26640001	26680000	1.18221	1.21591	1.19079	1.29997
shared A	1	26680001	26720000	1.18824	1.22926	1.22877	1.32166
shared A	1	26720001	26760000	1.18254	1.23439	1.21637	1.32481
shared A	1	26760001	26800000	1.17469	1.23378	1.22842	1.32473
shared A	1	26800001	26840000	1.17447	1.23875	1.23683	1.29136
shared A	1	26840001	26880000	1.14791	1.22911	1.23143	1.26483
shared A	1	26880001	26920000	1.13277	1.22378	1.21069	1.22969
shared A	1	26920001	26960000	1.14412	1.23608	1.18702	1.24023
shared A	1	26960001	27000000	1.14474	1.23895	1.18458	1.26918
shared A	1	27000001	27040000	1.11984	1.23397	1.18924	1.21749
shared A	1	27040001	27080000	1.13636	1.2358	1.21164	1.24153
shared A	1	27080001	27120000	1.14697	1.23306	1.20606	1.23384
shared A	1	27120001	27160000	1.15622	1.25014	1.23103	1.24338
shared A	1	27160001	27200000	1.17298	1.27939	1.23888	1.27369
shared A	1	27200001	27240000	1.18241	1.28505	1.25463	1.28861
shared A	1	27240001	27280000	1.18056	1.27587	1.25578	1.25686
shared A	1	27280001	27320000	1.21007	1.26772	1.27754	1.29106
shared A	1	27320001	27360000	1.21026	1.26018	1.26784	1.27259
shared A	1	27360001	27400000	1.20917	1.25186	1.25242	1.23007
shared A	1	27400001	27440000	1.20492	1.24544	1.23358	1.2414
shared A	1	27440001	27480000	1.20893	1.21642	1.23208	1.26612
shared A	1	27480001	27520000	1.2103	1.20295	1.22481	1.22378
shared A	1	27520001	27560000	1.21528	1.22082	1.22434	1.24255
shared A	1	27560001	27600000	1.20323	1.23512	1.21876	1.24843
shared A	1	27600001	27640000	1.17734	1.23805	1.21998	1.27856
shared A	1	27640001	27680000	1.18901	1.25319	1.21427	1.30281
shared A	1	27680001	27720000	1.20632	1.26957	1.24054	1.26776
shared A	1	27720001	27760000	1.20847	1.28078	1.24086	1.23931
shared A	1	27760001	27800000	1.20482	1.29358	1.23632	1.25148
shared A	1	27800001	27840000	1.20652	1.28649	1.24734	1.26152
shared A	1	27840001	27880000	1.20852	1.2916	1.27083	1.26395
shared A	1	27880001	27920000	1.21824	1.28423	1.26657	1.22865
shared A	1	27920001	27960000	1.23481	1.29205	1.26985	1.2249
shared A	1	27960001	28000000	1.25445	1.31025	1.28568	1.25835
shared A	1	28000001	28040000	1.26399	1.31796	1.26234	1.28088
shared A	1	28040001	28080000	1.27726	1.32134	1.26693	1.26532
shared A	1	28080001	28120000	1.29074	1.33442	1.26553	1.25977
shared A	1	28120001	28160000	1.29144	1.33589	1.26472	1.24826
shared A	1	28160001	28200000	1.28846	1.3319	1.27257	1.25401
shared A	1	28200001	28240000	1.2923	1.31381	1.27799	1.23928
shared A	1	28240001	28280000	1.27597	1.31057	1.26009	1.22657
shared A	1	28280001	28320000	1.2658	1.32464	1.26371	1.23861
shared A	1	28320001	28360000	1.27487	1.33353	1.26004	1.2442
shared A	1	28360001	28400000	1.27284	1.32505	1.26652	1.2184
shared A	1	28400001	28440000	1.28793	1.34218	1.24741	1.22383
shared A	1	28440001	28480000	1.30145	1.34261	1.23885	1.2136
shared A	1	28480001	28520000	1.29329	1.34508	1.22756	1.21797
shared A	1	28520001	28560000	1.29569	1.33283	1.22866	1.2266
shared A	1	28560001	28600000	1.30097	1.32027	1.22671	1.23873
shared A	1	28600001	28640000	1.29883	1.30582	1.20045	1.21644
shared A	1	28640001	28680000	1.29042	1.31285	1.17769	1.18075
shared A	1	28680001	28720000	1.2744	1.2941	1.16939	1.15912
shared A	1	28720001	28760000	1.26345	1.29558	1.16834	1.16156
shared A	1	28760001	28800000	1.25547	1.28186	1.17902	1.16843
shared A	1	28800001	28840000	1.24777	1.28344	1.15817	1.16457
shared A	1	28840001	28880000	1.24164	1.27367	1.14375	1.15471
shared A	1	28880001	28920000	1.21471	1.2511	1.14999	1.19461
shared A	1	28920001	28960000	1.19621	1.22322	1.1298	1.20142
shared A	1	28960001	29000000	1.16579	1.19464	1.09296	1.15986
shared A	1	29000001	29040000	1.11923	1.14245	1.04838	1.13157
shared A	1	29040001	29080000	1.07493	1.10011	0.952864	1.0948
shared A	1	29080001	29120000	1.01215	1.02186	0.890275	1.04344
shared A	1	29120001	29160000	0.946109	0.926683	0.824245	0.949226
shared A	1	29160001	29200000	0.896698	0.865117	0.706358	0.819859
shared A	1	29200001	29240000	0.820644	0.790762	0.577952	0.758178
shared A	1	29240001	29280000	0.777532	0.730647	0.512876	0.70244
shared A	1	29280001	29320000	0.744862	0.685388	0.479166	0.636797
shared A	1	29320001	29360000	0.713985	0.659302	0.447146	0.562589
shared A	1	29360001	29400000	0.691602	0.665977	0.41308	0.523183
shared A	1	29400001	29440000	0.595909	0.62973	0.337547	0.464999
shared A	1	29440001	29480000	0.361659	0.444692	0.236542	0.429744
shared B	1	29520001	29560000	-0.283564	-0.0184297	-0.132952	0.225077
shared B	1	29560001	29600000	-0.464329	-0.311002	-0.3648	0.102748
B-A	1	29600001	29640000	-0.827678	-0.67638	-0.563601	-0.00957679
B-A	1	29640001	29680000	-1.06192	-0.972334	-0.724487	-0.122322
B-A	1	29680001	29720000	-1.19721	-1.15732	-0.85971	-0.246709
B-A	1	29720001	29760000	-1.24684	-1.21933	-0.940459	-0.348172
B-A	1	29760001	29800000	-1.27007	-1.23836	-0.946596	-0.357661
B-A	1	29800001	29840000	-1.26265	-1.25424	-0.931635	-0.399781
B-A	1	29840001	29880000	-1.25397	-1.24628	-0.886513	-0.343574
B-A	1	30000001	30040000	-1.17684	-1.12726	-0.813734	-0.303457
B-A	1	30040001	30080000	-1.19418	-1.15586	-0.853185	-0.264398
B-A	1	30080001	30120000	-1.22678	-1.18491	-0.927425	-0.301592
B-A	1	30120001	30160000	-1.24847	-1.21772	-0.967375	-0.363307
B-A	1	30160001	30200000	-1.25889	-1.29488	-1.01094	-0.282963
B-A	1	30200001	30240000	-1.26514	-1.29196	-1.00618	-0.358252
B-A	1	30240001	30280000	-1.27067	-1.27409	-1.04797	-0.427053
B-A	1	30280001	30320000	-1.29156	-1.29123	-1.04144	-0.432813
B-A	1	30320001	30360000	-1.30663	-1.31467	-1.08753	-0.518919
B-A	1	30360001	30400000	-1.31397	-1.31917	-1.07016	-0.506451
B-A	1	30400001	30440000	-1.30269	-1.30509	-1.07457	-0.442231
B-A	1	30440001	30480000	-1.29665	-1.27186	-1.08545	-0.477563
B-A	1	30480001	30520000	-1.29754	-1.2674	-1.10494	-0.464205
B-A	1	30520001	30560000	-1.29859	-1.27356	-1.08791	-0.470179
B-A	1	30560001	30600000	-1.29549	-1.25721	-1.09568	-0.517305
B-A	1	30600001	30640000	-1.28679	-1.26698	-1.0718	-0.533262
shared B	1	30640001	30680000	-1.27639	-1.26783	-1.06404	-0.566632
shared B	1	30680001	30720000	-1.28216	-1.29143	-1.05672	-0.589282
shared B	1	30720001	30760000	-1.2655	-1.28771	-1.04674	-0.548285
B-A	1	30760001	30800000	-1.26096	-1.29909	-1.03821	-0.473425
B-A	1	30800001	30840000	-1.25054	-1.29355	-1.04416	-0.414383
B-A	1	30840001	30880000	-1.22899	-1.28391	-0.976895	-0.344278
B-A	1	30880001	30920000	-1.21732	-1.26689	-0.955832	-0.329091
B-A	1	30920001	30960000	-1.21072	-1.26631	-0.961135	-0.271997
B-A	1	30960001	31000000	-1.21104	-1.25942	-0.920773	-0.23208
B-A	1	31000001	31040000	-1.19376	-1.24259	-0.863175	-0.151333
B-A	1	31040001	31080000	-1.09413	-1.14629	-0.817448	-0.105871
B-A	1	31080001	31120000	-0.85602	-0.922498	-0.644469	-0.011974
B-A	1	31120001	31160000	-0.597151	-0.672056	-0.44595	0.149801
shared B	1	31160001	31200000	-0.282164	-0.33426	-0.199851	0.346106
shared A	1	31240001	31280000	0.341242	0.33722	0.215212	0.6074
shared A	1	31280001	31320000	0.606973	0.627201	0.431484	0.746796
shared A	1	31320001	31360000	0.810641	0.842398	0.631644	0.871621
shared A	1	31360001	31400000	0.941377	0.941781	0.746999	0.941072
shared A	1	31400001	31440000	1.0265	1.01663	0.851741	0.997873
shared A	1	31440001	31480000	1.0838	1.07325	0.914989	1.05343
shared A	1	31480001	31520000	1.13425	1.14693	1.00651	1.12384
shared A	1	31520001	31560000	1.19143	1.19453	1.09647	1.17577
shared A	1	31560001	31600000	1.21148	1.20834	1.15501	1.2151
shared A	1	31600001	31640000	1.22355	1.21101	1.18061	1.19606
shared A	1	31640001	31680000	1.22152	1.21788	1.19826	1.2359
shared A	1	31680001	31720000	1.24175	1.22242	1.21767	1.21254
shared A	1	31720001	31760000	1.25885	1.25029	1.22191	1.20795
shared A	1	31760001	31800000	1.26301	1.24457	1.23701	1.21303
shared A	1	31800001	31840000	1.2623	1.26837	1.19803	1.20063
shared A	1	31840001	31880000	1.26833	1.29096	1.18657	1.22598
shared A	1	31880001	31920000	1.27388	1.30592	1.19038	1.24315
shared A	1	31920001	31960000	1.28096	1.31612	1.18033	1.24728
shared A	1	31960001	32000000	1.28699	1.33516	1.1871	1.27637
shared A	1	32000001	32040000	1.28866	1.33344	1.21843	1.31119
shared A	1	32040001	32080000	1.29586	1.34686	1.22052	1.31986
shared A	1	32080001	32120000	1.30045	1.35631	1.24717	1.35191
shared A	1	32120001	32160000	1.31338	1.36379	1.25174	1.31841
shared A	1	32160001	32200000	1.31628	1.36521	1.26454	1.30648
shared A	1	32200001	32240000	1.31199	1.37637	1.25944	1.31762
shared A	1	32240001	32280000	1.30632	1.36765	1.25437	1.32387
shared A	1	32280001	32320000	1.30956	1.37693	1.26448	1.31728
shared A	1	32320001	32360000	1.31235	1.37807	1.27394	1.3152
shared A	1	32360001	32400000	1.31027	1.3778	1.26561	1.32329
shared A	1	32400001	32440000	1.31013	1.37276	1.27342	1.35152
shared A	1	32440001	32480000	1.31408	1.37765	1.28531	1.36927
shared A	1	32480001	32520000	1.31361	1.37493	1.28755	1.36915
shared A	1	32520001	32560000	1.32844	1.37957	1.30293	1.37447
shared A	1	32560001	32600000	1.32706	1.38983	1.30637	1.34817
shared A	1	32600001	32640000	1.32783	1.37935	1.30732	1.36423
shared A	1	32640001	32680000	1.33336	1.3779	1.31929	1.37036
shared A	1	32680001	32720000	1.32612	1.3743	1.32447	1.3501
shared A	1	32720001	32760000	1.3168	1.35913	1.30258	1.36608
shared A	1	32760001	32800000	1.30545	1.35439	1.29403	1.34743
shared A	1	32800001	32840000	1.30051	1.34689	1.28363	1.32744
shared A	1	32840001	32880000	1.30727	1.32693	1.26875	1.31979
shared A	1	32880001	32920000	1.31216	1.32773	1.23551	1.27689
shared A	1	32920001	32960000	1.30692	1.33002	1.21217	1.26372
shared A	1	32960001	33000000	1.30507	1.3122	1.20958	1.23362
shared A	1	33000001	33040000	1.3077	1.32426	1.22517	1.22348
shared A	1	33040001	33080000	1.30308	1.31604	1.24519	1.23917
shared A	1	33080001	33120000	1.29966	1.30841	1.22931	1.18498
shared A	1	33120001	33160000	1.30823	1.31652	1.24813	1.19992
shared A	1	33160001	33200000	1.30562	1.32167	1.26957	1.21945
shared A	1	33200001	33240000	1.28978	1.31197	1.24278	1.23744
shared A	1	33240001	33280000	1.2744	1.30068	1.20796	1.24886
shared A	1	33280001	33320000	1.24258	1.26744	1.1654	1.20726
shared A	1	33320001	33360000	1.20924	1.24264	1.15678	1.15433
shared A	1	33360001	33400000	1.17491	1.20722	1.09081	1.15443
shared A	1	33400001	33440000	1.13106	1.17264	1.03534	1.10425
shared A	1	33440001	33480000	1.09258	1.11453	0.958407	1.07072
shared A	1	33480001	33520000	1.02675	1.0567	0.904313	0.978413
shared A	1	33520001	33560000	0.950377	0.974152	0.822203	0.883695
shared A	1	33560001	33600000	0.889182	0.898689	0.745859	0.841389
shared A	1	33600001	33640000	0.803133	0.799789	0.604333	0.778442
shared A	1	33640001	33680000	0.705094	0.693732	0.531347	0.657673
shared A	1	33680001	33720000	0.621123	0.606807	0.449792	0.495749
shared A	1	33720001	33760000	0.578058	0.585507	0.392926	0.468085
shared A	1	33760001	33800000	0.562524	0.54568	0.352676	0.413879
shared A	1	33800001	33840000	0.484964	0.456246	0.311425	0.302182
shared A	1	33840001	33880000	0.285397	0.264552	0.179536	0.108976
shared B	1	33920001	33960000	-0.203481	-0.245023	-0.156284	-0.157486
shared B	1	33960001	34000000	-0.465976	-0.497607	-0.359306	-0.267124
shared B	1	34000001	34040000	-0.770761	-0.756035	-0.584073	-0.444929
shared B	1	34040001	34080000	-0.980967	-0.97103	-0.781661	-0.602659
shared B	1	34080001	34120000	-1.09456	-1.06292	-0.910914	-0.693522
shared B	1	34120001	34160000	-1.14238	-1.09082	-0.989825	-0.749357
shared B	1	34160001	34200000	-1.16961	-1.08803	-0.993696	-0.788235
shared B	1	34200001	34240000	-1.16752	-1.09248	-0.970725	-0.79403
shared B	1	34240001	34280000	-1.17398	-1.07437	-0.96687	-0.778353
shared B	1	34280001	34320000	-1.16796	-1.05299	-0.916063	-0.78881
shared B	1	34320001	34360000	-1.17419	-1.04044	-0.906392	-0.809038
shared B	1	34360001	34400000	-1.17026	-1.04724	-0.898432	-0.818838
shared B	1	34400001	34440000	-1.14975	-1.06315	-0.869305	-0.77755
shared B	1	34440001	34480000	-1.15563	-1.08327	-0.894708	-0.778457
shared B	1	34480001	34520000	-1.16868	-1.10457	-0.919749	-0.842232
shared B	1	34520001	34560000	-1.22156	-1.15169	-0.988736	-0.868934
shared B	1	34560001	34600000	-1.25039	-1.21244	-1.08493	-0.906558
shared B	1	34600001	34640000	-1.25553	-1.24033	-1.10996	-0.950276
shared B	1	34640001	34680000	-1.2726	-1.2651	-1.16159	-1.02658
shared B	1	34680001	34720000	-1.28753	-1.30023	-1.22879	-1.07304
shared B	1	34720001	34760000	-1.29583	-1.31589	-1.25782	-1.10536
shared B	1	34760001	34800000	-1.31279	-1.34047	-1.28023	-1.13166
shared B	1	34800001	34840000	-1.32116	-1.3436	-1.30543	-1.19403
shared B	1	34840001	34880000	-1.32208	-1.34147	-1.30497	-1.21683
shared B	1	34880001	34920000	-1.32754	-1.33431	-1.31495	-1.22487
shared B	1	34920001	34960000	-1.32921	-1.34078	-1.31143	-1.18173
shared B	1	34960001	35000000	-1.324	-1.33341	-1.30053	-1.17088
shared B	1	35000001	35040000	-1.3318	-1.33764	-1.27699	-1.17947
shared B	1	35040001	35080000	-1.32683	-1.34774	-1.2638	-1.12473
shared B	1	35080001	35120000	-1.31676	-1.33492	-1.18494	-1.00511
shared B	1	35120001	35160000	-1.29186	-1.30365	-1.09799	-0.862503
shared B	1	35160001	35200000	-1.25303	-1.24284	-0.986556	-0.698247
shared B	1	35200001	35240000	-1.18552	-1.17893	-0.8854	-0.579991
shared B	1	35240001	35280000	-1.13934	-1.09063	-0.747555	-0.412661
B-A	1	35280001	35320000	-1.03856	-0.982402	-0.586871	-0.220158
B-A	1	35320001	35360000	-0.915542	-0.815594	-0.370117	-0.0705963
B-A	1	35360001	35400000	-0.731475	-0.623602	-0.152207	0.0842803
B-A	1	35400001	35440000	-0.584738	-0.50843	-0.0252228	0.215523
shared B	1	35440001	35480000	-0.417556	-0.388438	0.131107	0.280024
shared B	1	35480001	35520000	-0.278009	-0.293309	0.239451	0.368613
shared A	1	35600001	35640000	0.288017	0.138626	0.547031	0.541279
shared A	1	35640001	35680000	0.394098	0.198006	0.563334	0.571458
shared A	1	35680001	35720000	0.53405	0.321659	0.604868	0.577536
shared A	1	35720001	35760000	0.647637	0.417258	0.64983	0.649996
shared A	1	35760001	35800000	0.765311	0.538165	0.744756	0.68572
shared A	1	35800001	35840000	0.823385	0.578169	0.767347	0.732445
shared A	1	35840001	35880000	0.874934	0.671762	0.789668	0.75595
shared A	1	35880001	35920000	0.909047	0.724538	0.820685	0.76392
shared A	1	35920001	35960000	0.940737	0.771717	0.873971	0.830251
shared A	1	35960001	36000000	0.940716	0.785369	0.887443	0.910122
shared A	1	36000001	36040000	0.899461	0.735687	0.891979	0.948114
shared A	1	36040001	36080000	0.869665	0.707867	0.893441	0.983667
shared A	1	36080001	36120000	0.858822	0.730448	0.890591	0.944904
shared A	1	36120001	36160000	0.819062	0.726693	0.868059	0.932625
shared A	1	36160001	36200000	0.831889	0.774698	0.854707	0.933403
shared A	1	36200001	36240000	0.846509	0.784228	0.867044	0.880791
shared A	1	36240001	36280000	0.876841	0.80293	0.87166	0.840605
shared A	1	36280001	36320000	0.925648	0.855452	0.864354	0.784037
shared A	1	36320001	36360000	0.956843	0.890615	0.862786	0.704852
shared A	1	36360001	36400000	0.974453	0.87166	0.855748	0.69463
shared A	1	36400001	36440000	0.986708	0.888906	0.861416	0.735058
shared A	1	36440001	36480000	0.976088	0.908711	0.848716	0.765981
shared A	1	36480001	36520000	0.990512	0.931248	0.811892	0.806078
shared A	1	36520001	36560000	0.996259	0.967445	0.792504	0.792241
shared A	1	36560001	36600000	1.00306	1.00002	0.780213	0.820118
shared A	1	36600001	36640000	1.02199	1.01619	0.768435	0.855912
shared A	1	36640001	36680000	0.998856	1.02638	0.759545	0.886646
shared A	1	36680001	36720000	0.954515	1.00355	0.71277	0.842862
shared A	1	36720001	36760000	0.909651	0.966119	0.675565	0.814802
shared A	1	36760001	36800000	0.809604	0.880367	0.587256	0.707655
shared A	1	36800001	36840000	0.54158	0.640515	0.356419	0.574803
shared B	1	36880001	36920000	-0.229807	-0.184201	-0.23794	0.136885
shared B	1	36920001	36960000	-0.582189	-0.537727	-0.48046	-0.140862
shared B	1	36960001	37000000	-0.894918	-0.828902	-0.710851	-0.395857
shared B	1	37000001	37040000	-1.10691	-1.04169	-0.931327	-0.698783
shared B	1	37040001	37080000	-1.22477	-1.16814	-1.07821	-0.865641
shared B	1	37080001	37120000	-1.26491	-1.22256	-1.13829	-0.949627
shared B	1	37120001	37160000	-1.26818	-1.24365	-1.16133	-1.03048
shared B	1	37160001	37200000	-1.28072	-1.2546	-1.19454	-1.04794
shared B	1	37200001	37240000	-1.27491	-1.2637	-1.214	-1.04596
shared B	1	37240001	37280000	-1.26912	-1.28416	-1.22191	-1.09203
shared B	1	37280001	37320000	-1.26527	-1.27316	-1.22678	-1.06633
shared B	1	37320001	37360000	-1.26618	-1.27264	-1.23653	-1.02606
shared B	1	37360001	37400000	-1.26662	-1.27265	-1.24101	-1.06599
shared B	1	37400001	37440000	-1.26867	-1.26181	-1.26067	-1.05856
shared B	1	37440001	37480000	-1.26429	-1.26235	-1.25634	-1.06975
shared B	1	37480001	37520000	-1.2679	-1.25895	-1.25527	-1.14584
shared B	1	37520001	37560000	-1.27475	-1.24656	-1.27084	-1.15841
shared B	1	37560001	37600000	-1.2813	-1.2571	-1.2796	-1.16022
shared B	1	37600001	37640000	-1.28784	-1.26516	-1.28496	-1.17508
shared B	1	37640001	37680000	-1.29503	-1.26061	-1.3055	-1.1818
shared B	1	37680001	37720000	-1.28912	-1.2823	-1.28347	-1.17786
shared B	1	37720001	37760000	-1.29384	-1.27882	-1.28089	-1.13286
shared B	1	37760001	37800000	-1.28795	-1.26061	-1.27816	-1.05435
shared B	1	37800001	37840000	-1.23266	-1.18347	-1.218	-0.931638
shared B	1	37840001	37880000	-1.15317	-1.07866	-1.10214	-0.79173
shared B	1	37880001	37920000	-1.00732	-0.940488	-0.989397	-0.600885
shared B	1	37920001	37960000	-0.868564	-0.839542	-0.825521	-0.450358
shared B	1	37960001	38000000	-0.745353	-0.754486	-0.691525	-0.299806
shared B	1	38000001	38040000	-0.601772	-0.656546	-0.558905	-0.156068
shared B	1	38040001	38080000	-0.50396	-0.561228	-0.417959	-0.0275203
shared B	1	38080001	38120000	-0.533107	-0.636414	-0.438367	0.0274531
shared B	1	38120001	38160000	-0.535181	-0.69065	-0.448711	-0.0370304
shared B	1	38160001	38200000	-0.529542	-0.69327	-0.40517	-0.030795
shared B	1	38200001	38240000	-0.441445	-0.586911	-0.359253	0.00107213
shared B	1	38240001	38280000	-0.325439	-0.407737	-0.288355	0.0412263
shared B	1	38280001	38320000	-0.202824	-0.224726	-0.218106	0.0786638
shared B	1	38400001	38440000	-0.30454	-0.314317	-0.327321	0.00552567
shared B	1	38440001	38480000	-0.548864	-0.552874	-0.505051	-0.179733
shared B	1	38480001	38520000	-0.7865	-0.791401	-0.688558	-0.372899
shared B	1	38520001	38560000	-0.982068	-1.00344	-0.878097	-0.550214
shared B	1	38560001	38600000	-1.14919	-1.16097	-1.04183	-0.710178
shared B	1	38600001	38640000	-1.25588	-1.26854	-1.13625	-0.84473
shared B	1	38640001	38680000	-1.30406	-1.30784	-1.20393	-0.952257
shared B	1	38680001	38720000	-1.31094	-1.32706	-1.24573	-1.04849
shared B	1	38720001	38760000	-1.31614	-1.33394	-1.25705	-1.15118
shared B	1	38760001	38800000	-1.32156	-1.3378	-1.27338	-1.20388
shared B	1	38800001	38840000	-1.32918	-1.32773	-1.30489	-1.21686
shared B	1	38840001	38880000	-1.32885	-1.34593	-1.3294	-1.23158
shared B	1	38880001	38920000	-1.3287	-1.34462	-1.32223	-1.24868
shared B	1	38920001	38960000	-1.33136	-1.33857	-1.31298	-1.23635
shared B	1	38960001	39000000	-1.32691	-1.34009	-1.32198	-1.22685
shared B	1	39000001	39040000	-1.32946	-1.33381	-1.30807	-1.20429
shared B	1	39040001	39080000	-1.32546	-1.32704	-1.2993	-1.17933
shared B	1	39080001	39120000	-1.31681	-1.34202	-1.31797	-1.1597
shared B	1	39120001	39160000	-1.31176	-1.31979	-1.29971	-1.15081
shared B	1	39160001	39200000	-1.28723	-1.28326	-1.28148	-1.1067
shared B	1	39200001	39240000	-1.20502	-1.21495	-1.18358	-0.981458
shared B	1	39240001	39280000	-1.09192	-1.1102	-1.06608	-0.795902
shared B	1	39280001	39320000	-0.938064	-0.947489	-0.904921	-0.534609
shared B	1	39320001	39360000	-0.659654	-0.69881	-0.664433	-0.275348
shared B	1	39360001	39400000	-0.230552	-0.334277	-0.344535	-0.0254038
shared A	1	39440001	39480000	0.502887	0.356134	0.173325	0.49112
shared A	1	39480001	39520000	0.664148	0.56311	0.310514	0.671843
shared A	1	39520001	39560000	0.806463	0.786069	0.500133	0.777685
shared A	1	39560001	39600000	0.945296	0.943578	0.667072	0.838546
shared A	1	39600001	39640000	1.042	1.06378	0.802906	0.914243
shared A	1	39640001	39680000	1.10032	1.14585	0.913076	0.944578
shared A	1	39680001	39720000	1.1551	1.19048	0.960057	0.983164
shared A	1	39720001	39760000	1.16717	1.20496	0.987805	1.02325
shared A	1	39760001	39800000	1.1879	1.2109	1.01126	1.05155
shared A	1	39800001	39840000	1.19195	1.22625	1.03502	1.08384
shared A	1	39840001	39880000	1.19868	1.21832	1.02892	1.13621
shared A	1	39880001	39920000	1.17999	1.20497	1.02485	1.13791
shared A	1	39920001	39960000	1.17485	1.19565	1.055	1.16709
shared A	1	39960001	40000000	1.16534	1.21599	1.08234	1.19007
shared A	1	40000001	40040000	1.15872	1.2005	1.06584	1.2013
shared A	1	40040001	40080000	1.13627	1.19932	1.09026	1.19783
shared A	1	40080001	40120000	1.13403	1.18774	1.11644	1.2253
shared A	1	40120001	40160000	1.12913	1.2082	1.15721	1.22641
shared A	1	40160001	40200000	1.14478	1.23151	1.18555	1.26741
shared A	1	40200001	40240000	1.17946	1.24526	1.1822	1.26993
shared A	1	40240001	40280000	1.17538	1.25195	1.19896	1.24389
shared A	1	40280001	40320000	1.18531	1.26977	1.2313	1.23794
shared A	1	40320001	40360000	1.20668	1.2827	1.23739	1.27507
shared A	1	40360001	40400000	1.21303	1.2958	1.25144	1.25615
shared A	1	40400001	40440000	1.21628	1.28352	1.26346	1.28012
shared A	1	40440001	40480000	1.18652	1.26297	1.26277	1.25463
shared A	1	40480001	40520000	1.14394	1.23298	1.26682	1.25277
shared A	1	40520001	40560000	1.12143	1.22746	1.23888	1.27789
shared A	1	40560001	40600000	1.09769	1.20583	1.23564	1.2558
shared A	1	40600001	40640000	1.07785	1.19511	1.25373	1.24361
shared A	1	40640001	40680000	1.01115	1.16286	1.24009	1.18591
shared A	1	40680001	40720000	0.962401	1.14364	1.20255	1.19791
shared A	1	40720001	40760000	0.973733	1.14314	1.20508	1.19138
shared A	1	40760001	40800000	0.962721	1.13953	1.20829	1.17603
shared A	1	40800001	40840000	0.879845	1.08823	1.22272	1.16409
shared A	1	40840001	40880000	0.746631	1.03304	1.22373	1.13935
shared A	1	40880001	40920000	0.616041	0.943858	1.17551	1.11347
shared A	1	40920001	40960000	0.540073	0.878586	1.14241	1.0701
B-A	1	40960001	41000000	0.407303	0.797626	1.16725	1.05028
B-A	1	41000001	41040000	0.329472	0.727897	1.16176	1.02304
B-A	1	41040001	41080000	0.318594	0.787175	1.16858	1.02353
B-A	1	41080001	41120000	0.414871	0.811527	1.18528	1.03657
shared A	1	41120001	41160000	0.500938	0.833644	1.1929	1.07482
shared A	1	41160001	41200000	0.552884	0.903298	1.22378	1.09725
shared A	1	41200001	41240000	0.648889	0.949048	1.25601	1.14969
shared A	1	41240001	41280000	0.70052	0.985326	1.24985	1.1816
shared A	1	41280001	41320000	0.724764	1.04398	1.2529	1.16515
shared A	1	41320001	41360000	0.7086	1.04161	1.24322	1.22446
shared A	1	41360001	41400000	0.65172	1.01624	1.21988	1.19579
shared A	1	41400001	41440000	0.587949	0.991756	1.18787	1.15515
shared A	1	41440001	41480000	0.541363	0.939884	1.16522	1.07125
shared A	1	41480001	41520000	0.439966	0.846989	1.11298	1.00849
shared A	1	41520001	41560000	0.353125	0.745101	1.06631	0.90007
shared A	1	41560001	41600000	0.293601	0.627321	1.01685	0.802663
B-A	1	41600001	41640000	0.175641	0.445068	0.959414	0.644736
B-A	1	41640001	41680000	0.0524574	0.253405	0.928636	0.589825
B-A	1	41680001	41720000	-0.000603027	0.133878	0.979359	0.617145
B-A	1	41720001	41760000	-0.0361654	0.0399135	0.925042	0.68368
B-A	1	41760001	41800000	-0.0833344	-0.00547092	0.94115	0.685708
B-A	1	41800001	41840000	-0.0845457	0.00386637	0.928157	0.720237
B-A	1	41840001	41880000	-0.114012	-0.0222596	0.912809	0.677593
B-A	1	41880001	41920000	-0.198152	-0.0857257	0.878007	0.702524
B-A	1	41920001	41960000	-0.220186	-0.115229	0.824079	0.685689
B-A	1	41960001	42000000	-0.263355	-0.110359	0.753985	0.639457
B-A	1	42000001	42040000	-0.291544	-0.133495	0.74882	0.645043
B-A	1	42040001	42080000	-0.332754	-0.17964	0.712024	0.656406
B-A	1	42080001	42120000	-0.374635	-0.209557	0.659487	0.623033
B-A	1	42120001	42160000	-0.435272	-0.255947	0.625613	0.729571
B-A	1	42160001	42200000	-0.427614	-0.232072	0.603262	0.716157
B-A	1	42200001	42240000	-0.42015	-0.221423	0.592101	0.683678
B-A	1	42240001	42280000	-0.434166	-0.280524	0.578906	0.646027
B-A	1	42280001	42320000	-0.563176	-0.387462	0.525921	0.519204
B-A	1	42320001	42360000	-0.654663	-0.489713	0.430479	0.447095
B-A	1	42360001	42400000	-0.764259	-0.631024	0.369198	0.425991
B-A	1	42400001	42440000	-0.86684	-0.779069	0.241863	0.311933
B-A	1	42440001	42480000	-0.964028	-0.925111	0.190841	0.299563
B-A	1	42480001	42520000	-1.06857	-1.03382	0.139784	0.3185
B-A	1	42520001	42560000	-1.10268	-1.05645	0.0959799	0.304414
B-A	1	42560001	42600000	-1.08767	-1.04092	0.123206	0.32874
B-A	1	42600001	42640000	-1.04442	-1.02289	0.115982	0.366926
B-A	1	42640001	42680000	-1.02339	-0.96795	0.16499	0.329275
B-A	1	42680001	42720000	-1.04802	-0.992884	0.206746	0.413775
B-A	1	42720001	42760000	-1.06203	-0.996346	0.169757	0.45142
B-A	1	42760001	42800000	-1.07096	-1.03764	0.167914	0.402942
B-A	1	42800001	42840000	-1.10229	-1.0882	0.131915	0.44546
B-A	1	42840001	42880000	-1.16724	-1.15096	0.0211575	0.412981
B-A	1	42880001	42920000	-1.22314	-1.20219	-0.0195324	0.367262
B-A	1	42920001	42960000	-1.25625	-1.26642	-0.068207	0.335013
B-A	1	42960001	43000000	-1.25673	-1.26567	-0.0687443	0.284098
B-A	1	43000001	43040000	-1.22736	-1.21194	0.0104179	0.318573
B-A	1	43040001	43080000	-1.1443	-1.13571	0.0974391	0.376673
B-A	1	43080001	43120000	-1.02807	-1.05339	0.234391	0.39013
B-A	1	43120001	43160000	-0.833437	-0.904185	0.454176	0.464527
B-A	1	43160001	43200000	-0.57624	-0.70482	0.626666	0.604287
B-A	1	43200001	43240000	-0.31105	-0.493904	0.76548	0.708483
B-A	1	43240001	43280000	-0.00257362	-0.245065	0.868556	0.818201
B-A	1	43280001	43320000	0.278329	-0.0556898	0.953972	0.919602
B-A	1	43320001	43360000	0.452267	0.0735101	0.99991	0.949085
B-A	1	43360001	43400000	0.548604	0.13665	1.02545	1.0046
B-A	1	43400001	43440000	0.578668	0.152833	1.04497	1.01515
B-A	1	43440001	43480000	0.553966	0.157376	1.03852	0.983272
B-A	1	43480001	43520000	0.60697	0.263898	1.03698	1.04121
shared A	1	43520001	43560000	0.690366	0.37102	1.08972	1.08972
shared A	1	43560001	43600000	0.738009	0.425978	1.08412	1.05427
shared A	1	43600001	43640000	0.806073	0.547487	1.12598	1.06525
shared A	1	43640001	43680000	0.879402	0.643292	1.15762	1.09732
shared A	1	43680001	43720000	0.959303	0.753033	1.18159	1.15407
shared A	1	43720001	43760000	1.0362	0.888367	1.2103	1.23808
shared A	1	43760001	43800000	1.1177	0.988915	1.25514	1.25619
shared A	1	43800001	43840000	1.16095	1.07422	1.26951	1.27896
shared A	1	43840001	43880000	1.18787	1.13509	1.27378	1.30723
shared A	1	43880001	43920000	1.2163	1.18152	1.2746	1.32982
shared A	1	43920001	43960000	1.24914	1.2005	1.29801	1.32835
shared A	1	43960001	44000000	1.25098	1.22805	1.29518	1.31338
shared A	1	44000001	44040000	1.25645	1.24358	1.27955	1.31248
shared A	1	44040001	44080000	1.27208	1.25086	1.28322	1.28919
shared A	1	44080001	44120000	1.26975	1.24001	1.2806	1.28146
shared A	1	44120001	44160000	1.26886	1.24616	1.26744	1.30637
shared A	1	44160001	44200000	1.25944	1.26849	1.27359	1.33663
shared A	1	44200001	44240000	1.25897	1.27356	1.26408	1.29207
shared A	1	44240001	44280000	1.2682	1.27507	1.25843	1.3269
shared A	1	44280001	44320000	1.26236	1.2688	1.26513	1.33491
shared A	1	44320001	44360000	1.24498	1.24791	1.26087	1.37863
shared A	1	44360001	44400000	1.21829	1.22565	1.26607	1.38078
shared A	1	44400001	44440000	1.18312	1.16066	1.24617	1.34752
shared A	1	44440001	44480000	1.09865	1.07089	1.20687	1.3212
shared A	1	44480001	44520000	0.939211	0.921928	1.17055	1.29094
shared A	1	44520001	44560000	0.745291	0.754965	1.13512	1.24317
shared A	1	44560001	44600000	0.558274	0.560434	1.09435	1.18234
B-A	1	44600001	44640000	0.323971	0.38406	1.05323	1.10133
B-A	1	44640001	44680000	0.161099	0.261687	1.0265	1.07672
B-A	1	44680001	44720000	0.0624195	0.224636	1.00226	1.04276
B-A	1	44720001	44760000	-0.000210424	0.193462	1.00747	1.03565
B-A	1	44760001	44800000	-0.102438	0.11126	0.981147	1.02243
B-A	1	44800001	44840000	-0.187671	0.0679726	0.961293	1.00554
B-A	1	44840001	44880000	-0.3005	-0.0308987	0.947769	0.927716
B-A	1	44880001	44920000	-0.434433	-0.12917	0.917601	0.934798
B-A	1	44920001	44960000	-0.485216	-0.187394	0.912432	0.879987
B-A	1	44960001	45000000	-0.419349	-0.149953	0.933169	0.930796
B-A	1	45000001	45040000	-0.30196	-0.0283894	0.963874	0.991364
B-A	1	45040001	45080000	-0.0570528	0.179618	1.06397	1.10319
B-A	1	45080001	45120000	0.183966	0.45707	1.11645	1.1699
B-A	1	45120001	45160000	0.409969	0.70147	1.13544	1.23875
shared A	1	45160001	45200000	0.617206	0.847021	1.12628	1.27552
shared A	1	45200001	45240000	0.729649	0.887005	1.13626	1.24161
shared A	1	45240001	45280000	0.775895	0.904201	1.10971	1.20479
shared A	1	45280001	45320000	0.837179	0.931647	1.06008	1.1882
shared A	1	45320001	45360000	0.815839	0.906191	1.02163	1.16239
shared A	1	45360001	45400000	0.627081	0.742809	0.945216	1.06552
shared A	1	45400001	45440000	0.334515	0.47659	0.897778	0.973456
B-A	1	45440001	45480000	0.0656677	0.220134	0.823392	0.847112
B-A	1	45480001	45520000	-0.196424	0.00504657	0.686522	0.776707
B-A	1	45520001	45560000	-0.44112	-0.169413	0.593594	0.679019
B-A	1	45560001	45600000	-0.622196	-0.349447	0.566558	0.676135
B-A	1	45600001	45640000	-0.754636	-0.424834	0.554772	0.641603
B-A	1	45640001	45680000	-0.701379	-0.302358	0.620026	0.685691
B-A	1	45680001	45720000	-0.496833	-0.0999037	0.661244	0.78696
B-A	1	45720001	45760000	-0.29818	0.052037	0.739005	0.855995
B-A	1	45760001	45800000	-0.115481	0.256095	0.809397	0.878168
B-A	1	45800001	45840000	0.095488	0.342106	0.888	0.961506
shared A	1	45840001	45880000	0.325056	0.553608	0.983619	1.03276
shared A	1	45880001	45920000	0.569952	0.715111	1.04919	1.06889
shared A	1	45920001	45960000	0.748265	0.861078	1.08377	1.11462
shared A	1	45960001	46000000	0.889582	0.989693	1.11317	1.11138
shared A	1	46000001	46040000	1.02459	1.11443	1.15903	1.2138
shared A	1	46040001	46080000	1.12007	1.19283	1.21832	1.27444
shared A	1	46080001	46120000	1.18814	1.26615	1.23269	1.28898
shared A	1	46120001	46160000	1.21616	1.2829	1.2313	1.26989
shared A	1	46160001	46200000	1.22501	1.28665	1.20529	1.29342
shared A	1	46200001	46240000	1.23911	1.28008	1.21769	1.2787
shared A	1	46240001	46280000	1.23242	1.27684	1.21359	1.25994
shared A	1	46280001	46320000	1.22847	1.27297	1.2188	1.2457
shared A	1	46320001	46360000	1.22559	1.2626	1.20969	1.23696
shared A	1	46360001	46400000	1.22619	1.24644	1.19645	1.20566
shared A	1	46400001	46440000	1.21886	1.23433	1.17218	1.22933
shared A	1	46440001	46480000	1.20868	1.21335	1.17721	1.2119
shared A	1	46480001	46520000	1.20824	1.20692	1.18304	1.20129
shared A	1	46520001	46560000	1.21547	1.19703	1.20239	1.22987
shared A	1	46560001	46600000	1.21889	1.19907	1.19161	1.23121
shared A	1	46600001	46640000	1.21833	1.19903	1.20489	1.24557
shared A	1	46640001	46680000	1.20422	1.19663	1.20296	1.26548
shared A	1	46680001	46720000	1.16985	1.14444	1.18065	1.21107
shared A	1	46720001	46760000	1.10877	1.05828	1.11649	1.16184
shared A	1	46760001	46800000	1.00935	0.932195	1.00358	1.07875
shared A	1	46800001	46840000	0.896854	0.803023	0.874288	0.94624
shared A	1	46840001	46880000	0.77777	0.656733	0.764785	0.799653
shared A	1	46880001	46920000	0.616918	0.475042	0.638901	0.68076
shared A	1	46920001	46960000	0.489065	0.3061	0.482729	0.55655
shared A	1	46960001	47000000	0.329492	0.156093	0.337292	0.42406
shared A	1	47000001	47040000	0.21829	0.0729764	0.194805	0.293416
shared B	1	47080001	47120000	-0.281385	-0.308905	-0.221343	-0.0872074
shared B	1	47120001	47160000	-0.602982	-0.61207	-0.524131	-0.296199
shared B	1	47160001	47200000	-0.815945	-0.861811	-0.798233	-0.541935
shared B	1	47200001	47240000	-1.01208	-1.0413	-1.00626	-0.829013
shared B	1	47240001	47280000	-1.15546	-1.17106	-1.18149	-1.05381
shared B	1	47280001	47320000	-1.24425	-1.28303	-1.30164	-1.22165
shared B	1	47320001	47360000	-1.28437	-1.3275	-1.35392	-1.30487
shared B	1	47360001	47400000	-1.29191	-1.31861	-1.35395	-1.39748
shared B	1	47400001	47440000	-1.27913	-1.30655	-1.37015	-1.39974
shared B	1	47440001	47480000	-1.28305	-1.30056	-1.36442	-1.37338
shared B	1	47480001	47520000	-1.29242	-1.28848	-1.36369	-1.33728
shared B	1	47520001	47560000	-1.25674	-1.24612	-1.33819	-1.29854
shared B	1	47560001	47600000	-1.21494	-1.16643	-1.27379	-1.17883
shared B	1	47600001	47640000	-1.14114	-1.06323	-1.17707	-1.07275
shared B	1	47640001	47680000	-1.01356	-0.93951	-1.0383	-0.865919
shared B	1	47680001	47720000	-0.897516	-0.801059	-0.907766	-0.700261
shared B	1	47720001	47760000	-0.778836	-0.653588	-0.804527	-0.659712
shared B	1	47760001	47800000	-0.697787	-0.566282	-0.722119	-0.599715
shared B	1	47800001	47840000	-0.750141	-0.606846	-0.778145	-0.579169
shared B	1	47840001	47880000	-0.811756	-0.683951	-0.864681	-0.605953
shared B	1	47880001	47920000	-0.896853	-0.776617	-0.923954	-0.648905
shared B	1	47920001	47960000	-1.02071	-0.899854	-1.00386	-0.761958
shared B	1	47960001	48000000	-1.11692	-1.01957	-1.08746	-0.757984
shared B	1	48000001	48040000	-1.17692	-1.11448	-1.13386	-0.790987
shared B	1	48040001	48080000	-1.20138	-1.13046	-1.15787	-0.849592
shared B	1	48080001	48120000	-1.19955	-1.13821	-1.17288	-0.85766
shared B	1	48120001	48160000	-1.21152	-1.14563	-1.1763	-0.865015
shared B	1	48160001	48200000	-1.21839	-1.17363	-1.18779	-0.917003
shared B	1	48200001	48240000	-1.23367	-1.19307	-1.22182	-0.929168
shared B	1	48240001	48280000	-1.24384	-1.18927	-1.237	-0.981456
shared B	1	48280001	48320000	-1.23472	-1.20395	-1.24148	-1.0013
shared B	1	48320001	48360000	-1.25082	-1.23529	-1.25895	-1.0271
shared B	1	48360001	48400000	-1.26271	-1.23752	-1.24907	-1.0567
shared B	1	48400001	48440000	-1.26301	-1.23581	-1.24764	-1.09691
shared B	1	48440001	48480000	-1.26873	-1.23999	-1.27757	-1.1291
shared B	1	48480001	48520000	-1.26365	-1.24712	-1.28944	-1.2388
shared B	1	48520001	48560000	-1.24417	-1.23477	-1.28972	-1.28741
shared B	1	48560001	48600000	-1.25744	-1.2362	-1.30545	-1.34356
shared B	1	48600001	48640000	-1.25511	-1.23189	-1.32255	-1.37628
shared B	1	48640001	48680000	-1.24706	-1.23046	-1.32513	-1.41168
shared B	1	48680001	48720000	-1.24798	-1.23228	-1.31083	-1.44318
shared B	1	48720001	48760000	-1.22929	-1.22919	-1.29965	-1.45003
shared B	1	48760001	48800000	-1.20756	-1.19155	-1.28275	-1.40012
shared B	1	48800001	48840000	-1.17308	-1.16593	-1.25418	-1.37698
shared B	1	48840001	48880000	-1.15941	-1.16102	-1.24698	-1.36488
shared B	1	48880001	48920000	-1.16454	-1.17339	-1.24416	-1.35301
shared B	1	48920001	48960000	-1.18425	-1.17912	-1.24475	-1.32892
shared B	1	48960001	49000000	-1.18659	-1.18811	-1.27379	-1.31226
shared B	1	49000001	49040000	-1.20391	-1.16965	-1.28637	-1.3079
shared B	1	49040001	49080000	-1.21193	-1.18603	-1.28479	-1.28605
shared B	1	49080001	49120000	-1.2333	-1.22568	-1.30906	-1.3215
shared B	1	49120001	49160000	-1.24122	-1.22586	-1.32202	-1.3334
shared B	1	49160001	49200000	-1.23886	-1.22763	-1.33015	-1.31804
shared B	1	49200001	49240000	-1.23583	-1.22341	-1.33456	-1.30191
shared B	1	49240001	49280000	-1.23298	-1.21569	-1.30785	-1.31908
shared B	1	49280001	49320000	-1.24409	-1.23453	-1.31766	-1.31383
shared B	1	49320001	49360000	-1.23745	-1.25141	-1.30781	-1.33791
shared B	1	49360001	49400000	-1.2405	-1.24461	-1.31423	-1.38227
shared B	1	49400001	49440000	-1.23886	-1.21955	-1.29957	-1.394
shared B	1	49440001	49480000	-1.23998	-1.21482	-1.2905	-1.40909
shared B	1	49480001	49520000	-1.23662	-1.23292	-1.29454	-1.43304
shared B	1	49520001	49560000	-1.24113	-1.24557	-1.3185	-1.46192
shared B	1	49560001	49600000	-1.24287	-1.25907	-1.32344	-1.49949
shared B	1	49600001	49640000	-1.24176	-1.25728	-1.34387	-1.50517
shared B	1	49640001	49680000	-1.24411	-1.26551	-1.35595	-1.50539
shared B	1	49680001	49720000	-1.24558	-1.28536	-1.3614	-1.51775
shared B	1	49720001	49760000	-1.25053	-1.29186	-1.35859	-1.53815
shared B	1	49760001	49800000	-1.24099	-1.29092	-1.34683	-1.54599
shared B	1	49800001	49840000	-1.23931	-1.30898	-1.34198	-1.56657
shared B	1	49840001	49880000	-1.2286	-1.31189	-1.32451	-1.56102
shared B	1	49880001	49920000	-1.23707	-1.3327	-1.33314	-1.55303
shared B	1	49920001	49960000	-1.24061	-1.34296	-1.34208	-1.54393
shared B	1	49960001	50000000	-1.24871	-1.34103	-1.34562	-1.53392
shared B	1	50000001	50040000	-1.24701	-1.34421	-1.35163	-1.52993
shared B	1	50040001	50080000	-1.26041	-1.34037	-1.3627	-1.54439
shared B	1	50080001	50120000	-1.26659	-1.33317	-1.36425	-1.54803
shared B	1	50120001	50160000	-1.27014	-1.32174	-1.34984	-1.56743
shared B	1	50160001	50200000	-1.26138	-1.30962	-1.34861	-1.58111
shared B	1	50200001	50240000	-1.26238	-1.2987	-1.35029	-1.57141
shared B	1	50240001	50280000	-1.27201	-1.31148	-1.36494	-1.57477
shared B	1	50280001	50320000	-1.26785	-1.3136	-1.35445	-1.59516
shared B	1	50320001	50360000	-1.27058	-1.3268	-1.35281	-1.60626
shared B	1	50360001	50400000	-1.27609	-1.3244	-1.35801	-1.61004
shared B	1	50400001	50440000	-1.2869	-1.33198	-1.36807	-1.60422
shared B	1	50440001	50480000	-1.30597	-1.32862	-1.36478	-1.58312
shared B	1	50480001	50520000	-1.30708	-1.34539	-1.3715	-1.57569
shared B	1	50520001	50560000	-1.30264	-1.33127	-1.37706	-1.56215
shared B	1	50560001	50600000	-1.31486	-1.34685	-1.38989	-1.52873
shared B	1	50600001	50640000	-1.31707	-1.34886	-1.39212	-1.52115
shared B	1	50640001	50680000	-1.3165	-1.35137	-1.39285	-1.50805
shared B	1	50680001	50720000	-1.29189	-1.33929	-1.37018	-1.50041
shared B	1	50720001	50760000	-1.27008	-1.32163	-1.34734	-1.46389
shared B	1	50760001	50800000	-1.24134	-1.27254	-1.31362	-1.40677
shared B	1	50800001	50840000	-1.18887	-1.22643	-1.25254	-1.34111
shared B	1	50840001	50880000	-1.10486	-1.13133	-1.17325	-1.25323
shared B	1	50880001	50920000	-0.989619	-1.05008	-1.08357	-1.19042
shared B	1	50920001	50960000	-0.8671	-0.967679	-1.00481	-1.09379
shared B	1	50960001	51000000	-0.744504	-0.874882	-0.935568	-1.01138
shared B	1	51000001	51040000	-0.619666	-0.793549	-0.858096	-0.953177
shared B	1	51040001	51080000	-0.538679	-0.760216	-0.790441	-0.952099
shared B	1	51080001	51120000	-0.44536	-0.695999	-0.738457	-0.871215
shared B	1	51120001	51160000	-0.325123	-0.606948	-0.662175	-0.818206
A-B	1	51320001	51360000	0.237504	-0.228932	-0.361052	-0.591228
A-B	1	51360001	51400000	0.293811	-0.220863	-0.345797	-0.620954
A-B	1	51400001	51440000	0.308954	-0.199999	-0.35508	-0.63534
A-B	1	51440001	51480000	0.286844	-0.236844	-0.318725	-0.638461
A-B	1	51480001	51520000	0.249663	-0.252624	-0.337223	-0.63126
A-B	1	51520001	51560000	0.259055	-0.238302	-0.267112	-0.612911
A-B	1	51560001	51600000	0.31077	-0.158528	-0.180658	-0.540427
A-B	1	51600001	51640000	0.398773	-0.0211811	-0.0499703	-0.386069
shared A	1	51640001	51680000	0.524968	0.185502	0.102592	-0.2133
shared A	1	51680001	51720000	0.652454	0.376672	0.24971	-0.0351244
shared A	1	51720001	51760000	0.8144	0.621153	0.417069	0.183947
shared A	1	51760001	51800000	0.969696	0.816827	0.584392	0.432174
shared A	1	51800001	51840000	1.06846	0.953652	0.723432	0.537475
shared A	1	51840001	51880000	1.12971	1.0278	0.814265	0.642114
shared A	1	51880001	51920000	1.16287	1.09882	0.881488	0.716424
shared A	1	51920001	51960000	1.19966	1.15779	0.937936	0.808189
shared A	1	51960001	52000000	1.22742	1.2115	0.977146	0.847548
shared A	1	52000001	52040000	1.24262	1.23154	1.01268	0.91659
shared A	1	52040001	52080000	1.24682	1.24746	1.03958	0.943294
shared A	1	52080001	52120000	1.24794	1.26727	1.02791	1.01178
shared A	1	52120001	52160000	1.26208	1.2948	1.04545	1.04799
shared A	1	52160001	52200000	1.27835	1.30857	1.07469	1.05071
shared A	1	52200001	52240000	1.29231	1.33116	1.11395	1.04383
shared A	1	52240001	52280000	1.30774	1.34283	1.13125	1.08717
shared A	1	52280001	52320000	1.31782	1.35628	1.16832	1.09539
shared A	1	52320001	52360000	1.32795	1.36052	1.21553	1.12995
shared A	1	52360001	52400000	1.33379	1.37542	1.26156	1.18678
shared A	1	52400001	52440000	1.33401	1.38261	1.2826	1.19887
shared A	1	52440001	52480000	1.33392	1.3752	1.2928	1.21324
shared A	1	52480001	52520000	1.32421	1.37715	1.29391	1.22145
shared A	1	52520001	52560000	1.30533	1.36484	1.27988	1.20978
shared A	1	52560001	52600000	1.28567	1.35377	1.26157	1.18259
shared A	1	52600001	52640000	1.26705	1.33478	1.25034	1.14343
shared A	1	52640001	52680000	1.25152	1.31147	1.2459	1.10193
shared A	1	52680001	52720000	1.2551	1.29624	1.23582	1.10466
shared A	1	52720001	52760000	1.26604	1.29054	1.25821	1.13565
shared A	1	52760001	52800000	1.27436	1.29037	1.22215	1.13568
shared A	1	52800001	52840000	1.28295	1.29907	1.23756	1.14952
shared A	1	52840001	52880000	1.2835	1.29414	1.24138	1.1747
shared A	1	52880001	52920000	1.29053	1.29525	1.24689	1.19604
shared A	1	52920001	52960000	1.29271	1.29954	1.23747	1.18971
shared A	1	52960001	53000000	1.2783	1.30013	1.23509	1.16362
shared A	1	53000001	53040000	1.27129	1.30916	1.23322	1.15002
shared A	1	53040001	53080000	1.27373	1.32075	1.26886	1.18226
shared A	1	53080001	53120000	1.28532	1.33131	1.25973	1.20551
shared A	1	53120001	53160000	1.28839	1.3363	1.27771	1.21482
shared A	1	53160001	53200000	1.2817	1.33456	1.28748	1.22785
shared A	1	53200001	53240000	1.28753	1.33818	1.31511	1.23681
shared A	1	53240001	53280000	1.29111	1.34462	1.32656	1.26359
shared A	1	53280001	53320000	1.30068	1.34589	1.32666	1.23292
shared A	1	53320001	53360000	1.29269	1.3479	1.31036	1.19858
shared A	1	53360001	53400000	1.27676	1.34306	1.30258	1.24738
shared A	1	53400001	53440000	1.28127	1.34437	1.29831	1.24417
shared A	1	53440001	53480000	1.29014	1.35376	1.32317	1.24552
shared A	1	53480001	53520000	1.29944	1.357	1.33194	1.25315
shared A	1	53520001	53560000	1.29763	1.36034	1.33445	1.27119
shared A	1	53560001	53600000	1.30892	1.36581	1.33928	1.28237
shared A	1	53600001	53640000	1.31805	1.36956	1.34976	1.30802
shared A	1	53640001	53680000	1.31891	1.37454	1.34123	1.28329
shared A	1	53680001	53720000	1.31373	1.36753	1.33673	1.26688
shared A	1	53720001	53760000	1.30711	1.36979	1.32515	1.25763
shared A	1	53760001	53800000	1.30239	1.374	1.3155	1.21114
shared A	1	53800001	53840000	1.30766	1.38121	1.30515	1.17899
shared A	1	53840001	53880000	1.30052	1.37001	1.28007	1.16559
shared A	1	53880001	53920000	1.29953	1.36159	1.27591	1.14317
shared A	1	53920001	53960000	1.30321	1.35429	1.28379	1.13715
shared A	1	53960001	54000000	1.30616	1.36419	1.2659	1.12369
shared A	1	54000001	54040000	1.2943	1.36393	1.25005	1.08285
shared A	1	54040001	54080000	1.28996	1.35569	1.24761	1.07449
shared A	1	54080001	54120000	1.29547	1.35936	1.22939	1.09862
shared A	1	54120001	54160000	1.30581	1.35748	1.26446	1.12375
shared A	1	54160001	54200000	1.30682	1.37662	1.27787	1.1311
shared A	1	54200001	54240000	1.31016	1.37278	1.2999	1.13277
shared A	1	54240001	54280000	1.30613	1.37315	1.31318	1.15489
shared A	1	54280001	54320000	1.30493	1.36796	1.31175	1.2319
shared A	1	54320001	54360000	1.30295	1.35668	1.31007	1.22013
shared A	1	54360001	54400000	1.28214	1.33577	1.30323	1.20027
shared A	1	54400001	54440000	1.25051	1.32075	1.30082	1.16172
shared A	1	54440001	54480000	1.22613	1.29634	1.28342	1.19359
shared A	1	54480001	54520000	1.19712	1.27914	1.26814	1.20122
shared A	1	54520001	54560000	1.17063	1.25858	1.25882	1.16273
shared A	1	54560001	54600000	1.1467	1.24601	1.25598	1.16098
shared A	1	54600001	54640000	1.12526	1.25348	1.23808	1.17637
shared A	1	54640001	54680000	1.12161	1.25947	1.24787	1.17842
shared A	1	54680001	54720000	1.12168	1.264	1.25751	1.18234
shared A	1	54720001	54760000	1.13365	1.25692	1.24338	1.12844
shared A	1	54760001	54800000	1.13087	1.25074	1.25395	1.12734
shared A	1	54800001	54840000	1.12544	1.23773	1.21908	1.13076
shared A	1	54840001	54880000	1.10801	1.22625	1.21776	1.14986
shared A	1	54880001	54920000	1.08531	1.20321	1.21332	1.13858
shared A	1	54920001	54960000	1.03666	1.16557	1.20167	1.1216
shared A	1	54960001	55000000	0.975178	1.09861	1.18732	1.07962
shared A	1	55000001	55040000	0.893196	1.07045	1.18708	1.063
shared A	1	55040001	55080000	0.876541	1.06387	1.19133	1.03065
shared A	1	55080001	55120000	0.885316	1.05564	1.21669	1.05782
shared A	1	55120001	55160000	0.857476	1.04456	1.22155	1.03912
shared A	1	55160001	55200000	0.881073	1.06316	1.23063	0.99054
shared A	1	55200001	55240000	0.956521	1.11727	1.22301	1.02365
shared A	1	55240001	55280000	1.0662	1.16878	1.24802	1.07234
shared A	1	55280001	55320000	1.13056	1.21001	1.26361	1.06081
shared A	1	55320001	55360000	1.16204	1.21754	1.25524	1.07655
shared A	1	55360001	55400000	1.17352	1.23767	1.24867	1.06117
shared A	1	55400001	55440000	1.22161	1.25612	1.2561	1.00536
shared A	1	55440001	55480000	1.22718	1.26078	1.23022	0.975085
shared A	1	55480001	55520000	1.23074	1.23921	1.21384	0.865332
shared A	1	55520001	55560000	1.22248	1.22932	1.16898	0.77597
shared A	1	55560001	55600000	1.21134	1.21486	1.11991	0.702781
shared A	1	55600001	55640000	1.18929	1.18951	1.09155	0.633092
shared A	1	55640001	55680000	1.17445	1.14198	1.03964	0.446384
A-B	1	55680001	55720000	1.14834	1.10095	0.999885	0.38729
A-B	1	55720001	55760000	1.1427	1.06285	0.998468	0.34079
A-B	1	55760001	55800000	1.14788	1.04343	0.970625	0.32537
A-B	1	55800001	55840000	1.14422	1.0106	0.927053	0.288771
A-B	1	55840001	55880000	1.14118	0.986958	0.921748	0.256455
A-B	1	55880001	55920000	1.16533	0.978863	0.918778	0.267083
A-B	1	55920001	55960000	1.1867	0.982979	0.927097	0.350595
A-B	1	55960001	56000000	1.19899	1.02618	0.932995	0.373511
A-B	1	56000001	56040000	1.19294	1.02811	0.890016	0.367187
A-B	1	56040001	56080000	1.18999	1.04705	0.89851	0.364145
A-B	1	56080001	56120000	1.18781	1.05835	0.899838	0.372546
A-B	1	56120001	56160000	1.19945	1.06123	0.936576	0.363046
A-B	1	56160001	56200000	1.20406	1.05757	0.92419	0.340026
A-B	1	56200001	56240000	1.20925	1.0642	0.919267	0.274759
A-B	1	56240001	56280000	1.21275	1.047	0.910155	0.234651
A-B	1	56280001	56320000	1.21775	1.0195	0.934034	0.222879
A-B	1	56320001	56360000	1.21911	1.00567	0.926958	0.233861
A-B	1	56360001	56400000	1.22243	0.965898	0.879247	0.164739
A-B	1	56400001	56440000	1.21782	0.970065	0.861957	0.192938
A-B	1	56440001	56480000	1.22009	0.99213	0.852685	0.198919
A-B	1	56480001	56520000	1.21925	0.981431	0.85038	0.218762
A-B	1	56520001	56560000	1.22029	0.962674	0.841726	0.188398
A-B	1	56560001	56600000	1.21332	0.972412	0.843963	0.143231
A-B	1	56600001	56640000	1.21533	0.930041	0.819984	0.104431
A-B	1	56640001	56680000	1.21726	0.96256	0.83876	0.186682
A-B	1	56680001	56720000	1.20878	0.934843	0.812477	0.201865
A-B	1	56720001	56760000	1.20874	0.904976	0.799895	0.216465
A-B	1	56760001	56800000	1.21334	0.89165	0.794695	0.238226
A-B	1	56800001	56840000	1.18982	0.87949	0.789676	0.227581
A-B	1	56840001	56880000	1.18028	0.881413	0.794387	0.231515
A-B	1	56880001	56920000	1.16039	0.920778	0.814889	0.223909
A-B	1	56920001	56960000	1.12813	0.895726	0.788786	0.152141
A-B	1	56960001	57000000	1.11327	0.884538	0.795879	0.105323
A-B	1	57000001	57040000	1.06705	0.897869	0.776819	0.0284037
A-B	1	57040001	57080000	0.996683	0.859016	0.715173	-0.0272494
A-B	1	57080001	57120000	0.920389	0.783975	0.60634	-0.101462
A-B	1	57120001	57160000	0.851571	0.674797	0.541981	-0.190617
A-B	1	57160001	57200000	0.725692	0.562497	0.440842	-0.255977
A-B	1	57200001	57240000	0.609471	0.490996	0.411598	-0.278938
shared A	1	57240001	57280000	0.451431	0.389147	0.322085	-0.289353
shared A	1	57280001	57320000	0.301164	0.259176	0.244669	-0.307064
shared B	1	57640001	57680000	-0.227138	-0.219942	-0.0132164	-0.576578
shared B	1	57680001	57720000	-0.261563	-0.250492	-0.0633708	-0.587825
shared B	1	57720001	57760000	-0.294014	-0.315711	-0.139636	-0.624212
shared B	1	57760001	57800000	-0.322608	-0.356184	-0.209527	-0.601772
shared B	1	57800001	57840000	-0.328418	-0.333198	-0.22507	-0.652764
shared B	1	57840001	57880000	-0.37256	-0.376279	-0.23787	-0.617105
shared B	1	57880001	57920000	-0.414136	-0.420416	-0.269498	-0.635118
shared B	1	57920001	57960000	-0.412942	-0.459226	-0.280109	-0.635406
shared B	1	57960001	58000000	-0.402803	-0.474372	-0.250778	-0.670038
shared B	1	58000001	58040000	-0.45432	-0.460394	-0.204606	-0.673119
shared B	1	58040001	58080000	-0.514033	-0.524623	-0.23082	-0.729469
shared B	1	58080001	58120000	-0.555748	-0.611059	-0.295959	-0.749598
shared B	1	58120001	58160000	-0.586906	-0.616738	-0.347144	-0.820671
shared B	1	58160001	58200000	-0.540021	-0.588768	-0.327747	-0.750528
shared B	1	58200001	58240000	-0.558013	-0.633155	-0.340162	-0.805185
shared B	1	58240001	58280000	-0.611358	-0.611134	-0.37757	-0.787693
shared B	1	58280001	58320000	-0.602938	-0.637017	-0.424994	-0.778487
shared B	1	58320001	58360000	-0.589066	-0.650214	-0.413987	-0.755773
shared B	1	58360001	58400000	-0.609654	-0.606217	-0.390651	-0.74162
shared B	1	58400001	58440000	-0.580488	-0.613034	-0.355985	-0.708233
shared B	1	58440001	58480000	-0.620992	-0.678083	-0.401852	-0.737858
shared B	1	58480001	58520000	-0.671999	-0.668544	-0.394992	-0.695396
shared B	1	58520001	58560000	-0.683881	-0.637779	-0.383591	-0.721782
shared B	1	58560001	58600000	-0.701394	-0.610553	-0.414717	-0.707475
shared B	1	58600001	58640000	-0.697515	-0.518091	-0.38998	-0.705366
shared B	1	58640001	58680000	-0.674802	-0.472813	-0.377863	-0.688279
shared B	1	58680001	58720000	-0.6277	-0.408921	-0.335657	-0.683106
shared B	1	58720001	58760000	-0.528113	-0.255348	-0.237062	-0.560018
shared B	1	58760001	58800000	-0.363907	-0.0881843	-0.174376	-0.445623
shared B	1	58800001	58840000	-0.245688	0.0028572	-0.128415	-0.385785
shared A	1	58920001	58960000	0.218608	0.377343	0.137467	-0.155414
shared A	1	58960001	59000000	0.35009	0.4833	0.208093	-0.0736258
shared A	1	59000001	59040000	0.468881	0.520626	0.268437	-0.0181025
shared A	1	59040001	59080000	0.53692	0.580127	0.281168	0.0092646
shared A	1	59080001	59120000	0.636868	0.658918	0.360358	0.135192
shared A	1	59120001	59160000	0.729542	0.729933	0.421718	0.23271
shared A	1	59160001	59200000	0.794471	0.826369	0.492933	0.346215
shared A	1	59200001	59240000	0.845869	0.838499	0.535591	0.403459
shared A	1	59240001	59280000	0.906223	0.857327	0.613995	0.500928
shared A	1	59280001	59320000	0.951245	0.896238	0.607904	0.545987
shared A	1	59320001	59360000	0.986538	0.909796	0.671166	0.597123
shared A	1	59360001	59400000	1.00833	0.931017	0.704154	0.620303
shared A	1	59400001	59440000	1.01365	0.934319	0.729544	0.625922
shared A	1	59440001	59480000	1.02087	0.922287	0.747233	0.582725
shared A	1	59480001	59520000	1.01671	0.930912	0.75953	0.570492
shared A	1	59520001	59560000	0.999423	0.913043	0.696784	0.501509
shared A	1	59560001	59600000	0.978317	0.844967	0.688829	0.43881
shared A	1	59600001	59640000	0.977109	0.833743	0.666509	0.425026
shared A	1	59640001	59680000	0.980233	0.805295	0.630554	0.369652
shared A	1	59680001	59720000	0.966282	0.778966	0.63008	0.366734
shared A	1	59720001	59760000	0.996765	0.774429	0.592764	0.402893
shared A	1	59760001	59800000	1.02	0.788611	0.559476	0.373083
shared A	1	59800001	59840000	1.02184	0.824244	0.583555	0.418212
shared A	1	59840001	59880000	1.02047	0.858235	0.570408	0.519327
shared A	1	59880001	59920000	1.02529	0.845456	0.530013	0.512681
shared A	1	59920001	59960000	1.01605	0.820392	0.508355	0.501305
shared A	1	59960001	60000000	1.02231	0.788182	0.474252	0.447458
shared A	1	60000001	60040000	0.989961	0.805205	0.481884	0.386953
shared A	1	60040001	60080000	0.952069	0.787964	0.455621	0.392215
shared A	1	60080001	60120000	0.893561	0.701052	0.321625	0.280476
A-B	1	60120001	60160000	0.730586	0.484248	0.0735892	-0.0371076
shared A	1	60160001	60200000	0.403293	0.151822	-0.198355	-0.26429
shared B	1	60240001	60280000	-0.372874	-0.495815	-0.634089	-0.690287
shared B	1	60280001	60320000	-0.698122	-0.752185	-0.803343	-0.871467
shared B	1	60320001	60360000	-0.942116	-0.950362	-0.961256	-1.01305
shared B	1	60360001	60400000	-1.09168	-1.07062	-1.07278	-1.15707
shared B	1	60400001	60440000	-1.13794	-1.07513	-1.1038	-1.1735
shared B	1	60440001	60480000	-1.13315	-1.04944	-1.1197	-1.22304
shared B	1	60480001	60520000	-1.11636	-1.0165	-1.11312	-1.16482
shared B	1	60520001	60560000	-1.13564	-1.01736	-1.15398	-1.17847
shared B	1	60560001	60600000	-1.15135	-1.0533	-1.18367	-1.18644
shared B	1	60600001	60640000	-1.15444	-1.0495	-1.18614	-1.23517
shared B	1	60640001	60680000	-1.18031	-1.1034	-1.20941	-1.29795
shared B	1	60680001	60720000	-1.22049	-1.17442	-1.25368	-1.33996
shared B	1	60720001	60760000	-1.2703	-1.25142	-1.30305	-1.35149
shared B	1	60760001	60800000	-1.30196	-1.2985	-1.3344	-1.45083
shared B	1	60800001	60840000	-1.31663	-1.31741	-1.34821	-1.48391
shared B	1	60840001	60880000	-1.32508	-1.33231	-1.36257	-1.51453
shared B	1	60880001	60920000	-1.34722	-1.35828	-1.39066	-1.51379
shared B	1	60920001	60960000	-1.33813	-1.35827	-1.41264	-1.50789
shared B	1	60960001	61000000	-1.33612	-1.35845	-1.41886	-1.51672
shared B	1	61000001	61040000	-1.32935	-1.3592	-1.41435	-1.53649
shared B	1	61040001	61080000	-1.33182	-1.35221	-1.41805	-1.53519
shared B	1	61080001	61120000	-1.33035	-1.35029	-1.41274	-1.51537
shared B	1	61120001	61160000	-1.32373	-1.34513	-1.39656	-1.51293
shared B	1	61160001	61200000	-1.29962	-1.33498	-1.37856	-1.46822
shared B	1	61200001	61240000	-1.2792	-1.31699	-1.36949	-1.44521
shared B	1	61240001	61280000	-1.25154	-1.28445	-1.33816	-1.38068
shared B	1	61280001	61320000	-1.21592	-1.24933	-1.30216	-1.30081
shared B	1	61320001	61360000	-1.1962	-1.20528	-1.26822	-1.19765
shared B	1	61360001	61400000	-1.15193	-1.14216	-1.22637	-1.13234
shared B	1	61400001	61440000	-1.04903	-1.01672	-1.09928	-1.05368
shared B	1	61440001	61480000	-0.881311	-0.85527	-0.968489	-0.932477
shared B	1	61480001	61520000	-0.730879	-0.701774	-0.819814	-0.879763
shared B	1	61520001	61560000	-0.56007	-0.560354	-0.710385	-0.856801
shared B	1	61560001	61600000	-0.383608	-0.427671	-0.605273	-0.81781
shared B	1	61600001	61640000	-0.232401	-0.316827	-0.515979	-0.783768
shared B	1	61720001	61760000	-0.293983	-0.42872	-0.572083	-0.779134
shared B	1	61760001	61800000	-0.344871	-0.531252	-0.60731	-0.768493
shared B	1	61800001	61840000	-0.38165	-0.581268	-0.625007	-0.707934
shared B	1	61840001	61880000	-0.355203	-0.592902	-0.607587	-0.693059
shared B	1	61880001	61920000	-0.319025	-0.573807	-0.591105	-0.683654
shared B	1	61920001	61960000	-0.270482	-0.503303	-0.542605	-0.680332
A-B	1	62160001	62200000	0.0502055	0.0199325	-0.481088	-0.720584
shared B	1	62240001	62280000	-0.271356	-0.236398	-0.593915	-0.796598
shared B	1	62280001	62320000	-0.431839	-0.390077	-0.659224	-0.814846
shared B	1	62320001	62360000	-0.594357	-0.568537	-0.76626	-0.882844
shared B	1	62360001	62400000	-0.751858	-0.701814	-0.809307	-0.9125
shared B	1	62400001	62440000	-0.85158	-0.827897	-0.817342	-0.87143
shared B	1	62440001	62480000	-0.898082	-0.907925	-0.834422	-0.86935
shared B	1	62480001	62520000	-0.835329	-0.879944	-0.77336	-0.837302
shared B	1	62520001	62560000	-0.765058	-0.80974	-0.695665	-0.760285
shared B	1	62560001	62600000	-0.667939	-0.72176	-0.573998	-0.645257
shared B	1	62600001	62640000	-0.550786	-0.635286	-0.408599	-0.471355
shared B	1	62640001	62680000	-0.395135	-0.479725	-0.291026	-0.303103
shared B	1	62680001	62720000	-0.28379	-0.370612	-0.14872	-0.17704
shared B	1	62720001	62760000	-0.246548	-0.283534	-0.0790746	-0.0749249
shared A	1	62920001	62960000	0.298356	0.193464	0.16514	-0.0822733
shared A	1	62960001	63000000	0.411779	0.304578	0.1557	-0.0478094
shared A	1	63000001	63040000	0.544017	0.392347	0.192902	-0.0318348
shared A	1	63040001	63080000	0.587427	0.414022	0.197506	-0.0460372
shared A	1	63080001	63120000	0.549178	0.351876	0.144497	-0.062362
shared A	1	63120001	63160000	0.363942	0.205409	0.00918674	-0.122104
shared B	1	63200001	63240000	-0.279396	-0.386503	-0.489144	-0.503992
shared B	1	63240001	63280000	-0.709508	-0.747492	-0.754062	-0.766405
shared B	1	63280001	63320000	-1.02706	-1.00003	-0.992282	-0.988914
shared B	1	63320001	63360000	-1.17622	-1.16106	-1.19856	-1.1681
shared B	1	63360001	63400000	-1.27231	-1.2672	-1.30567	-1.28823
shared B	1	63400001	63440000	-1.3076	-1.31851	-1.3613	-1.35176
shared B	1	63440001	63480000	-1.32925	-1.3444	-1.39753	-1.39861
shared B	1	63480001	63520000	-1.33932	-1.35217	-1.41355	-1.43021
shared B	1	63520001	63560000	-1.34384	-1.3637	-1.43557	-1.44611
shared B	1	63560001	63600000	-1.33836	-1.37697	-1.4337	-1.48778
shared B	1	63600001	63640000	-1.33877	-1.38361	-1.42512	-1.48626
shared B	1	63640001	63680000	-1.33382	-1.36092	-1.40283	-1.48876
shared B	1	63680001	63720000	-1.32478	-1.34722	-1.39278	-1.47056
shared B	1	63720001	63760000	-1.31097	-1.32927	-1.38703	-1.43067
shared B	1	63760001	63800000	-1.27902	-1.3079	-1.36817	-1.41425
shared B	1	63800001	63840000	-1.22653	-1.2432	-1.32815	-1.37936
shared B	1	63840001	63880000	-1.17171	-1.14781	-1.27167	-1.28885
shared B	1	63880001	63920000	-1.06146	-1.04002	-1.17519	-1.18498
shared B	1	63920001	63960000	-0.90346	-0.862971	-1.02009	-1.03691
shared B	1	63960001	64000000	-0.696361	-0.598735	-0.816177	-0.886928
shared B	1	64000001	64040000	-0.424488	-0.288227	-0.531556	-0.701194
shared A	1	64080001	64120000	0.265398	0.313502	0.0118162	-0.239809
shared A	1	64120001	64160000	0.552098	0.53475	0.304586	-0.0404419
shared A	1	64160001	64200000	0.722701	0.706986	0.484701	0.125215
shared A	1	64200001	64240000	0.835519	0.807178	0.545538	0.196324
shared A	1	64240001	64280000	0.873715	0.834963	0.515475	0.21003
shared A	1	64280001	64320000	0.909745	0.863743	0.514394	0.295803
shared A	1	64320001	64360000	0.91288	0.884811	0.526083	0.325042
shared A	1	64360001	64400000	0.911149	0.874306	0.519385	0.393526
shared A	1	64400001	64440000	0.907472	0.888863	0.50479	0.42931
shared A	1	64440001	64480000	0.904818	0.878738	0.487343	0.420788
shared A	1	64480001	64520000	0.887726	0.851308	0.525536	0.447424
shared A	1	64520001	64560000	0.838573	0.862772	0.558284	0.39485
shared A	1	64560001	64600000	0.776806	0.828007	0.494297	0.331416
shared A	1	64600001	64640000	0.713233	0.754031	0.492607	0.259667
shared A	1	64640001	64680000	0.65168	0.708391	0.534888	0.275357
shared A	1	64680001	64720000	0.578056	0.603918	0.523245	0.268248
shared A	1	64720001	64760000	0.436377	0.462458	0.498263	0.265941
shared A	1	64760001	64800000	0.355228	0.346199	0.496375	0.191031
shared A	1	64800001	64840000	0.28862	0.279334	0.512522	0.188888
shared A	1	64840001	64880000	0.315737	0.287844	0.572031	0.193977
shared A	1	64880001	64920000	0.316918	0.325667	0.582663	0.261788
shared A	1	64920001	64960000	0.324741	0.320049	0.591955	0.265753
shared A	1	64960001	65000000	0.294728	0.351523	0.616716	0.218164
shared A	1	65000001	65040000	0.326669	0.388538	0.654151	0.211087
shared A	1	65040001	65080000	0.26436	0.428979	0.679294	0.245333
shared A	1	65080001	65120000	0.23463	0.393182	0.641725	0.314523
shared A	1	65200001	65240000	0.233779	0.386441	0.686315	0.269699
shared A	1	65240001	65280000	0.363467	0.515604	0.754373	0.427397
shared A	1	65280001	65320000	0.500827	0.623481	0.769981	0.518753
shared A	1	65320001	65360000	0.657445	0.690347	0.808087	0.64777
shared A	1	65360001	65400000	0.730477	0.740887	0.860833	0.717712
shared A	1	65400001	65440000	0.746437	0.787658	0.912719	0.862836
shared A	1	65440001	65480000	0.73572	0.777356	0.921443	0.846666
shared A	1	65480001	65520000	0.642073	0.700098	0.952622	0.904391
shared A	1	65520001	65560000	0.576749	0.605834	0.901224	0.850054
shared A	1	65560001	65600000	0.507591	0.568922	0.934002	0.844406
shared A	1	65600001	65640000	0.500756	0.630486	0.929968	0.820709
shared A	1	65640001	65680000	0.52735	0.66061	0.913101	0.811956
shared A	1	65680001	65720000	0.571904	0.739762	0.951476	0.771733
shared A	1	65720001	65760000	0.647497	0.842038	0.949048	0.832569
shared A	1	65760001	65800000	0.720012	0.918623	0.935007	0.835332
shared A	1	65800001	65840000	0.749159	0.941195	0.947883	0.846658
shared A	1	65840001	65880000	0.746844	0.958438	0.939358	0.860716
shared A	1	65880001	65920000	0.667569	0.933514	0.920468	0.843357
shared A	1	65920001	65960000	0.62371	0.928089	0.857782	0.77907
shared A	1	65960001	66000000	0.528807	0.885044	0.74473	0.735371
shared A	1	66000001	66040000	0.430248	0.803371	0.689568	0.634161
shared A	1	66040001	66080000	0.3527	0.742627	0.666133	0.537397
shared A	1	66080001	66120000	0.286162	0.734092	0.659506	0.419789
shared A	1	66120001	66160000	0.282269	0.774617	0.673864	0.364764
shared A	1	66160001	66200000	0.362324	0.83003	0.693115	0.453699
shared A	1	66200001	66240000	0.375633	0.825771	0.763282	0.549846
shared A	1	66240001	66280000	0.394201	0.859166	0.80315	0.521982
shared A	1	66280001	66320000	0.400313	0.880438	0.84275	0.479657
shared A	1	66320001	66360000	0.347812	0.861783	0.752211	0.521989
shared A	1	66360001	66400000	0.270503	0.784902	0.726888	0.500452
shared B	1	66520001	66560000	-0.242206	0.205409	0.323265	0.0713659
shared B	1	66560001	66600000	-0.256143	0.249236	0.290457	0.096973
shared A	1	66640001	66680000	0.249148	0.695237	0.62244	0.332443
shared A	1	66680001	66720000	0.426526	0.849346	0.756219	0.489196
shared A	1	66720001	66760000	0.630946	0.979331	0.838326	0.598529
shared A	1	66760001	66800000	0.76989	1.06486	0.890698	0.741127
shared A	1	66800001	66840000	0.853432	1.11311	0.931961	0.84936
shared A	1	66840001	66880000	0.919633	1.13215	0.93708	0.882418
shared A	1	66880001	66920000	0.929223	1.13791	0.916663	0.916008
shared A	1	66920001	66960000	0.939596	1.14337	0.920255	0.889545
shared A	1	66960001	67000000	0.920003	1.16214	0.860909	0.846968
shared A	1	67000001	67040000	0.887195	1.16231	0.829972	0.817501
shared A	1	67040001	67080000	0.843557	1.1348	0.800908	0.780982
shared A	1	67080001	67120000	0.713766	1.0559	0.730479	0.711676
shared A	1	67120001	67160000	0.451601	0.875561	0.603861	0.586954
shared B	1	67200001	67240000	-0.237017	0.184158	0.219275	0.282278
shared B	1	67240001	67280000	-0.454745	-0.085083	0.142151	0.231284
B-A	1	67280001	67320000	-0.572176	-0.252116	0.0875873	0.223984
B-A	1	67320001	67360000	-0.700777	-0.43107	0.0341078	0.173443
B-A	1	67360001	67400000	-0.683788	-0.433974	0.0741223	0.141396
B-A	1	67400001	67440000	-0.698685	-0.41252	0.0626121	0.170763
B-A	1	67440001	67480000	-0.731562	-0.444588	0.128797	0.19439
B-A	1	67480001	67520000	-0.754051	-0.435614	0.142377	0.192083
B-A	1	67520001	67560000	-0.880721	-0.577715	0.0327953	0.0594217
B-A	1	67560001	67600000	-1.03388	-0.777897	-0.0751651	-0.122839
B-A	1	67600001	67640000	-1.12878	-0.936599	-0.19306	-0.261721
B-A	1	67640001	67680000	-1.20057	-1.02781	-0.288962	-0.354939
B-A	1	67680001	67720000	-1.18124	-1.01486	-0.220395	-0.339726
B-A	1	67720001	67760000	-1.12655	-0.929481	-0.183363	-0.229445
B-A	1	67760001	67800000	-1.08981	-0.88244	-0.0915953	-0.164549
B-A	1	67800001	67840000	-1.04628	-0.835543	-0.0527801	-0.0750075
B-A	1	67840001	67880000	-0.991049	-0.780725	-0.0359213	-0.012167
B-A	1	67880001	67920000	-0.776722	-0.552572	0.107549	0.109743
B-A	1	67920001	67960000	-0.465696	-0.220674	0.239323	0.300376
shared B	1	67960001	68000000	-0.261548	0.000955371	0.315954	0.382738
shared A	1	68080001	68120000	0.213958	0.414458	0.380466	0.517017
shared A	1	68120001	68160000	0.355598	0.524645	0.417114	0.526705
shared A	1	68160001	68200000	0.302112	0.512282	0.330823	0.502881
shared B	1	68280001	68320000	-0.216848	-0.0959551	-0.125168	-0.00951817
shared B	1	68320001	68360000	-0.375454	-0.258127	-0.281613	-0.106922
shared B	1	68360001	68400000	-0.537888	-0.444681	-0.373502	-0.211648
shared B	1	68400001	68440000	-0.702148	-0.640666	-0.519942	-0.306826
shared B	1	68440001	68480000	-0.8101	-0.729784	-0.603925	-0.402513
shared B	1	68480001	68520000	-0.776558	-0.729098	-0.589508	-0.41796
shared B	1	68520001	68560000	-0.707438	-0.663175	-0.605527	-0.386822
shared B	1	68560001	68600000	-0.704882	-0.665964	-0.606735	-0.39002
shared B	1	68600001	68640000	-0.683766	-0.682378	-0.544899	-0.46577
shared B	1	68640001	68680000	-0.635364	-0.616366	-0.492544	-0.444147
shared B	1	68680001	68720000	-0.580648	-0.55218	-0.49873	-0.437741
shared B	1	68720001	68760000	-0.551292	-0.558193	-0.528824	-0.523942
shared B	1	68760001	68800000	-0.608834	-0.644523	-0.628333	-0.646466
shared B	1	68800001	68840000	-0.770689	-0.739839	-0.747829	-0.815517
shared B	1	68840001	68880000	-0.883799	-0.847925	-0.88897	-1.01181
shared B	1	68880001	68920000	-1.0035	-0.954501	-1.06173	-1.15704
shared B	1	68920001	68960000	-1.10481	-1.0443	-1.18652	-1.31681
shared B	1	68960001	69000000	-1.18018	-1.14547	-1.25391	-1.39638
shared B	1	69000001	69040000	-1.23375	-1.22807	-1.30855	-1.47594
shared B	1	69040001	69080000	-1.27629	-1.26384	-1.34482	-1.47933
shared B	1	69080001	69120000	-1.29888	-1.32154	-1.35535	-1.51839
shared B	1	69120001	69160000	-1.31336	-1.34238	-1.37097	-1.52071
shared B	1	69160001	69200000	-1.31918	-1.34833	-1.37882	-1.52389
shared B	1	69200001	69240000	-1.3205	-1.36067	-1.36973	-1.5295
shared B	1	69240001	69280000	-1.32544	-1.35323	-1.38677	-1.55964
shared B	1	69280001	69320000	-1.31456	-1.3487	-1.3853	-1.55027
shared B	1	69320001	69360000	-1.30371	-1.34853	-1.40308	-1.54265
shared B	1	69360001	69400000	-1.29987	-1.34002	-1.39696	-1.5399
shared B	1	69400001	69440000	-1.29921	-1.33905	-1.40731	-1.54745
shared B	1	69440001	69480000	-1.3019	-1.35146	-1.41657	-1.5531
shared B	1	69480001	69520000	-1.30008	-1.32789	-1.40795	-1.53692
shared B	1	69520001	69560000	-1.2943	-1.33522	-1.40281	-1.53186
shared B	1	69560001	69600000	-1.28718	-1.34267	-1.39445	-1.5183
shared B	1	69600001	69640000	-1.28819	-1.33407	-1.3789	-1.51268
shared B	1	69640001	69680000	-1.28319	-1.33023	-1.3887	-1.53016
shared B	1	69680001	69720000	-1.26497	-1.32269	-1.38761	-1.52554
shared B	1	69720001	69760000	-1.24736	-1.29291	-1.3765	-1.5176
shared B	1	69760001	69800000	-1.22066	-1.29304	-1.35567	-1.49247
shared B	1	69800001	69840000	-1.19613	-1.24472	-1.33891	-1.43948
shared B	1	69840001	69880000	-1.13703	-1.17083	-1.28143	-1.41012
shared B	1	69880001	69920000	-1.11941	-1.10336	-1.27315	-1.40252
shared B	1	69920001	69960000	-1.08345	-1.0534	-1.27641	-1.35079
shared B	1	69960001	70000000	-1.05993	-0.991083	-1.25987	-1.34739
shared B	1	70000001	70040000	-1.01964	-0.974732	-1.27816	-1.29044
shared B	1	70040001	70080000	-1.0132	-0.941251	-1.27705	-1.30051
shared B	1	70080001	70120000	-1.01894	-0.982365	-1.27959	-1.33925
shared B	1	70120001	70160000	-1.08865	-1.07296	-1.29334	-1.37133
shared B	1	70160001	70200000	-1.07585	-1.11552	-1.30115	-1.34525
shared B	1	70200001	70240000	-1.09326	-1.14974	-1.29672	-1.34284
shared B	1	70240001	70280000	-1.08539	-1.17538	-1.26502	-1.29421
shared B	1	70280001	70320000	-1.1	-1.16983	-1.21002	-1.26451
shared B	1	70320001	70360000	-1.08028	-1.13682	-1.20121	-1.25283
shared B	1	70360001	70400000	-1.04006	-1.06418	-1.15757	-1.19564
shared B	1	70400001	70440000	-0.965364	-0.99061	-1.11442	-1.13234
shared B	1	70440001	70480000	-0.938784	-0.928063	-1.05727	-1.11092
shared B	1	70480001	70520000	-0.870318	-0.81647	-0.993217	-1.01798
shared B	1	70520001	70560000	-0.74336	-0.686115	-0.932519	-0.985515
shared B	1	70560001	70600000	-0.553351	-0.460065	-0.782417	-0.836537
shared B	1	70600001	70640000	-0.382417	-0.292438	-0.646072	-0.687879
shared B	1	70640001	70680000	-0.260432	-0.181191	-0.551842	-0.613058
shared B	1	70680001	70720000	-0.233613	-0.106903	-0.462633	-0.520934
shared B	1	70720001	70760000	-0.228954	-0.0652933	-0.424465	-0.42782
shared B	1	70760001	70800000	-0.214793	-0.076987	-0.385082	-0.411817
shared B	1	70800001	70840000	-0.25351	-0.125376	-0.394817	-0.37778
shared B	1	70840001	70880000	-0.429838	-0.335472	-0.557335	-0.53302
shared B	1	70880001	70920000	-0.680832	-0.6012	-0.765745	-0.771247
shared B	1	70920001	70960000	-0.884153	-0.836903	-0.916708	-0.967905
shared B	1	70960001	71000000	-1.00736	-1.00075	-1.05714	-1.11043
shared B	1	71000001	71040000	-1.06962	-1.05843	-1.14065	-1.2212
shared B	1	71040001	71080000	-1.10952	-1.09457	-1.18483	-1.28856
shared B	1	71080001	71120000	-1.14546	-1.10617	-1.20865	-1.29049
shared B	1	71120001	71160000	-1.12668	-1.10556	-1.20754	-1.31183
shared B	1	71160001	71200000	-1.08363	-1.04527	-1.18949	-1.31351
shared B	1	71200001	71240000	-1.04224	-0.972401	-1.17178	-1.29896
shared B	1	71240001	71280000	-1.01197	-0.928067	-1.13186	-1.29668
shared B	1	71280001	71320000	-0.99824	-0.904472	-1.0884	-1.29716
shared B	1	71320001	71360000	-0.984364	-0.884663	-1.10214	-1.32529
shared B	1	71360001	71400000	-0.988432	-0.895969	-1.0929	-1.30089
shared B	1	71400001	71440000	-0.966085	-0.835338	-1.06524	-1.25234
shared B	1	71440001	71480000	-0.995646	-0.900079	-1.09084	-1.26766
shared B	1	71480001	71520000	-1.05399	-0.969408	-1.11779	-1.29437
shared B	1	71520001	71560000	-1.0827	-1.00806	-1.11631	-1.3001
shared B	1	71560001	71600000	-1.09277	-1.05741	-1.14664	-1.32584
shared B	1	71600001	71640000	-1.12264	-1.08772	-1.14881	-1.31833
shared B	1	71640001	71680000	-1.15731	-1.14503	-1.19251	-1.33807
shared B	1	71680001	71720000	-1.19913	-1.23123	-1.2092	-1.38166
shared B	1	71720001	71760000	-1.21068	-1.22866	-1.19969	-1.39748
shared B	1	71760001	71800000	-1.16402	-1.22295	-1.176	-1.34978
shared B	1	71800001	71840000	-1.14136	-1.20704	-1.17994	-1.31783
shared B	1	71840001	71880000	-1.09729	-1.17664	-1.18132	-1.2765
shared B	1	71880001	71920000	-1.05401	-1.14237	-1.1217	-1.25082
shared B	1	71920001	71960000	-0.985021	-1.09047	-1.05862	-1.2292
shared B	1	71960001	72000000	-0.854246	-1.0014	-0.995457	-1.22367
shared B	1	72000001	72040000	-0.657553	-0.877415	-0.931812	-1.18213
shared B	1	72040001	72080000	-0.55717	-0.760431	-0.900955	-1.16631
shared B	1	72080001	72120000	-0.451564	-0.708517	-0.844793	-1.19033
A-B	1	72120001	72160000	-0.359923	-0.667232	-0.820396	-1.19662
A-B	1	72160001	72200000	-0.325716	-0.656914	-0.852154	-1.19985
A-B	1	72200001	72240000	-0.302964	-0.654143	-0.828241	-1.19074
A-B	1	72240001	72280000	-0.357992	-0.738801	-0.871874	-1.18292
shared B	1	72280001	72320000	-0.451701	-0.809196	-0.913347	-1.1812
A-B	1	72320001	72360000	-0.454054	-0.828821	-0.934752	-1.2446
shared B	1	72360001	72400000	-0.452773	-0.832319	-0.909275	-1.20188
shared B	1	72400001	72440000	-0.451637	-0.811547	-0.907818	-1.19608
A-B	1	72440001	72480000	-0.394033	-0.764184	-0.866607	-1.1846
A-B	1	72480001	72520000	-0.372234	-0.726364	-0.869283	-1.19654
A-B	1	72520001	72560000	-0.379781	-0.644137	-0.833222	-1.17776
A-B	1	72560001	72600000	-0.387862	-0.587852	-0.810469	-1.18258
shared B	1	72600001	72640000	-0.364709	-0.485932	-0.781655	-1.09479
shared B	1	72640001	72680000	-0.36185	-0.42707	-0.814126	-1.05727
shared B	1	72680001	72720000	-0.389902	-0.376495	-0.804758	-1.06663
shared B	1	72720001	72760000	-0.425224	-0.377296	-0.792118	-1.06258
shared B	1	72760001	72800000	-0.481394	-0.397781	-0.820845	-1.04115
shared B	1	72800001	72840000	-0.571146	-0.463465	-0.880696	-1.09419
shared B	1	72840001	72880000	-0.642196	-0.556448	-0.928529	-1.13223
shared B	1	72880001	72920000	-0.742718	-0.702795	-0.982067	-1.16947
shared B	1	72920001	72960000	-0.795449	-0.7733	-1.00046	-1.24978
shared B	1	72960001	73000000	-0.86654	-0.844538	-1.05103	-1.23337
shared B	1	73000001	73040000	-0.961147	-0.94416	-1.10303	-1.27001
shared B	1	73040001	73080000	-1.03273	-1.0379	-1.16776	-1.32373
shared B	1	73080001	73120000	-1.07402	-1.08204	-1.19906	-1.35384
shared B	1	73120001	73160000	-1.1019	-1.11918	-1.24028	-1.36875
shared B	1	73160001	73200000	-1.15172	-1.15559	-1.25193	-1.42412
shared B	1	73200001	73240000	-1.20265	-1.19931	-1.28652	-1.44135
shared B	1	73240001	73280000	-1.21365	-1.22301	-1.30916	-1.48456
shared B	1	73280001	73320000	-1.22048	-1.22086	-1.33001	-1.49276
shared B	1	73320001	73360000	-1.2187	-1.2338	-1.32546	-1.48579
shared B	1	73360001	73400000	-1.2212	-1.23529	-1.32218	-1.48702
shared B	1	73400001	73440000	-1.21859	-1.25463	-1.32189	-1.51152
shared B	1	73440001	73480000	-1.21606	-1.25206	-1.3021	-1.48854
shared B	1	73480001	73520000	-1.22153	-1.26007	-1.31477	-1.47568
shared B	1	73520001	73560000	-1.22362	-1.26639	-1.33087	-1.4994
shared B	1	73560001	73600000	-1.22008	-1.28068	-1.33308	-1.50547
shared B	1	73600001	73640000	-1.22225	-1.28221	-1.33111	-1.51503
shared B	1	73640001	73680000	-1.2112	-1.26947	-1.31948	-1.50826
shared B	1	73680001	73720000	-1.20761	-1.26508	-1.32104	-1.50653
shared B	1	73720001	73760000	-1.21636	-1.27612	-1.32391	-1.48504
shared B	1	73760001	73800000	-1.2068	-1.25195	-1.30784	-1.47493
shared B	1	73800001	73840000	-1.19925	-1.26053	-1.29283	-1.45008
shared B	1	73840001	73880000	-1.20682	-1.26967	-1.30296	-1.44217
shared B	1	73880001	73920000	-1.2054	-1.27763	-1.30046	-1.44868
shared B	1	73920001	73960000	-1.21485	-1.28556	-1.28184	-1.45033
shared B	1	73960001	74000000	-1.20876	-1.28979	-1.29473	-1.43919
shared B	1	74000001	74040000	-1.1952	-1.26627	-1.28069	-1.46684
shared B	1	74040001	74080000	-1.19694	-1.27297	-1.29373	-1.48578
shared B	1	74080001	74120000	-1.20346	-1.26908	-1.2983	-1.51018
shared B	1	74120001	74160000	-1.2049	-1.2788	-1.30155	-1.5203
shared B	1	74160001	74200000	-1.20704	-1.29112	-1.29713	-1.54531
shared B	1	74200001	74240000	-1.21945	-1.29541	-1.30772	-1.53709
shared B	1	74240001	74280000	-1.24503	-1.29176	-1.30308	-1.52905
shared B	1	74280001	74320000	-1.2385	-1.3017	-1.31478	-1.52934
shared B	1	74320001	74360000	-1.22721	-1.28954	-1.31023	-1.52015
shared B	1	74360001	74400000	-1.22625	-1.28078	-1.32434	-1.5322
shared B	1	74400001	74440000	-1.23032	-1.30127	-1.30528	-1.55546
shared B	1	74440001	74480000	-1.22542	-1.30017	-1.31922	-1.56105
shared B	1	74480001	74520000	-1.21303	-1.28707	-1.31135	-1.53509
shared B	1	74520001	74560000	-1.18435	-1.25418	-1.2845	-1.53412
shared B	1	74560001	74600000	-1.17421	-1.24299	-1.28291	-1.48754
shared B	1	74600001	74640000	-1.17178	-1.24774	-1.29273	-1.48919
shared B	1	74640001	74680000	-1.18552	-1.25889	-1.27368	-1.45327
shared B	1	74680001	74720000	-1.1906	-1.25228	-1.28676	-1.44193
shared B	1	74720001	74760000	-1.19544	-1.24545	-1.28421	-1.43637
shared B	1	74760001	74800000	-1.20962	-1.24526	-1.28215	-1.41942
shared B	1	74800001	74840000	-1.22788	-1.27989	-1.31279	-1.43843
shared B	1	74840001	74880000	-1.23887	-1.28556	-1.31251	-1.45947
shared B	1	74880001	74920000	-1.23887	-1.29818	-1.32336	-1.44471
shared B	1	74920001	74960000	-1.23384	-1.2822	-1.309	-1.47006
shared B	1	74960001	75000000	-1.22734	-1.27866	-1.31337	-1.45262
shared B	1	75000001	75040000	-1.21567	-1.27926	-1.30209	-1.45416
shared B	1	75040001	75080000	-1.18009	-1.26748	-1.3024	-1.44486
shared B	1	75080001	75120000	-1.16873	-1.25211	-1.31783	-1.41388
shared B	1	75120001	75160000	-1.17204	-1.25305	-1.33108	-1.39685
shared B	1	75160001	75200000	-1.17284	-1.23354	-1.33688	-1.40087
shared B	1	75200001	75240000	-1.18717	-1.24973	-1.35671	-1.41343
shared B	1	75240001	75280000	-1.19611	-1.27972	-1.35801	-1.41739
shared B	1	75280001	75320000	-1.21257	-1.28684	-1.3582	-1.45007
shared B	1	75320001	75360000	-1.24785	-1.32356	-1.36749	-1.49155
shared B	1	75360001	75400000	-1.26704	-1.35662	-1.36569	-1.51483
shared B	1	75400001	75440000	-1.26431	-1.36508	-1.3724	-1.51533
shared B	1	75440001	75480000	-1.25279	-1.35457	-1.36519	-1.52107
shared B	1	75480001	75520000	-1.25112	-1.3492	-1.34948	-1.51989
shared B	1	75520001	75560000	-1.25814	-1.33739	-1.35766	-1.52866
shared B	1	75560001	75600000	-1.2701	-1.33148	-1.36124	-1.51976
shared B	1	75600001	75640000	-1.26715	-1.32359	-1.36969	-1.51758
shared B	1	75640001	75680000	-1.27672	-1.33042	-1.37145	-1.53735
shared B	1	75680001	75720000	-1.29411	-1.33292	-1.37247	-1.53295
shared B	1	75720001	75760000	-1.30991	-1.3485	-1.38799	-1.54463
shared B	1	75760001	75800000	-1.31173	-1.36466	-1.39232	-1.55891
shared B	1	75800001	75840000	-1.3073	-1.37654	-1.3946	-1.55417
shared B	1	75840001	75880000	-1.30109	-1.37417	-1.39128	-1.56823
shared B	1	75880001	75920000	-1.30499	-1.38593	-1.38561	-1.57262
shared B	1	75920001	75960000	-1.29415	-1.38488	-1.39007	-1.57308
shared B	1	75960001	76000000	-1.28956	-1.38329	-1.39597	-1.54795
shared B	1	76000001	76040000	-1.28222	-1.37078	-1.39115	-1.55247
shared B	1	76040001	76080000	-1.27122	-1.33312	-1.37172	-1.52475
shared B	1	76080001	76120000	-1.22981	-1.26699	-1.32666	-1.46476
shared B	1	76120001	76160000	-1.19708	-1.2089	-1.27938	-1.4114
shared B	1	76160001	76200000	-1.18721	-1.20633	-1.24873	-1.32888
shared B	1	76200001	76240000	-1.17584	-1.17681	-1.22658	-1.27666
shared B	1	76240001	76280000	-1.16401	-1.1698	-1.20871	-1.27579
shared B	1	76280001	76320000	-1.14548	-1.14865	-1.16156	-1.24668
shared B	1	76320001	76360000	-1.17418	-1.17853	-1.17763	-1.27186
shared B	1	76360001	76400000	-1.22128	-1.26098	-1.22908	-1.32774
shared B	1	76400001	76440000	-1.24489	-1.29117	-1.25606	-1.35117
shared B	1	76440001	76480000	-1.25955	-1.28902	-1.2764	-1.36857
shared B	1	76480001	76520000	-1.26745	-1.29289	-1.2897	-1.35574
shared B	1	76520001	76560000	-1.27922	-1.30728	-1.29663	-1.38961
shared B	1	76560001	76600000	-1.27787	-1.32858	-1.33232	-1.39006
shared B	1	76600001	76640000	-1.27038	-1.3347	-1.34627	-1.38629
shared B	1	76640001	76680000	-1.27608	-1.32032	-1.32461	-1.41217
shared B	1	76680001	76720000	-1.28259	-1.32372	-1.3389	-1.4487
shared B	1	76720001	76760000	-1.27412	-1.32491	-1.35304	-1.46377
shared B	1	76760001	76800000	-1.27573	-1.33592	-1.35121	-1.47817
shared B	1	76800001	76840000	-1.27578	-1.34675	-1.35361	-1.45625
shared B	1	76840001	76880000	-1.28194	-1.34401	-1.35099	-1.46444
shared B	1	76880001	76920000	-1.28749	-1.34618	-1.33851	-1.49672
shared B	1	76920001	76960000	-1.29895	-1.37128	-1.36828	-1.47084
shared B	1	76960001	77000000	-1.30246	-1.38185	-1.37257	-1.46124
shared B	1	77000001	77040000	-1.31047	-1.38186	-1.38092	-1.47072
shared B	1	77040001	77080000	-1.31349	-1.39228	-1.38812	-1.46243
shared B	1	77080001	77120000	-1.30501	-1.39858	-1.38992	-1.46366
shared B	1	77120001	77160000	-1.31106	-1.38456	-1.37643	-1.45716
shared B	1	77160001	77200000	-1.30327	-1.38181	-1.37886	-1.44948
shared B	1	77200001	77240000	-1.28356	-1.36551	-1.36309	-1.41831
shared B	1	77240001	77280000	-1.26505	-1.35106	-1.33976	-1.37308
shared B	1	77280001	77320000	-1.23258	-1.30461	-1.28375	-1.30021
shared B	1	77320001	77360000	-1.20876	-1.25384	-1.23796	-1.25024
shared B	1	77360001	77400000	-1.19022	-1.22228	-1.1918	-1.20497
shared B	1	77400001	77440000	-1.18085	-1.18126	-1.18148	-1.17079
shared B	1	77440001	77480000	-1.15228	-1.16881	-1.14185	-1.12953
shared B	1	77480001	77520000	-1.10104	-1.10465	-1.08676	-1.0928
shared B	1	77520001	77560000	-1.03304	-1.04907	-1.04261	-1.05783
shared B	1	77560001	77600000	-0.939038	-0.955959	-1.02713	-0.970898
shared B	1	77600001	77640000	-0.825887	-0.844296	-0.958774	-0.869983
shared B	1	77640001	77680000	-0.637376	-0.564715	-0.810407	-0.730419
shared B	1	77680001	77720000	-0.361447	-0.272978	-0.604935	-0.513598
shared A	1	77880001	77920000	0.267996	0.418744	-0.110605	0.0751623
shared A	1	77920001	77960000	0.334342	0.482652	-0.0590709	0.159453
shared A	1	77960001	78000000	0.37315	0.51071	0.00236736	0.217503
shared A	1	78000001	78040000	0.42337	0.5585	0.066048	0.271151
shared A	1	78040001	78080000	0.522907	0.640364	0.186448	0.457019
shared A	1	78080001	78120000	0.639382	0.768624	0.337208	0.571239
shared A	1	78120001	78160000	0.77047	0.89681	0.508396	0.707659
shared A	1	78160001	78200000	0.873793	1.00178	0.648673	0.805774
shared A	1	78200001	78240000	0.94787	1.05622	0.750722	0.898262
shared A	1	78240001	78280000	1.00674	1.11465	0.834981	0.950336
shared A	1	78280001	78320000	1.06063	1.18274	0.907338	0.977504
shared A	1	78320001	78360000	1.08735	1.19465	0.951287	0.984947
shared A	1	78360001	78400000	1.09839	1.18639	0.975185	1.0002
shared A	1	78400001	78440000	1.09509	1.17703	0.977483	0.942984
shared A	1	78440001	78480000	1.0957	1.18241	0.944254	0.920832
shared A	1	78480001	78520000	1.07605	1.16895	0.917576	0.786239
shared A	1	78520001	78560000	1.06866	1.11107	0.878931	0.693241
shared A	1	78560001	78600000	1.04822	1.04215	0.84676	0.682728
shared A	1	78600001	78640000	1.01509	1.0138	0.812019	0.643241
shared A	1	78640001	78680000	1.03258	0.993382	0.753981	0.5902
shared A	1	78680001	78720000	1.05039	0.950577	0.650727	0.550032
shared A	1	78720001	78760000	1.05086	0.915969	0.644754	0.52209
shared A	1	78760001	78800000	1.06355	0.922508	0.666048	0.48996
shared A	1	78800001	78840000	1.07195	0.969169	0.709495	0.491435
shared A	1	78840001	78880000	1.06326	0.98715	0.694474	0.473058
shared A	1	78880001	78920000	1.04279	0.963354	0.655216	0.405954
shared A	1	78920001	78960000	0.998736	0.916043	0.653422	0.367958
shared A	1	78960001	79000000	0.939408	0.84534	0.589242	0.325854
shared A	1	79000001	79040000	0.846094	0.770223	0.467994	0.210174
shared A	1	79040001	79080000	0.710222	0.620411	0.337603	0.0741585
shared A	1	79080001	79120000	0.53627	0.431336	0.096976	-0.173068
shared A	1	79120001	79160000	0.331153	0.223096	-0.0950599	-0.376424
shared B	1	79240001	79280000	-0.298723	-0.477819	-0.639491	-0.789334
shared B	1	79280001	79320000	-0.460171	-0.647749	-0.75742	-0.895429
shared B	1	79320001	79360000	-0.570309	-0.754455	-0.794247	-0.957078
shared B	1	79360001	79400000	-0.629776	-0.831653	-0.826026	-0.966974
shared B	1	79400001	79440000	-0.685319	-0.845496	-0.8054	-1.03963
shared B	1	79440001	79480000	-0.733109	-0.861232	-0.81309	-1.05774
shared B	1	79480001	79520000	-0.721808	-0.856112	-0.816823	-1.10089
shared B	1	79520001	79560000	-0.692904	-0.831844	-0.800039	-1.06448
shared B	1	79560001	79600000	-0.663484	-0.840296	-0.811725	-1.05831
shared B	1	79600001	79640000	-0.683679	-0.853568	-0.850861	-1.04044
shared B	1	79640001	79680000	-0.68262	-0.787455	-0.854729	-1.00554
shared B	1	79680001	79720000	-0.708756	-0.794566	-0.86625	-0.983308
shared B	1	79720001	79760000	-0.78676	-0.867227	-0.928387	-1.01025
shared B	1	79760001	79800000	-0.878377	-0.937971	-0.963338	-1.04014
shared B	1	79800001	79840000	-0.947903	-1.01474	-1.04811	-1.12055
shared B	1	79840001	79880000	-0.995018	-1.0434	-1.0839	-1.13065
shared B	1	79880001	79920000	-1.03122	-1.0765	-1.0835	-1.19805
shared B	1	79920001	79960000	-1.08387	-1.14942	-1.10933	-1.22226
shared B	1	79960001	80000000	-1.10568	-1.16213	-1.11563	-1.20229
shared B	1	80000001	80040000	-1.08642	-1.16293	-1.10543	-1.22551
shared B	1	80040001	80080000	-1.06812	-1.15349	-1.12326	-1.24493
shared B	1	80080001	80120000	-1.06237	-1.15036	-1.12112	-1.24856
shared B	1	80120001	80160000	-1.0535	-1.12644	-1.08786	-1.27726
shared B	1	80160001	80200000	-1.02342	-1.10904	-1.11004	-1.26687
shared B	1	80200001	80240000	-1.01849	-1.10257	-1.1224	-1.2904
shared B	1	80240001	80280000	-1.03269	-1.06966	-1.12629	-1.28801
shared B	1	80280001	80320000	-1.03905	-1.0434	-1.14711	-1.26988
shared B	1	80320001	80360000	-1.06211	-1.03163	-1.12713	-1.24931
shared B	1	80360001	80400000	-1.06944	-1.03176	-1.12995	-1.2377
shared B	1	80400001	80440000	-1.08693	-1.08511	-1.14704	-1.26223
shared B	1	80440001	80480000	-1.13121	-1.12339	-1.18069	-1.24225
shared B	1	80480001	80520000	-1.15087	-1.16227	-1.19289	-1.26456
shared B	1	80520001	80560000	-1.14441	-1.18678	-1.18575	-1.26731
shared B	1	80560001	80600000	-1.1389	-1.19074	-1.19853	-1.30676
shared B	1	80600001	80640000	-1.13423	-1.19975	-1.24816	-1.30738
shared B	1	80640001	80680000	-1.14217	-1.20579	-1.24906	-1.34259
shared B	1	80680001	80720000	-1.14505	-1.19821	-1.2315	-1.35176
shared B	1	80720001	80760000	-1.12268	-1.15907	-1.21302	-1.36349
shared B	1	80760001	80800000	-1.10701	-1.13968	-1.17705	-1.35843
shared B	1	80800001	80840000	-1.11133	-1.16792	-1.17942	-1.36451
shared B	1	80840001	80880000	-1.10051	-1.16445	-1.1859	-1.33523
shared B	1	80880001	80920000	-1.10692	-1.15734	-1.16852	-1.35107
shared B	1	80920001	80960000	-1.10331	-1.17082	-1.15406	-1.3407
shared B	1	80960001	81000000	-1.11747	-1.17732	-1.1604	-1.35019
shared B	1	81000001	81040000	-1.13959	-1.19974	-1.1892	-1.39897
shared B	1	81040001	81080000	-1.1586	-1.19574	-1.2118	-1.38195
shared B	1	81080001	81120000	-1.16227	-1.19852	-1.22357	-1.36569
shared B	1	81120001	81160000	-1.16865	-1.20897	-1.25212	-1.38234
shared B	1	81160001	81200000	-1.17103	-1.21317	-1.22756	-1.39766
shared B	1	81200001	81240000	-1.16257	-1.20706	-1.23317	-1.42067
shared B	1	81240001	81280000	-1.16228	-1.20779	-1.22881	-1.41009
shared B	1	81280001	81320000	-1.17033	-1.21904	-1.22262	-1.38586
shared B	1	81320001	81360000	-1.16259	-1.20862	-1.24658	-1.38357
shared B	1	81360001	81400000	-1.14721	-1.19614	-1.21457	-1.37692
shared B	1	81400001	81440000	-1.13245	-1.1849	-1.16827	-1.35876
shared B	1	81440001	81480000	-1.11159	-1.14453	-1.15322	-1.31547
shared B	1	81480001	81520000	-1.09316	-1.06259	-1.09349	-1.24587
shared B	1	81520001	81560000	-1.05203	-1.0012	-1.06428	-1.18704
shared B	1	81560001	81600000	-1.03605	-0.974706	-1.0355	-1.15118
shared B	1	81600001	81640000	-1.01076	-0.954366	-1.01463	-1.13775
shared B	1	81640001	81680000	-1.00212	-0.95691	-1.03058	-1.15489
shared B	1	81680001	81720000	-1.02087	-0.959229	-1.05547	-1.16989
shared B	1	81720001	81760000	-1.04622	-1.02636	-1.07964	-1.24519
shared B	1	81760001	81800000	-1.08023	-1.12169	-1.14479	-1.25586
shared B	1	81800001	81840000	-1.11582	-1.15078	-1.18014	-1.30801
shared B	1	81840001	81880000	-1.13445	-1.15775	-1.16346	-1.31066
shared B	1	81880001	81920000	-1.13967	-1.14578	-1.15404	-1.28476
shared B	1	81920001	81960000	-1.13839	-1.13221	-1.17455	-1.28925
shared B	1	81960001	82000000	-1.13054	-1.10081	-1.17282	-1.28537
shared B	1	82000001	82040000	-1.07811	-0.996861	-1.1283	-1.24439
shared B	1	82040001	82080000	-1.04889	-0.880847	-1.0812	-1.24231
shared B	1	82080001	82120000	-1.02408	-0.859054	-1.05489	-1.14951
shared B	1	82120001	82160000	-0.973383	-0.792198	-1.04436	-1.09595
shared B	1	82160001	82200000	-0.859019	-0.687396	-0.991842	-1.11339
shared B	1	82200001	82240000	-0.712876	-0.572189	-0.930872	-1.11768
shared B	1	82240001	82280000	-0.605604	-0.515191	-0.875785	-1.07463
shared B	1	82280001	82320000	-0.59199	-0.56531	-0.898556	-1.07596
shared B	1	82320001	82360000	-0.616333	-0.660262	-0.91931	-1.12272
shared B	1	82360001	82400000	-0.629178	-0.707533	-0.924056	-1.18225
shared B	1	82400001	82440000	-0.67494	-0.771627	-0.999839	-1.1942
shared B	1	82440001	82480000	-0.797731	-0.915223	-1.0711	-1.23329
shared B	1	82480001	82520000	-0.889851	-0.993155	-1.10603	-1.22415
shared B	1	82520001	82560000	-0.952094	-1.05897	-1.15371	-1.28374
shared B	1	82560001	82600000	-1.01756	-1.09793	-1.15972	-1.28371
shared B	1	82600001	82640000	-1.00476	-1.10676	-1.17274	-1.30699
shared B	1	82640001	82680000	-0.99851	-1.07314	-1.19551	-1.27824
shared B	1	82680001	82720000	-1.00656	-1.05808	-1.14349	-1.26771
shared B	1	82720001	82760000	-1.01113	-1.07006	-1.14819	-1.26791
shared B	1	82760001	82800000	-1.02919	-1.05958	-1.15638	-1.30371
shared B	1	82800001	82840000	-1.01768	-1.02248	-1.13857	-1.28458
shared B	1	82840001	82880000	-0.99783	-1.01338	-1.11358	-1.3211
shared B	1	82880001	82920000	-0.994252	-1.00052	-1.07124	-1.3167
shared B	1	82920001	82960000	-1.01537	-0.98806	-1.04934	-1.32897
shared B	1	82960001	83000000	-0.999894	-0.984976	-1.05344	-1.3517
shared B	1	83000001	83040000	-0.983697	-0.947475	-1.0286	-1.34624
shared B	1	83040001	83080000	-0.925269	-0.937173	-1.03598	-1.34339
shared B	1	83080001	83120000	-0.917861	-0.930876	-1.0771	-1.30699
shared B	1	83120001	83160000	-0.883275	-0.918532	-1.10263	-1.30517
shared B	1	83160001	83200000	-0.830918	-0.882371	-1.13172	-1.319
shared B	1	83200001	83240000	-0.779239	-0.85787	-1.09514	-1.31102
shared B	1	83240001	83280000	-0.761382	-0.811309	-1.07914	-1.28324
shared B	1	83280001	83320000	-0.691295	-0.715499	-1.03116	-1.26927
shared B	1	83320001	83360000	-0.635561	-0.62367	-0.980784	-1.22598
shared B	1	83360001	83400000	-0.551134	-0.540561	-0.901526	-1.22338
A-B	1	83400001	83440000	-0.473105	-0.455798	-0.832874	-1.21472
A-B	1	83440001	83480000	-0.467749	-0.366729	-0.785147	-1.20891
A-B	1	83480001	83520000	-0.39181	-0.323978	-0.767805	-1.11549
shared B	1	83520001	83560000	-0.346721	-0.350731	-0.763649	-1.08613
shared B	1	83560001	83600000	-0.366709	-0.394034	-0.820225	-1.07085
shared B	1	83600001	83640000	-0.424842	-0.464663	-0.855326	-1.10161
shared B	1	83640001	83680000	-0.445934	-0.50509	-0.828086	-1.09558
[truncated: 65,625 more rows]
