# Supplementary material for: The loss of heterochromatin is associated with multiscale three-dimensional genome reorganization and aberrant transcription during cellular senescence
Source: HighWire-hosted journal article supplement (doi:10.1101/gr.275235.121), 2021-06-17
Supplement: Supplemental_Table_S4.xlsx [file Supplemental_Table_S4.xlsx]

## Sheet: B-to-A_BP
Table S4: GO terms of genes within switching compartment bins with DAVID.
Category	Term	Count	%	PValue	Genes	List Total	Pop Hits	Pop Total	Fold Enrichment	Bonferroni	Benjamini	FDR
GOTERM_BP_DIRECT	GO:0060333~interferon-gamma-mediated signaling pathway	14	1.8543	3.91041e-06	HLA-H, SP100, OAS3, HLA-A, TRIM26, OAS1, OAS2, HLA-F, B2M, TRIM38, IRF2, HLA-DPA1, HLA-DPB1, IFNGR1	670	71	16792	4.94194	0.00976327	0.00976327	0.00690097
GOTERM_BP_DIRECT	GO:0060337~type I interferon signaling pathway	10	1.3245	0.000929126	HLA-H, SP100, OAS3, HLA-A, IRF2, OAS1, XAF1, OAS2, HLA-F, ADAR	670	64	16792	3.91604	0.902924	0.68843	1.62712
GOTERM_BP_DIRECT	GO:0006396~RNA processing	12	1.5894	0.00163793	PABPN1, SFSWAP, CHERP, LARP7, HNRNPF, DICER1, U2SURP, MPHOSPH10, DHX40, DUSP11, DDX54, ADAR	670	97	16792	3.10054	0.98364	0.746141	2.85158
GOTERM_BP_DIRECT	GO:0030433~ER-associated ubiquitin-dependent protein catabolic process	9	1.19205	0.00249874	UBE4A, RNF103, VCP, WFS1, UBE2G2, PSMC1, FBXO2, FBXO6, UBE2J1	670	60	16792	3.7594	0.998121	0.791808	4.3193
GOTERM_BP_DIRECT	GO:0006412~translation	21	2.78146	0.00283941	RPSA, MRPS33, HBS1L, MRPS5, RPS9, RPL6, SLC25A23, RPL34, RPLP1, MRPL36, RPS12, SLC25A38, SLC25A28, MRPL55, RPS13, MRPL18, RPL7A, TNIP1, NHP2, METTL17, RMND1	670	253	16792	2.0803	0.999203	0.759934	4.89435
GOTERM_BP_DIRECT	GO:0000398~mRNA splicing, via spliceosome	19	2.51656	0.00345816	BCAS2, PABPN1, PRPF31, LSM6, ELAVL1, XAB2, YBX1, PAPOLA, PPIH, PLRG1, FRG1, GTF2F1, HNRNPF, CDC40, SNRPB, LSM5, HNRNPC, DHX32, SNRPG	670	222	16792	2.145	0.999832	0.7651	5.9305
GOTERM_BP_DIRECT	GO:0002480~antigen processing and presentation of exogenous peptide antigen via MHC class I, TAP-independent	4	0.529801	0.0044165	HLA-H, HLA-A, HLA-F, B2M	670	9	16792	11.139	0.999985	0.795361	7.5143
GOTERM_BP_DIRECT	GO:0006754~ATP biosynthetic process	6	0.794702	0.00530456	PRKAG2, ATP5F1, ATP5L, ATP5I, SURF1, ATP5J	670	29	16792	5.18538	0.999998	0.811389	8.95946
GOTERM_BP_DIRECT	GO:0002474~antigen processing and presentation of peptide antigen via MHC class I	6	0.794702	0.00616071	HLA-H, SEC24B, HLA-A, SEC13, HLA-F, B2M	670	30	16792	5.01254	1	0.821431	10.3325
GOTERM_BP_DIRECT	GO:0042776~mitochondrial ATP synthesis coupled proton transport	5	0.662252	0.00869959	ATP5F1, ATP5L, ATP5I, COX5B, ATP5J	670	21	16792	5.96731	1	0.888338	14.2903
GOTERM_BP_DIRECT	GO:0036498~IRE1-mediated unfolded protein response	8	1.0596	0.0087276	DNAJB11, DDX11, WFS1, SRPRB, SEC62, SEC63, CXXC1, SERP1	670	59	16792	3.39833	1	0.864587	14.333
GOTERM_BP_DIRECT	GO:0039702~viral budding via host ESCRT complex	5	0.662252	0.0103039	CHMP1B, CHMP3, TSG101, VPS37C, MITD1	670	22	16792	5.69607	1	0.885312	16.7056
GOTERM_BP_DIRECT	GO:0035413~positive regulation of catenin import into nucleus	4	0.529801	0.0105789	SULF2, SFRP2, EGF, KANK1	670	12	16792	8.35423	1	0.8716	17.1131
GOTERM_BP_DIRECT	GO:1901796~regulation of signal transduction by p53 class mediator	12	1.5894	0.0106651	TP53RK, CSNK2A2, TAF2, RFC4, CSNK2A1, HIPK1, PRKAG2, HIPK2, TBP, TOPBP1, ATR, MDM4	670	124	16792	2.42542	1	0.853627	17.2404
GOTERM_BP_DIRECT	GO:0051603~proteolysis involved in cellular protein catabolic process	7	0.927152	0.0115622	ADAMTS7, CTSL, PSMB1, CLPP, CTSA, CAPN2, CTSH	670	48	16792	3.65498	1	0.857046	18.5549
GOTERM_BP_DIRECT	GO:0006614~SRP-dependent cotranslational protein targeting to membrane	10	1.3245	0.012554	RPSA, RPL6, RPL34, RPLP1, RPS12, RPS13, RPS9, SRPRB, RPL7A, SEC63	670	94	16792	2.66624	1	0.862081	19.9853
GOTERM_BP_DIRECT	GO:0006281~DNA repair	18	2.38411	0.0132171	APEX2, ERCC6L2, TFPT, UNG, TOPBP1, BCCIP, TRRAP, DMAP1, ATR, GTF2H1, DDX11, VCP, FBXO6, MTOR, PARP4, PARP1, ALKBH2, INO80C	670	235	16792	1.9197	1	0.85966	20.9281
GOTERM_BP_DIRECT	GO:0030837~negative regulation of actin filament polymerization	4	0.529801	0.013351	BBS4, MYADM, ARFGEF1, KANK1	670	13	16792	7.7116	1	0.846417	21.1173
GOTERM_BP_DIRECT	GO:0097352~autophagosome maturation	5	0.662252	0.0162203	CHMP3, VCP, TSG101, MCOLN1, TECPR1	670	25	16792	5.01254	1	0.884616	25.0693
GOTERM_BP_DIRECT	GO:0046686~response to cadmium ion	5	0.662252	0.0162203	MAPK9, CYB5A, SPARC, SOD2, B2M	670	25	16792	5.01254	1	0.884616	25.0693
GOTERM_BP_DIRECT	GO:0006367~transcription initiation from RNA polymerase II promoter	13	1.72185	0.0185784	TAF2, TBX5, TAF7, TBP, MED23, MED13, MED10, NR2C2, GTF2H1, NR1H2, MED6, MED4, GTF2F1	670	152	16792	2.14352	1	0.904877	28.1767
GOTERM_BP_DIRECT	GO:0006915~apoptotic process	34	4.50331	0.0186472	ZFAND6, BCLAF1, CHMP3, PDCD2, CSNK2A2, CASP6, CASP3, DOCK1, CSNK2A1, ATG5, UNC5B, TRIM69, PTK2B, CASP7, PAK4, XAF1, MAP2K7, CKAP2, ACTC1, TFPT, CST3, DUSP22, MUL1, STK4, ELMO2, DAPK1, RNF130, TRIM35, DRAM2, SFRP2, CSRNP1, SIAH2, CTSH, TRIM39	670	567	16792	1.50288	1	0.894488	28.2654
GOTERM_BP_DIRECT	GO:0006413~translational initiation	12	1.5894	0.0211153	RPSA, RPL6, RPL34, EIF4A2, EIF3F, RPLP1, RPS12, RPS13, RPS9, EIF1B, RPL7A, EIF2B3	670	137	16792	2.19527	1	0.912305	31.3836
GOTERM_BP_DIRECT	GO:0019882~antigen processing and presentation	7	0.927152	0.0216519	CTSL, HLA-H, RAB4A, HLA-A, HLA-DPA1, HLA-DPB1, CTSH	670	55	16792	3.1898	1	0.908176	32.0444
GOTERM_BP_DIRECT	GO:0033617~mitochondrial respiratory chain complex IV assembly	4	0.529801	0.0239272	COA5, SURF1, TIMM21, PET100	670	16	16792	6.26567	1	0.920485	34.7802
GOTERM_BP_DIRECT	GO:0006364~rRNA processing	16	2.11921	0.0245948	RPSA, RPP21, MPHOSPH10, RPS9, LAS1L, DIS3L, FRG1, RPL6, RPL34, RPLP1, RPS12, RPS13, NOP56, RPL7A, MDN1, UTP14C	670	214	16792	1.87385	1	0.917849	35.563
GOTERM_BP_DIRECT	GO:0009791~post-embryonic development	8	1.0596	0.0259701	TAPT1, IGF2R, CSRNP1, DHCR7, SMAD2, MTOR, SERP1, SOD2	670	73	16792	2.7466	1	0.921073	37.1477
GOTERM_BP_DIRECT	GO:0006888~ER to Golgi vesicle-mediated transport	13	1.72185	0.0265115	SEC24B, IER3IP1, WHAMM, MPPE1, CD55, COG6, VCP, ANK2, TRAPPC8, TMED3, GORASP1, TBC1D20, TEX261	670	160	16792	2.03634	1	0.917656	37.7614
GOTERM_BP_DIRECT	GO:0000281~mitotic cytokinesis	5	0.662252	0.0268861	CKAP2, KIF23, BBS4, MITD1, APC	670	29	16792	4.32115	1	0.913028	38.1827
GOTERM_BP_DIRECT	GO:0006661~phosphatidylinositol biosynthetic process	7	0.927152	0.0273792	ARF1, SYNJ1, PI4K2B, INPP4A, MTMR6, FIG4, PIK3R4	670	58	16792	3.02481	1	0.909445	38.7332
GOTERM_BP_DIRECT	GO:0030913~paranodal junction assembly	3	0.397351	0.0291311	ANK2, NFASC, GNPAT	670	7	16792	10.7412	1	0.915628	40.6519
GOTERM_BP_DIRECT	GO:0006362~transcription elongation from RNA polymerase I promoter	5	0.662252	0.0300746	ERCC6, POLR1D, TBP, ZNRD1, GTF2H1	670	30	16792	4.17711	1	0.915538	41.6615
GOTERM_BP_DIRECT	GO:0019886~antigen processing and presentation of exogenous peptide antigen via MHC class II	9	1.19205	0.0302422	KIF23, CTSL, SEC24B, ARF1, ACTR1B, SEC13, HLA-DPA1, HLA-DPB1, HLA-DMA	670	92	16792	2.45178	1	0.909985	41.8392
GOTERM_BP_DIRECT	GO:0043161~proteasome-mediated ubiquitin-dependent protein catabolic process	15	1.98675	0.0328898	ANAPC4, NSFL1C, RNF187, TRIM38, PSMF1, KCTD10, PSMB1, VCP, UBXN2B, RMND5B, PSMC1, HECTD3, SIAH2, KLHL20, APC	670	203	16792	1.85192	1	0.921344	44.5788
GOTERM_BP_DIRECT	GO:0036258~multivesicular body assembly	5	0.662252	0.0334768	CHMP1B, CHMP3, TSG101, VPS37C, VPS36	670	31	16792	4.04237	1	0.91895	45.1695
GOTERM_BP_DIRECT	GO:0019083~viral transcription	10	1.3245	0.034827	RPSA, NUP133, RAE1, RPL6, RPL34, RPLP1, RPS12, RPS13, RPS9, RPL7A	670	112	16792	2.23774	1	0.921221	46.5056
GOTERM_BP_DIRECT	GO:0032981~mitochondrial respiratory chain complex I assembly	7	0.927152	0.0389924	NDUFS6, NDUFA3, NDUFB8, NDUFA10, NDUFA12, TIMM21, NDUFS1	670	63	16792	2.78474	1	0.93746	50.4369
GOTERM_BP_DIRECT	GO:0002479~antigen processing and presentation of exogenous peptide antigen via MHC class I, TAP-dependent	7	0.927152	0.0389924	HLA-H, PSMF1, PSMB1, PSMC1, HLA-A, HLA-F, B2M	670	63	16792	2.78474	1	0.93746	50.4369
GOTERM_BP_DIRECT	GO:0006461~protein complex assembly	10	1.3245	0.0421272	PPIH, PTK2B, WASF1, SLC2A1, VAMP3, MDM4, CD40, TUBGCP2, MDN1, APC	670	116	16792	2.16058	1	0.945991	53.214
GOTERM_BP_DIRECT	GO:0016925~protein sumoylation	10	1.3245	0.0441016	SUMO3, NUP133, SP100, RAE1, CBX4, MUL1, PIAS2, HNRNPC, SCMH1, PARP1	670	117	16792	2.14211	1	0.949107	54.887
GOTERM_BP_DIRECT	GO:0006139~nucleobase-containing compound metabolic process	6	0.794702	0.0446219	DDX11, CRMP1, OAS3, ZNRD1, OAS2, PRPS2	670	49	16792	3.0689	1	0.946959	55.3184
GOTERM_BP_DIRECT	GO:0006120~mitochondrial electron transport, NADH to ubiquinone	6	0.794702	0.0446219	NDUFS6, NDUFA3, NDUFB8, NDUFA10, NDUFA12, NDUFS1	670	49	16792	3.0689	1	0.946959	55.3184
GOTERM_BP_DIRECT	GO:0045494~photoreceptor cell maintenance	5	0.662252	0.0449765	BBS4, TUB, DRAM2, ERCC6, CROCC	670	34	16792	3.68569	1	0.944232	55.6102
GOTERM_BP_DIRECT	GO:0016070~RNA metabolic process	3	0.397351	0.047377	DDX24, DUSP11, DDX54	670	9	16792	8.35423	1	0.948706	57.5387
GOTERM_BP_DIRECT	GO:0055114~oxidation-reduction process	33	4.37086	0.0478749	GLRX5, SC5D, CYB5R2, HSD17B12, DHRS4L2, CHCHD4, FAR1, UEVLD, HIF1AN, DHCR7, GPX3, CREG1, KDM3A, MICAL1, AKR1C1, HIGD1A, ALKBH7, CTBP2, DHRS12, PCBD1, CYB5A, NDUFA10, SOD2, ADO, PHF2, DHRS4, PRDX6, AKR1B1, TXNRD3, KDM4C, PCYOX1, SURF1, SRXN1	670	592	16792	1.39708	1	0.946639	57.9286
GOTERM_BP_DIRECT	GO:0000184~nuclear-transcribed mRNA catabolic process, nonsense-mediated decay	10	1.3245	0.0482342	RPSA, RPL6, SMG8, RPL34, RPLP1, RPS12, RPS13, RPS9, RPL7A, PPP2R2A	670	119	16792	2.10611	1	0.94412	58.2079
GOTERM_BP_DIRECT	GO:0006921~cellular component disassembly involved in execution phase of apoptosis	4	0.529801	0.0490981	CASP6, CASP3, CASP7, APC	670	21	16792	4.77385	1	0.943345	58.8724
GOTERM_BP_DIRECT	GO:0043488~regulation of mRNA stability	9	1.19205	0.0532197	ZFP36, PSMF1, PSMB1, SERBP1, PSMC1, KHSRP, YWHAB, ELAVL1, SAMD4B	670	103	16792	2.18994	1	0.952602	61.9075
GOTERM_BP_DIRECT	GO:0008593~regulation of Notch signaling pathway	3	0.397351	0.0576903	CD46, SYNJ2BP, GALNT11	670	10	16792	7.51881	1	0.960877	64.9601
GOTERM_BP_DIRECT	GO:2000036~regulation of stem cell population maintenance	3	0.397351	0.0576903	CNOT3, ELAVL1, KDM3A	670	10	16792	7.51881	1	0.960877	64.9601
GOTERM_BP_DIRECT	GO:0001836~release of cytochrome c from mitochondria	4	0.529801	0.0616938	MFF, CLU, ST20, SOD2	670	23	16792	4.35873	1	0.966606	67.4965
GOTERM_BP_DIRECT	GO:0090502~RNA phosphodiester bond hydrolysis, endonucleolytic	6	0.794702	0.0672688	RNASEK, RPP21, RNASET2, DICER1, RNASEH2B, TSEN34	670	55	16792	2.73411	1	0.973749	70.7413
GOTERM_BP_DIRECT	GO:0008380~RNA splicing	12	1.5894	0.0683206	BCAS2, USB1, LSM6, CDC40, KHSRP, SNRPB, MPHOSPH10, ZNF638, HNRNPC, WTAP, THOC3, SNRPG	670	166	16792	1.81176	1	0.973312	71.3182
GOTERM_BP_DIRECT	GO:0006559~L-phenylalanine catabolic process	3	0.397351	0.0686941	PCBD1, GSTZ1, FAH	670	11	16792	6.83528	1	0.971877	71.5204
GOTERM_BP_DIRECT	GO:0033169~histone H3-K9 demethylation	3	0.397351	0.0686941	PHF2, KDM4C, KDM3A	670	11	16792	6.83528	1	0.971877	71.5204
GOTERM_BP_DIRECT	GO:0015031~protein transport	23	3.04636	0.0718984	BBS4, CHMP3, TSG101, RAB4A, UNC50, STXBP2, VPS37C, ARFGEF1, SFT2D1, UEVLD, COG6, CHMP1B, DNAJC13, ARF1, TMED3, DGKD, GORASP1, ATG16L1, AGAP1, SLC15A3, KLHL20, EXOC1, SERP1	670	395	16792	1.45935	1	0.974542	73.201
GOTERM_BP_DIRECT	GO:0030218~erythrocyte differentiation	5	0.662252	0.0737502	CASP3, SMAD5, HIPK2, SLC25A38, ADAR	670	40	16792	3.13284	1	0.97519	74.1292
GOTERM_BP_DIRECT	GO:0008654~phospholipid biosynthetic process	5	0.662252	0.0737502	CEPT1, SERINC5, MBOAT7, ABHD5, AGPAT1	670	40	16792	3.13284	1	0.97519	74.1292
GOTERM_BP_DIRECT	GO:0006407~rRNA export from nucleus	2	0.264901	0.0780958	RPSA, TSC1	670	2	16792	25.0627	1	0.978707	76.1896
GOTERM_BP_DIRECT	GO:0071174~mitotic spindle checkpoint	2	0.264901	0.0780958	CSNK2A2, CSNK2A1	670	2	16792	25.0627	1	0.978707	76.1896
GOTERM_BP_DIRECT	GO:0060700~regulation of ribonuclease activity	2	0.264901	0.0780958	OAS3, OAS1	670	2	16792	25.0627	1	0.978707	76.1896
GOTERM_BP_DIRECT	GO:0000430~regulation of transcription from RNA polymerase II promoter by glucose	2	0.264901	0.0780958	USF1, USF2	670	2	16792	25.0627	1	0.978707	76.1896
GOTERM_BP_DIRECT	GO:0071712~ER-associated misfolded protein catabolic process	3	0.397351	0.0803171	POMT2, VCP, RNF5	670	12	16792	6.26567	1	0.979558	77.1821
GOTERM_BP_DIRECT	GO:0042407~cristae formation	3	0.397351	0.0803171	SAMM50, CHCHD3, CHCHD6	670	12	16792	6.26567	1	0.979558	77.1821
GOTERM_BP_DIRECT	GO:0016236~macroautophagy	7	0.927152	0.0821584	LAMTOR3, ATG5, PRKAG2, MTOR, OPTN, ATG16L1, PIK3R4	670	76	16792	2.30841	1	0.979977	77.975
GOTERM_BP_DIRECT	GO:0072661~protein targeting to plasma membrane	4	0.529801	0.0830689	ANK2, NFASC, MYADM, EHD3	670	26	16792	3.8558	1	0.979462	78.3574
GOTERM_BP_DIRECT	GO:0006914~autophagy	10	1.3245	0.0842924	DRAM2, CHMP3, ATG5, VCP, TSG101, VPS37C, TECPR1, MTOR, OPTN, VPS36	670	133	16792	1.88441	1	0.979269	78.8615
GOTERM_BP_DIRECT	GO:0035338~long-chain fatty-acyl-CoA biosynthetic process	5	0.662252	0.0849945	ACSL1, ACOT8, HSD17B12, PPT2, ELOVL6	670	42	16792	2.98365	1	0.978559	79.1457
GOTERM_BP_DIRECT	GO:0043433~negative regulation of sequence-specific DNA binding transcription factor activity	6	0.794702	0.0901987	HDAC4, SP100, ID2, WFS1, PIAS2, MAD2L2	670	60	16792	2.50627	1	0.982045	81.1427
GOTERM_BP_DIRECT	GO:0034613~cellular protein localization	5	0.662252	0.0909118	RAP2A, LAMTOR3, NIPBL, ANK2, AHI1	670	43	16792	2.91427	1	0.98142	81.4019
GOTERM_BP_DIRECT	GO:0045429~positive regulation of nitric oxide biosynthetic process	5	0.662252	0.0909118	PTK2B, CLU, MTOR, INSR, SOD2	670	43	16792	2.91427	1	0.98142	81.4019
GOTERM_BP_DIRECT	GO:0051492~regulation of stress fiber assembly	3	0.397351	0.0924928	BBS4, TSC1, ALMS1	670	13	16792	5.7837	1	0.981536	81.9645
GOTERM_BP_DIRECT	GO:1902600~hydrogen ion transmembrane transport	6	0.794702	0.095214	SLC36A1, COX7A1, COX6B1, CYB5A, COX7A2L, SURF1	670	61	16792	2.46518	1	0.982561	82.8955
GOTERM_BP_DIRECT	GO:0006950~response to stress	6	0.794702	0.095214	TP53I11, PTK2B, AKR1B1, MAPK9, MTOR, SERP1	670	61	16792	2.46518	1	0.982561	82.8955
GOTERM_BP_DIRECT	GO:0051260~protein homooligomerization	12	1.5894	0.0967447	ANXA6, KCTD10, MFF, VCP, DGKD, C1QTNF1, CLPP, CLDN1, ATG16L1, EHD3, AKR1C1, SOD2	670	177	16792	1.69917	1	0.982617	83.399
GOTERM_BP_DIRECT	GO:0006635~fatty acid beta-oxidation	5	0.662252	0.0970204	ACAA2, ECHS1, PEX5, ACAT2, HADH	670	44	16792	2.84803	1	0.981701	83.4882
GOTERM_BP_DIRECT	GO:0006351~transcription, DNA-templated	90	11.9205	0.0973039	MORF4L1, CNOT3, CBX4, ZXDC, ZNF827, DMAP1, ZNF638, MED22, KANK1, ZNF343, CSNK2A2, ARHGAP22, SFSWAP, ZNF777, SIN3B, CSNK2A1, HIF1AN, DDX11, MIER1, MED29, HOMEZ, ZNF397, ZNF395, ZNF721, INO80C, SAMD4B, SP100, CTBP2, TFPT, PCBD1, POLR1D, FOXJ3, LPIN1, ZNF335, GZF1, GTF2H1, MED6, ZNF195, HIPK1, TRIM33, FAM120B, ZNF197, ZNF888, NCOA5, HIPK2, KHSRP, PIAS2, LCOR, MAD2L2, ZFP62, BCLAF1, ZNF468, KMT2C, CH…	670	1955	16792	1.15378	1	0.980773	83.5795
GOTERM_BP_DIRECT	GO:0000387~spliceosomal snRNP assembly	4	0.529801	0.0988379	WDR77, SNRPB, GEMIN8, SNRPG	670	28	16792	3.58038	1	0.980865	84.065
GOTERM_BP_DIRECT	GO:0051881~regulation of mitochondrial membrane potential	4	0.529801	0.0988379	SPG20, MUL1, NDUFS1, SOD2	670	28	16792	3.58038	1	0.980865	84.065
GOTERM_BP_DIRECT	GO:0006378~mRNA polyadenylation	4	0.529801	0.0988379	PAPOLA, CPSF6, PAF1, PABPC1L	670	28	16792	3.58038	1	0.980865	84.065

## Sheet: B-to-A_CC
Category	Term	Count	%	PValue	Genes	List Total	Pop Hits	Pop Total	Fold Enrichment	Bonferroni	Benjamini	FDR
GOTERM_CC_DIRECT	GO:0005654~nucleoplasm	167	22.1192	7.29901e-09	MORF4L1, PPP1R26, CNDP2, SURF6, LSM6, CBX4, MED23, TBP, PNISR, ZNF638, WTAP, CSNK2A2, SIN3B, CSNK2A1, DDX11, MIER1, MED29, WDR77, LSM5, HADH, PABPN1, RPP21, TFPT, PCBD1, RREB1, GABPA, ANAPC4, MTA3, SECISBP2, TOPBP1, MED13, OPTN, MED10, RFC4, UHRF2, TRIM33, NAV2, RPS12, SNRPB, MAPK9, RPS13, PIAS2, TFAP2C, PAF1, MAD2L2, SNRPG, SSH1, OAS3, ZNRD1, CTSA, TRRAP, ARFGEF1, XAB2, NR2C2, CXXC1, NR1H2, DOCK…	715	2784	18224	1.52892	3.91226e-06	3.91226e-06	1.06136e-05
GOTERM_CC_DIRECT	GO:0005730~nucleolus	62	8.21192	4.78394e-06	PPP1R26, SURF6, TSG101, GAR1, LSM6, LYAR, STK35, MRPS31, DDX11, PLRG1, RAE1, DDX24, HOMEZ, ZNF146, FBXO25, MDN1, INO80C, ELP3, SP100, TFPT, RREB1, TRIM41, LAS1L, PPP1CC, GZF1, RPS13, SURF2, NHP2, FBXO11, BCLAF1, APEX2, ZNRD1, ZNF655, SP110, ACAT2, ARFGEF1, ERCC6, TCERG1, TRIM69, FRG1, RPL34, RPL7A, TSEN34, PINX1, BCAS2, ZNF622, MPHOSPH10, SPTY2D1, RPS9, RPF2, PHF2, TDP2, BTBD10, NGDN, RBM19, NOP5…	715	857	18224	1.84395	0.00256091	0.00128128	0.00695616
GOTERM_CC_DIRECT	GO:0005739~mitochondrion	86	11.3907	4.94226e-06	CYB5R2, ERCC6L2, MRPS33, GM2A, PEX5, C6ORF203, COX5B, MRPS31, C14ORF2, GOT1, ACOT8, MCCC1, TCAIM, GSTZ1, GNPAT, ATP5L, HADH, SUCLA2, ATP5I, CDK5RAP1, DHX32, NDUFS1, RMND1, ATP5J, ACAA2, LYRM2, GTPBP8, SECISBP2, MRPS5, SYNJ2BP, PPP1CC, TIMM44, ADO, DHRS4, ALDH1B1, CLPP, TXNRD3, MAPK9, G0S2, TFAP2C, ADAM12, TRIM39, GLRX5, APEX2, SAMM50, NDUFB8, ACP6, UNG, CLU, UROS, CHCHD3, ECHS1, OAS1, OAS2, CHCHD…	715	1331	18224	1.64687	0.00264555	0.000882629	0.00718636
GOTERM_CC_DIRECT	GO:0005829~cytosol	177	23.4437	6.67822e-06	CTNNAL1, S100A6, CHMP3, CNDP2, LSM6, CNOT3, PPCS, PI4K2B, LZTFL1, FAH, CSNK2A2, CSNK2A1, GOT1, ATG5, ANK2, UBXN2B, WDR77, SLC2A1, RPLP1, LSM5, EIF2B3, MAP2K7, NUP133, TUB, PCBD1, TTC7B, ANAPC4, NUDT5, OPTN, PPP1CC, STK4, TRIM38, FGFR1OP, IGBP1, RPS12, TRAPPC5, SNRPB, MAPK9, RPS13, MVK, VAMP3, TRIM39, SRXN1, SNRPG, FUOM, BBS4, EEF1B2, MYL5, CLU, OAS3, MYO9B, OAS1, BCL2L2, OAS2, NAGK, ARFGEF1, ANGE…	715	3315	18224	1.3609	0.00357314	0.000894484	0.00971045
GOTERM_CC_DIRECT	GO:0043231~intracellular membrane-bounded organelle	43	5.69536	4.2431e-05	CCZ1B, SC5D, APEX2, AGFG1, ABHD5, OAS3, PPT2, CTSA, ZNF638, MITD1, OAS2, ITM2B, YBX1, NOV, PPP1R3B, DNAJC13, TRIM69, CASP7, DHCR7, ZFYVE16, TRIP10, FYCO1, INSR, PINX1, RAB4A, MTA3, ACKR3, CYB5A, ATP1A1, CD40, USF2, AGTRAP, DRAM2, DHRS4, TRIM33, VCP, ALDH1B1, GTF2F1, SPATA18, SEC13, VAMP3, SIAH2, SLC15A3	715	558	18224	1.96414	0.0224868	0.00453837	0.0616818
GOTERM_CC_DIRECT	GO:0005737~cytoplasm	252	33.3775	7.03082e-05	CCZ1B, S100A6, CROCC, PNISR, ZNF638, MED22, TPD52, B2M, NOV, GOLGA8B, SIN3B, GOT1, DDX11, RAE1, WDR77, RPLP1, ZNF397, ARHGEF40, ZNF395, MAP2K7, GOLGA8A, EIF2B3, DHX32, RNF220, TFPT, RREB1, PCBD1, UBE2J1, OPTN, CD40, SERBP1, MAD2L2, SLC2A10, TDRD7, ACP6, CHCHD3, OAS3, OAS1, MYO9B, OAS2, DENND2D, ACAT2, ARFGEF1, PDSS2, NR1H2, VRK3, CRMP1, CDC123, FBXO6, IQSEC1, HNRNPAB, ZNF622, RPSA, FBXO2, SMAD5, …	715	5222	18224	1.22999	0.0369852	0.0062614	0.102187
GOTERM_CC_DIRECT	GO:0005732~small nucleolar ribonucleoprotein complex	6	0.794702	9.01222e-05	LSM6, SNRPB, MPHOSPH10, NOP56, NHP2, SNRPG	715	13	18224	11.7637	0.0471594	0.00687734	0.130968
GOTERM_CC_DIRECT	GO:0005743~mitochondrial inner membrane	35	4.63576	0.000142412	MRPS33, SAMM50, NDUFB8, CHCHD3, COX7A2L, MRPS31, CHCHD6, COX5B, NDUFS6, MTG1, MCCC1, SLC25A23, MRPL36, COX6B1, EXOG, SLC25A28, MRPL18, MRPL55, ATP5L, HADH, ATP5I, HIGD1A, ATP5J, ACAA2, NDUFA3, MRPS22, ATP5F1, MPC1, MRPS5, NDUFA10, TIMM44, NDUFA12, SOD2, SLC25A38, SURF1	715	441	18224	2.02287	0.0734971	0.00949688	0.206883
GOTERM_CC_DIRECT	GO:0016020~membrane	120	15.894	0.000144106	CHERP, AP1G2, HBS1L, DNAJB14, PI4K2B, TSNARE1, B2M, DNAJB11, ATG5, SLC2A1, PRRT1, DDX24, INSR, NUP133, SLC33A1, UBIAD1, HLA-A, MED13, SIRPA, PNPLA3, IL11RA, PNPLA6, HLA-F, TMEM131, MGAT1, SERBP1, RPS12, RPS13, PAF1, BBS4, CTSA, MYO9B, OAS2, FXYD5, XAB2, LGALS3BP, DOCK1, RPL6, HNRNPF, EIF3F, HLA-DPB1, RPL7A, HNRNPC, IQSEC1, RPSA, MUL1, RPS9, PDZD8, TSC1, CD58, PSMC1, MTOR, PARP4, ALG11, PARP1, DDX…	715	2200	18224	1.39026	0.0743385	0.00854623	0.209343
GOTERM_CC_DIRECT	GO:0016607~nuclear speck	20	2.64901	0.000362674	NXT1, PABPN1, ZC3H13, PRPF31, BCLAF1, RREB1, CBX4, PNISR, ZNF638, DUSP11, PPP1CC, WTAP, MBD1, CXXC1, PPIH, HIPK1, PLRG1, TRIM69, PIAS2, THOC3	715	201	18224	2.53613	0.176695	0.0192551	0.526077
GOTERM_CC_DIRECT	GO:0005634~nucleus	252	33.3775	0.000796945	S100A6, ZNF638, WTAP, SFSWAP, ZNF777, SIN3B, GOT1, DDX11, DNAJB11, RAE1, CLK4, WDR77, LSM5, ZNF397, H2AFZ, ZNF395, TLK2, MAP2K7, TFPT, RREB1, ANAPC4, OPTN, MED13, UHRF2, PARP12, SERBP1, RPS13, PIAS2, SURF2, MAD2L2, CHCHD3, ZNF511, OAS1, DUSP11, OAS2, ACAT2, XAB2, ANGEL1, NR1H2, VRK3, IQSEC1, HNRNPAB, RPSA, SMAD5, RPS9, ALMS1, DUSP22, SMAD2, SMAD1, RPF2, USF1, USF2, PTPN11, CSRNP1, BTBD10, PARP4, …	715	5415	18224	1.18615	0.347754	0.0381035	1.15262
GOTERM_CC_DIRECT	GO:0005764~lysosome	20	2.64901	0.00150683	CST3, PPT2, CTSA, CD164, ENGASE, CAPN2, TPCN1, WDR48, GNS, CTSL, DRAM2, GOT1, PRDX6, RNASET2, MTOR, PCYOX1, TRIP10, CTSH, VPS36, FYCO1	715	226	18224	2.25559	0.554372	0.0651377	2.16889
GOTERM_CC_DIRECT	GO:0070062~extracellular exosome	139	18.4106	0.00240883	S100A6, CHMP3, PLXNA1, CROCC, CNDP2, LSM6, HBS1L, PPCS, COX5B, B2M, FAH, GOT1, DDX11, CD46, SLC2A1, TGFBI, RPLP1, H2AFZ, INSR, ACAA2, PCBD1, RREB1, NUDT5, HLA-A, CST3, TMEM132A, CD40, SIRPA, MGAT1, GNS, GGACT, SERBP1, SNRPB, RPS13, MVK, PRPS2, ACTR3B, CLU, CHCHD3, PPT2, CTSA, BCL2L2, NAGK, TIMP2, ACAT2, SERINC5, LGALS3BP, NIPBL, PSMB1, HNRNPC, RPL7A, EGF, RPSA, LAMTOR3, FBXO2, CD276, RPS9, PPA2, …	715	2811	18224	1.26035	0.725469	0.0946537	3.44616
GOTERM_CC_DIRECT	GO:0010008~endosome membrane	17	2.25166	0.00258035	LAMTOR3, AP1G2, TSG101, VPS37C, CD164, APPL1, ITM2B, FIG4, DTNBP1, TPCN1, CHMP1B, DNAJC13, MCOLN1, HLA-DPA1, HLA-DPB1, INSR, EHD3	715	185	18224	2.34215	0.749641	0.0941834	3.68728
GOTERM_CC_DIRECT	GO:0005783~endoplasmic reticulum	50	6.62252	0.00261456	SLC36A1, IER3IP1, WFS1, UBE2G2, TPD52, POMGNT2, DNAJB11, RNF103, PIGG, UBXN2B, INSIG1, ELOVL6, IFNGR1, AGPAT1, UBIAD1, CST3, HLA-A, TMEM132A, PNPLA6, HLA-F, ZFYVE27, TXNRD3, TRAPPC5, SERP1, EEF1B2, ADPGK, NDUFB8, CLU, CTSA, OAS1, CERS4, OAS2, ANGEL1, SEC62, SEC63, PSMF1, MPPE1, TMED3, PLA2G12A, DHCR7, SLC35B4, APMAP, FBXO2, ATP1A1, FIG4, CAPN2, DBI, VCP, SULF2, TBC1D20	715	828	18224	1.53914	0.754201	0.0893069	3.7353
GOTERM_CC_DIRECT	GO:0005925~focal adhesion	28	3.70861	0.0032892	KIF23, WASF1, B2M, ANXA6, ARHGAP22, SORBS2, PTK2B, RPL6, CD46, PAK4, RPLP1, RPL7A, EHD3, ACTC1, LAMTOR3, YWHAB, NFASC, RPS9, ARHGAP24, CAPN2, PPP1CC, ANXA5, ARF1, IGF2R, CD81, IRF2, RPS13, LCP1	715	391	18224	1.82524	0.82897	0.104497	4.67781
GOTERM_CC_DIRECT	GO:0012507~ER to Golgi transport vesicle membrane	8	1.0596	0.00396997	HLA-H, SEC24B, HLA-A, SEC13, HLA-DPA1, HLA-DPB1, HLA-F, B2M	715	52	18224	3.92125	0.881417	0.117874	5.62017
GOTERM_CC_DIRECT	GO:0005741~mitochondrial outer membrane	14	1.8543	0.00581627	SAMM50, WASF1, FUNDC1, CYB5A, BCL2L2, PPP1CC, LPIN1, ST20, MFF, ACSL1, SPATA18, SPG20, MTOR, TOMM34	715	149	18224	2.39486	0.956134	0.159452	8.13243
GOTERM_CC_DIRECT	GO:0042612~MHC class I protein complex	4	0.529801	0.00780595	HLA-H, HLA-A, HLA-F, B2M	715	11	18224	9.2684	0.985011	0.198343	10.77
GOTERM_CC_DIRECT	GO:0005753~mitochondrial proton-transporting ATP synthase complex	5	0.662252	0.00821289	ATP5F1, ATP5L, ATP5I, C14ORF2, ATP5J	715	21	18224	6.0686	0.987969	0.198295	11.3007
GOTERM_CC_DIRECT	GO:0005759~mitochondrial matrix	23	3.04636	0.0100319	ALKBH7, GLRX5, TDRD7, ATP5F1, ECHS1, IDH3B, NDUFA10, TIMM44, PPA2, PDSS2, MMAB, SOD2, ISCA1, MTHFS, ALDH1B1, MTG1, MCEE, MCCC1, CLPP, HADH, SUCLA2, PHYKPL, NDUFS1	715	327	18224	1.79274	0.995503	0.226898	13.6371
GOTERM_CC_DIRECT	GO:0000276~mitochondrial proton-transporting ATP synthase complex, coupling factor F(o)	4	0.529801	0.0101083	ATP5F1, ATP5L, ATP5I, ATP5J	715	12	18224	8.49604	0.995685	0.219271	13.7339
GOTERM_CC_DIRECT	GO:0016592~mediator complex	6	0.794702	0.0111546	MED6, MED4, MED29, MED22, MED13, MED10	715	35	18224	4.36939	0.997552	0.230036	15.0504
GOTERM_CC_DIRECT	GO:0046540~U4/U6 x U5 tri-snRNP complex	5	0.662252	0.0114231	PRPF31, PPIH, LSM6, SNRPB, LSM5	715	23	18224	5.54089	0.997884	0.22631	15.3852
GOTERM_CC_DIRECT	GO:0005881~cytoplasmic microtubule	7	0.927152	0.0142541	CKAP2, SAA1, SRPRB, MAPRE1, TUBGCP2, SERP1, APC	715	51	18224	3.49837	0.999545	0.264943	18.8412
GOTERM_CC_DIRECT	GO:0016605~PML body	10	1.3245	0.0146671	SUMO3, SP100, HIPK1, TDP2, HIPK2, PIAS2, TOPBP1, ATR, MTOR, KLHL20	715	98	18224	2.60083	0.999637	0.262587	19.3342
GOTERM_CC_DIRECT	GO:0033276~transcription factor TFTC complex	4	0.529801	0.0157783	TAF2, TAF5L, TAF7, TRRAP	715	14	18224	7.28232	0.999801	0.27074	20.6469
GOTERM_CC_DIRECT	GO:0031902~late endosome membrane	10	1.3245	0.0175723	ANXA6, CHMP1B, CHMP3, TSG101, MCOLN1, VPS37C, MITD1, FIG4, HLA-DMA, VPS36	715	101	18224	2.52358	0.999925	0.287785	22.7245
GOTERM_CC_DIRECT	GO:0030529~intracellular ribonucleoprotein complex	12	1.5894	0.0180485	ZFP36, PABPN1, LARP7, HNRNPF, SECISBP2, SNRPB, CPSF6, RPS9, PARP4, HNRNPC, YBX1, HNRNPAB	715	136	18224	2.24895	0.999942	0.285829	23.2674
GOTERM_CC_DIRECT	GO:0048471~perinuclear region of cytoplasm	36	4.76821	0.019831	S100A6, GALNT1, SEC24B, SLC2A10, CHERP, CLU, MYO9B, OAS2, TPD52, ANGEL1, ARFGEF1, ANXA6, PSMF1, SERINC5, HIF1AN, PTK2B, SORBS2, HECTD3, SNAP47, TLK2, TRIP10, EHD3, KLHL20, RAB4A, CST3, YWHAB, ACKR3, OPTN, TSC1, VCP, ARF1, SERBP1, FGFR1OP, EIF4A2, IGF2R, AKR1B1	715	621	18224	1.47757	0.999978	0.300839	25.2681
GOTERM_CC_DIRECT	GO:0070847~core mediator complex	3	0.397351	0.0207012	MED6, MED4, MED10	715	6	18224	12.7441	0.999986	0.303499	26.227
GOTERM_CC_DIRECT	GO:0005789~endoplasmic reticulum membrane	47	6.22517	0.0210821	GALNT1, SEC24B, IER3IP1, SC5D, CYB5R2, WFS1, HSD17B12, DNAJB14, ERMARD, CERS4, SEC62, DTNBP1, SEC63, CANT1, POMT2, TMEM147, CEPT1, POMGNT2, ACSL1, RNF103, TMED3, PIGG, DHCR7, INSIG1, ELOVL6, AGPAT1, SLC33A1, UBIAD1, UBE2J1, TMEM132A, CYB5A, SRPRB, CYP4V2, PNPLA3, LPIN1, PNPLA6, AGTRAP, DHRS4, VCP, RNF5, MBOAT7, SEC13, SPCS2, MTOR, ALG11, TBC1D20, SERP1	715	862	18224	1.38972	0.999989	0.300157	26.6432
GOTERM_CC_DIRECT	GO:0019013~viral nucleocapsid	5	0.662252	0.0226511	PRPF31, HNRNPF, SNRPB, HNRNPC, UTP14C	715	28	18224	4.55145	0.999995	0.310742	28.3345
GOTERM_CC_DIRECT	GO:0005765~lysosomal membrane	19	2.51656	0.0230585	CCZ1B, SLC36A1, LAMTOR3, CTSA, TECPR1, CD164, HLA-DMA, TPCN1, ANXA6, DRAM2, DNAJC13, IGF2R, MCOLN1, HLA-DPA1, MTOR, HLA-DPB1, SPG11, EGF, SLC15A3	715	274	18224	1.76742	0.999996	0.307721	28.7676
GOTERM_CC_DIRECT	GO:0071556~integral component of lumenal side of endoplasmic reticulum membrane	5	0.662252	0.0254838	HLA-H, HLA-A, HLA-DPA1, HLA-DPB1, HLA-F	715	29	18224	4.3945	0.999999	0.326539	31.2963
GOTERM_CC_DIRECT	GO:0071339~MLL1 complex	5	0.662252	0.0254838	PRPF31, C17ORF49, TAF7, LAS1L, INO80C	715	29	18224	4.3945	0.999999	0.326539	31.2963
GOTERM_CC_DIRECT	GO:0030173~integral component of Golgi membrane	7	0.927152	0.0255047	IER3IP1, UNC50, CSGALNACT2, SLC35B4, UBIAD1, TBC1D20, TEX261	715	58	18224	3.07615	0.999999	0.31932	31.3177
GOTERM_CC_DIRECT	GO:0030532~small nuclear ribonucleoprotein complex	4	0.529801	0.0270228	LSM6, SNRPB, ARFGEF1, SNRPG	715	17	18224	5.9972	1	0.327566	32.8572
GOTERM_CC_DIRECT	GO:0071013~catalytic step 2 spliceosome	9	1.19205	0.0277834	BCAS2, PLRG1, FRG1, HNRNPF, CDC40, SNRPB, HNRNPC, XAB2, SNRPG	715	92	18224	2.4934	1	0.327961	33.6165
GOTERM_CC_DIRECT	GO:0005840~ribosome	13	1.72185	0.030439	MRPS33, MRPS22, RPS9, RPL6, RPS6KA2, RPL34, RPLP1, MRPL55, RPS13, MRPL18, RPL7A, METTL17, SERP1	715	166	18224	1.99606	1	0.346125	36.2049
GOTERM_CC_DIRECT	GO:0005681~spliceosomal complex	9	1.19205	0.0310749	BCAS2, PPIH, LSM6, CDC40, SNRPB, LSM5, HNRNPC, DHX32, SNRPG	715	94	18224	2.44035	1	0.344929	36.8107
GOTERM_CC_DIRECT	GO:0071141~SMAD protein complex	3	0.397351	0.0366846	SMAD5, SMAD2, SMAD1	715	8	18224	9.55804	1	0.386517	41.9268
GOTERM_CC_DIRECT	GO:0043209~myelin sheath	12	1.5894	0.0369516	SERINC5, TCP1, CNRIP1, VCP, NFASC, ATP5F1, ATP1A1, SUCLA2, NDUFA10, EHD3, NDUFS1, SOD2	715	152	18224	2.01222	1	0.38153	42.1604
GOTERM_CC_DIRECT	GO:0033116~endoplasmic reticulum-Golgi intermediate compartment membrane	7	0.927152	0.0389071	SLC35C2, CD55, MPPE1, GORASP1, TMED3, TBC1D20, WHAMM	715	64	18224	2.78776	1	0.390226	43.8449
GOTERM_CC_DIRECT	GO:0000139~Golgi membrane	33	4.37086	0.0413498	SEC24B, GALNT1, AP1G2, UNC50, ITM2B, ARFGEF1, WHAMM, B2M, CHST10, TMED3, GORASP1, SLC2A1, SLC35B4, HLA-DPB1, GALNT11, HLA-H, SLC33A1, HLA-A, TMEM132A, OPTN, FIG4, AGTRAP, HLA-F, MGAT1, NRAS, CD55, COG6, ARF1, CSGALNACT2, TRAPPC5, SEC13, HLA-DPA1, MTOR	715	591	18224	1.42319	1	0.402156	45.8849
GOTERM_CC_DIRECT	GO:0005747~mitochondrial respiratory chain complex I	6	0.794702	0.0420391	NDUFS6, NDUFA3, NDUFB8, NDUFA10, NDUFA12, NDUFS1	715	49	18224	3.12099	1	0.400442	46.448
GOTERM_CC_DIRECT	GO:0005697~telomerase holoenzyme complex	4	0.529801	0.047114	GAR1, SNRPB, HNRNPC, NHP2	715	21	18224	4.85488	1	0.430123	50.4286
GOTERM_CC_DIRECT	GO:0022625~cytosolic large ribosomal subunit	7	0.927152	0.0499377	ZNF622, SURF6, RPL6, RPL34, RPLP1, RPL7A, NHP2	715	68	18224	2.62378	1	0.442456	52.5223
GOTERM_CC_DIRECT	GO:0005777~peroxisome	9	1.19205	0.0515307	FAR1, MFF, DHRS4, MUL1, GNPAT, PEX5, MVK, AKAP11, PHYH	715	104	18224	2.2057	1	0.446106	53.6668
GOTERM_CC_DIRECT	GO:0042613~MHC class II protein complex	4	0.529801	0.0530164	HLA-A, HLA-DPA1, HLA-DPB1, HLA-DMA	715	22	18224	4.6342	1	0.448919	54.711
GOTERM_CC_DIRECT	GO:0005778~peroxisomal membrane	6	0.794702	0.0596152	FAR1, ACSL1, DHRS4, ARF1, GNPAT, PEX5	715	54	18224	2.83201	1	0.482589	59.0897
GOTERM_CC_DIRECT	GO:0005794~Golgi apparatus	44	5.82781	0.064636	GALNT1, IER3IP1, AP1G2, CLU, EHF, TRRAP, ITM2B, ARFGEF1, B2M, MPPE1, GOLGA8B, SERINC5, CHST10, TMED3, GORASP1, TRIM69, UBXN2B, CD46, PLA2G12A, PAK4, SLC35B4, WDR77, GOLGA8A, KLHL20, ZNF622, TCP1, TAF7, HLA-A, TMEM132A, TOPBP1, ATP1A1, OPTN, ATR, CAPN2, DBI, BICD2, GZF1, SLC35C2, NRAS, DRAM2, LARP7, TMEM43, MAPRE1, PERP	715	863	18224	1.29951	1	0.504536	62.1535
GOTERM_CC_DIRECT	GO:0005687~U4 snRNP	3	0.397351	0.0666988	PRPF31, SNRPB, SNRPG	715	11	18224	6.9513	1	0.509099	63.3493
GOTERM_CC_DIRECT	GO:0005763~mitochondrial small ribosomal subunit	4	0.529801	0.072705	MRPS33, MRPS22, MRPS5, MRPS31	715	25	18224	4.0781	1	0.533912	66.6335
GOTERM_CC_DIRECT	GO:0071011~precatalytic spliceosome	4	0.529801	0.072705	BCAS2, PRPF31, PLRG1, SNRPG	715	25	18224	4.0781	1	0.533912	66.6335
GOTERM_CC_DIRECT	GO:1990730~VCP-NSFL1C complex	2	0.264901	0.0768253	VCP, NSFL1C	715	2	18224	25.4881	1	0.547717	68.7256
GOTERM_CC_DIRECT	GO:0034709~methylosome	3	0.397351	0.078017	WDR77, SNRPB, SNRPG	715	12	18224	6.37203	1	0.546884	69.3076
GOTERM_CC_DIRECT	GO:0030670~phagocytic vesicle membrane	6	0.794702	0.0807803	HLA-H, ATG5, HLA-A, PIK3R4, HLA-F, B2M	715	59	18224	2.59201	1	0.55345	70.6184
GOTERM_CC_DIRECT	GO:0031901~early endosome membrane	9	1.19205	0.0855084	HLA-H, DNAJC13, SYNDIG1, ZFYVE16, HLA-A, FIG4, APPL1, HLA-F, B2M	715	116	18224	1.97753	1	0.568528	72.7411
GOTERM_CC_DIRECT	GO:0016580~Sin3 complex	3	0.397351	0.0898813	MORF4L1, SIN3B, CSNK2A1	715	13	18224	5.88187	1	0.581197	74.5763

## Sheet: B-to-A_MF
Category	Term	Count	%	PValue	Genes	List Total	Pop Hits	Pop Total	Fold Enrichment	Bonferroni	Benjamini	FDR
GOTERM_MF_DIRECT	GO:0005515~protein binding	435	57.6159	1.01343e-11	PPP1R26, CROCC, SURF6, LSM6, MED23, MED22, WTAP, FAH, B2M, TMEM147, TAF5L, MED29, CLK4, WDR77, RPLP1, LSM5, ZNF397, TLK2, MAP2K7, DHX32, ACAA2, TFPT, PCBD1, AIG1, TTC7B, MED10, ADAMTS7, GGACT, TRAPPC8, TRAPPC5, RPS13, MAPK9, SURF1, HSD17B12, CHCHD3, ZNF511, BCL2L2, CHCHD4, NAGK, ARFGEF1, MTIF3, XAB2, CHCHD6, TMEM128, C1ORF50, GORASP1, IQSEC1, ZNF622, RPSA, ZC3H13, RPS9, ATR, USF1, USF2, ARF1, HEB…	672	8785	16881	1.24387	8.85741e-09	8.85741e-09	1.5737e-08
GOTERM_MF_DIRECT	GO:0044822~poly(A) RNA binding	78	10.3311	2.16982e-06	CHERP, GAR1, SURF6, LSM6, LYAR, U2SURP, PNISR, ZNF638, C1ORF35, MRPS31, YBX1, DDX24, DHX32, SAMD4B, PABPN1, ZFP36, PRPF31, ACAA2, RBM42, SECISBP2, HLA-A, MRPS5, EIF1B, LAS1L, PPP1CC, FAM120A, PARP12, LARP7, EIF4A2, NCOA5, SERBP1, SNRPB, RPS12, KHSRP, CPSF6, RPS13, MAPRE1, NHP2, SNRPG, BCLAF1, RBM33, KMT2C, BCCIP, C1ORF131, ERI3, DUSP11, SEC63, TCERG1, C2ORF15, SORBS2, RPL6, FRG1, HNRNPF, CDC40, R…	672	1129	16881	1.73552	0.00189462	0.000947761	0.00336932
GOTERM_MF_DIRECT	GO:0003723~RNA binding	38	5.03311	0.00118766	GTF3A, CHERP, AGFG1, SURF6, LSM6, U2SURP, UNC50, SYNJ1, ZNF638, DUSP11, YBX1, SFSWAP, DDX11, RAE1, RPL6, RNASET2, RPL34, HNRNPF, LSM5, HNRNPC, RPL7A, HNRNPAB, SAMD4B, PABPN1, ELAVL1, DIS3L, PAPOLA, LARP7, SNRPB, KHSRP, CPSF6, NOP56, DDX54, PABPC1L, THOC3, NHP2, SNRPG, ADAR	672	547	16881	1.74512	0.64606	0.292636	1.82841
GOTERM_MF_DIRECT	GO:0016874~ligase activity	22	2.91391	0.00268301	RNF220, UBE4A, UBE3B, RNF19A, TRIM41, CBX4, MUL1, RNF187, TRIM4, TRIM38, RNF130, ACSL1, UHRF2, TRIM33, RNF103, RNF5, TRIM69, HECTD3, PIAS2, SIAH2, SUCLA2, TRIM39	672	270	16881	2.04686	0.90445	0.444022	4.08606
GOTERM_MF_DIRECT	GO:0022857~transmembrane transporter activity	8	1.0596	0.00305201	SLC22A17, SLC2A10, SLC22A15, SLC2A1, ATP5F1, ATP5L, ATP5I, ATP5J	672	49	16881	4.10131	0.930854	0.413924	4.63564
GOTERM_MF_DIRECT	GO:0070034~telomerase RNA binding	5	0.662252	0.00307225	GAR1, SNRPB, HNRNPC, NHP2, PINX1	672	16	16881	7.85017	0.93207	0.361232	4.6657
GOTERM_MF_DIRECT	GO:0004129~cytochrome-c oxidase activity	6	0.794702	0.00610204	COX7A1, COX6B1, CYB5A, COX7A2L, SURF1, COX5B	672	30	16881	5.02411	0.99525	0.534301	9.06681
GOTERM_MF_DIRECT	GO:0003735~structural constituent of ribosome	18	2.38411	0.00764318	RPSA, MRPS33, MRPS22, MRPS5, RPS9, MRPS31, RPL6, SLC25A23, RPL34, RPLP1, MRPL36, RPS12, SLC25A38, SLC25A28, MRPL55, RPS13, MRPL18, RPL7A	672	222	16881	2.0368	0.998776	0.567522	11.2318
GOTERM_MF_DIRECT	GO:0001730~2'-5'-oligoadenylate synthetase activity	3	0.397351	0.00897341	OAS3, OAS1, OAS2	672	4	16881	18.8404	0.999621	0.583285	13.0617
GOTERM_MF_DIRECT	GO:0030618~transforming growth factor beta receptor, pathway-specific cytoplasmic mediator activity	3	0.397351	0.0145632	SMAD5, SMAD2, SMAD1	672	5	16881	15.0723	0.999997	0.722568	20.3721
GOTERM_MF_DIRECT	GO:0047485~protein N-terminus binding	10	1.3245	0.014996	MORF4L1, CSNK2A2, NIPBL, ERCC6, CSNK2A1, TSC1, TDRD7, PEX5, PARP1, PPP1CC	672	97	16881	2.58975	0.999998	0.698963	20.9134
GOTERM_MF_DIRECT	GO:0042802~identical protein binding	43	5.69536	0.0157879	SEPHS1, UBE2G2, ESD, LZTFL1, TPCN1, B2M, CASP6, GOT1, C1ORF50, SLC2A1, HNRNPC, BRI3, TRIP10, TNIP1, SP100, PCBD1, CST3, SDSL, TRIM41, MUL1, AHI1, TOPBP1, OPTN, SMAD1, APPL1, STK4, DAPK1, SOD2, TRIM55, VCP, IGF2R, CLPP, CLDN1, SEC13, MAPRE2, MVK, MAPRE1, ATG16L1, PARP1, PHYKPL, TRIM39, PRPS2, LCP1	672	749	16881	1.44217	0.999999	0.686219	21.895
GOTERM_MF_DIRECT	GO:0019904~protein domain specific binding	16	2.11921	0.0192638	ARHGEF4, SP100, DICER1, NFASC, YWHAB, ATP1A1, MITD1, PPP1CC, ANGEL1, MRPS31, PTPN11, CHMP1B, VCP, IGBP1, MTOR, CALM1	672	208	16881	1.93235	1	0.729574	26.0702
GOTERM_MF_DIRECT	GO:0016779~nucleotidyltransferase activity	5	0.662252	0.0209834	NUDT5, OAS3, OAS1, OAS2, EIF2B3	672	27	16881	4.65195	1	0.733905	28.0577
GOTERM_MF_DIRECT	GO:0004842~ubiquitin-protein transferase activity	22	2.91391	0.0228027	RNF220, UBE3B, RNF19A, ANAPC4, FBXO2, UBE2G2, MUL1, RNF187, KCTD10, RNF130, UHRF2, TRIM33, RNF103, RNF5, TRIM69, RMND5B, FBXO6, FBXO25, HECTD3, SIAH2, KLHL20, FBXO11	672	329	16881	1.67979	1	0.739204	30.1059
GOTERM_MF_DIRECT	GO:0019899~enzyme binding	22	2.91391	0.0257647	ZFP36, UNG, CBX4, YWHAB, PEX5, CYB5A, TBP, CD40, DIS3L, USF1, PDCD2, RFC4, PPP1R3B, ANK2, BTG1, IGF2R, KDM4C, HDHD2, MDM4, PARP4, PARP1, MAP2K7	672	333	16881	1.65961	1	0.759695	33.3242
GOTERM_MF_DIRECT	GO:0031406~carboxylic acid binding	3	0.397351	0.0290064	GOT1, HIF1AN, AKR1C1	672	7	16881	10.7659	1	0.779823	36.6873
GOTERM_MF_DIRECT	GO:0015078~hydrogen ion transmembrane transporter activity	5	0.662252	0.0368291	SLC36A1, ATP5F1, ATP5L, ATP5I, ATP5J	672	32	16881	3.92508	1	0.838301	44.1608
GOTERM_MF_DIRECT	GO:0043531~ADP binding	5	0.662252	0.0406376	VCP, PRKAG2, MYO9B, ATP1A1, PRPS2	672	33	16881	3.80614	1	0.851679	47.4927
GOTERM_MF_DIRECT	GO:0008137~NADH dehydrogenase (ubiquinone) activity	6	0.794702	0.0410281	NDUFS6, NDUFA3, NDUFB8, NDUFA10, NDUFA12, NDUFS1	672	48	16881	3.14007	1	0.839706	47.8235
GOTERM_MF_DIRECT	GO:0005085~guanyl-nucleotide exchange factor activity	10	1.3245	0.045589	CCZ1B, ARHGEF4, PLEKHG2, LAMTOR3, DOCK1, ARHGEF18, ARHGEF12, EIF2B3, ARFGEF1, RALGDS	672	118	16881	2.12886	1	0.856581	51.5466
GOTERM_MF_DIRECT	GO:0051213~dioxygenase activity	4	0.529801	0.0488202	ALKBH7, PHF2, KDM4C, KDM3A	672	21	16881	4.78486	1	0.863091	54.0323
GOTERM_MF_DIRECT	GO:0004386~helicase activity	8	1.0596	0.0521514	ERCC6, DDX11, NAV2, EIF4A2, DICER1, DDX24, DHX40, DHX32	672	85	16881	2.36429	1	0.869359	56.4695
GOTERM_MF_DIRECT	GO:0001104~RNA polymerase II transcription cofactor activity	5	0.662252	0.0533514	MED6, MED4, MED22, MED13, MED10	672	36	16881	3.48896	1	0.864207	57.3174
GOTERM_MF_DIRECT	GO:0045296~cadherin binding	4	0.529801	0.0613526	CTNNAL1, CD46, FXYD5, APC	672	23	16881	4.36879	1	0.890683	62.5883
GOTERM_MF_DIRECT	GO:0008234~cysteine-type peptidase activity	5	0.662252	0.0628907	CTSL, CASP6, CASP7, CAPN2, CTSH	672	38	16881	3.30533	1	0.887353	63.529
GOTERM_MF_DIRECT	GO:0032454~histone demethylase activity (H3-K9 specific)	3	0.397351	0.0684163	PHF2, KDM4C, KDM3A	672	11	16881	6.85106	1	0.899144	66.729
GOTERM_MF_DIRECT	GO:0035925~mRNA 3'-UTR AU-rich region binding	3	0.397351	0.0684163	ZFP36, KHSRP, ELAVL1	672	11	16881	6.85106	1	0.899144	66.729
GOTERM_MF_DIRECT	GO:0016791~phosphatase activity	5	0.662252	0.0732627	SSH1, HDHD2, ATP1A1, DUSP11, PPP1CC	672	40	16881	3.14007	1	0.90698	69.3176
GOTERM_MF_DIRECT	GO:0051537~2 iron, 2 sulfur cluster binding	4	0.529801	0.0752192	ISCA1, GLRX5, NDUFS1, ATP5J	672	25	16881	4.01929	1	0.905272	70.3081
GOTERM_MF_DIRECT	GO:0000979~RNA polymerase II core promoter sequence-specific DNA binding	6	0.794702	0.0754256	RREB1, SMAD5, H2AFZ, TBP, SMAD1, ZNF335	672	57	16881	2.64427	1	0.898194	70.4109
GOTERM_MF_DIRECT	GO:0070410~co-SMAD binding	3	0.397351	0.0799969	TRIM33, SMAD2, SMAD1	672	12	16881	6.28013	1	0.9047	72.6028
GOTERM_MF_DIRECT	GO:0016740~transferase activity	8	1.0596	0.0875985	GALNT1, OAS3, GSTZ1, OAS1, OAS2, GALNT11, CDK5RAP1, PDSS2	672	96	16881	2.09338	1	0.918233	75.9147
GOTERM_MF_DIRECT	GO:0001103~RNA polymerase II repressing transcription factor binding	4	0.529801	0.0903304	BBS4, TCERG1, TBP, DMAP1	672	27	16881	3.72156	1	0.918522	77.0105
GOTERM_MF_DIRECT	GO:0097153~cysteine-type endopeptidase activity involved in apoptotic process	3	0.397351	0.0921294	CASP6, CASP3, CASP7	672	13	16881	5.79705	1	0.916638	77.7064
GOTERM_MF_DIRECT	GO:0042605~peptide antigen binding	4	0.529801	0.0983222	HLA-A, HLA-DPA1, HLA-DPB1, HLA-F	672	28	16881	3.58865	1	0.924566	79.9544
GOTERM_MF_DIRECT	GO:0003677~DNA binding	78	10.3311	0.0985292	GTF3A, ERCC6L2, SURF6, TSG101, ZNF827, TBP, YBX1, ZNF343, PDCD2, ZNF777, DDX11, MIER1, ZNF146, HOMEZ, ZNF395, ZNF721, ZFP36, SP100, TFPT, POLR1D, GABPA, MTA3, TOPBP1, LHFP, MBD1, UHRF2, RFC4, HIPK1, TRIM33, ZNF197, ZNF888, HIPK2, KHSRP, PIAS2, TFAP2C, LCOR, ZFAND6, BCLAF1, APEX2, ZNF468, SSH1, AGFG1, KMT2C, ZNF511, CERS4, EHF, ZNF655, PAXBP1, SP110, NR2C2, CXXC1, NR1H2, ERCC6, RPL6, ETV5, C17ORF4…	672	1674	16881	1.17049	1	0.919402	80.0257

## Sheet: A-to-B_BP
Category	Term	Count	%	PValue	Genes	List Total	Pop Hits	Pop Total	Fold Enrichment	Bonferroni	Benjamini	FDR
GOTERM_BP_DIRECT	GO:0043113~receptor clustering	3	3.84615	0.00292884	ITGA4, DLG3, GRIK2	69	20	16792	36.5043	0.818073	1	1
GOTERM_BP_DIRECT	GO:0050919~negative chemotaxis	3	3.84615	0.008338	SEMA3D, SEMA3A, SLIT2	69	34	16792	21.4731	0.992286	1	1
GOTERM_BP_DIRECT	GO:0021987~cerebral cortex development	3	3.84615	0.0216201	MKKS, FAT4, PLCB1	69	56	16792	13.0373	0.999997	1	1
GOTERM_BP_DIRECT	GO:0009612~response to mechanical stimulus	3	3.84615	0.0238354	KCNK2, ETS1, DCN	69	59	16792	12.3744	0.999999	1	1
GOTERM_BP_DIRECT	GO:0097190~apoptotic signaling pathway	3	3.84615	0.0335639	TM2D1, PAWR, PRKCA	69	71	16792	10.2829	1	1	1
GOTERM_BP_DIRECT	GO:0097120~receptor localization to synapse	2	2.5641	0.0358695	CEP112, DLG3	69	9	16792	54.0805	1	1	1
GOTERM_BP_DIRECT	GO:0006457~protein folding	4	5.12821	0.0365462	ERP44, MKKS, TMX4, TMX3	69	180	16792	5.40805	1	1	1
GOTERM_BP_DIRECT	GO:0034976~response to endoplasmic reticulum stress	3	3.84615	0.0370975	ERP44, TMX4, TMX3	69	75	16792	9.73449	1	1	1
GOTERM_BP_DIRECT	GO:0045454~cell redox homeostasis	3	3.84615	0.0389157	ERP44, TMX4, TMX3	69	77	16792	9.48165	1	1	1
GOTERM_BP_DIRECT	GO:0045944~positive regulation of transcription from RNA polymerase II promoter	9	11.5385	0.0439222	ZEB2, PPP1R12A, MAML2, LUM, SHOX2, NR2F1, ETS1, DCN, FLI1	69	981	16792	2.23268	1	1	1
GOTERM_BP_DIRECT	GO:0030198~extracellular matrix organization	4	5.12821	0.0451636	ITGA4, LUM, COL11A1, DCN	69	196	16792	4.96658	1	1	1
GOTERM_BP_DIRECT	GO:0043116~negative regulation of vascular permeability	2	2.5641	0.047542	PDE3A, SLIT2	69	12	16792	40.5604	1	1	1
GOTERM_BP_DIRECT	GO:0048846~axon extension involved in axon guidance	2	2.5641	0.047542	SEMA3A, SLIT2	69	12	16792	40.5604	1	1	1
GOTERM_BP_DIRECT	GO:0007601~visual perception	4	5.12821	0.0480465	MKKS, LUM, COL11A1, HMCN1	69	201	16792	4.84303	1	1	1
GOTERM_BP_DIRECT	GO:0050806~positive regulation of synaptic transmission	2	2.5641	0.0514017	SYT1, GRIK2	69	13	16792	37.4404	1	1	1
GOTERM_BP_DIRECT	GO:0030837~negative regulation of actin filament polymerization	2	2.5641	0.0514017	MKKS, SLIT2	69	13	16792	37.4404	1	1	1
GOTERM_BP_DIRECT	GO:0050910~detection of mechanical stimulus involved in sensory perception of sound	2	2.5641	0.0552461	MKKS, COL11A1	69	14	16792	34.766	1	1	1
GOTERM_BP_DIRECT	GO:0002063~chondrocyte development	2	2.5641	0.0590751	COL11A1, SHOX2	69	15	16792	32.4483	1	1	1
GOTERM_BP_DIRECT	GO:0007215~glutamate receptor signaling pathway	2	2.5641	0.0590751	GRIK2, PLCB1	69	15	16792	32.4483	1	1	1
GOTERM_BP_DIRECT	GO:0010596~negative regulation of endothelial cell migration	2	2.5641	0.0704707	SLIT2, DCN	69	18	16792	27.0403	1	1	1
GOTERM_BP_DIRECT	GO:0007031~peroxisome organization	2	2.5641	0.0704707	TMEM135, PEX2	69	18	16792	27.0403	1	1	1
GOTERM_BP_DIRECT	GO:0050772~positive regulation of axonogenesis	2	2.5641	0.0817302	SHOX2, SLIT2	69	21	16792	23.1774	1	1	1
GOTERM_BP_DIRECT	GO:0048278~vesicle docking	2	2.5641	0.0891618	STX17, SYT1	69	23	16792	21.1619	1	1	1
GOTERM_BP_DIRECT	GO:0051966~regulation of synaptic transmission, glutamatergic	2	2.5641	0.0891618	SYT1, DKK1	69	23	16792	21.1619	1	1	1

## Sheet: A-to-B CC
Category	Term	Count	%	PValue	Genes	List Total	Pop Hits	Pop Total	Fold Enrichment	Bonferroni	Benjamini	FDR
GOTERM_CC_DIRECT	GO:0009986~cell surface	7	8.97436	0.0166111	ERP44, TMX3, ITGA4, FZD4, SLIT2, TFPI, KCNK2	70	542	18224	3.36236	0.914764	1	1
GOTERM_CC_DIRECT	GO:0044233~ER-mitochondrion membrane contact site	2	2.5641	0.029897	STX17, RAB38	70	8	18224	65.0857	0.98846	1	1
GOTERM_CC_DIRECT	GO:0005615~extracellular space	10	12.8205	0.0667672	DLG3, LUM, SEMA3D, SEMA3A, LRIG3, SLIT2, TFPI, DKK1, DCN, CTSC	70	1347	18224	1.93276	0.999961	1	1
GOTERM_CC_DIRECT	GO:0005813~centrosome	5	6.41026	0.0779373	MKKS, CEP112, PPP1R12A, KIFAP3, PRKACB	70	426	18224	3.05567	0.999993	1	1
GOTERM_CC_DIRECT	GO:0005886~plasma membrane	22	28.2051	0.0821459	CEP112, TRPC6, SYT1, ITGA4, FZD4, PAWR, PRKCA, GRIK2, GAB2, TFPI, DKK1, RHOBTB1, RGS4, TMX3, DLG3, RAB38, LRIG3, SLIT2, FAT4, KCNK2, PRKACB, CD99	70	4121	18224	1.38984	0.999997	1	1
GOTERM_CC_DIRECT	GO:0005783~endoplasmic reticulum	7	8.97436	0.0929484	TMX4, RAB38, PRKCA, SEC61B, KIFAP3, TFPI, KCNK2	70	828	18224	2.20097	0.999999	1	1
GOTERM_CC_DIRECT	GO:0030134~ER to Golgi transport vesicle	2	2.5641	0.0939822	STX17, CTSC	70	26	18224	20.0264	0.999999	1	1

## Sheet: A-to-B MF
Category	Term	Count	%	PValue	Genes	List Total	Pop Hits	Pop Total	Fold Enrichment	Bonferroni	Benjamini	FDR
GOTERM_MF_DIRECT	GO:0003756~protein disulfide isomerase activity	3	3.84615	0.00330653	ERP44, TMX4, TMX3	67	22	16881	34.3575	0.426741	0.555496	0.555496
GOTERM_MF_DIRECT	GO:0004871~signal transducer activity	5	6.41026	0.00832544	PPP1R12A, PLCB4, PLCB1, DKK1, GULP1	67	204	16881	6.17537	0.754517	0.699337	0.699337
GOTERM_MF_DIRECT	GO:0005515~protein binding	44	56.4103	0.0213867	INVS, STX17, FAF1, CSTF2T, TMEM140, ETS1, PDZD11, RSRC1, SEC61B, SLIT2, KIFAP3, PRKACB, CTSC, MKKS, CDKN2C, PPP1R12A, TRPC6, SYT1, ITGA4, FZD4, LUM, STAC, UBE2E3, NR2F1, ALG2, PAWR, DSTN, PEX2, PRKCA, GAB2, DKK1, FLI1, DCN, NAALADL2, C7ORF49, ERP44, ZEB2, PLCB4, TMX3, DLG3, MAB21L1, RAB38, FAT4, PLCB1	67	8785	16881	1.26193	0.973535	0.90901	0.90901
GOTERM_MF_DIRECT	GO:0031625~ubiquitin protein ligase binding	5	6.41026	0.0258983	DLG3, FZD4, FAF1, GRIK2, PRKACB	67	287	16881	4.38946	0.987824	0.90901	0.90901
GOTERM_MF_DIRECT	GO:0019208~phosphatase regulator activity	2	2.5641	0.0270539	ZEB2, PPP1R12A	67	7	16881	71.9872	0.990025	0.90901	0.90901
GOTERM_MF_DIRECT	GO:0005516~calmodulin binding	4	5.12821	0.0378015	INVS, RGS4, SYT1, PLCB1	67	189	16881	5.33239	0.998457	1	1
GOTERM_MF_DIRECT	GO:0030165~PDZ domain binding	3	3.84615	0.0445974	DLG3, FZD4, GRIK2	67	86	16881	8.78914	0.999531	1	1
GOTERM_MF_DIRECT	GO:0038191~neuropilin binding	2	2.5641	0.0570907	SEMA3D, SEMA3A	67	15	16881	33.594	0.999949	1	1
GOTERM_MF_DIRECT	GO:0050750~low-density lipoprotein particle receptor binding	2	2.5641	0.0607805	SYT1, DKK1	67	16	16881	31.4944	0.999973	1	1
GOTERM_MF_DIRECT	GO:0005509~calcium ion binding	7	8.97436	0.0608552	PLCB4, SYT1, GPD2, FAT4, HMCN1, SLIT2, PLCB1	67	717	16881	2.45981	0.999974	1	1
GOTERM_MF_DIRECT	GO:0030215~semaphorin receptor binding	2	2.5641	0.0862139	SEMA3D, SEMA3A	67	23	16881	21.9091	1	1	1
GOTERM_MF_DIRECT	GO:0050840~extracellular matrix binding	2	2.5641	0.0969051	COL11A1, DCN	67	26	16881	19.3812	1	1	1
