# Supplementary material for: The loss of heterochromatin is associated with multiscale three-dimensional genome reorganization and aberrant transcription during cellular senescence
Source: HighWire-hosted journal article supplement (doi:10.1101/gr.275235.121), 2021-06-17
Supplement: Supplemental_Table_S5.xlsx [file Supplemental_Table_S5.xlsx]

## Sheet: TAD_types_DS_vs_G
Table S5: The numbers of significantly differential interactions for each TAD.
chrom	anchor-bin(/20 kb)	anchor-bin(/20kb)	Decreased interaction number	Increased interaction number	TAD types
1	65	78	5	0	unchanged
1	80	92	3	0	unchanged
1	94	103	2	2	unchanged
1	105	115	1	0	unchanged
1	117	125	0	0	unchanged
1	127	168	7	35	increased
1	170	190	5	2	unchanged
1	192	233	1	50	increased
1	235	303	5	76	increased
1	305	312	1	1	unchanged
1	314	325	5	0	unchanged
1	327	335	4	0	unchanged
1	337	400	17	11	unchanged
1	402	420	8	0	decreased
1	422	446	23	0	decreased
1	448	458	3	0	unchanged
1	460	482	15	1	decreased
1	484	497	7	0	decreased
1	499	526	25	0	decreased
1	528	553	3	1	unchanged
1	555	592	5	7	unchanged
1	594	606	2	0	unchanged
1	608	614	1	0	unchanged
1	616	637	13	2	decreased
1	673	691	0	1	unchanged
1	693	697	0	5	unchanged
1	699	716	0	7	unchanged
1	718	773	5	57	increased
1	775	782	0	2	unchanged
1	784	792	1	0	unchanged
1	794	803	5	0	unchanged
1	805	818	9	0	decreased
1	820	841	13	0	decreased
1	843	861	9	1	decreased
1	863	887	8	2	decreased
1	889	897	1	0	unchanged
1	899	945	3	39	increased
1	947	960	0	7	unchanged
1	962	971	6	0	decreased
1	973	976	1	0	unchanged
1	978	1000	7	0	decreased
1	1002	1010	4	0	unchanged
1	1012	1027	0	4	unchanged
1	1029	1042	2	4	unchanged
1	1044	1048	1	0	unchanged
1	1050	1077	19	0	decreased
1	1079	1083	1	0	unchanged
1	1085	1099	6	0	decreased
1	1101	1117	17	0	decreased
1	1119	1137	7	2	decreased
1	1139	1149	3	0	unchanged
1	1151	1165	6	1	decreased
1	1167	1181	10	0	decreased
1	1183	1193	4	0	unchanged
1	1195	1203	2	0	unchanged
1	1205	1218	8	0	decreased
1	1220	1237	14	0	decreased
1	1239	1248	6	0	decreased
1	1250	1258	3	0	unchanged
1	1260	1277	5	0	unchanged
1	1279	1292	8	0	decreased
1	1294	1309	11	0	decreased
1	1311	1317	1	0	unchanged
1	1319	1339	12	0	decreased
1	1341	1362	16	0	decreased
1	1364	1385	14	0	decreased
1	1387	1406	15	0	decreased
1	1408	1418	7	2	decreased
1	1420	1428	4	0	unchanged
1	1430	1448	8	0	decreased
1	1450	1459	3	0	unchanged
1	1461	1477	1	0	unchanged
1	1479	1560	15	36	increased
1	1562	1570	1	0	unchanged
1	1572	1591	8	0	decreased
1	1593	1601	1	0	unchanged
1	1603	1611	4	0	unchanged
1	1613	1632	17	0	decreased
1	1634	1643	4	0	unchanged
1	1645	1667	9	0	decreased
1	1669	1678	3	0	unchanged
1	1680	1697	7	0	decreased
1	1699	1762	9	33	increased
1	1764	1781	3	1	unchanged
1	1783	1792	0	0	unchanged
1	1794	1816	2	1	unchanged
1	1818	1827	5	0	unchanged
1	1829	1845	9	0	decreased
1	1847	1896	0	48	increased
1	1898	1914	2	3	unchanged
1	1916	1923	2	0	unchanged
1	1925	1966	2	31	increased
1	1968	1976	3	0	unchanged
1	1978	2001	8	1	decreased
1	2003	2012	3	0	unchanged
1	2014	2025	6	0	decreased
1	2027	2047	11	0	decreased
1	2049	2074	10	2	decreased
1	2076	2084	1	0	unchanged
1	2086	2096	0	0	unchanged
1	2098	2131	5	5	unchanged
1	2133	2162	2	4	unchanged
1	2164	2181	3	2	unchanged
1	2183	2193	2	1	unchanged
1	2195	2208	6	0	decreased
1	2210	2225	1	0	unchanged
1	2227	2258	8	1	decreased
1	2260	2272	7	0	decreased
1	2274	2290	1	1	unchanged
1	2292	2301	0	0	unchanged
1	2303	2324	7	0	decreased
1	2326	2341	6	0	decreased
1	2343	2351	1	0	unchanged
1	2353	2358	2	0	unchanged
1	2360	2380	0	16	increased
1	2382	2412	4	8	unchanged
1	2414	2426	0	7	unchanged
1	2428	2450	0	2	unchanged
1	2452	2540	3	85	increased
1	2542	2560	3	0	unchanged
1	2562	2588	7	1	decreased
1	2590	2600	7	0	decreased
1	2602	2614	6	0	decreased
1	2616	2625	3	0	unchanged
1	2627	2641	7	1	decreased
1	2643	2659	8	0	decreased
1	2661	2685	14	0	decreased
1	2687	2694	2	0	unchanged
1	2696	2715	10	0	decreased
1	2717	2722	5	0	unchanged
1	2724	2776	25	2	decreased
1	2778	2863	44	7	decreased
1	2865	2936	14	10	unchanged
1	2938	2957	3	1	unchanged
1	2959	3013	28	3	decreased
1	3015	3065	4	25	increased
1	3067	3073	0	0	unchanged
1	3075	3129	27	7	decreased
1	3131	3145	1	0	unchanged
1	3147	3163	7	0	decreased
1	3165	3200	1	5	unchanged
1	3202	3236	10	0	decreased
1	3238	3266	3	2	unchanged
1	3268	3274	1	0	unchanged
1	3276	3308	7	0	decreased
1	3310	3320	2	0	unchanged
1	3322	3336	0	0	unchanged
1	3338	3360	10	0	decreased
1	3362	3383	7	3	decreased
1	3385	3398	1	1	unchanged
1	3400	3413	2	0	unchanged
1	3415	3428	0	1	unchanged
1	3430	3444	1	0	unchanged
1	3446	3534	7	31	increased
1	3536	3548	0	0	unchanged
1	3550	3577	2	3	unchanged
1	3579	3625	5	14	increased
1	3627	3760	13	51	increased
1	3762	3785	0	9	increased
1	3787	3815	1	15	increased
1	3817	3880	5	30	increased
1	3882	3908	14	0	decreased
1	3910	3920	8	0	decreased
1	3922	3928	2	0	unchanged
1	3930	3956	11	3	decreased
1	3958	3984	2	0	unchanged
1	3986	4033	1	8	increased
1	4035	4100	7	22	increased
1	4102	4113	1	4	unchanged
1	4115	4217	23	11	decreased
1	4219	4245	6	2	decreased
1	4247	4271	8	0	decreased
1	4273	4277	0	0	unchanged
1	4279	4286	2	0	unchanged
1	4288	4302	6	1	decreased
1	4304	4307	2	0	unchanged
1	4309	4318	2	0	unchanged
1	4320	4341	3	0	unchanged
1	4343	4359	0	2	unchanged
1	4361	4377	2	0	unchanged
1	4379	4454	15	32	increased
1	4456	4468	5	0	unchanged
1	4470	4497	2	2	unchanged
1	4499	4512	0	1	unchanged
1	4514	4525	4	1	unchanged
1	4527	4588	2	41	increased
1	4590	4594	0	1	unchanged
1	4596	4621	6	3	unchanged
1	4623	4639	1	2	unchanged
1	4641	4663	2	1	unchanged
1	4665	4672	0	0	unchanged
1	4674	4718	36	1	decreased
1	4720	4746	20	0	decreased
1	4748	4765	13	0	decreased
1	4767	4777	2	0	unchanged
1	4779	4828	0	26	increased
1	4830	4861	0	4	unchanged
1	4863	4869	1	0	unchanged
1	4871	4928	29	4	decreased
1	4930	4949	0	2	unchanged
1	4951	4980	2	4	unchanged
1	4982	5011	7	1	decreased
1	5013	5046	12	0	decreased
1	5048	5068	3	0	unchanged
1	5070	5093	5	1	unchanged
1	5095	5149	3	29	increased
1	5151	5175	4	3	unchanged
1	5207	5252	0	17	increased
1	5254	5259	0	1	unchanged
1	5261	5321	5	19	increased
1	5323	5391	4	19	increased
1	5393	5414	0	2	unchanged
1	5416	5437	1	6	unchanged
1	5439	5462	1	1	unchanged
1	5464	5473	2	0	unchanged
1	5475	5502	16	0	decreased
1	5504	5516	8	0	decreased
1	5518	5534	6	1	decreased
1	5536	5552	3	1	unchanged
1	5554	5598	4	17	increased
1	5600	5616	5	1	unchanged
1	5618	5645	0	23	increased
1	5647	5661	2	0	unchanged
1	5663	5681	7	0	decreased
1	5683	5716	5	4	unchanged
1	5718	5724	0	0	unchanged
1	5726	5746	2	4	unchanged
1	5748	5764	3	0	unchanged
1	5766	5808	10	9	unchanged
1	5810	5815	0	2	unchanged
1	5817	5832	2	0	unchanged
1	5834	5856	0	5	unchanged
1	5858	5880	0	8	increased
1	5882	5893	0	1	unchanged
1	5895	5924	12	2	decreased
1	5926	6006	13	37	increased
1	6008	6013	0	0	unchanged
1	7257	7268	3	0	unchanged
1	7270	7279	4	0	unchanged
1	7281	7300	0	0	unchanged
1	7302	7339	2	4	unchanged
1	7341	7345	0	0	unchanged
1	7347	7356	0	1	unchanged
1	7358	7370	0	4	unchanged
1	7372	7375	0	0	unchanged
1	7377	7394	0	0	unchanged
1	7443	7488	1	9	increased
1	7490	7510	11	0	decreased
1	7512	7551	19	1	decreased
1	7553	7563	4	0	unchanged
1	7565	7568	0	0	unchanged
1	7570	7600	4	2	unchanged
1	7602	7621	1	8	increased
1	7623	7665	0	39	increased
1	7667	7673	0	2	unchanged
1	7675	7698	6	1	decreased
1	7700	7711	1	0	unchanged
1	7713	7757	12	8	unchanged
1	7759	7785	17	0	decreased
1	7787	7802	10	0	decreased
1	7804	7816	8	0	decreased
1	7818	7832	11	0	decreased
1	7834	7846	0	0	unchanged
1	7848	7852	0	0	unchanged
1	7854	7874	0	12	increased
1	7876	7894	0	8	increased
1	7896	7905	0	0	unchanged
1	7907	7954	2	19	increased
1	7956	8001	2	16	increased
1	8003	8018	4	1	unchanged
1	8020	8030	0	8	increased
1	8032	8056	1	11	increased
1	8058	8069	4	0	unchanged
1	8071	8085	0	1	unchanged
1	8087	8100	10	0	decreased
1	8102	8128	4	1	unchanged
1	8130	8139	3	0	unchanged
1	8141	8166	4	0	unchanged
1	8168	8255	14	36	increased
1	8257	8278	1	6	unchanged
1	8280	8294	1	0	unchanged
1	8296	8324	0	21	increased
1	8326	8341	0	6	unchanged
1	8343	8352	0	2	unchanged
1	8354	8359	0	3	unchanged
1	8361	8382	0	1	unchanged
1	8384	8403	2	1	unchanged
1	8405	8414	1	0	unchanged
1	8416	8476	13	14	unchanged
1	8478	8490	0	1	unchanged
1	8492	8547	11	4	decreased
1	8549	8574	5	1	unchanged
1	8576	8597	2	0	unchanged
1	8599	8621	8	0	decreased
1	8623	8634	0	0	unchanged
1	8636	8670	9	1	decreased
1	8672	8697	3	0	unchanged
1	8699	8709	1	2	unchanged
1	8711	8737	2	2	unchanged
1	8739	8749	1	0	unchanged
1	8751	8764	0	2	unchanged
1	8766	8817	12	27	increased
1	8819	8841	0	14	increased
1	8843	8896	6	17	increased
1	8898	8912	3	0	unchanged
1	8914	8922	1	0	unchanged
1	8924	8953	11	1	decreased
1	8955	8960	3	0	unchanged
1	8962	8968	0	0	unchanged
1	8970	8990	1	8	increased
1	8992	9007	8	1	decreased
1	9009	9022	6	0	decreased
1	9024	9043	3	0	unchanged
1	9045	9057	5	0	unchanged
1	9059	9102	0	48	increased
1	9104	9140	8	10	unchanged
1	9142	9163	9	1	decreased
1	9165	9178	5	0	unchanged
1	9180	9194	2	0	unchanged
1	9196	9235	20	4	decreased
1	9237	9247	3	0	unchanged
1	9249	9256	1	0	unchanged
1	9258	9284	10	1	decreased
1	9286	9316	13	0	decreased
1	9318	9349	5	1	unchanged
1	9351	9518	4	85	increased
1	9520	9621	5	34	increased
1	9623	9653	9	0	decreased
1	9655	9793	58	20	decreased
1	9795	9804	0	1	unchanged
1	9806	9814	1	0	unchanged
1	9816	9834	1	0	unchanged
1	9836	9868	5	2	unchanged
1	9870	9892	1	2	unchanged
1	9894	9934	21	3	decreased
1	9936	9978	12	1	decreased
1	9980	10027	6	10	unchanged
1	10029	10043	2	0	unchanged
1	10045	10060	2	2	unchanged
1	10062	10070	1	0	unchanged
1	10072	10090	14	0	decreased
1	10092	10097	0	0	unchanged
1	10099	10105	2	0	unchanged
1	10107	10135	25	0	decreased
1	10137	10148	4	0	unchanged
1	10150	10162	5	0	unchanged
1	10164	10172	5	0	unchanged
1	10174	10189	10	0	decreased
1	10191	10206	4	0	unchanged
1	10208	10223	6	1	decreased
1	10225	10246	3	4	unchanged
1	10248	10263	6	3	unchanged
1	10265	10276	1	0	unchanged
1	10278	10284	1	0	unchanged
1	10334	10339	1	0	unchanged
1	10341	10360	4	1	unchanged
1	10362	10397	1	7	unchanged
1	10399	10420	9	0	decreased
1	10422	10438	2	2	unchanged
1	10440	10487	6	6	unchanged
1	10489	10497	1	0	unchanged
1	10499	10508	4	0	unchanged
1	10510	10526	6	0	decreased
1	10528	10573	12	4	decreased
1	10575	10591	4	0	unchanged
1	10593	10609	1	0	unchanged
1	10611	10632	8	0	decreased
1	10634	10649	5	0	unchanged
1	10651	10660	0	0	unchanged
1	10662	10719	3	38	increased
1	10721	10739	9	0	decreased
1	10741	10789	11	4	decreased
1	10791	10840	12	7	unchanged
1	10842	10845	0	0	unchanged
1	10847	10922	10	26	increased
1	10924	11006	28	27	unchanged
1	11008	11048	13	2	decreased
1	11050	11070	7	0	decreased
1	11072	11080	1	0	unchanged
1	11082	11133	25	4	decreased
1	11135	11143	1	0	unchanged
1	11145	11163	5	0	unchanged
1	11165	11194	1	7	unchanged
1	11196	11213	4	1	unchanged
1	11215	11232	9	0	decreased
1	11234	11257	1	2	unchanged
1	11259	11279	0	9	increased
1	11281	11314	24	0	decreased
1	11316	11328	1	2	unchanged
1	11330	11352	5	2	unchanged
1	11354	11382	4	0	unchanged
1	11384	11395	1	5	unchanged
1	11397	11415	0	7	unchanged
1	11417	11438	2	0	unchanged
1	11440	11469	5	7	unchanged
1	11471	11483	0	1	unchanged
1	11485	11537	13	22	unchanged
1	11539	11544	0	0	unchanged
1	11546	11571	9	3	decreased
1	11573	11588	1	0	unchanged
1	11590	11639	24	6	decreased
1	11641	11672	7	4	unchanged
1	11674	11728	1	34	increased
1	11730	11763	15	1	decreased
1	11765	11782	7	0	decreased
1	11784	11811	13	2	decreased
1	11813	11836	0	5	unchanged
1	11838	11890	7	34	increased
1	11892	11962	2	41	increased
1	11964	12007	2	17	increased
1	12009	12043	20	1	decreased
1	12045	12085	12	2	decreased
1	12087	12103	4	0	unchanged
1	12105	12109	0	0	unchanged
1	12111	12165	2	35	increased
1	12167	12174	1	0	unchanged
1	12176	12231	29	1	decreased
1	12233	12249	1	0	unchanged
1	12251	12261	2	0	unchanged
1	12263	12309	29	4	decreased
1	12311	12334	4	0	unchanged
1	12336	12349	7	0	decreased
2	35	79	3	33	increased
2	81	92	5	0	unchanged
2	94	170	5	57	increased
2	172	188	1	0	unchanged
2	190	352	9	119	increased
2	354	360	0	3	unchanged
2	362	447	18	22	unchanged
2	449	463	0	2	unchanged
2	465	478	7	0	decreased
2	480	495	7	1	decreased
2	497	510	7	0	decreased
2	512	530	5	1	unchanged
2	532	543	3	0	unchanged
2	545	563	3	2	unchanged
2	565	581	7	0	decreased
2	583	590	1	0	unchanged
2	592	595	0	0	unchanged
2	597	659	28	7	decreased
2	661	766	3	80	increased
2	768	787	2	1	unchanged
2	789	846	5	62	increased
2	848	895	2	30	increased
2	897	927	8	1	decreased
2	929	979	14	3	decreased
2	981	1006	7	1	decreased
2	1008	1027	16	0	decreased
2	1029	1042	4	1	unchanged
2	1044	1060	2	2	unchanged
2	1062	1128	7	25	increased
2	1130	1181	2	42	increased
2	1183	1200	1	1	unchanged
2	1202	1214	5	0	unchanged
2	1216	1229	4	1	unchanged
2	1231	1258	6	2	decreased
2	1260	1272	2	2	unchanged
2	1274	1300	15	0	decreased
2	1302	1320	14	0	decreased
2	1322	1340	0	1	unchanged
2	1342	1351	2	0	unchanged
2	1353	1364	2	0	unchanged
2	1366	1379	3	0	unchanged
2	1381	1393	6	0	decreased
2	1395	1438	29	1	decreased
2	1440	1456	2	0	unchanged
2	1458	1469	1	0	unchanged
2	1471	1517	5	26	increased
2	1519	1546	7	3	decreased
2	1548	1571	0	4	unchanged
2	1573	1604	4	3	unchanged
2	1606	1626	3	0	unchanged
2	1628	1636	4	0	unchanged
2	1638	1662	8	0	decreased
2	1664	1691	14	0	decreased
2	1693	1808	7	42	increased
2	1810	1829	1	4	unchanged
2	1831	1861	21	0	decreased
2	1863	1866	0	0	unchanged
2	1868	1907	25	0	decreased
2	1909	1927	6	1	decreased
2	1929	1939	1	0	unchanged
2	1941	1954	6	1	decreased
2	1956	1974	5	0	unchanged
2	1976	1999	7	0	decreased
2	2001	2035	11	1	decreased
2	2037	2051	4	0	unchanged
2	2053	2102	1	15	increased
2	2104	2116	3	1	unchanged
2	2118	2131	4	0	unchanged
2	2133	2149	3	0	unchanged
2	2151	2174	6	0	decreased
2	2176	2191	6	0	decreased
2	2193	2209	3	0	unchanged
2	2211	2228	1	1	unchanged
2	2230	2259	4	2	unchanged
2	2261	2290	9	1	decreased
2	2292	2309	4	1	unchanged
2	2311	2335	10	0	decreased
2	2337	2342	3	0	unchanged
2	2344	2358	7	0	decreased
2	2360	2380	18	1	decreased
2	2382	2399	0	9	increased
2	2401	2415	1	6	unchanged
2	2417	2441	5	1	unchanged
2	2443	2495	2	27	increased
2	2497	2536	3	13	increased
2	2538	2701	7	81	increased
2	2703	2748	20	1	decreased
2	2750	2754	1	0	unchanged
2	2756	2774	10	0	decreased
2	2776	2791	2	1	unchanged
2	2793	2813	6	0	decreased
2	2815	2818	0	0	unchanged
2	2820	2888	10	11	unchanged
2	2890	2940	13	12	unchanged
2	2942	2946	0	0	unchanged
2	2948	2973	3	4	unchanged
2	2975	3046	8	40	increased
2	3048	3063	2	0	unchanged
2	3065	3085	11	0	decreased
2	3087	3105	3	0	unchanged
2	3107	3132	6	0	decreased
2	3134	3152	5	0	unchanged
2	3154	3163	3	0	unchanged
2	3165	3190	1	2	unchanged
2	3192	3208	3	0	unchanged
2	3210	3227	1	1	unchanged
2	3229	3239	1	0	unchanged
2	3241	3257	6	0	decreased
2	3259	3265	0	0	unchanged
2	3267	3273	2	0	unchanged
2	3275	3291	1	3	unchanged
2	3293	3331	1	22	increased
2	3333	3373	8	1	decreased
2	3375	3415	9	2	decreased
2	3417	3433	6	0	decreased
2	3435	3445	1	1	unchanged
2	3447	3458	0	0	unchanged
2	3460	3479	13	0	decreased
2	3481	3505	11	1	decreased
2	3507	3525	9	0	decreased
2	3527	3566	3	7	unchanged
2	3568	3585	0	2	unchanged
2	3587	3619	5	0	unchanged
2	3621	3655	11	2	decreased
2	3657	3673	5	0	unchanged
2	3675	3697	1	3	unchanged
2	3699	3733	8	6	unchanged
2	3735	3741	2	0	unchanged
2	3743	3755	4	1	unchanged
2	3757	3796	13	6	decreased
2	3798	3844	0	39	increased
2	3846	3962	4	60	increased
2	3964	4007	1	22	increased
2	4009	4024	3	0	unchanged
2	4026	4038	0	5	unchanged
2	4040	4210	11	78	increased
2	4212	4233	1	5	unchanged
2	4235	4257	4	3	unchanged
2	4259	4277	3	0	unchanged
2	4279	4291	6	0	decreased
2	4293	4302	3	0	unchanged
2	4304	4319	5	0	unchanged
2	4321	4371	4	17	increased
2	4373	4388	1	0	unchanged
2	4390	4417	0	0	unchanged
2	4419	4424	0	3	unchanged
2	4426	4442	0	9	increased
2	4444	4451	1	0	unchanged
2	4453	4473	0	9	increased
2	4497	4515	0	4	unchanged
2	4593	4612	0	4	unchanged
2	4773	4792	2	11	increased
2	4794	4800	1	1	unchanged
2	4802	4823	2	1	unchanged
2	4825	4830	1	1	unchanged
2	4832	4847	2	1	unchanged
2	4849	4861	3	2	unchanged
2	4863	4891	6	1	decreased
2	4893	4907	0	0	unchanged
2	4909	4952	12	17	unchanged
2	4954	4961	1	0	unchanged
2	4963	4987	2	11	increased
2	4989	4997	0	0	unchanged
2	4999	5005	1	0	unchanged
2	5007	5045	15	3	decreased
2	5047	5052	1	0	unchanged
2	5054	5059	0	2	unchanged
2	5061	5081	7	0	decreased
2	5083	5094	1	0	unchanged
2	5096	5125	11	1	decreased
2	5127	5144	1	0	unchanged
2	5146	5154	1	0	unchanged
2	5156	5168	0	3	unchanged
2	5170	5282	5	110	increased
2	5284	5293	0	0	unchanged
2	5295	5307	2	0	unchanged
2	5309	5335	5	5	unchanged
2	5337	5360	1	4	unchanged
2	5362	5445	9	37	increased
2	5447	5461	7	0	decreased
2	5463	5469	1	0	unchanged
2	5471	5514	4	3	unchanged
2	5516	5560	2	0	unchanged
2	5562	5572	0	0	unchanged
2	5574	5590	1	3	unchanged
2	5592	5611	1	0	unchanged
2	5613	5630	1	0	unchanged
2	5632	5639	0	0	unchanged
2	5641	5666	10	1	decreased
2	5668	5673	4	0	unchanged
2	5675	5691	1	0	unchanged
2	5693	5711	5	1	unchanged
2	5713	5737	4	0	unchanged
2	5739	5769	1	33	increased
2	5771	5927	3	111	increased
2	5929	5937	0	0	unchanged
2	5939	5985	6	18	increased
2	5987	6007	0	8	increased
2	6009	6019	1	1	unchanged
2	6021	6048	4	2	unchanged
2	6050	6072	3	0	unchanged
2	6074	6093	7	1	decreased
2	6095	6106	0	0	unchanged
2	6108	6126	10	0	decreased
2	6128	6162	1	20	increased
2	6164	6235	1	46	increased
2	6237	6316	5	47	increased
2	6318	6389	0	52	increased
2	6391	6413	10	0	decreased
2	6415	6432	6	0	decreased
2	6434	6440	0	0	unchanged
2	6442	6469	3	0	unchanged
2	6471	6475	0	0	unchanged
2	6477	6534	1	51	increased
2	6536	6539	0	0	unchanged
2	6541	6556	0	1	unchanged
2	6558	6561	0	0	unchanged
2	6563	6573	0	0	unchanged
2	6575	6594	0	7	unchanged
2	6596	6604	0	1	unchanged
2	6606	6630	0	4	unchanged
2	6632	6648	0	4	unchanged
2	6650	6696	9	3	decreased
2	6698	6731	7	0	decreased
2	6733	6760	3	1	unchanged
2	6762	6784	0	11	increased
2	6786	6831	13	3	decreased
2	6833	6857	1	21	increased
2	6859	6930	4	43	increased
2	6932	6981	7	9	unchanged
2	6983	7078	5	60	increased
2	7080	7144	4	18	increased
2	7146	7172	1	7	unchanged
2	7174	7190	0	0	unchanged
2	7192	7262	22	5	decreased
2	7264	7325	25	6	decreased
2	7327	7373	12	4	decreased
2	7375	7434	8	25	increased
2	7436	7465	11	1	decreased
2	7467	7493	2	4	unchanged
2	7495	7521	2	4	unchanged
2	7523	7566	13	1	decreased
2	7568	7607	12	5	decreased
2	7609	7616	3	0	unchanged
2	7618	7643	2	7	unchanged
2	7645	7678	7	4	unchanged
2	7680	7722	1	20	increased
2	7724	7762	1	19	increased
2	7764	7808	2	15	increased
2	7810	7857	2	21	increased
2	7859	7873	4	1	unchanged
2	7875	7908	3	7	unchanged
2	7910	7943	1	8	increased
2	7945	7985	7	16	increased
2	7987	7999	4	0	unchanged
2	8001	8031	16	0	decreased
2	8033	8042	2	0	unchanged
2	8044	8103	35	1	decreased
2	8105	8141	2	9	increased
2	8143	8160	4	1	unchanged
2	8162	8198	1	26	increased
2	8200	8270	16	15	unchanged
2	8272	8291	8	0	decreased
2	8293	8307	0	0	unchanged
2	8309	8341	7	3	decreased
2	8343	8350	0	1	unchanged
2	8352	8365	5	0	unchanged
2	8367	8405	2	8	increased
2	8407	8441	0	9	increased
2	8443	8449	1	0	unchanged
2	8451	8457	0	0	unchanged
2	8459	8491	4	2	unchanged
2	8493	8513	0	13	increased
2	8515	8559	14	1	decreased
2	8561	8589	1	8	increased
2	8591	8618	17	0	decreased
2	8620	8650	21	0	decreased
2	8652	8671	7	0	decreased
2	8673	8680	4	0	unchanged
2	8682	8704	13	0	decreased
2	8706	8764	14	6	decreased
2	8766	8801	15	0	decreased
2	8803	8826	0	2	unchanged
2	8828	8848	1	2	unchanged
2	8850	8877	4	0	unchanged
2	8879	8900	0	6	unchanged
2	8902	8934	8	10	unchanged
2	8936	8939	0	1	unchanged
2	8941	8947	0	1	unchanged
2	8949	8974	1	1	unchanged
2	8976	8999	0	1	unchanged
2	9001	9047	12	5	decreased
2	9049	9096	13	6	decreased
2	9098	9121	7	0	decreased
2	9123	9129	0	0	unchanged
2	9131	9151	2	0	unchanged
2	9153	9180	9	1	decreased
2	9182	9195	2	0	unchanged
2	9197	9270	4	32	increased
2	9272	9308	2	4	unchanged
2	9310	9367	1	18	increased
2	9369	9378	5	0	unchanged
2	9380	9417	3	5	unchanged
2	9419	9469	41	1	decreased
2	9471	9494	9	0	decreased
2	9496	9516	12	0	decreased
2	9518	9525	5	0	unchanged
2	9527	9546	8	0	decreased
2	9548	9560	2	0	unchanged
2	9562	9592	9	1	decreased
2	9594	9620	14	0	decreased
2	9622	9628	2	0	unchanged
2	9630	9653	8	1	decreased
2	9655	9807	8	63	increased
2	9809	9828	1	1	unchanged
2	9830	9846	2	0	unchanged
2	9848	9857	2	0	unchanged
2	9859	9883	9	3	decreased
2	9885	9918	8	1	decreased
2	9920	9951	3	2	unchanged
2	9953	9957	0	2	unchanged
2	9959	10039	24	13	unchanged
2	10041	10070	11	3	decreased
2	10072	10085	11	0	decreased
2	10087	10103	13	0	decreased
2	10105	10130	24	0	decreased
2	10132	10157	19	0	decreased
2	10159	10169	3	0	unchanged
2	10171	10201	8	4	unchanged
2	10203	10216	13	0	decreased
2	10218	10240	3	2	unchanged
2	10242	10343	50	19	decreased
2	10345	10375	2	4	unchanged
2	10377	10381	0	0	unchanged
2	10383	10390	0	0	unchanged
2	10392	10419	3	1	unchanged
2	10421	10430	1	0	unchanged
2	10432	10449	2	0	unchanged
2	10451	10460	3	2	unchanged
2	10462	10508	2	27	increased
2	10510	10543	5	6	unchanged
2	10545	10556	1	1	unchanged
2	10558	10563	0	0	unchanged
2	10565	10604	3	7	unchanged
2	10606	10674	6	26	increased
2	10676	10704	4	3	unchanged
2	10706	10809	29	24	unchanged
2	10811	10847	22	2	decreased
2	10849	10867	18	0	decreased
2	10869	10876	3	0	unchanged
2	10878	10932	31	0	decreased
2	10934	10949	8	0	decreased
2	10951	10976	25	0	decreased
2	10978	10991	7	0	decreased
2	10993	11012	8	2	decreased
2	11014	11020	4	0	unchanged
2	11022	11026	1	0	unchanged
2	11028	11076	11	3	decreased
2	11078	11125	7	10	unchanged
2	11127	11143	0	4	unchanged
2	11145	11175	2	11	increased
2	11177	11188	5	0	unchanged
2	11190	11240	30	0	decreased
2	11242	11259	4	0	unchanged
2	11261	11282	6	1	decreased
2	11284	11298	8	0	decreased
2	11300	11326	0	3	unchanged
2	11328	11399	30	13	decreased
2	11401	11406	0	2	unchanged
2	11408	11436	6	3	unchanged
2	11438	11476	4	5	unchanged
2	11478	11530	11	8	unchanged
2	11532	11585	47	3	decreased
2	11587	11595	0	1	unchanged
2	11597	11617	16	1	decreased
2	11619	11622	1	0	unchanged
2	11624	11631	1	0	unchanged
2	11633	11671	13	1	decreased
2	11673	11709	3	5	unchanged
2	11711	11740	5	9	unchanged
2	11742	11771	3	4	unchanged
2	11773	11802	13	0	decreased
2	11804	11833	2	7	unchanged
2	11835	11861	3	7	unchanged
2	11863	11900	8	5	unchanged
2	11902	11916	19	0	decreased
2	11918	11923	1	0	unchanged
2	11925	11934	2	0	unchanged
2	11936	11960	15	0	decreased
2	11962	11997	18	3	decreased
2	11999	12048	5	19	increased
2	12050	12055	0	0	unchanged
2	12057	12071	2	1	unchanged
2	12073	12087	2	2	unchanged
2	12089	12109	7	1	decreased
3	161	216	1	75	increased
3	218	233	1	5	unchanged
3	235	262	5	5	unchanged
3	264	422	8	146	increased
3	424	433	2	0	unchanged
3	435	450	5	0	unchanged
3	452	469	0	8	increased
3	471	476	3	0	unchanged
3	478	487	0	4	unchanged
3	489	517	13	1	decreased
3	519	540	1	12	increased
3	542	555	1	8	increased
3	557	569	2	0	unchanged
3	571	595	9	0	decreased
3	597	606	0	2	unchanged
3	608	629	1	2	unchanged
3	631	651	7	0	decreased
3	653	676	0	7	unchanged
3	678	685	1	0	unchanged
3	687	694	0	4	unchanged
3	696	708	0	4	unchanged
3	710	734	10	0	decreased
3	736	756	0	3	unchanged
3	758	773	3	2	unchanged
3	775	780	0	0	unchanged
3	782	791	4	0	unchanged
3	793	815	10	0	decreased
3	817	830	6	0	decreased
3	832	865	10	0	decreased
3	867	872	0	0	unchanged
3	874	894	6	0	decreased
3	896	925	0	5	unchanged
3	927	997	4	46	increased
3	999	1016	2	0	unchanged
3	1018	1108	33	27	unchanged
3	1110	1149	2	16	increased
3	1151	1200	25	5	decreased
3	1202	1214	0	0	unchanged
3	1216	1237	4	3	unchanged
3	1239	1284	7	3	decreased
3	1286	1295	0	1	unchanged
3	1297	1355	0	59	increased
3	1357	1365	0	0	unchanged
3	1367	1388	14	0	decreased
3	1390	1421	4	9	increased
3	1423	1502	17	20	unchanged
3	1504	1539	6	1	decreased
3	1541	1580	14	2	decreased
3	1582	1625	7	9	unchanged
3	1627	1636	3	0	unchanged
3	1638	1649	3	1	unchanged
3	1651	1656	1	0	unchanged
3	1658	1694	16	3	decreased
3	1696	1733	2	21	increased
3	1735	1800	2	24	increased
3	1802	1839	7	13	unchanged
3	1841	1851	0	0	unchanged
3	1853	1870	9	0	decreased
3	1872	1893	3	5	unchanged
3	1895	1902	0	0	unchanged
3	1904	1917	2	0	unchanged
3	1919	1926	2	0	unchanged
3	1928	1956	5	3	unchanged
3	1958	1971	3	4	unchanged
3	1973	2018	7	9	unchanged
3	2020	2061	2	28	increased
3	2063	2097	4	8	unchanged
3	2099	2113	2	0	unchanged
3	2115	2131	0	8	increased
3	2133	2145	2	1	unchanged
3	2147	2177	2	4	unchanged
3	2179	2189	1	1	unchanged
3	2191	2217	3	4	unchanged
3	2219	2225	0	0	unchanged
3	2227	2250	3	7	unchanged
3	2252	2278	7	0	decreased
3	2280	2287	0	0	unchanged
3	2289	2298	1	0	unchanged
3	2300	2336	7	9	unchanged
3	2338	2347	0	0	unchanged
3	2349	2372	7	0	decreased
3	2374	2392	14	0	decreased
3	2394	2411	15	0	decreased
3	2413	2424	3	0	unchanged
3	2426	2436	5	0	unchanged
3	2438	2452	12	0	decreased
3	2454	2477	17	0	decreased
3	2479	2487	1	0	unchanged
3	2489	2508	8	0	decreased
3	2510	2518	3	0	unchanged
3	2520	2530	0	1	unchanged
3	2532	2576	4	20	increased
3	2578	2599	1	2	unchanged
3	2601	2609	1	0	unchanged
3	2611	2622	5	0	unchanged
3	2624	2637	12	0	decreased
3	2639	2657	11	0	decreased
3	2659	2663	0	0	unchanged
3	2665	2697	0	17	increased
3	2699	2722	0	26	increased
3	2724	2741	0	12	increased
3	2743	2777	16	1	decreased
3	2779	2789	1	1	unchanged
3	2791	2829	4	17	increased
3	2831	2854	3	2	unchanged
3	2856	2877	1	4	unchanged
3	2879	2893	5	0	unchanged
3	2895	2915	5	0	unchanged
3	2917	2926	1	0	unchanged
3	2928	2977	5	20	increased
3	2979	2995	1	3	unchanged
3	2997	3075	9	49	increased
3	3077	3114	7	3	decreased
3	3116	3165	1	38	increased
3	3167	3192	0	3	unchanged
3	3194	3224	13	1	decreased
3	3226	3268	3	14	increased
3	3270	3286	2	0	unchanged
3	3288	3346	12	2	decreased
3	3348	3451	8	101	increased
3	3453	3474	1	2	unchanged
3	3476	3486	0	2	unchanged
3	3488	3503	3	0	unchanged
3	3505	3526	0	4	unchanged
3	3528	3550	5	7	unchanged
3	3552	3587	9	2	decreased
3	3589	3645	26	5	decreased
3	3647	3656	2	0	unchanged
3	3658	3673	0	3	unchanged
3	3675	3695	4	0	unchanged
3	3697	3762	1	41	increased
3	3764	3785	1	9	increased
3	3787	3835	2	30	increased
3	3837	3850	0	4	unchanged
3	3852	3935	17	18	unchanged
3	3937	3955	7	0	decreased
3	3957	3977	1	1	unchanged
3	3979	4065	6	36	increased
3	4067	4114	7	4	unchanged
3	4116	4293	4	78	increased
3	4295	4333	1	21	increased
3	4335	4364	3	4	unchanged
3	4366	4379	0	0	unchanged
3	4381	4411	6	2	decreased
3	4413	4460	2	17	increased
3	4462	4512	2	23	increased
3	4694	4722	0	8	increased
3	4724	4828	6	41	increased
3	4830	4872	2	23	increased
3	4874	4887	0	1	unchanged
3	4889	4915	0	6	unchanged
3	4917	4925	1	1	unchanged
3	4927	4976	35	2	decreased
3	4978	5001	13	0	decreased
3	5003	5020	6	0	decreased
3	5022	5071	20	1	decreased
3	5073	5097	4	0	unchanged
3	5099	5114	0	4	unchanged
3	5116	5197	2	24	increased
3	5199	5212	0	0	unchanged
3	5214	5262	13	7	unchanged
3	5264	5345	45	7	decreased
3	5347	5363	2	0	unchanged
3	5365	5417	8	6	unchanged
3	5419	5434	0	7	unchanged
3	5436	5470	1	11	increased
3	5472	5564	31	21	unchanged
3	5566	5569	1	0	unchanged
3	5571	5590	13	0	decreased
3	5592	5613	2	2	unchanged
3	5615	5636	4	3	unchanged
3	5638	5671	5	4	unchanged
3	5673	5691	2	1	unchanged
3	5693	5700	0	0	unchanged
3	5702	5726	9	0	decreased
3	5728	5745	5	0	unchanged
3	5747	5778	4	2	unchanged
3	5780	5824	2	17	increased
3	5826	5863	7	9	unchanged
3	5865	5888	0	1	unchanged
3	5890	5929	1	25	increased
3	5931	5942	0	0	unchanged
3	5944	5972	7	0	decreased
3	5974	5997	6	0	decreased
3	5999	6007	1	0	unchanged
3	6009	6013	0	0	unchanged
3	6015	6026	1	0	unchanged
3	6028	6062	0	9	increased
3	6064	6105	2	22	increased
3	6107	6120	3	0	unchanged
3	6122	6150	7	3	decreased
3	6152	6165	2	0	unchanged
3	6167	6214	28	1	decreased
3	6216	6221	0	0	unchanged
3	6223	6231	4	0	unchanged
3	6233	6267	21	1	decreased
3	6269	6281	3	0	unchanged
3	6283	6308	9	2	decreased
3	6310	6336	2	1	unchanged
3	6338	6364	0	8	increased
3	6366	6389	6	0	decreased
3	6391	6417	15	0	decreased
3	6419	6431	5	0	unchanged
3	6433	6451	5	1	unchanged
3	6453	6466	6	0	decreased
3	6468	6491	14	1	decreased
3	6493	6519	0	14	increased
3	6521	6529	0	2	unchanged
3	6531	6562	3	6	unchanged
3	6564	6606	1	18	increased
3	6608	6621	15	0	decreased
3	6623	6658	2	18	increased
3	6660	6680	3	3	unchanged
3	6682	6701	7	0	decreased
3	6703	6713	5	0	unchanged
3	6715	6782	4	25	increased
3	6784	6787	0	0	unchanged
3	6789	6838	24	1	decreased
3	6840	6888	1	34	increased
3	6890	6933	13	3	decreased
3	6935	6955	0	4	unchanged
3	6957	6981	0	17	increased
3	6983	7031	1	49	increased
3	7033	7048	2	3	unchanged
3	7050	7085	24	1	decreased
3	7087	7113	10	0	decreased
3	7115	7125	0	1	unchanged
3	7127	7136	1	0	unchanged
3	7138	7174	3	8	increased
3	7176	7227	5	10	unchanged
3	7229	7274	2	12	increased
3	7276	7288	0	1	unchanged
3	7290	7294	3	0	unchanged
3	7296	7302	0	0	unchanged
3	7304	7315	3	1	unchanged
3	7317	7355	10	3	decreased
3	7357	7403	5	3	unchanged
3	7405	7433	5	2	unchanged
3	7435	7451	9	0	decreased
3	7453	7460	4	0	unchanged
3	7462	7478	9	0	decreased
3	7480	7497	6	0	decreased
3	7499	7514	2	0	unchanged
3	7516	7543	0	2	unchanged
3	7545	7582	8	3	decreased
3	7584	7611	10	1	decreased
3	7613	7616	0	0	unchanged
3	7618	7688	15	20	unchanged
3	7690	7700	1	0	unchanged
3	7702	7754	29	14	decreased
3	7756	7783	1	2	unchanged
3	7785	7812	3	4	unchanged
3	7814	7844	22	1	decreased
3	7846	7861	6	0	decreased
3	7863	7891	4	3	unchanged
3	7893	7917	2	2	unchanged
3	7919	7925	7	0	decreased
3	7927	7949	3	1	unchanged
3	7951	7966	0	1	unchanged
3	7968	7978	2	0	unchanged
3	7980	7987	1	0	unchanged
3	7989	8013	9	0	decreased
3	8015	8032	1	4	unchanged
3	8034	8060	8	5	unchanged
3	8062	8139	15	19	unchanged
3	8141	8160	1	3	unchanged
3	8162	8247	4	25	increased
3	8249	8354	5	63	increased
3	8356	8382	1	8	increased
3	8384	8393	1	0	unchanged
3	8395	8410	0	0	unchanged
3	8412	8429	0	2	unchanged
3	8431	8475	10	10	unchanged
3	8477	8492	1	2	unchanged
3	8494	8530	17	0	decreased
3	8532	8566	10	2	decreased
3	8568	8575	2	0	unchanged
3	8577	8605	22	2	decreased
3	8607	8624	0	0	unchanged
3	8626	8652	2	6	unchanged
3	8654	8690	10	5	unchanged
3	8692	8706	5	0	unchanged
3	8708	8747	8	4	unchanged
3	8749	8810	39	6	decreased
3	8812	8833	0	6	unchanged
3	8835	8906	47	4	decreased
3	8908	8936	2	3	unchanged
3	8938	8954	2	0	unchanged
3	8956	8965	1	2	unchanged
3	8967	9017	4	28	increased
3	9019	9069	2	22	increased
3	9071	9122	3	30	increased
3	9124	9129	0	0	unchanged
3	9131	9139	2	0	unchanged
3	9141	9157	1	1	unchanged
3	9159	9178	9	1	decreased
3	9180	9202	9	0	decreased
3	9204	9212	0	0	unchanged
3	9214	9227	2	0	unchanged
3	9229	9266	17	1	decreased
3	9268	9282	8	0	decreased
3	9284	9316	10	1	decreased
3	9318	9326	0	2	unchanged
3	9328	9344	1	1	unchanged
3	9346	9371	10	1	decreased
3	9373	9435	42	6	decreased
3	9437	9443	0	0	unchanged
3	9445	9483	3	7	unchanged
3	9485	9497	7	0	decreased
3	9499	9509	1	0	unchanged
3	9511	9523	2	0	unchanged
3	9525	9537	0	3	unchanged
3	9539	9555	0	1	unchanged
3	9557	9609	2	27	increased
3	9611	9667	7	32	increased
3	9669	9705	7	2	decreased
3	9707	9716	1	0	unchanged
3	9718	9750	12	3	decreased
3	9752	9767	3	0	unchanged
3	9769	9786	7	1	decreased
3	9788	9796	1	0	unchanged
3	9798	9814	11	0	decreased
3	9816	9821	1	0	unchanged
3	9823	9835	11	0	decreased
3	9837	9846	4	0	unchanged
4	36	48	3	0	unchanged
4	50	67	6	0	decreased
4	69	85	3	0	unchanged
4	87	96	8	0	decreased
4	98	109	3	0	unchanged
4	111	126	6	0	decreased
4	128	137	6	0	decreased
4	139	153	8	0	decreased
4	155	174	7	0	decreased
4	176	198	2	3	unchanged
4	200	211	0	1	unchanged
4	213	220	0	0	unchanged
4	222	247	12	0	decreased
4	249	293	36	0	decreased
4	295	310	0	11	increased
4	312	329	0	5	unchanged
4	331	344	7	0	decreased
4	346	354	3	0	unchanged
4	356	388	6	7	unchanged
4	390	409	7	0	decreased
4	411	422	1	0	unchanged
4	424	431	2	0	unchanged
4	433	445	0	6	unchanged
4	447	470	0	13	increased
4	472	484	0	8	increased
4	486	502	0	29	increased
4	504	527	2	2	unchanged
4	529	591	4	46	increased
4	593	635	2	44	increased
4	637	679	1	23	increased
4	681	760	21	18	unchanged
4	762	773	1	0	unchanged
4	775	787	2	0	unchanged
4	789	800	1	3	unchanged
4	802	813	0	0	unchanged
4	815	822	0	1	unchanged
4	824	875	21	3	decreased
4	877	932	9	29	increased
4	934	959	1	3	unchanged
4	961	1035	25	6	decreased
4	1037	1072	1	27	increased
4	1074	1087	1	3	unchanged
4	1089	1121	2	12	increased
4	1123	1139	1	1	unchanged
4	1141	1182	1	24	increased
4	1184	1223	5	17	increased
4	1225	1269	8	4	unchanged
4	1271	1294	3	8	increased
4	1296	1321	9	1	decreased
4	1323	1351	5	1	unchanged
4	1353	1382	1	6	unchanged
4	1384	1389	0	1	unchanged
4	1391	1453	6	18	increased
4	1455	1532	3	26	increased
4	1534	1587	7	16	increased
4	1589	1661	5	14	increased
4	1663	1670	0	1	unchanged
4	1672	1676	0	0	unchanged
4	1678	1728	10	6	unchanged
4	1730	1738	0	0	unchanged
4	1740	1800	2	29	increased
4	1802	1807	0	0	unchanged
4	1809	1872	0	58	increased
4	1874	1877	0	0	unchanged
4	1879	1890	0	5	unchanged
4	1892	1901	0	0	unchanged
4	1903	1942	3	10	increased
4	1944	1959	7	0	decreased
4	1961	1971	2	0	unchanged
4	1973	1982	3	0	unchanged
4	1984	2000	9	0	decreased
4	2002	2015	3	0	unchanged
4	2017	2045	6	0	decreased
4	2047	2062	8	1	decreased
4	2064	2085	7	0	decreased
4	2087	2098	0	3	unchanged
4	2100	2126	4	10	increased
4	2128	2147	0	6	unchanged
4	2149	2234	4	29	increased
4	2236	2340	2	75	increased
4	2342	2372	0	7	unchanged
4	2374	2380	1	0	unchanged
4	2382	2399	4	0	unchanged
4	2401	2406	1	0	unchanged
4	2408	2413	0	0	unchanged
4	2415	2427	2	1	unchanged
4	2429	2451	5	1	unchanged
4	2663	2669	0	2	unchanged
4	2671	2693	3	1	unchanged
4	2695	2757	47	5	decreased
4	2759	2791	4	0	unchanged
4	2793	2811	0	7	unchanged
4	2813	2822	1	0	unchanged
4	2824	2836	0	0	unchanged
4	2838	2863	1	10	increased
4	2865	2891	4	6	unchanged
4	2893	2899	4	0	unchanged
4	2901	2913	2	3	unchanged
4	2915	2979	1	26	increased
4	2981	3001	0	1	unchanged
4	3003	3052	3	15	increased
4	3054	3276	17	84	increased
4	3278	3415	36	62	unchanged
4	3417	3452	5	9	unchanged
4	3454	3508	9	14	unchanged
4	3510	3524	0	3	unchanged
4	3526	3572	0	19	increased
4	3574	3593	5	0	unchanged
4	3595	3630	4	2	unchanged
4	3632	3656	0	13	increased
4	3658	3666	0	0	unchanged
4	3668	3697	0	6	unchanged
4	3699	3706	2	0	unchanged
4	3708	3752	7	5	unchanged
4	3754	3781	6	0	decreased
4	3783	3825	5	20	increased
4	3827	3842	6	0	decreased
4	3844	3850	1	2	unchanged
4	3852	3866	2	0	unchanged
4	3868	3885	13	1	decreased
4	3887	3900	4	0	unchanged
4	3902	3907	0	0	unchanged
4	3909	3933	1	9	increased
4	3935	3939	1	0	unchanged
4	3941	3975	10	1	decreased
4	3977	3992	6	1	decreased
4	3994	4039	2	17	increased
4	4041	4057	8	1	decreased
4	4059	4062	3	0	unchanged
4	4064	4099	2	3	unchanged
4	4101	4115	2	2	unchanged
4	4117	4164	0	39	increased
4	4166	4187	7	1	decreased
4	4189	4197	7	0	decreased
4	4199	4219	4	0	unchanged
4	4221	4245	5	0	unchanged
4	4247	4273	1	13	increased
4	4275	4296	9	1	decreased
4	4298	4334	2	6	unchanged
4	4336	4350	6	0	decreased
4	4352	4357	0	0	unchanged
4	4359	4369	0	0	unchanged
4	4371	4392	5	2	unchanged
4	4394	4408	3	0	unchanged
4	4410	4420	2	0	unchanged
4	4422	4438	0	3	unchanged
4	4440	4446	1	0	unchanged
4	4448	4456	1	0	unchanged
4	4458	4472	3	0	unchanged
4	4474	4503	6	3	unchanged
4	4505	4517	1	0	unchanged
4	4519	4544	2	2	unchanged
4	4546	4559	0	2	unchanged
4	4561	4667	4	42	increased
4	4669	4735	5	31	increased
4	4737	4755	0	4	unchanged
4	4757	4777	10	0	decreased
4	4779	4784	0	0	unchanged
4	4786	4803	2	1	unchanged
4	4805	4950	7	84	increased
4	4952	5001	24	2	decreased
4	5003	5021	4	1	unchanged
4	5023	5043	0	4	unchanged
4	5045	5102	10	5	unchanged
4	5104	5112	0	0	unchanged
4	5114	5165	5	1	unchanged
4	5167	5204	17	2	decreased
4	5206	5243	1	21	increased
4	5245	5290	1	21	increased
4	5292	5300	0	2	unchanged
4	5302	5322	3	0	unchanged
4	5324	5329	0	0	unchanged
4	5331	5357	7	0	decreased
4	5359	5391	12	0	decreased
4	5393	5433	4	3	unchanged
4	5435	5444	0	0	unchanged
4	5446	5478	2	11	increased
4	5480	5517	5	6	unchanged
4	5519	5544	6	3	unchanged
4	5546	5574	6	4	unchanged
4	5576	5629	7	8	unchanged
4	5631	5649	2	0	unchanged
4	5651	5659	1	0	unchanged
4	5661	5677	0	2	unchanged
4	5679	5695	0	1	unchanged
4	5697	5700	0	0	unchanged
4	5702	5712	1	0	unchanged
4	5714	5734	6	0	decreased
4	5736	5766	11	0	decreased
4	5768	5784	0	0	unchanged
4	5786	5823	0	13	increased
4	5825	5959	8	72	increased
4	5961	5979	3	0	unchanged
4	5981	5994	8	0	decreased
4	5996	6010	8	1	decreased
4	6012	6022	1	0	unchanged
4	6024	6049	11	1	decreased
4	6051	6113	11	11	unchanged
4	6115	6118	0	0	unchanged
4	6120	6137	1	3	unchanged
4	6139	6159	0	1	unchanged
4	6161	6175	2	0	unchanged
4	6177	6193	25	0	decreased
4	6195	6230	17	1	decreased
4	6232	6261	11	4	decreased
4	6263	6310	10	0	decreased
4	6312	6332	1	1	unchanged
4	6334	6376	8	1	decreased
4	6378	6425	5	6	unchanged
4	6427	6434	2	1	unchanged
4	6436	6503	23	8	decreased
4	6505	6597	4	44	increased
4	6599	6700	5	32	increased
4	6702	6793	29	21	unchanged
4	6795	6895	4	45	increased
4	6897	6921	3	1	unchanged
4	6923	6946	7	0	decreased
4	6948	6954	1	0	unchanged
4	6956	6996	8	2	decreased
4	6998	7016	6	0	decreased
4	7018	7022	0	0	unchanged
4	7024	7063	12	0	decreased
4	7065	7077	0	0	unchanged
4	7079	7089	0	0	unchanged
4	7091	7103	3	0	unchanged
4	7105	7152	18	4	decreased
4	7154	7204	23	7	decreased
4	7206	7221	5	0	unchanged
4	7223	7252	3	0	unchanged
4	7254	7302	8	16	unchanged
4	7304	7326	2	2	unchanged
4	7328	7343	1	2	unchanged
4	7345	7355	1	1	unchanged
4	7357	7396	2	11	increased
4	7398	7428	10	2	decreased
4	7430	7442	4	0	unchanged
4	7444	7513	4	24	increased
4	7515	7543	1	3	unchanged
4	7545	7558	7	0	decreased
4	7560	7599	11	5	decreased
4	7601	7626	10	0	decreased
4	7628	7667	15	0	decreased
4	7669	7685	7	0	decreased
4	7687	7702	3	0	unchanged
4	7704	7712	2	0	unchanged
4	7714	7727	0	0	unchanged
4	7729	7773	6	5	unchanged
4	7775	7814	4	13	increased
4	7816	7836	4	1	unchanged
4	7838	7843	0	0	unchanged
4	7845	7905	25	4	decreased
4	7907	7946	2	12	increased
4	7948	7956	1	0	unchanged
4	7958	7979	2	0	unchanged
4	7981	8019	24	2	decreased
4	8021	8107	3	56	increased
4	8109	8167	7	20	increased
4	8169	8216	3	16	increased
4	8218	8224	0	0	unchanged
4	8226	8283	0	45	increased
4	8285	8300	1	6	unchanged
4	8302	8320	0	2	unchanged
4	8322	8352	2	7	unchanged
4	8354	8378	2	5	unchanged
4	8380	8394	0	2	unchanged
4	8396	8453	1	15	increased
4	8455	8494	39	2	decreased
4	8496	8526	20	0	decreased
4	8528	8532	2	0	unchanged
4	8534	8551	1	1	unchanged
4	8553	8635	4	49	increased
4	8637	8659	0	2	unchanged
4	8661	8693	0	6	unchanged
4	8695	8710	2	0	unchanged
4	8712	8762	11	8	unchanged
4	8764	8780	0	1	unchanged
4	8782	8852	4	23	increased
4	8854	8862	0	0	unchanged
4	8864	8915	41	4	decreased
4	8917	8922	2	0	unchanged
4	8924	9018	8	36	increased
4	9020	9077	2	22	increased
4	9079	9096	0	4	unchanged
4	9098	9121	0	7	unchanged
4	9123	9170	10	10	unchanged
4	9172	9191	0	1	unchanged
4	9193	9218	10	0	decreased
4	9220	9231	2	0	unchanged
4	9233	9256	0	17	increased
4	9258	9278	4	4	unchanged
4	9280	9297	0	5	unchanged
4	9299	9303	0	0	unchanged
4	9305	9317	4	1	unchanged
4	9319	9325	0	1	unchanged
4	9327	9358	2	4	unchanged
4	9360	9374	0	8	increased
4	9376	9428	20	3	decreased
5	33	44	0	1	unchanged
5	46	59	0	1	unchanged
5	61	84	4	2	unchanged
5	86	102	1	8	increased
5	104	241	3	137	increased
5	243	272	0	8	increased
5	274	330	1	57	increased
5	332	338	0	0	unchanged
5	340	360	0	17	increased
5	362	392	0	19	increased
5	394	436	4	16	increased
5	438	458	5	0	unchanged
5	460	475	4	0	unchanged
5	477	514	15	1	decreased
5	516	521	0	0	unchanged
5	523	531	0	0	unchanged
5	533	559	2	4	unchanged
5	561	602	1	18	increased
5	604	697	8	42	increased
5	699	718	10	2	decreased
5	720	733	7	0	decreased
5	735	751	3	0	unchanged
5	753	808	4	15	increased
5	810	822	0	6	unchanged
5	824	860	23	2	decreased
5	862	920	1	26	increased
5	922	1072	13	64	increased
5	1074	1092	0	5	unchanged
5	1094	1222	3	45	increased
5	1224	1446	6	104	increased
5	1448	1577	6	45	increased
5	1579	1591	0	5	unchanged
5	1593	1605	0	1	unchanged
5	1607	1617	2	0	unchanged
5	1619	1629	3	0	unchanged
5	1631	1671	30	1	decreased
5	1673	1700	10	0	decreased
5	1702	1709	0	0	unchanged
5	1711	1723	0	0	unchanged
5	1725	1747	16	0	decreased
5	1749	1781	3	7	unchanged
5	1783	1801	1	2	unchanged
5	1803	1852	11	6	unchanged
5	1854	1867	5	0	unchanged
5	1869	1892	1	1	unchanged
5	1894	1918	2	11	increased
5	1920	1947	8	2	decreased
5	1949	1955	3	0	unchanged
5	1957	1967	0	0	unchanged
5	1969	1978	4	0	unchanged
5	1980	2043	8	25	increased
5	2045	2085	5	10	unchanged
5	2087	2093	0	0	unchanged
5	2095	2145	4	31	increased
5	2147	2179	6	4	unchanged
5	2181	2242	8	25	increased
5	2244	2286	0	24	increased
5	2511	2565	2	16	increased
5	2567	2598	0	16	increased
5	2600	2610	4	0	unchanged
5	2612	2619	4	0	unchanged
5	2621	2677	31	3	decreased
5	2679	2689	1	0	unchanged
5	2691	2710	11	0	decreased
5	2712	2724	4	0	unchanged
5	2726	2751	11	0	decreased
5	2753	2760	1	0	unchanged
5	2762	2776	9	0	decreased
5	2778	2809	7	1	decreased
5	2811	2827	1	2	unchanged
5	2829	2890	19	6	decreased
5	2892	2905	0	6	unchanged
5	2907	2922	0	2	unchanged
5	2924	2932	0	1	unchanged
5	2934	2954	0	3	unchanged
5	2956	2997	4	9	increased
5	2999	3008	1	1	unchanged
5	3010	3075	24	29	unchanged
5	3077	3083	0	0	unchanged
5	3085	3169	4	62	increased
5	3171	3203	0	7	unchanged
5	3205	3245	10	1	decreased
5	3247	3273	15	0	decreased
5	3275	3304	1	17	increased
5	3306	3323	0	1	unchanged
5	3325	3378	23	5	decreased
5	3380	3417	10	3	decreased
5	3419	3434	4	1	unchanged
5	3436	3444	0	0	unchanged
5	3446	3452	0	0	unchanged
5	3454	3486	0	0	unchanged
5	3488	3508	0	0	unchanged
5	3510	3523	0	0	unchanged
5	3525	3539	0	0	unchanged
5	3541	3548	5	0	unchanged
5	3550	3571	4	1	unchanged
5	3573	3581	3	0	unchanged
5	3583	3610	14	0	decreased
5	3612	3641	15	1	decreased
5	3643	3653	7	0	decreased
5	3655	3699	20	6	decreased
5	3701	3710	5	0	unchanged
5	3712	3731	5	2	unchanged
5	3733	3750	6	1	decreased
5	3752	3794	1	23	increased
5	3796	3805	0	0	unchanged
5	3807	3816	1	2	unchanged
5	3818	3840	11	1	decreased
5	3842	3879	7	1	decreased
5	3881	3914	23	2	decreased
5	3916	3940	8	1	decreased
5	3942	3959	1	2	unchanged
5	3961	3968	0	1	unchanged
5	3970	3986	2	1	unchanged
5	3988	3996	0	0	unchanged
5	3998	4028	4	3	unchanged
5	4030	4078	8	4	unchanged
5	4080	4147	10	17	unchanged
5	4149	4307	9	83	increased
5	4309	4315	0	0	unchanged
5	4317	4336	9	0	decreased
5	4338	4399	5	30	increased
5	4401	4485	18	19	unchanged
5	4487	4505	2	3	unchanged
5	4507	4538	4	3	unchanged
5	4540	4580	4	7	unchanged
5	4582	4647	28	5	decreased
5	4649	4658	0	2	unchanged
5	4660	4713	11	11	unchanged
5	4715	4741	1	5	unchanged
5	4743	4784	33	2	decreased
5	4786	4804	3	0	unchanged
5	4806	4825	5	0	unchanged
5	4827	4911	28	7	decreased
5	4913	4920	0	0	unchanged
5	4922	4983	1	29	increased
5	4985	5091	8	35	increased
5	5093	5125	7	5	unchanged
5	5127	5144	6	0	decreased
5	5146	5177	5	8	unchanged
5	5179	5270	1	38	increased
5	5272	5313	3	12	increased
5	5315	5333	1	2	unchanged
5	5335	5352	2	0	unchanged
5	5354	5386	4	1	unchanged
5	5388	5441	18	10	unchanged
5	5443	5502	7	16	increased
5	5504	5521	1	1	unchanged
5	5523	5540	2	2	unchanged
5	5542	5577	8	3	decreased
5	5579	5592	0	5	unchanged
5	5594	5608	1	1	unchanged
5	5610	5635	4	0	unchanged
5	5637	5647	1	1	unchanged
5	5649	5693	5	13	increased
5	5695	5729	2	20	increased
5	5731	5747	5	2	unchanged
5	5749	5759	0	1	unchanged
5	5761	5771	1	0	unchanged
5	5773	5792	0	2	unchanged
5	5794	5836	2	22	increased
5	5838	5915	15	20	unchanged
5	5917	5939	2	0	unchanged
5	5941	6008	25	22	unchanged
5	6010	6064	4	18	increased
5	6066	6075	3	0	unchanged
5	6077	6089	0	2	unchanged
5	6091	6137	17	13	unchanged
5	6139	6147	3	1	unchanged
5	6149	6197	5	22	increased
5	6199	6242	10	5	unchanged
5	6244	6283	4	13	increased
5	6285	6297	6	0	decreased
5	6299	6306	0	0	unchanged
5	6308	6342	1	9	increased
5	6344	6378	8	4	unchanged
5	6380	6410	6	4	unchanged
5	6412	6458	2	18	increased
5	6460	6525	6	23	increased
5	6527	6538	0	0	unchanged
5	6540	6570	7	4	unchanged
5	6572	6576	0	0	unchanged
5	6578	6591	6	0	decreased
5	6593	6620	13	0	decreased
5	6622	6667	3	14	increased
5	6669	6700	15	1	decreased
5	6702	6711	5	0	unchanged
5	6713	6738	9	1	decreased
5	6740	6758	1	11	increased
5	6760	6776	2	3	unchanged
5	6778	6806	4	7	unchanged
5	6808	6833	0	3	unchanged
5	6835	6848	0	0	unchanged
5	6850	6855	0	0	unchanged
5	6857	6875	1	0	unchanged
5	6877	6883	2	0	unchanged
5	6885	6888	1	0	unchanged
5	6890	6893	1	1	unchanged
5	6895	6936	35	2	decreased
5	6938	6948	5	0	unchanged
5	6950	6957	2	0	unchanged
5	6959	6971	0	1	unchanged
5	6973	6978	0	0	unchanged
5	6980	6987	1	0	unchanged
5	6989	7005	7	1	decreased
5	7007	7050	4	26	increased
5	7052	7066	5	0	unchanged
5	7068	7104	28	0	decreased
5	7106	7113	1	0	unchanged
5	7115	7138	10	1	decreased
5	7140	7178	27	1	decreased
5	7180	7277	31	33	unchanged
5	7279	7282	0	0	unchanged
5	7284	7292	1	1	unchanged
5	7294	7319	2	4	unchanged
5	7321	7328	0	1	unchanged
5	7330	7350	0	3	unchanged
5	7352	7361	0	4	unchanged
5	7363	7376	0	4	unchanged
5	7378	7389	1	2	unchanged
5	7391	7405	0	5	unchanged
5	7407	7433	12	0	decreased
5	7435	7448	7	0	decreased
5	7450	7459	1	0	unchanged
5	7461	7468	1	0	unchanged
5	7470	7495	19	0	decreased
5	7497	7508	5	0	unchanged
5	7510	7531	3	4	unchanged
5	7533	7558	2	5	unchanged
5	7560	7588	0	17	increased
5	7590	7641	6	14	increased
5	7643	7668	5	0	unchanged
5	7670	7692	5	1	unchanged
5	7694	7701	1	1	unchanged
5	7703	7716	5	0	unchanged
5	7718	7833	16	69	increased
5	7835	7845	1	0	unchanged
5	7847	7859	1	0	unchanged
5	7861	7929	19	11	unchanged
5	7931	7972	20	2	decreased
5	7974	7992	4	1	unchanged
5	7994	8143	7	111	increased
5	8145	8199	5	14	increased
5	8201	8349	8	85	increased
5	8351	8384	4	3	unchanged
5	8386	8399	1	0	unchanged
5	8401	8456	19	6	decreased
5	8458	8474	2	2	unchanged
5	8476	8481	0	2	unchanged
5	8483	8491	0	6	unchanged
5	8493	8505	1	4	unchanged
5	8507	8540	3	1	unchanged
5	8542	8566	3	2	unchanged
5	8568	8574	4	0	unchanged
5	8576	8591	9	1	decreased
5	8593	8605	1	0	unchanged
5	8607	8619	5	0	unchanged
5	8621	8635	6	0	decreased
5	8637	8651	3	0	unchanged
5	8653	8671	5	2	unchanged
5	8673	8687	0	7	unchanged
5	8689	8718	0	17	increased
5	8720	8748	0	34	increased
5	8750	8755	0	8	increased
5	8757	8790	1	7	unchanged
5	8792	8802	3	0	unchanged
5	8804	8825	4	2	unchanged
5	8827	8849	15	0	decreased
5	8851	8881	0	4	unchanged
5	8883	8900	3	11	increased
5	8902	8926	5	22	increased
5	8928	8966	17	1	decreased
5	8968	8974	1	0	unchanged
5	8976	9004	3	11	increased
6	78	138	18	10	unchanged
6	140	152	4	1	unchanged
6	154	187	15	0	decreased
6	189	201	4	0	unchanged
6	203	253	22	6	decreased
6	255	269	2	0	unchanged
6	271	302	3	7	unchanged
6	304	331	0	24	increased
6	333	363	5	8	unchanged
6	365	382	1	2	unchanged
6	384	404	2	4	unchanged
6	406	447	7	15	increased
6	449	523	18	13	unchanged
6	525	542	0	15	increased
6	544	577	9	1	decreased
6	579	614	22	1	decreased
6	616	631	1	0	unchanged
6	633	645	2	0	unchanged
6	647	667	3	4	unchanged
6	669	682	3	0	unchanged
6	684	690	1	0	unchanged
6	692	704	2	1	unchanged
6	706	782	31	9	decreased
6	784	813	3	3	unchanged
6	815	836	8	0	decreased
6	838	856	7	1	decreased
6	858	881	13	0	decreased
6	883	890	4	0	unchanged
6	892	915	18	0	decreased
6	917	926	3	0	unchanged
6	928	1004	6	42	increased
6	1006	1026	0	1	unchanged
6	1028	1079	5	9	unchanged
6	1081	1175	29	15	unchanged
6	1177	1219	0	16	increased
6	1221	1234	0	1	unchanged
6	1236	1254	7	0	decreased
6	1256	1287	11	3	decreased
6	1289	1300	1	1	unchanged
6	1302	1328	10	0	decreased
6	1330	1353	0	3	unchanged
6	1355	1394	14	18	unchanged
6	1396	1418	3	5	unchanged
6	1420	1432	0	3	unchanged
6	1434	1451	1	3	unchanged
6	1453	1480	0	14	increased
6	1482	1489	0	2	unchanged
6	1491	1508	2	3	unchanged
6	1510	1520	5	1	unchanged
6	1522	1555	14	1	decreased
6	1557	1573	3	1	unchanged
6	1575	1579	1	0	unchanged
6	1581	1592	6	0	decreased
6	1594	1606	3	0	unchanged
6	1608	1648	2	8	increased
6	1650	1663	3	1	unchanged
6	1665	1705	20	1	decreased
6	1707	1720	4	0	unchanged
6	1722	1730	1	0	unchanged
6	1732	1742	3	0	unchanged
6	1744	1762	8	0	decreased
6	1764	1772	6	0	decreased
6	1774	1787	2	0	unchanged
6	1789	1817	7	1	decreased
6	1819	1827	4	0	unchanged
6	1829	1835	3	0	unchanged
6	1837	1849	5	0	unchanged
6	1851	1862	9	0	decreased
6	1864	1882	8	0	decreased
6	1884	1900	4	0	unchanged
6	1902	1934	11	3	decreased
6	1936	1963	0	22	increased
6	1965	1993	5	3	unchanged
6	1995	2053	5	36	increased
6	2055	2064	1	0	unchanged
6	2066	2085	3	3	unchanged
6	2087	2101	2	0	unchanged
6	2103	2107	0	0	unchanged
6	2109	2128	4	0	unchanged
6	2130	2143	10	0	decreased
6	2145	2158	5	0	unchanged
6	2160	2177	5	0	unchanged
6	2179	2217	27	1	decreased
6	2219	2269	10	3	decreased
6	2271	2296	6	0	decreased
6	2298	2318	0	8	increased
6	2320	2338	0	2	unchanged
6	2340	2351	1	0	unchanged
6	2353	2367	1	2	unchanged
6	2369	2379	1	0	unchanged
6	2381	2386	0	1	unchanged
6	2388	2437	9	11	unchanged
6	2439	2473	3	4	unchanged
6	2475	2492	0	2	unchanged
6	2494	2535	2	13	increased
6	2537	2606	1	51	increased
6	2608	2626	3	1	unchanged
6	2628	2647	3	1	unchanged
6	2649	2669	4	0	unchanged
6	2671	2679	3	1	unchanged
6	2681	2690	1	0	unchanged
6	2692	2756	15	5	decreased
6	2758	2792	2	9	increased
6	2794	2809	0	0	unchanged
6	2811	2823	9	1	decreased
6	2825	2837	7	0	decreased
6	2839	2861	10	1	decreased
6	2863	2867	0	0	unchanged
6	2869	2903	0	13	increased
6	3198	3214	1	2	unchanged
6	3216	3229	0	1	unchanged
6	3231	3249	0	4	unchanged
6	3251	3364	3	45	increased
6	3366	3379	1	3	unchanged
6	3381	3467	3	28	increased
6	3469	3526	7	13	unchanged
6	3528	3546	0	4	unchanged
6	3548	3569	1	0	unchanged
6	3571	3588	1	0	unchanged
6	3590	3603	1	5	unchanged
6	3605	3611	2	0	unchanged
6	3613	3642	2	1	unchanged
6	3644	3654	2	0	unchanged
6	3656	3664	1	0	unchanged
6	3666	3707	11	2	decreased
6	3709	3717	5	0	unchanged
6	3719	3797	51	6	decreased
6	3799	3827	9	0	decreased
6	3829	3868	0	19	increased
6	3870	3910	2	3	unchanged
6	3912	3978	5	32	increased
6	3980	3984	1	0	unchanged
6	3986	4030	2	16	increased
6	4032	4039	0	0	unchanged
6	4041	4124	32	17	unchanged
6	4126	4146	3	1	unchanged
6	4148	4190	5	2	unchanged
6	4192	4196	4	0	unchanged
6	4198	4213	2	0	unchanged
6	4215	4246	1	10	increased
6	4248	4303	6	17	increased
6	4305	4319	8	0	decreased
6	4321	4386	1	65	increased
6	4388	4425	11	1	decreased
6	4427	4483	9	19	increased
6	4485	4504	4	6	unchanged
6	4506	4519	0	4	unchanged
6	4521	4524	0	0	unchanged
6	4526	4565	12	3	decreased
6	4567	4580	0	3	unchanged
6	4582	4703	4	59	increased
6	4705	4849	8	47	increased
6	4851	4876	0	7	unchanged
6	4878	4894	0	0	unchanged
6	4896	4987	8	51	increased
6	4989	5014	2	2	unchanged
6	5016	5025	0	0	unchanged
6	5027	5057	22	0	decreased
6	5059	5091	5	3	unchanged
6	5093	5127	5	4	unchanged
6	5129	5163	5	8	unchanged
6	5165	5181	0	1	unchanged
6	5183	5249	2	26	increased
6	5251	5269	3	0	unchanged
6	5271	5292	2	2	unchanged
6	5294	5339	27	1	decreased
6	5341	5351	0	0	unchanged
6	5353	5366	0	4	unchanged
6	5368	5410	8	4	unchanged
6	5412	5442	7	4	unchanged
6	5444	5472	11	0	decreased
6	5474	5488	2	1	unchanged
6	5490	5521	4	5	unchanged
6	5523	5539	0	2	unchanged
6	5541	5567	4	0	unchanged
6	5569	5579	0	0	unchanged
6	5581	5599	15	0	decreased
6	5601	5621	17	0	decreased
6	5623	5631	4	0	unchanged
6	5633	5672	14	2	decreased
6	5674	5714	30	0	decreased
6	5716	5821	9	43	increased
6	5823	5853	16	1	decreased
6	5855	5910	7	23	increased
6	5912	5927	0	3	unchanged
6	5929	5962	7	0	decreased
6	5964	5970	0	2	unchanged
6	5972	6067	14	35	increased
6	6069	6081	0	1	unchanged
6	6083	6133	14	8	unchanged
6	6135	6140	0	0	unchanged
6	6142	6184	1	16	increased
6	6186	6201	0	7	unchanged
6	6203	6258	1	25	increased
6	6260	6281	8	0	decreased
6	6283	6305	1	5	unchanged
6	6307	6315	10	0	decreased
6	6317	6380	15	10	unchanged
6	6382	6394	5	0	unchanged
6	6396	6443	33	1	decreased
6	6445	6453	1	0	unchanged
6	6455	6491	11	0	decreased
6	6493	6504	5	0	unchanged
6	6506	6517	3	0	unchanged
6	6519	6559	9	1	decreased
6	6561	6574	5	0	unchanged
6	6576	6597	3	5	unchanged
6	6599	6610	2	0	unchanged
6	6612	6631	8	0	decreased
6	6633	6642	1	0	unchanged
6	6644	6655	0	5	unchanged
6	6657	6694	2	10	increased
6	6696	6713	1	0	unchanged
6	6715	6721	0	0	unchanged
6	6723	6766	22	1	decreased
6	6768	6787	6	0	decreased
6	6789	6832	15	2	decreased
6	6834	6842	0	2	unchanged
6	6844	6858	3	0	unchanged
6	6860	6900	6	8	unchanged
6	6902	6916	1	2	unchanged
6	6918	6945	7	2	decreased
6	6947	6954	3	0	unchanged
6	6956	6972	8	0	decreased
6	6974	6982	3	1	unchanged
6	6984	7018	20	2	decreased
6	7020	7043	4	0	unchanged
6	7045	7065	8	2	decreased
6	7067	7100	9	1	decreased
6	7102	7123	2	1	unchanged
6	7125	7137	3	0	unchanged
6	7139	7192	18	3	decreased
6	7194	7219	12	0	decreased
6	7221	7242	9	0	decreased
6	7244	7278	16	0	decreased
6	7280	7303	3	2	unchanged
6	7305	7310	0	0	unchanged
6	7312	7356	4	16	increased
6	7358	7384	6	3	unchanged
6	7386	7427	7	2	decreased
6	7429	7442	4	0	unchanged
6	7444	7467	10	0	decreased
6	7469	7494	10	0	decreased
6	7496	7502	5	0	unchanged
6	7504	7512	2	0	unchanged
6	7514	7534	0	1	unchanged
6	7536	7558	1	5	unchanged
6	7560	7586	18	0	decreased
6	7588	7634	14	9	unchanged
6	7636	7652	1	0	unchanged
6	7654	7665	0	2	unchanged
6	7667	7723	3	30	increased
6	7725	7735	1	0	unchanged
6	7737	7749	1	1	unchanged
6	7751	7757	1	0	unchanged
6	7759	7781	10	0	decreased
6	7783	7849	3	22	increased
6	7851	7855	0	0	unchanged
6	7857	7885	7	0	decreased
6	7887	7902	2	1	unchanged
6	7904	7929	22	1	decreased
6	7931	7955	11	0	decreased
6	7957	7971	8	0	decreased
6	7973	8005	1	9	increased
6	8007	8024	4	0	unchanged
6	8026	8050	0	14	increased
6	8052	8090	1	9	increased
6	8092	8160	4	77	increased
6	8162	8190	0	16	increased
6	8192	8221	2	8	increased
6	8223	8274	1	36	increased
6	8276	8285	0	4	unchanged
6	8287	8290	0	2	unchanged
6	8292	8314	0	14	increased
6	8316	8331	1	12	increased
6	8333	8359	6	5	unchanged
6	8361	8373	0	4	unchanged
6	8375	8415	2	40	increased
6	8417	8429	1	3	unchanged
6	8431	8464	2	47	increased
6	8466	8480	2	1	unchanged
6	8482	8507	9	2	decreased
7	50	60	3	0	unchanged
7	62	76	4	1	unchanged
7	78	122	26	3	decreased
[truncated: 2,779 more rows]
