# Supplementary material for: The loss of heterochromatin is associated with multiscale three-dimensional genome reorganization and aberrant transcription during cellular senescence
Source: HighWire-hosted journal article supplement (doi:10.1101/gr.275235.121), 2021-06-17
Supplement: Supplemental_Table_S6.xlsx [file Supplemental_Table_S6.xlsx]

## Sheet: loops across 4 states
Table S6: Loops called by HICCUPS for each cell state.
samples	chr1	x1	x2	chr2	y1	y2	name	score	strand1	strand2	color	observed	expectedBL	expectedDonut	expectedH	expectedV	fdrBL	fdrDonut	fdrH	fdrV	numCollapsed	centroid1	centroid2	radius
G	10	104680000	104700000	10	104800000	104820000	.	.	.	.	0,255,255	129	53.6536	47.1293	58.8874	56.0987	4.76716e-11	2.86176e-17	1.33033e-10	2.14042e-10	5	104682000	104814000	25298
G	10	103600000	103620000	10	103760000	103780000	.	.	.	.	0,255,255	126	50.5105	43.977	48.6472	48.5092	3.03311e-10	3.87292e-16	9.2177e-16	7.43432e-16	5	103622000	103770000	34409
G	10	91180000	91200000	10	91300000	91320000	.	.	.	.	0,255,255	123	46.8383	43.0548	52.082	46.9888	7.53726e-15	5.0256e-15	6.83859e-09	8.03914e-15	5	91198000	91314000	25298
G	10	28540000	28560000	10	28660000	28680000	.	.	.	.	0,255,255	121	39.2403	32.1611	37.672	36.3112	3.1028e-14	4.60664e-21	4.61531e-21	9.26507e-21	3	28556666	28663333	14908
G	10	103980000	104000000	10	104100000	104120000	.	.	.	.	0,255,255	117	51.9587	54.4775	57.1278	66.1515	6.52127e-08	3.01035e-07	2.02204e-07	0.00125646	6	103973333	104143333	50881
G	10	90780000	90800000	10	90960000	90980000	.	.	.	.	0,255,255	117	34.248	28.4091	36.8111	40.0209	3.26155e-19	4.36355e-27	2.22833e-19	7.78431e-13	6	90790000	90973333	30732
G	10	54060000	54080000	10	54320000	54340000	.	.	.	.	0,255,255	117	26.1429	23.0743	40.9948	24.5957	1.51622e-26	2.2401e-35	1.02951e-12	1.02449e-26	2	54070000	54320000	10000
G	10	71980000	72000000	10	72100000	72120000	.	.	.	.	0,255,255	114	41.8147	42.0724	48.7835	49.3889	5.37005e-12	5.25151e-12	8.33254e-12	1.01879e-06	3	71990000	72110000	20000
G	10	30680000	30700000	10	30800000	30820000	.	.	.	.	0,255,255	114	44.5513	50.031	56.745	51.7891	5.37005e-12	1.47728e-06	1.01483e-06	1.01879e-06	7	30698571	30835714	35341
G	10	15460000	15480000	10	15760000	15780000	.	.	.	.	0,255,255	113	23.8933	20.8917	31.9561	26.1504	1.73346e-32	6.76941e-33	1.0454e-17	9.39272e-25	5	15466000	15774000	33941
G	10	118540000	118560000	10	118920000	118940000	.	.	.	.	0,255,255	110	18.9989	18.2945	19.7351	27.1106	1.3936e-38	1.70279e-39	1.03193e-30	2.65381e-23	8	118575000	118927500	40389
G	10	70980000	71000000	10	71140000	71160000	.	.	.	.	0,255,255	108	37.0933	31.4608	34.4862	40.2088	1.43099e-15	9.16199e-16	1.17083e-15	6.48716e-10	6	70993333	71153333	23571
G	10	75280000	75300000	10	75380000	75400000	.	.	.	.	0,255,255	106	41.4202	38.4789	44.7572	41.3802	1.58807e-09	5.51904e-15	2.65458e-09	2.60672e-09	4	75280000	75405000	26926
G	10	112060000	112080000	10	112300000	112320000	.	.	.	.	0,255,255	102	37.6422	25.7535	29.1145	30.4604	2.40622e-13	1.25965e-19	2.31884e-19	2.36596e-19	7	112087142	112298571	36589
G	10	78920000	78940000	10	79400000	79420000	.	.	.	.	0,255,255	102	23.6713	17.7476	28.865	25.6999	3.44058e-26	5.4082e-34	2.31884e-19	2.36596e-19	10	78952000	79406000	67676
G	10	35400000	35420000	10	35500000	35520000	.	.	.	.	0,255,255	101	39.5171	29.9224	35.7395	32.0071	4.16958e-08	3.7057e-19	5.72657e-13	6.06727e-13	1	35410000	35510000	0
G	10	105500000	105520000	10	105600000	105620000	.	.	.	.	0,255,255	100	49.4273	44.4913	40.7067	57.4408	0.000276692	1.03939e-07	1.36433e-07	0.000777344	5	105482000	105622000	30463
G	10	94840000	94860000	10	95040000	95060000	.	.	.	.	0,255,255	100	36.182	30.4816	37.0572	34.6155	1.21908e-12	1.06022e-18	1.30618e-12	1.34961e-12	6	94846666	95053333	23571
G	10	90580000	90600000	10	90680000	90700000	.	.	.	.	0,255,255	100	45.0785	38.4572	43.1	41.814	7.75164e-08	9.84283e-13	1.36433e-07	1.42736e-07	2	90590000	90700000	10000
G	10	99220000	99240000	10	99320000	99340000	.	.	.	.	0,255,255	99	48.115	49.7295	54.7834	46.9494	1.36224e-07	0.00136108	0.00106525	2.59275e-07	2	99230000	99350000	20000
G	10	70540000	70560000	10	70640000	70660000	.	.	.	.	0,255,255	99	49.717	42.432	43.1666	49.0151	0.000411088	1.97913e-07	2.54979e-07	0.0011569	2	70540000	70660000	14142
G	10	16880000	16900000	10	17280000	17300000	.	.	.	.	0,255,255	99	24.9359	17.7251	29.1748	25.9853	6.64106e-18	6.44779e-32	5.93976e-18	5.91264e-18	10	16898000	17290000	37736
G	10	5480000	5500000	10	5660000	5680000	.	.	.	.	0,255,255	99	33.4651	24.5532	38.0735	25.319	2.83451e-12	1.00715e-24	2.9516e-12	5.91264e-18	5	5498000	5654000	25298
G	10	104480000	104500000	10	104580000	104600000	.	.	.	.	0,255,255	98	54.5523	48.7863	58.7401	47.4398	0.000607477	3.59332e-07	0.00158095	4.5895e-07	2	104490000	104610000	20000
G	10	89300000	89320000	10	89400000	89420000	.	.	.	.	0,255,255	98	45.2464	44.8228	52.0084	43.1391	2.50038e-07	3.59332e-07	0.00158095	4.5895e-07	3	89296666	89416666	14907
G	10	28940000	28960000	10	29580000	29600000	.	.	.	.	0,255,255	98	21.7627	19.5572	33.2564	23.3229	6.6024e-24	2.84039e-31	6.51037e-12	9.34025e-24	9	28947777	29592222	37842
G	10	30280000	30300000	10	30520000	30540000	.	.	.	.	0,255,255	97	33.7864	30.7595	36.923	39.6479	1.43368e-11	2.61048e-17	1.46903e-11	7.8504e-07	3	30316666	30523333	27487
G	10	54060000	54080000	10	54240000	54260000	.	.	.	.	0,255,255	95	35.6014	30.9387	45.6437	31.655	6.73088e-11	5.48368e-11	2.57362e-06	7.94804e-11	2	54070000	54260000	10000
G	10	91020000	91040000	10	91140000	91160000	.	.	.	.	0,255,255	92	41.2497	34.8177	45.7708	40.1578	7.27053e-06	5.80525e-10	1.36408e-05	1.25751e-05	5	91018000	91146000	25298
G	10	79000000	79020000	10	79400000	79420000	.	.	.	.	0,255,255	92	26.2149	27.828	32.4066	42.246	7.88754e-15	4.14384e-15	7.80263e-10	1.25751e-05	1	79010000	79410000	0
G	10	13700000	13720000	10	13800000	13820000	.	.	.	.	0,255,255	92	40.1682	33.5826	33.4315	45.462	7.27053e-06	5.80525e-10	7.80263e-10	1.25751e-05	2	13700000	13810000	10000
G	10	21560000	21580000	10	21760000	21780000	.	.	.	.	0,255,255	91	41.8059	34.4486	48.617	37.4107	1.21658e-05	1.24945e-09	2.26677e-05	1.83835e-09	3	21570000	21796666	33334
G	10	14540000	14560000	10	14860000	14880000	.	.	.	.	0,255,255	91	25.8069	21.3377	25.8554	32.1773	2.09691e-14	2.15772e-20	1.83454e-14	1.83835e-09	6	14586666	14870000	66417
G	10	112140000	112160000	10	112240000	112260000	.	.	.	.	0,255,255	88	35.7189	43.9053	42.7184	45.3567	1.38921e-08	8.3402e-05	0.000102007	9.58501e-05	1	112150000	112250000	0
G	10	102080000	102100000	10	102180000	102200000	.	.	.	.	0,255,255	88	41.1338	33.2583	39.2485	34.2146	5.4609e-05	1.11855e-08	0.000102007	1.67142e-08	2	102080000	102180000	14142
G	10	95120000	95140000	10	95240000	95260000	.	.	.	.	0,255,255	88	47.0334	34.7366	32.2795	48.5419	5.4609e-05	1.11855e-08	1.56352e-08	9.58501e-05	1	95130000	95250000	0
G	10	79600000	79620000	10	79720000	79740000	.	.	.	.	0,255,255	87	38.7491	38.5129	43.685	38.4065	2.75055e-08	2.25838e-08	0.000162833	3.36668e-08	7	79604285	79747142	30905
G	10	79160000	79180000	10	79380000	79400000	.	.	.	.	0,255,255	87	28.2918	30.7412	33.0355	45.0783	9.00033e-13	5.22644e-13	3.11128e-08	0.000152161	2	79160000	79400000	14142
G	10	96940000	96960000	10	97120000	97140000	.	.	.	.	0,255,255	86	27.1668	23.8815	25.0954	33.1698	2.20258e-12	7.65188e-18	2.03403e-12	6.6643e-08	3	96950000	97123333	24037
G	10	70300000	70320000	10	70480000	70500000	.	.	.	.	0,255,255	86	37.2462	35.4694	39.4048	39.9315	5.49521e-08	4.42724e-08	0.000254854	0.000236755	2	70290000	70490000	20000
G	10	61960000	61980000	10	62180000	62200000	.	.	.	.	0,255,255	86	28.0581	27.4177	27.3021	40.1915	2.20258e-12	1.31348e-12	2.03403e-12	0.000236755	2	61980000	62200000	14142
G	10	134260000	134280000	10	134440000	134460000	.	.	.	.	0,255,255	85	23.793	22.1241	29.0773	31.7021	4.37464e-17	2.24048e-17	4.86217e-12	1.32769e-07	2	134280000	134450000	10000
G	10	97460000	97480000	10	97600000	97620000	.	.	.	.	0,255,255	85	24.2584	26.387	27.8577	33.9163	4.37464e-17	3.27248e-12	4.86217e-12	1.32769e-07	5	97466000	97598000	25298
G	10	104480000	104500000	10	104660000	104680000	.	.	.	.	0,255,255	84	29.16	26.6521	40.1836	24.264	1.33111e-11	7.96484e-12	0.00063773	1.44585e-16	3	104496666	104656666	14907
G	10	102100000	102120000	10	102260000	102280000	.	.	.	.	0,255,255	84	33.7919	36.101	44.1713	46.0427	2.14398e-07	1.77849e-07	0.00063773	0.000611679	3	102096666	102276666	27487
G	10	121500000	121520000	10	121600000	121620000	.	.	.	.	0,255,255	83	40.306	36.4288	37.7908	43.5253	0.000529795	3.49703e-07	4.71975e-07	0.000938999	1	121510000	121610000	0
G	10	24280000	24300000	10	24800000	24820000	.	.	.	.	0,255,255	83	10.2428	8.88021	12.5484	13.4097	1.06437e-33	0	4.47585e-27	1.49272e-27	4	24285000	24815000	35355
G	10	12300000	12320000	10	12740000	12760000	.	.	.	.	0,255,255	83	24.091	21.6414	28.4863	26.7159	4.22913e-16	2.18239e-16	2.95303e-11	3.38587e-11	5	12298000	12750000	28000
G	10	101600000	101620000	10	101800000	101820000	.	.	.	.	0,255,255	82	32.1833	28.534	33.8052	30.5327	7.82539e-07	4.71972e-11	9.01319e-07	8.24167e-11	1	101610000	101810000	0
G	10	75880000	75900000	10	75980000	76000000	.	.	.	.	0,255,255	82	45.707	28.684	36.5966	37.776	0.000832754	4.71972e-11	9.01319e-07	9.45706e-07	1	75890000	75990000	0
G	10	71540000	71560000	10	71660000	71680000	.	.	.	.	0,255,255	82	34.0792	30.4032	28.6258	32.4956	7.82539e-07	4.71972e-11	7.0427e-11	9.45706e-07	2	71550000	71680000	10000
G	10	71160000	71180000	10	71260000	71280000	.	.	.	.	0,255,255	82	37.3975	27.7321	31.075	33.5103	7.82539e-07	4.71972e-11	9.01319e-07	9.45706e-07	2	71180000	71280000	14142
G	10	28960000	28980000	10	29120000	29140000	.	.	.	.	0,255,255	82	40.4855	35.1295	37.8223	36.9206	0.000832754	6.60112e-07	9.01319e-07	9.45706e-07	1	28970000	29130000	0
G	10	17040000	17060000	10	17260000	17280000	.	.	.	.	0,255,255	81	27.5868	25.9357	25.9469	40.8238	1.79317e-10	1.10895e-10	1.69838e-10	0.0022373	1	17050000	17270000	0
G	10	103920000	103940000	10	104100000	104120000	.	.	.	.	0,255,255	80	32.6585	31.8711	35.7888	39.1085	2.7694e-06	2.39752e-06	3.26017e-06	0.00338363	1	103930000	104110000	0
G	10	59920000	59940000	10	60040000	60060000	.	.	.	.	0,255,255	80	32.6819	25.3554	28.9316	26.5348	2.7694e-06	2.63615e-10	3.93559e-10	4.52278e-10	3	59936666	60043333	14908
G	10	105800000	105820000	10	105960000	105980000	.	.	.	.	0,255,255	79	25.3249	29.5894	40.1976	30.4601	9.67665e-10	6.20432e-10	0.00535045	1.04225e-09	2	105800000	105970000	10000
G	10	97000000	97020000	10	97120000	97140000	.	.	.	.	0,255,255	79	36.8216	37.4557	35.2138	46.5809	5.05759e-06	4.39614e-06	6.01111e-06	0.00503334	2	97010000	97120000	10000
G	10	93820000	93840000	10	94180000	94200000	.	.	.	.	0,255,255	79	23.4924	21.4221	30.5169	27.4108	3.02572e-14	1.69664e-14	9.26486e-10	1.04225e-09	6	93840000	94186666	34318
G	10	90440000	90460000	10	90560000	90580000	.	.	.	.	0,255,255	79	37.675	37.8226	39.1741	40.5269	5.05759e-06	4.39614e-06	0.00535045	0.00503334	1	90450000	90570000	0
G	10	71260000	71280000	10	71380000	71400000	.	.	.	.	0,255,255	79	35.6325	32.592	34.3674	37.1991	5.05759e-06	4.39614e-06	6.01111e-06	6.24902e-06	3	71283333	71396666	14908
G	10	116300000	116320000	10	116460000	116480000	.	.	.	.	0,255,255	78	31.4895	33.4619	48.5025	39.3176	8.97671e-06	8.06024e-06	0.00790725	0.00749512	1	116310000	116470000	0
G	10	76000000	76020000	10	76840000	76860000	.	.	.	.	0,255,255	77	18.5665	14.8236	23.6821	20.2722	3.10723e-18	6.46841e-24	2.45276e-13	2.65339e-13	8	76015000	76847500	57717
G	10	113940000	113960000	10	114060000	114080000	.	.	.	.	0,255,255	76	29.7891	27.5233	33.4457	33.786	1.07891e-08	7.13798e-09	3.49341e-05	3.48203e-05	2	113940000	114070000	10000
G	10	111900000	111920000	10	112020000	112040000	.	.	.	.	0,255,255	76	29.6427	28.6074	34.8836	36.2749	1.07891e-08	7.13798e-09	3.49341e-05	3.48203e-05	3	111896666	112036666	14907
G	10	111640000	111660000	10	111880000	111900000	.	.	.	.	0,255,255	76	32.7398	24.0667	35.1131	25.9573	2.86164e-05	3.91725e-13	3.49341e-05	1.18297e-08	2	111650000	111880000	10000
G	10	88460000	88480000	10	88660000	88680000	.	.	.	.	0,255,255	76	32.6929	25.3784	27.1001	31.7208	2.86164e-05	7.13798e-09	1.05105e-08	3.48203e-05	4	88460000	88660000	14142
G	10	28960000	28980000	10	29400000	29420000	.	.	.	.	0,255,255	76	24.5897	24.9374	40.1441	24.1414	6.3636e-13	7.13798e-09	0.0162521	7.13829e-13	1	28970000	29410000	0
G	10	15480000	15500000	10	15700000	15720000	.	.	.	.	0,255,255	76	25.9941	28.5265	47.9585	25.6287	1.07891e-08	7.13798e-09	0.0162521	1.18297e-08	1	15490000	15710000	0
G	10	11820000	11840000	10	12020000	12040000	.	.	.	.	0,255,255	76	34.1854	24.7898	32.0204	25.6964	2.86164e-05	7.13798e-09	3.49341e-05	1.18297e-08	2	11840000	12030000	10000
G	10	73700000	73720000	10	73800000	73820000	.	.	.	.	0,255,255	75	35.0774	32.8438	37.3683	33.9985	5.06196e-05	4.58973e-05	6.19748e-05	6.1964e-05	2	73700000	73810000	10000
G	10	27020000	27040000	10	27140000	27160000	.	.	.	.	0,255,255	75	31.9888	29.3889	30.8978	34.7559	5.06196e-05	1.59865e-08	2.28366e-08	6.1964e-05	4	27015000	27165000	25495
G	10	127660000	127680000	10	128180000	128200000	.	.	.	.	0,255,255	74	15.0701	15.7253	24.1334	16.7723	1.57397e-21	5.06105e-17	5.10582e-12	1.81516e-16	3	127650000	128190000	20000
G	10	81120000	81140000	10	81220000	81240000	.	.	.	.	0,255,255	73	28.9448	32.9119	34.4341	40.2536	1.10855e-07	0.000137717	0.000186477	0.0425497	2	81130000	81250000	20000
G	10	120940000	120960000	10	121200000	121220000	.	.	.	.	0,255,255	72	27.3194	25.7919	30.461	26.8857	2.3085e-07	1.59911e-07	2.3245e-07	2.52549e-07	7	120927142	121224285	45176
G	10	118440000	118460000	10	118540000	118560000	.	.	.	.	0,255,255	72	33.2383	28.2386	28.7519	31.6543	0.000252126	1.59911e-07	2.3245e-07	0.000317573	2	118440000	118550000	10000
G	10	97220000	97240000	10	97340000	97360000	.	.	.	.	0,255,255	72	31.2113	34.6737	31.605	41.0039	0.000252126	0.000235062	0.000317699	0.0577178	4	97195000	97355000	35355
G	10	92660000	92680000	10	93000000	93020000	.	.	.	.	0,255,255	72	18.11	16.6789	22.5825	24.4152	1.30239e-15	5.79882e-16	3.55031e-11	3.81044e-11	6	92660000	93013333	38006
G	10	125740000	125760000	10	126060000	126080000	.	.	.	.	0,255,255	71	17.9157	15.4823	21.4135	23.7374	3.94962e-15	2.98864e-20	9.07043e-11	9.53189e-11	5	125758000	126086000	25298
G	10	116300000	116320000	10	116540000	116560000	.	.	.	.	0,255,255	71	25.3756	24.8649	32.5167	27.4107	4.83966e-07	3.34276e-07	0.000535527	5.28965e-07	3	116310000	116550000	20000
G	10	74120000	74140000	10	74580000	74600000	.	.	.	.	0,255,255	71	15.0345	14.3492	24.5263	17.0767	1.00763e-19	2.98864e-20	9.07043e-11	6.09826e-15	3	74130000	74590000	20000
G	10	49760000	49780000	10	49860000	49880000	.	.	.	.	0,255,255	71	39.0331	26.4252	31.9744	30.3434	0.0455004	3.34276e-07	0.000535527	5.28965e-07	2	49760000	49870000	10000
G	10	92760000	92780000	10	93000000	93020000	.	.	.	.	0,255,255	70	24.097	25.7575	22.1334	38.0198	2.14992e-10	6.80942e-07	2.31133e-10	0.000864534	1	92770000	93010000	0
G	10	86120000	86140000	10	86280000	86300000	.	.	.	.	0,255,255	70	27.3794	21.6218	20.2413	30.0081	9.75859e-07	1.43986e-10	2.31133e-10	1.07425e-06	1	86130000	86290000	0
G	10	26620000	26640000	10	26840000	26860000	.	.	.	.	0,255,255	70	18.814	17.926	22.8837	19.6921	1.24185e-14	5.94143e-15	2.31133e-10	2.34402e-10	4	26625000	26835000	25495
G	10	11560000	11580000	10	11760000	11780000	.	.	.	.	0,255,255	70	18.3385	17.536	23.246	21.0494	1.24185e-14	5.94143e-15	2.31133e-10	2.34402e-10	4	11560000	11780000	14142
G	10	127660000	127680000	10	128060000	128080000	.	.	.	.	0,255,255	69	18.4502	20.6496	33.2282	24.6889	3.75382e-14	3.65491e-10	0.00142684	2.14519e-06	1	127670000	128070000	0
G	10	14000000	14020000	10	14120000	14140000	.	.	.	.	0,255,255	69	26.8408	29.1682	26.6138	30.6855	1.99022e-06	1.40823e-06	1.99939e-06	2.14519e-06	1	14010000	14130000	0
G	10	93840000	93860000	10	94040000	94060000	.	.	.	.	0,255,255	68	27.5526	31.5203	34.9675	32.7401	3.92347e-06	0.00170961	0.00227662	0.0022226	1	93850000	94050000	0
G	10	89280000	89300000	10	89480000	89500000	.	.	.	.	0,255,255	68	25.808	21.9288	34.0428	21.4583	3.92347e-06	9.12319e-10	0.00227662	1.44799e-09	2	89290000	89500000	10000
G	10	72320000	72340000	10	72500000	72520000	.	.	.	.	0,255,255	68	23.2558	25.6912	31.5328	33.5757	1.30827e-09	2.77938e-06	0.00227662	0.0022226	4	72315000	72540000	39051
G	10	63800000	63820000	10	64000000	64020000	.	.	.	.	0,255,255	67	35.3443	27.4255	23.7417	35.1721	0.00268268	5.41443e-06	3.33101e-09	0.00349546	2	63820000	64010000	10000
G	10	115560000	115580000	10	115860000	115880000	.	.	.	.	0,255,255	66	20.0831	18.8754	19.9072	27.2805	7.77681e-09	5.53564e-13	8.13161e-09	1.61461e-05	4	115560000	115870000	22361
G	10	111640000	111660000	10	111760000	111780000	.	.	.	.	0,255,255	66	31.2792	26.0274	30.4639	23.9109	0.00411205	1.06205e-05	1.50762e-05	8.5386e-09	1	111650000	111770000	0
G	10	95840000	95860000	10	96060000	96080000	.	.	.	.	0,255,255	66	26.5692	29.1955	34.8577	35.0396	1.47347e-05	1.06205e-05	0.00560357	0.00542433	1	95850000	96070000	0
G	10	94440000	94460000	10	94580000	94600000	.	.	.	.	0,255,255	66	29.3178	29.6899	36.3932	32.2288	1.47347e-05	1.06205e-05	0.00560357	0.00542433	1	94450000	94590000	0
G	10	79260000	79280000	10	79380000	79400000	.	.	.	.	0,255,255	66	32.8915	30.2461	31.7601	34.2271	0.00411205	1.06205e-05	0.00560357	0.00542433	1	79270000	79390000	0
G	10	75640000	75660000	10	75840000	75860000	.	.	.	.	0,255,255	66	33.0783	28.1729	32.7783	37.1272	0.00411205	1.06205e-05	0.00560357	0.00542433	3	75650000	75850000	20000
G	10	64960000	64980000	10	65460000	65480000	.	.	.	.	0,255,255	66	21.6266	17.4345	28.9342	19.3586	7.77681e-09	5.53564e-13	1.50762e-05	1.63378e-12	6	64963333	65476666	47141
G	10	14980000	15000000	10	15140000	15160000	.	.	.	.	0,255,255	66	35.2046	28.9746	26.5666	35.3689	0.00411205	1.06205e-05	1.50762e-05	0.00542433	1	14990000	15150000	0
G	10	52820000	52840000	10	53180000	53200000	.	.	.	.	0,255,255	65	22.9252	21.235	29.4553	25.3832	1.87314e-08	1.32405e-08	2.90589e-05	3.06207e-05	5	52818000	53178000	48662
G	10	24920000	24940000	10	25280000	25300000	.	.	.	.	0,255,255	65	19.463	18.3879	25.7213	21.6717	3.2375e-12	1.69685e-12	2.90589e-05	2.0316e-08	5	24914000	25298000	52154
G	10	125340000	125360000	10	125720000	125740000	.	.	.	.	0,255,255	64	15.8168	11.0144	15.4146	16.7088	9.17761e-12	2.08614e-20	1.31745e-15	1.28353e-11	7	125355714	125718571	35341
G	10	95680000	95700000	10	96080000	96100000	.	.	.	.	0,255,255	64	21.9655	21.6283	28.3661	26.8154	4.21573e-08	3.04283e-08	5.40182e-05	5.7447e-05	3	95676666	96083333	14908
G	10	89600000	89620000	10	90300000	90320000	.	.	.	.	0,255,255	64	19.6418	14.4261	24.8945	16.2868	4.21573e-08	3.24659e-16	5.40182e-05	1.28353e-11	3	89610000	90310000	20000
G	10	76020000	76040000	10	76160000	76180000	.	.	.	.	0,255,255	64	28.1947	24.2835	27.6728	26.1644	5.18273e-05	3.04283e-08	5.40182e-05	5.7447e-05	1	76030000	76170000	0
G	10	34960000	34980000	10	35260000	35280000	.	.	.	.	0,255,255	64	19.9166	16.9338	24.7064	21.1578	4.21573e-08	4.99846e-12	5.40182e-05	4.63115e-08	5	34970000	35294000	40200
G	10	60280000	60300000	10	60500000	60520000	.	.	.	.	0,255,255	63	18.6802	22.8327	27.3233	28.1895	2.60403e-11	7.08708e-08	9.95566e-05	0.000105485	1	60290000	60510000	0
G	10	31620000	31640000	10	31760000	31780000	.	.	.	.	0,255,255	63	29.8059	27.452	27.9778	26.1784	9.47612e-05	7.2824e-05	9.95566e-05	0.000105485	1	31630000	31770000	0
G	10	23600000	23620000	10	23800000	23820000	.	.	.	.	0,255,255	63	23.1987	24.5256	27.8354	24.3297	9.58217e-08	7.08708e-08	9.95566e-05	1.06197e-07	4	23595000	23820000	26926
G	10	124040000	124060000	10	124180000	124200000	.	.	.	.	0,255,255	62	22.3802	23.5697	29.0814	29.772	2.14684e-07	1.63532e-07	0.000181994	0.000191484	4	124070000	124200000	22361
G	10	81320000	81340000	10	81680000	81700000	.	.	.	.	0,255,255	62	12.9528	16.2094	25.9821	18.1174	1.43602e-14	4.12586e-11	0.000181994	1.05134e-10	6	81333333	81696666	37268
G	10	126220000	126240000	10	126420000	126440000	.	.	.	.	0,255,255	61	22.988	20.0887	25.5393	22.6552	4.82819e-07	3.62896e-07	0.000323304	5.40841e-07	3	126216666	126436666	14907
G	10	76020000	76040000	10	76760000	76780000	.	.	.	.	0,255,255	61	16.6867	18.3108	29.2797	18.4257	2.06693e-10	1.18825e-10	0.000323304	2.93325e-10	2	76030000	76780000	10000
G	10	31060000	31080000	10	31760000	31780000	.	.	.	.	0,255,255	61	18.8769	20.9885	29.0924	23.4153	2.06693e-10	3.62896e-07	0.000323304	5.40841e-07	1	31070000	31770000	0
G	10	13840000	13860000	10	14140000	14160000	.	.	.	.	0,255,255	61	25.0976	22.9853	32.3651	29.4912	0.000303676	3.62896e-07	0.039275	0.000343992	4	13835000	14135000	25495
G	10	7560000	7580000	10	7720000	7740000	.	.	.	.	0,255,255	61	24.5305	20.5722	23.7446	23.8308	4.82819e-07	3.62896e-07	5.36112e-07	5.40841e-07	4	7565000	7755000	25495
G	10	94660000	94680000	10	94800000	94820000	.	.	.	.	0,255,255	60	32.6386	28.8435	32.1584	31.9923	0.0400052	0.000422253	0.0554163	0.0551174	2	94660000	94810000	10000
G	10	62200000	62220000	10	62400000	62420000	.	.	.	.	0,255,255	60	26.6644	21.1315	23.6555	23.8629	0.000530416	8.05338e-07	1.17483e-06	1.16808e-06	2	62210000	62400000	10000
G	10	32120000	32140000	10	32300000	32320000	.	.	.	.	0,255,255	60	23.319	18.51	23.9015	22.6909	1.04208e-06	3.2714e-10	1.17483e-06	1.16808e-06	2	32140000	32310000	10000
G	10	115460000	115480000	10	115860000	115880000	.	.	.	.	0,255,255	59	19.2794	15.7041	17.7901	27.086	1.4912e-09	8.82483e-10	1.98392e-09	0.00103786	1	115470000	115870000	0
G	10	90340000	90360000	10	90560000	90580000	.	.	.	.	0,255,255	59	24.057	21.8814	26.8053	27.3394	2.22887e-06	1.761e-06	0.000979146	0.00103786	3	90336666	90563333	14908
G	10	64960000	64980000	10	65380000	65400000	.	.	.	.	0,255,255	59	20.6978	19.3802	34.7295	18.2291	2.22887e-06	8.82483e-10	0.0767069	2.16455e-09	3	64950000	65390000	20000
G	10	44880000	44900000	10	45340000	45360000	.	.	.	.	0,255,255	59	18.5603	14.9164	17.1254	23.8778	1.4912e-09	1.81436e-13	1.98392e-09	2.50733e-06	3	44883333	45356666	14908
G	10	24660000	24680000	10	24780000	24800000	.	.	.	.	0,255,255	59	24.2168	24.7433	22.2468	27.502	2.22887e-06	0.000722236	2.48327e-06	0.00103786	2	24680000	24790000	10000
G	10	540000	560000	10	840000	860000	.	.	.	.	0,255,255	59	22.6002	22.1021	26.6515	28.2754	2.22887e-06	1.761e-06	0.000979146	0.00103786	4	560000	840000	14142
G	10	134020000	134040000	10	134180000	134200000	.	.	.	.	0,255,255	58	26.0728	20.6981	30.1724	22.486	0.00147877	3.78235e-06	0.00167462	5.28791e-06	2	134040000	134180000	14142
G	10	72680000	72700000	10	72940000	72960000	.	.	.	.	0,255,255	58	23.8829	19.4774	28.0731	20.8939	4.76563e-06	2.36574e-09	0.00167462	5.28791e-06	2	72690000	72960000	10000
G	10	61860000	61880000	10	61960000	61980000	.	.	.	.	0,255,255	58	20.5809	21.0227	23.6915	22.2088	4.76563e-06	3.78235e-06	5.22829e-06	5.28791e-06	1	61870000	61970000	0
G	10	21360000	21380000	10	21540000	21560000	.	.	.	.	0,255,255	58	26.8227	21.0713	20.5164	19.7545	0.00147877	3.78235e-06	5.22829e-06	5.28791e-06	2	21360000	21550000	10000
G	10	7600000	7620000	10	7700000	7720000	.	.	.	.	0,255,255	58	25.1544	29.2785	28.1042	28.3067	0.00147877	0.00123925	0.00167462	0.00174852	1	7610000	7710000	0
G	10	86020000	86040000	10	86280000	86300000	.	.	.	.	0,255,255	57	17.8342	15.8274	17.5806	25.9895	9.85539e-09	6.28171e-09	1.36405e-08	0.00291556	1	86030000	86290000	0
G	10	74140000	74160000	10	74620000	74640000	.	.	.	.	0,255,255	57	16.8251	15.8888	25.8192	17.179	9.85539e-09	6.28171e-09	0.00278029	1.47676e-08	1	74150000	74630000	0
G	10	28020000	28040000	10	28500000	28520000	.	.	.	.	0,255,255	57	23.6947	22.6414	27.4792	27.812	9.96121e-06	7.84837e-06	0.00278029	0.00291556	3	28036666	28490000	21082
G	10	3240000	3260000	10	3800000	3820000	.	.	.	.	0,255,255	57	18.4106	12.4967	19.9137	14.0178	9.85539e-09	2.03845e-12	1.08947e-05	6.66333e-12	4	3270000	3805000	20616
G	10	108160000	108180000	10	108320000	108340000	.	.	.	.	0,255,255	56	28.0031	25.8645	26.1282	27.7023	0.0038976	0.00341246	0.00457112	0.00478933	1	108170000	108330000	0
G	10	104860000	104880000	10	105000000	105020000	.	.	.	.	0,255,255	56	23.3036	21.92	25.8368	26.2054	2.07147e-05	1.62794e-05	0.00457112	0.00478933	1	104870000	105010000	0
G	10	93260000	93280000	10	93400000	93420000	.	.	.	.	0,255,255	56	24.519	25.8809	29.6209	25.179	2.07147e-05	0.00341246	0.00457112	0.00478933	1	93270000	93410000	0
G	10	80840000	80860000	10	80940000	80960000	.	.	.	.	0,255,255	56	29.4696	23.7831	30.0948	28.2591	0.0038976	1.62794e-05	0.00457112	0.00478933	1	80850000	80950000	0
G	10	114900000	114920000	10	115140000	115160000	.	.	.	.	0,255,255	55	21.0166	21.2274	25.7515	22.4224	4.13568e-05	3.28787e-05	0.00739121	4.50358e-05	3	114896666	115143333	14908
G	10	102960000	102980000	10	103300000	103320000	.	.	.	.	0,255,255	55	21.3116	19.3314	24.7967	23.299	4.13568e-05	4.18345e-08	0.00739121	4.50358e-05	3	102963333	103323333	14907
G	10	49560000	49580000	10	49720000	49740000	.	.	.	.	0,255,255	55	19.677	20.5119	27.234	26.0233	4.13568e-05	3.28787e-05	0.00739121	0.0077231	1	49570000	49730000	0
G	10	14240000	14260000	10	14520000	14540000	.	.	.	.	0,255,255	55	25.5912	20.9795	24.1282	26.8435	0.00626236	3.28787e-05	4.51669e-05	0.0077231	4	14235000	14520000	26926
G	10	72680000	72700000	10	73040000	73060000	.	.	.	.	0,255,255	54	16.2742	13.3426	22.3408	12.2885	1.51756e-07	6.51283e-11	8.99009e-05	1.08286e-13	2	72690000	73040000	10000
G	10	61860000	61880000	10	62180000	62200000	.	.	.	.	0,255,255	54	11.8824	12.0266	13.6054	18.021	9.34208e-14	3.24284e-14	2.23168e-10	2.26734e-07	4	61860000	62205000	26926
G	10	3520000	3540000	10	3800000	3820000	.	.	.	.	0,255,255	54	24.5744	21.3773	24.091	25.7079	8.1495e-05	6.58375e-05	8.99009e-05	0.012299	2	3550000	3810000	20000
G	10	102300000	102320000	10	102620000	102640000	.	.	.	.	0,255,255	53	23.5963	18.4097	21.9756	25.7952	0.000153399	2.53183e-07	0.000172868	0.0190987	3	102316666	102636666	14907
G	10	24920000	24940000	10	25360000	25380000	.	.	.	.	0,255,255	53	22.4788	18.6553	28.4463	20.1857	0.000153399	2.53183e-07	0.0180269	0.000171253	2	24940000	25360000	14142
G	10	12240000	12260000	10	12740000	12760000	.	.	.	.	0,255,255	53	21.7038	17.328	13.2987	25.6971	0.000153399	2.53183e-07	6.8584e-10	0.0190987	1	12250000	12750000	0
G	10	116620000	116640000	10	116860000	116880000	.	.	.	.	0,255,255	52	22.8434	18.4471	19.6745	25.9354	0.00028488	6.06736e-07	0.000323203	0.028424	2	116640000	116870000	10000
G	10	106160000	106180000	10	106320000	106340000	.	.	.	.	0,255,255	52	19.0851	19.42	25.7197	20.6124	8.70981e-07	6.06736e-07	0.027289	0.000323183	2	106170000	106350000	20000
G	10	35920000	35940000	10	36200000	36220000	.	.	.	.	0,255,255	52	21.1197	19.0901	22.3215	21.2357	0.00028488	6.06736e-07	0.000323203	0.000323183	2	35940000	36200000	14142
G	10	32320000	32340000	10	32480000	32500000	.	.	.	.	0,255,255	52	28.3368	22.8323	29.217	21.7154	0.0221429	0.000244104	0.027289	0.000323183	2	32320000	32490000	10000
G	10	7900000	7920000	10	9340000	9360000	.	.	.	.	0,255,255	52	18.343	11.8451	15.7486	16.5852	8.70981e-07	4.89651e-13	1.19294e-06	1.27687e-06	3	7910000	9330000	20000
G	10	124040000	124060000	10	124320000	124340000	.	.	.	.	0,255,255	51	16.6572	15.1615	23.0386	18.1955	1.99685e-06	1.73056e-09	0.000589075	2.92358e-06	1	124050000	124330000	0
G	10	120940000	120960000	10	121300000	121320000	.	.	.	.	0,255,255	51	20.2234	18.3772	28.1184	16.7798	0.000524585	1.42248e-06	0.0409719	2.92358e-06	2	120950000	121330000	20000
G	10	119280000	119300000	10	119980000	120000000	.	.	.	.	0,255,255	51	13.9765	15.488	21.2455	20.5882	4.38989e-09	1.73056e-09	0.000589075	0.000596162	5	119266000	119998000	25298
G	10	117540000	117560000	10	118040000	118060000	.	.	.	.	0,255,255	51	13.8307	16.4674	18.5839	22.6109	4.38989e-09	1.42248e-06	2.77709e-06	0.000596162	5	117538000	118050000	28000
G	10	104660000	104680000	10	105000000	105020000	.	.	.	.	0,255,255	51	12.143	14.7953	18.7052	18.2651	5.00087e-12	1.73056e-09	2.77709e-06	2.92358e-06	1	104670000	105010000	0
G	10	73080000	73100000	10	73320000	73340000	.	.	.	.	0,255,255	51	20.5527	19.8152	24.1503	23.0805	0.000524585	0.000458087	0.000589075	0.000596162	1	73090000	73330000	0
G	10	73060000	73080000	10	73560000	73580000	.	.	.	.	0,255,255	51	18.3731	12.3745	17.2611	14.6594	1.99685e-06	1.81652e-12	2.77709e-06	5.11283e-09	1	73070000	73570000	0
G	10	44160000	44180000	10	45360000	45380000	.	.	.	.	0,255,255	51	7.34966	6.31208	9.48183	9.56884	1.37292e-19	3.15662e-19	2.11582e-15	1.50678e-15	5	44154000	45362000	52154
G	10	22840000	22860000	10	23260000	23280000	.	.	.	.	0,255,255	51	18.4089	19.0047	21.247	30.1039	1.99685e-06	1.42248e-06	0.000589075	0.0425935	2	22850000	23280000	10000
G	10	4880000	4900000	10	5320000	5340000	.	.	.	.	0,255,255	51	14.2251	12.3363	23.3383	14.0807	4.38989e-09	1.81652e-12	0.000589075	5.11283e-09	1	4890000	5330000	0
G	10	111640000	111660000	10	112040000	112060000	.	.	.	.	0,255,255	50	14.8527	9.6723	15.1712	12.3553	1.17599e-08	2.75681e-15	1.58062e-08	1.96398e-11	2	111650000	112040000	10000
G	10	88140000	88160000	10	88340000	88360000	.	.	.	.	0,255,255	50	22.9596	18.3072	19.6606	19.4725	0.000950898	3.25008e-06	0.00107508	6.46841e-06	1	88150000	88350000	0
G	10	62560000	62580000	10	63040000	63060000	.	.	.	.	0,255,255	50	13.5472	11.6733	17.8022	12.1183	1.17599e-08	6.22024e-12	6.1456e-06	1.96398e-11	1	62570000	63050000	0
G	10	52760000	52780000	10	53760000	53780000	.	.	.	.	0,255,255	50	14.9731	13.064	17.1901	15.0722	1.17599e-08	4.98159e-09	6.1456e-06	1.48768e-08	1	52770000	53770000	0
G	10	43780000	43800000	10	43940000	43960000	.	.	.	.	0,255,255	50	18.6036	21.3111	24.3346	24.6371	4.52919e-06	0.000843356	0.00107508	0.0619625	2	43780000	43960000	14142
G	10	100220000	100240000	10	100400000	100420000	.	.	.	.	0,255,255	49	23.8799	20.4093	23.7041	20.2343	0.0016728	0.00151719	0.00192536	0.00193903	1	100230000	100410000	0
G	10	35520000	35540000	10	35860000	35880000	.	.	.	.	0,255,255	49	21.8224	17.2584	19.8955	22.7593	0.0016728	7.45621e-06	0.00192536	0.00193903	2	35530000	35850000	20000
G	10	21780000	21800000	10	22000000	22020000	.	.	.	.	0,255,255	49	24.4993	20.6377	18.2919	25.4795	0.0016728	0.00151719	1.3523e-05	0.0879148	2	21790000	22020000	10000
G	10	15460000	15480000	10	15860000	15880000	.	.	.	.	0,255,255	49	21.4594	13.9997	27.2053	14.8509	0.0016728	1.39651e-08	0.0853215	4.0091e-08	2	15470000	15860000	10000
G	10	3820000	3840000	10	4100000	4120000	.	.	.	.	0,255,255	49	20.9337	19.3769	22.91	21.3899	0.0016728	7.45621e-06	0.00192536	0.00193903	1	3830000	4110000	0
G	10	124100000	124120000	10	124320000	124340000	.	.	.	.	0,255,255	48	13.9719	16.7368	19.708	24.1284	8.40834e-08	1.62498e-05	0.00334899	0.0033844	1	124110000	124330000	0
G	10	100220000	100240000	10	101000000	101020000	.	.	.	.	0,255,255	48	12.6716	12.1837	18.1685	15.4676	8.40834e-08	7.27803e-11	2.86589e-05	1.07259e-07	3	100250000	101016666	21082
G	10	7900000	7920000	10	9240000	9260000	.	.	.	.	0,255,255	48	10.3611	12.7475	16.7771	17.0135	1.68646e-10	3.8396e-08	2.86589e-05	3.09954e-05	3	7916666	9256666	14907
G	10	126720000	126740000	10	126820000	126840000	.	.	.	.	0,255,255	47	22.1725	19.3	19.3653	23.2871	0.00482765	3.51663e-05	6.11853e-05	0.00582285	1	126730000	126830000	0
G	10	120000000	120020000	10	120180000	120200000	.	.	.	.	0,255,255	47	15.8478	14.4157	14.0489	18.7404	4.73116e-05	1.04834e-07	2.92296e-07	6.56083e-05	2	120020000	120190000	10000
G	10	114320000	114340000	10	114880000	114900000	.	.	.	.	0,255,255	47	13.2042	14.3089	17.7297	16.625	2.24791e-07	1.04834e-07	6.11853e-05	6.56083e-05	2	114320000	114890000	10000
G	10	31800000	31820000	10	32080000	32100000	.	.	.	.	0,255,255	47	19.1751	16.9649	16.899	24.2474	4.73116e-05	3.51663e-05	6.11853e-05	0.00582285	1	31810000	32090000	0
G	10	105640000	105660000	10	105960000	105980000	.	.	.	.	0,255,255	46	17.8857	15.8758	19.3323	22.1589	9.80026e-05	7.4784e-05	0.000127292	0.00974696	1	105650000	105970000	0
G	10	84560000	84580000	10	85620000	85640000	.	.	.	.	0,255,255	46	11.1997	13.4029	15.4709	19.3131	1.88345e-09	2.78173e-07	7.70206e-07	0.000136105	2	84560000	85630000	10000
G	10	26880000	26900000	10	27160000	27180000	.	.	.	.	0,255,255	46	11.9551	12.9344	11.9912	21.9977	1.88345e-09	2.78173e-07	2.29261e-09	0.00974696	1	26890000	27170000	0
G	10	22280000	22300000	10	23260000	23280000	.	.	.	.	0,255,255	46	13.0254	14.3113	18.9793	19.2379	5.81933e-07	2.78173e-07	0.000127292	0.000136105	1	22290000	23270000	0
G	10	6140000	6160000	10	6440000	6460000	.	.	.	.	0,255,255	46	16.4983	12.4484	10.2362	19.8484	9.80026e-05	2.78173e-07	2.29261e-09	0.00974696	2	6140000	6450000	10000
G	10	64360000	64380000	10	64900000	64920000	.	.	.	.	0,255,255	45	10.6754	9.38498	11.1254	13.2002	5.28339e-09	3.93588e-12	7.32373e-09	1.78501e-06	6	64346666	64900000	50111
G	10	44160000	44180000	10	44880000	44900000	.	.	.	.	0,255,255	45	11.5944	8.74275	15.2775	7.80501	5.28339e-09	3.93588e-12	1.85669e-06	1.19706e-14	4	44175000	44870000	20616
G	10	33600000	33620000	10	34920000	34940000	.	.	.	.	0,255,255	45	12.202	9.59338	12.9838	12.9153	5.28339e-09	3.93588e-12	1.85669e-06	1.78501e-06	2	33620000	34930000	10000
G	10	4900000	4920000	10	5120000	5140000	.	.	.	.	0,255,255	45	17.6916	14.8211	23.7541	14.8154	0.000197235	7.21584e-07	0.0157673	1.78501e-06	3	4896666	5136666	14907
G	10	110900000	110920000	10	111180000	111200000	.	.	.	.	0,255,255	44	14.9476	17.3426	19.2453	19.306	3.55615e-06	0.000310716	0.000497374	0.00053038	1	110910000	111190000	0
G	10	94800000	94820000	10	95240000	95260000	.	.	.	.	0,255,255	44	10.3345	12.3072	14.0365	16.5918	1.59107e-08	7.81674e-09	4.41725e-06	0.00053038	4	94820000	95265000	26926
G	10	81820000	81840000	10	81960000	81980000	.	.	.	.	0,255,255	44	18.1261	18.7988	22.8272	23.8145	0.000390762	0.000310716	0.0255248	0.0255239	2	81820000	81980000	14142
G	10	79800000	79820000	10	80940000	80960000	.	.	.	.	0,255,255	44	14.514	10.3095	15.187	12.6915	3.55615e-06	7.81674e-09	4.41725e-06	4.39815e-06	1	79810000	80950000	0
G	10	24480000	24500000	10	24800000	24820000	.	.	.	.	0,255,255	44	15.9647	14.833	17	24.1478	0.000390762	1.82292e-06	0.000497374	0.0255239	3	24483333	24803333	14907
G	10	23000000	23020000	10	23260000	23280000	.	.	.	.	0,255,255	44	21.3593	18.608	20.5384	24.2088	0.0202843	0.000310716	0.0255248	0.0255239	2	23010000	23250000	20000
G	10	122700000	122720000	10	123640000	123660000	.	.	.	.	0,255,255	43	8.7596	8.07976	15.6766	8.32468	1.3982e-10	6.09127e-11	0.000954867	1.66e-10	4	122705000	123650000	20616
G	10	61380000	61400000	10	61800000	61820000	.	.	.	.	0,255,255	43	13.976	11.9042	16.3643	14.7397	8.36954e-06	2.36443e-08	0.000954867	1.06447e-05	3	61403333	61790000	33334
G	10	45960000	45980000	10	46200000	46220000	.	.	.	.	0,255,255	43	16.5444	14.7193	18.8656	16.5208	0.000750272	4.47835e-06	0.000954867	0.00101937	1	45970000	46210000	0
G	10	33600000	33620000	10	34800000	34820000	.	.	.	.	0,255,255	43	12.4287	14.3745	20.8896	14.2752	8.36954e-06	4.47835e-06	0.0397036	1.06447e-05	2	33590000	34810000	20000
G	10	16860000	16880000	10	17460000	17480000	.	.	.	.	0,255,255	43	10.8445	10.3644	18.8586	8.99007	4.61576e-08	2.36443e-08	0.000954867	1.66e-10	1	16870000	17470000	0
G	10	97780000	97800000	10	98020000	98040000	.	.	.	.	0,255,255	42	17.2907	18.7285	21.9911	20.1869	0.00142013	0.00118991	0.0606561	0.0606015	3	97783333	98050000	21082
G	10	95300000	95320000	10	95580000	95600000	.	.	.	.	0,255,255	42	15.601	11.9154	15.3131	13.8843	0.00142013	7.03452e-08	2.47874e-05	2.46817e-05	1	95310000	95590000	0
G	10	91540000	91560000	10	92600000	92620000	.	.	.	.	0,255,255	42	15.8135	10.4569	15.5695	13.2549	0.00142013	7.03452e-08	0.00179882	2.46817e-05	1	91550000	92610000	0
G	10	63100000	63120000	10	63320000	63340000	.	.	.	.	0,255,255	42	15.2224	18.2772	19.2475	18.2687	1.96447e-05	0.00118991	0.00179882	0.00192477	1	63110000	63330000	0
G	10	44160000	44180000	10	44820000	44840000	.	.	.	.	0,255,255	42	14.6724	11.9374	20.105	12.8523	1.96447e-05	7.03452e-08	0.0606561	2.46817e-05	2	44180000	44830000	10000
G	10	43360000	43380000	10	43600000	43620000	.	.	.	.	0,255,255	42	16.0485	13.7523	18.5034	13.8251	0.00142013	1.08279e-05	0.00179882	2.46817e-05	3	43370000	43590000	20000
G	10	31020000	31040000	10	32080000	32100000	.	.	.	.	0,255,255	42	13.3537	12.7942	19.1694	14.681	1.96447e-05	1.08279e-05	0.00179882	2.46817e-05	3	31003333	32103333	33993
G	10	28040000	28060000	10	28660000	28680000	.	.	.	.	0,255,255	41	12.0105	12.2668	16.2037	12.8456	3.67119e-07	2.02978e-07	0.00332372	5.7195e-05	3	28050000	28676666	24037
G	10	12300000	12320000	10	13100000	13120000	.	.	.	.	0,255,255	41	12.0421	10.1789	11.7934	13.3403	3.67119e-07	2.02978e-07	5.19666e-07	5.7195e-05	1	12310000	13110000	0
G	10	79800000	79820000	10	80260000	80280000	.	.	.	.	0,255,255	40	14.5722	13.6383	18.672	11.3696	9.61479e-05	5.92051e-05	0.00600568	1.42612e-06	1	79810000	80270000	0
G	10	61020000	61040000	10	61320000	61340000	.	.	.	.	0,255,255	40	14.5938	13.8638	18.1411	16.4356	9.61479e-05	5.92051e-05	0.00600568	0.006275	3	61016666	61350000	24037
G	10	52820000	52840000	10	53760000	53780000	.	.	.	.	0,255,255	40	12.3306	14.7754	18.5004	17.4439	9.87901e-07	5.92051e-05	0.00600568	0.006275	6	52820000	53736666	34802
G	10	47060000	47080000	10	47640000	47660000	.	.	.	.	0,255,255	40	6.27822	16.9299	14.8233	19.2372	1.18768e-11	0.00408138	0.000121738	0.006275	1	47070000	47650000	0
G	10	5180000	5200000	10	5280000	5300000	.	.	.	.	0,255,255	40	13.9079	17.9792	16.5291	17.2505	9.61479e-05	0.00408138	0.00600568	0.006275	1	5190000	5290000	0
G	10	61420000	61440000	10	61780000	61800000	.	.	.	.	0,255,255	39	10.899	11.1855	13.0164	14.8164	2.67194e-06	1.56981e-06	0.000261891	0.000269024	1	61430000	61790000	0
G	10	15920000	15940000	10	16820000	16840000	.	.	.	.	0,255,255	39	11.0466	7.80764	11.5965	10.4677	2.67194e-06	4.16765e-11	3.75931e-06	3.76439e-06	5	15942000	16834000	25298
G	10	15920000	15940000	10	16580000	16600000	.	.	.	.	0,255,255	39	12.3558	10.7171	15.7648	11.5988	2.67194e-06	1.56981e-06	0.0106154	3.76439e-06	1	15930000	16590000	0
G	10	119280000	119300000	10	120200000	120220000	.	.	.	.	0,255,255	38	9.36036	10.5888	13.8534	13.0982	6.44935e-08	4.20506e-06	0.000546816	0.000568928	1	119290000	120210000	0
G	10	78320000	78340000	10	78720000	78740000	.	.	.	.	0,255,255	38	14.1984	13.7555	15.2394	16.8379	0.000420835	0.000288967	0.000546816	0.0186876	2	78320000	78740000	14142
G	10	78060000	78080000	10	78740000	78760000	.	.	.	.	0,255,255	38	8.44407	11.3733	12.0117	14.6701	6.44935e-08	4.20506e-06	9.39715e-06	0.000568928	1	78070000	78750000	0
G	10	63020000	63040000	10	63480000	63500000	.	.	.	.	0,255,255	38	13.0249	13.3723	14.9568	17.544	0.000420835	0.000288967	0.000546816	0.0186876	2	63040000	63490000	10000
G	10	21560000	21580000	10	22020000	22040000	.	.	.	.	0,255,255	38	11.6695	12.165	15.7896	14.9808	6.93499e-06	4.20506e-06	0.0181262	0.000568928	4	21575000	22025000	25495
G	10	8080000	8100000	10	9220000	9240000	.	.	.	.	0,255,255	38	10.8306	13.026	14.1819	14.9422	6.93499e-06	0.000288967	0.000546816	0.000568928	3	8096666	9243333	14908
G	10	4560000	4580000	10	4800000	4820000	.	.	.	.	0,255,255	38	13.553	13.5541	15.1083	18.5747	0.000420835	0.000288967	0.000546816	0.0186876	2	4560000	4810000	10000
G	10	124820000	124840000	10	125280000	125300000	.	.	.	.	0,255,255	36	11.3192	10.8703	13.7922	14.9802	4.1741e-05	2.73749e-05	0.00221696	0.00229993	5	124826000	125314000	46819
G	10	124800000	124820000	10	125320000	125340000	.	.	.	.	0,255,255	36	11.5712	9.41794	12.3554	12.7891	4.1741e-05	3.30057e-07	5.38428e-05	0.00229993	1	124810000	125330000	0
G	10	110540000	110560000	10	111180000	111200000	.	.	.	.	0,255,255	36	9.49566	12.1722	10.9379	15.3208	5.87805e-07	2.73749e-05	5.38428e-05	0.00229993	1	110550000	111190000	0
G	10	21780000	21800000	10	22220000	22240000	.	.	.	.	0,255,255	36	8.81297	9.65202	11.1155	15.1509	5.87805e-07	3.30057e-07	5.38428e-05	0.00229993	2	21800000	22230000	10000
G	10	4860000	4880000	10	5420000	5440000	.	.	.	.	0,255,255	36	14.8498	8.68605	13.9494	10.9154	0.00167733	3.30057e-07	0.00221696	5.85598e-05	1	4870000	5430000	0
G	10	114240000	114260000	10	114720000	114740000	.	.	.	.	0,255,255	35	12.9832	12.2467	16.6314	12.2902	0.00320255	6.73644e-05	0.0757675	0.00014012	2	114250000	114720000	10000
G	10	70760000	70780000	10	71140000	71160000	.	.	.	.	0,255,255	35	10.1026	9.91423	12.0264	14.3831	9.7188e-05	6.73644e-05	0.00012711	0.00441072	2	70760000	71150000	10000
G	10	64580000	64600000	10	64900000	64920000	.	.	.	.	0,255,255	35	12.6172	9.81708	11.7212	9.67579	0.00320255	1.02384e-06	0.00012711	2.5818e-06	1	64590000	64910000	0
G	10	12760000	12780000	10	13100000	13120000	.	.	.	.	0,255,255	35	12.5295	10.8156	10.5949	13.4271	0.00320255	6.73644e-05	0.00012711	0.00441072	2	12760000	13120000	14142
G	10	9780000	9800000	10	9900000	9920000	.	.	.	.	0,255,255	35	16.6459	17.6416	17.7361	16.6472	0.0555399	0.0556385	0.0757675	0.0776056	2	9780000	9920000	14142
G	10	3260000	3280000	10	4800000	4820000	.	.	.	.	0,255,255	35	8.29537	6.56176	9.53694	9.87913	1.78912e-06	1.11309e-08	2.60394e-06	0.00014012	3	3250000	4803333	24037
G	10	122720000	122740000	10	123480000	123500000	.	.	.	.	0,255,255	34	8.80924	8.45653	14.8922	8.72119	4.92004e-06	3.07394e-06	0.0079321	7.55868e-06	2	122720000	123490000	10000
G	10	98280000	98300000	10	98620000	98640000	.	.	.	.	0,255,255	34	15.0939	14.4582	14.4838	10.6846	0.00592959	0.00481597	0.0079321	0.000313899	1	98290000	98630000	0
G	10	81260000	81280000	10	81960000	81980000	.	.	.	.	0,255,255	34	6.73142	7.09783	9.68952	9.87281	5.55641e-08	3.78865e-08	7.24739e-06	0.000313899	3	81290000	81983333	24037
G	10	77140000	77160000	10	77800000	77820000	.	.	.	.	0,255,255	34	11.3663	9.85677	14.2421	10.0901	0.000222697	0.000160078	0.0079321	0.000313899	1	77150000	77810000	0
G	10	35920000	35940000	10	37060000	37080000	.	.	.	.	0,255,255	34	7.98266	8.61532	14.122	9.65128	4.92004e-06	3.07394e-06	0.0079321	7.55868e-06	2	35920000	37070000	10000
G	10	7560000	7580000	10	9340000	9360000	.	.	.	.	0,255,255	34	6.33212	4.50503	6.26135	6.11564	5.55641e-08	7.01498e-13	7.87644e-08	5.35247e-10	2	7560000	9360000	14142
G	10	3260000	3280000	10	4700000	4720000	.	.	.	.	0,255,255	34	7.33718	8.44434	15.2348	7.12818	5.55641e-08	3.07394e-06	0.0079321	8.76468e-08	1	3270000	4710000	0
G	10	94640000	94660000	10	95260000	95280000	.	.	.	.	0,255,255	33	8.33862	6.99207	8.94001	11.7953	1.33619e-05	1.29393e-07	1.8901e-05	0.000681913	1	94650000	95270000	0
G	10	79960000	79980000	10	80940000	80960000	.	.	.	.	0,255,255	33	11.6563	10.3177	13.2172	14.8563	0.000488567	0.000365593	0.0142996	0.0149253	2	79980000	80950000	10000
G	10	52740000	52760000	10	53720000	53740000	.	.	.	.	0,255,255	33	10.9195	10.394	11.8237	14.1701	0.000488567	0.000365593	0.000641389	0.0149253	1	52750000	53730000	0
G	10	121700000	121720000	10	122620000	122640000	.	.	.	.	0,255,255	32	11.8603	6.64824	8.7079	7.46569	0.00104296	4.36022e-07	5.06983e-05	1.0206e-06	1	121710000	122630000	0
G	10	119240000	119260000	10	120220000	120240000	.	.	.	.	0,255,255	32	10.4676	9.35748	12.7727	10.2065	0.00104296	2.48889e-05	0.0251387	0.00145027	2	119250000	120210000	20000
G	10	81280000	81300000	10	81900000	81920000	.	.	.	.	0,255,255	32	7.2597	7.27724	13.3753	7.44892	6.72015e-07	4.36022e-07	0.0251387	1.0206e-06	2	81270000	81910000	20000
G	10	81100000	81120000	10	81900000	81920000	.	.	.	.	0,255,255	32	7.95359	6.48398	6.67537	11.6654	3.65068e-05	4.36022e-07	9.23504e-07	0.00145027	1	81110000	81910000	0
G	10	21560000	21580000	10	22220000	22240000	.	.	.	.	0,255,255	32	10.9957	12.5809	12.7523	14.0372	0.00104296	0.0162409	0.0251387	0.0262422	2	21570000	22250000	20000
G	10	102960000	102980000	10	103520000	103540000	.	.	.	.	0,255,255	31	6.90266	6.6291	8.87493	8.95715	2.17437e-06	1.54098e-06	0.000127624	0.000139757	4	102965000	103535000	35355
G	10	31000000	31020000	10	32280000	32300000	.	.	.	.	0,255,255	31	7.63339	6.93147	10.2439	6.59601	2.17437e-06	1.54098e-06	0.00285147	3.15818e-06	1	31010000	32290000	0
G	10	12220000	12240000	10	13160000	13180000	.	.	.	.	0,255,255	31	14.7379	9.50263	9.34211	12.5317	0.0310843	6.68908e-05	0.000127624	0.0444217	4	12240000	13145000	36401
G	10	3820000	3840000	10	4700000	4720000	.	.	.	.	0,255,255	31	11.325	11.8609	14.7731	13.9994	0.00214366	0.0017752	0.0423602	0.0444217	3	3836666	4723333	27488
G	10	116300000	116320000	10	116880000	116900000	.	.	.	.	0,255,255	30	5.53365	7.221	6.56971	10.7449	1.37328e-07	4.93173e-06	9.58496e-06	0.00603059	1	116310000	116890000	0
G	10	116220000	116240000	10	116880000	116900000	.	.	.	.	0,255,255	30	6.83647	7.72745	9.40864	10.7489	7.03825e-06	4.93173e-06	0.000317014	0.00603059	1	116230000	116890000	0
G	10	104640000	104660000	10	105060000	105080000	.	.	.	.	0,255,255	30	11.3117	11.6326	13.5137	14.6986	0.00420595	0.00366747	0.0687962	0.0721752	2	104640000	105080000	14142
G	10	30280000	30300000	10	30860000	30880000	.	.	.	.	0,255,255	30	7.9003	7.49215	9.38312	11.1903	0.000226592	4.93173e-06	0.000317014	0.00603059	1	30290000	30870000	0
G	10	26940000	26960000	10	27300000	27320000	.	.	.	.	0,255,255	30	9.86685	9.69739	10.796	7.79309	0.00420595	0.000170239	0.00563215	1.02914e-05	1	26950000	27310000	0
G	10	59100000	59120000	10	59820000	59840000	.	.	.	.	0,255,255	29	5.49245	5.58405	7.31474	7.51619	4.82934e-07	3.5851e-07	2.7827e-05	2.89311e-05	1	59110000	59830000	0
G	10	49860000	49880000	10	50720000	50740000	.	.	.	.	0,255,255	29	9.44863	7.70513	8.88005	9.037	0.000537055	1.49159e-05	0.000719798	0.00080033	1	49870000	50730000	0
G	10	22320000	22340000	10	23320000	23340000	.	.	.	.	0,255,255	29	10.1076	8.31978	9.63565	11.479	0.00800599	0.000414028	0.000719798	0.0116507	3	22316666	23336666	14907
G	10	77160000	77180000	10	78300000	78320000	.	.	.	.	0,255,255	28	6.51791	8.10804	9.68706	9.10689	5.93932e-05	0.000978643	0.00163764	0.00179869	1	77170000	78310000	0
G	10	38260000	38280000	10	38640000	38660000	.	.	.	.	0,255,255	28	7.59343	8.7982	9.64066	10.8201	5.93932e-05	0.000978643	0.00163764	0.0218705	2	38280000	38640000	14142
G	10	19660000	19680000	10	20140000	20160000	.	.	.	.	0,255,255	28	9.19438	9.51478	9.57196	9.26167	0.0012333	0.000978643	0.00163764	0.00179869	1	19670000	20150000	0
G	10	64320000	64340000	10	65460000	65480000	.	.	.	.	0,255,255	27	4.39765	7.4547	8.76699	8.98942	8.13737e-08	0.000129915	0.00356938	0.00380603	1	64330000	65470000	0
G	10	62720000	62740000	10	63980000	64000000	.	.	.	.	0,255,255	27	4.21541	5.54358	6.79806	6.34626	8.13737e-08	4.73567e-06	0.000223215	0.000217417	1	62730000	63990000	0
G	10	60540000	60560000	10	60920000	60940000	.	.	.	.	0,255,255	27	7.31915	7.13701	8.0586	9.28678	0.000162787	0.000129915	0.00356938	0.00380603	1	60550000	60930000	0
G	10	52740000	52760000	10	53960000	53980000	.	.	.	.	0,255,255	27	9.20062	8.4528	11.6756	11.1512	0.00262357	0.00223305	0.0359919	0.0387801	2	52750000	53980000	10000
G	10	81320000	81340000	10	82000000	82020000	.	.	.	.	0,255,255	26	3.39152	5.41331	6.05438	6.2376	4.79219e-09	1.67028e-05	2.88058e-05	0.000579433	2	81330000	82020000	10000
G	10	68700000	68720000	10	69260000	69280000	.	.	.	.	0,255,255	26	8.02804	7.06874	6.53687	8.04848	0.00542429	0.000346284	0.000582106	0.00791229	1	68710000	69270000	0
G	10	125340000	125360000	10	126060000	126080000	.	.	.	.	0,255,255	23	5.47312	4.90789	6.4549	6.28664	0.000496366	2.80067e-05	0.00775376	0.00745358	2	125350000	126050000	20000
G	10	26620000	26640000	10	27260000	27280000	.	.	.	.	0,255,255	22	4.93075	5.08399	6.98235	4.43488	8.69802e-05	0.0014252	0.0162771	0.000188934	1	26630000	27270000	0
G	10	9380000	9400000	10	11480000	11500000	.	.	.	.	0,255,255	21	7.15518	4.75601	7.71228	4.97385	0.022103	0.000365501	0.0324674	0.00540901	3	9376666	11490000	21082
G	10	43260000	43280000	10	45480000	45500000	.	.	.	.	0,255,255	16	1.69733	2.49398	2.09957	2.5876	6.68028e-06	0.000212757	0.000255833	0.00246248	1	43270000	45490000	0
G	10	118560000	118580000	10	120280000	120300000	.	.	.	.	0,255,255	15	2.61506	2.83089	2.84375	2.46895	0.00340514	0.00712392	0.0080735	0.000924583	1	118570000	120290000	0
G	11	44940000	44960000	11	45120000	45140000	.	.	.	.	0,255,255	130	35.7686	26.6482	26.9691	23.8967	4.25167e-25	2.7014e-34	8.99507e-34	0	3	44963333	45123333	14907
G	11	3860000	3880000	11	4080000	4100000	.	.	.	.	0,255,255	123	36.9593	27.8347	35.7471	41.5423	8.37768e-22	2.55777e-30	6.61408e-22	8.03914e-15	7	3870000	4090000	28284
G	11	85740000	85760000	11	85920000	85940000	.	.	.	.	0,255,255	119	42.4528	42.2201	45.6344	52.0099	1.35884e-13	1.13985e-13	2.24265e-13	8.50911e-08	9	85743333	85936666	37712
G	11	46900000	46920000	11	47160000	47180000	.	.	.	.	0,255,255	117	34.5979	26.0074	29.2648	34.7077	3.26155e-19	4.36355e-27	9.14832e-27	4.47329e-19	10	46920000	47170000	36056
G	11	129780000	129800000	11	130000000	130020000	.	.	.	.	0,255,255	115	34.9585	26.6433	32.6911	31.6471	2.06053e-18	4.71168e-26	1.62677e-18	2.72139e-18	8	129795000	129997500	37165
G	11	116740000	116760000	11	116960000	116980000	.	.	.	.	0,255,255	115	37.7885	39.7101	44.1112	53.6442	2.06053e-18	2.46899e-12	4.01308e-12	6.36053e-07	7	116732857	116975714	43236
G	11	12120000	12140000	11	12240000	12260000	.	.	.	.	0,255,255	114	42.5396	50.0726	46.6817	59.4424	5.37005e-12	1.47728e-06	8.33254e-12	1.01879e-06	4	12125000	12265000	29155
G	11	85760000	85780000	11	85880000	85900000	.	.	.	.	0,255,255	113	47.5149	50.6253	55.8435	51.8406	1.0468e-11	2.41737e-06	1.62922e-06	1.64079e-06	1	85770000	85890000	0
G	11	75140000	75160000	11	75240000	75260000	.	.	.	.	0,255,255	113	42.8747	33.673	39.6223	36.6538	1.0468e-11	7.85758e-18	1.72901e-11	1.73363e-17	3	75136666	75243333	14908
G	11	72540000	72560000	11	72880000	72900000	.	.	.	.	0,255,255	113	26.7038	25.0506	30.8333	30.8235	1.30322e-24	5.10076e-25	1.08875e-24	9.39272e-25	2	72540000	72890000	10000
G	11	47960000	47980000	11	48120000	48140000	.	.	.	.	0,255,255	112	44.9924	36.6425	38.2737	45.7332	2.1743e-11	2.01611e-17	2.79679e-17	3.4165e-11	3	47976666	48130000	33334
G	11	130300000	130320000	11	130700000	130720000	.	.	.	.	0,255,255	108	24.3982	18.4754	26.9147	26.7276	1.24403e-29	4.15715e-38	3.80668e-22	2.87987e-22	11	130313636	130726363	61711
G	11	122980000	123000000	11	123100000	123120000	.	.	.	.	0,255,255	107	34.8718	35.6116	43.0984	41.849	3.75494e-15	2.30559e-15	1.39942e-09	1.33135e-09	5	122974000	123114000	28844
G	11	44640000	44660000	11	44920000	44940000	.	.	.	.	0,255,255	107	24.2478	20.8822	19.7968	34.8195	4.77422e-29	3.10734e-29	4.48532e-29	4.46332e-15	4	44650000	44925000	20616
G	11	33880000	33900000	11	33980000	34000000	.	.	.	.	0,255,255	105	46.7551	42.3453	48.318	47.0946	3.21908e-09	3.66673e-09	5.37045e-09	5.21373e-09	3	33876666	33996666	14907
G	11	62160000	62180000	11	62320000	62340000	.	.	.	.	0,255,255	103	50.8979	37.3196	52.1322	32.9735	7.45667e-05	7.84126e-14	0.000193008	1.19233e-13	1	62170000	62330000	0
G	11	19580000	19600000	11	19760000	19780000	.	.	.	.	0,255,255	103	34.7025	25.5237	38.529	24.8362	1.0326e-13	4.27399e-20	1.01406e-13	8.61101e-20	4	19595000	19745000	35355
G	11	12980000	13000000	11	13160000	13180000	.	.	.	.	0,255,255	103	34.1861	28.0399	33.381	31.2078	1.0326e-13	4.27399e-20	1.01406e-13	1.19233e-13	4	12995000	13185000	25495
G	11	86160000	86180000	11	86520000	86540000	.	.	.	.	0,255,255	102	23.24	22.6687	28.7075	37.8937	3.44058e-26	2.11492e-26	2.31884e-19	2.75015e-13	9	86161111	86554444	56263
G	11	33180000	33200000	11	33340000	33360000	.	.	.	.	0,255,255	102	30.1137	27.3664	35.2311	37.1265	2.7356e-19	1.25965e-19	2.45649e-13	2.75015e-13	4	33185000	33345000	35355
G	11	118260000	118280000	11	118360000	118380000	.	.	.	.	0,255,255	100	45.883	36.942	52.0348	37.8552	7.75164e-08	9.84283e-13	0.000741662	1.34961e-12	2	118260000	118370000	10000
G	11	122500000	122520000	11	122640000	122660000	.	.	.	.	0,255,255	98	44.1867	40.5294	58.2681	46.7604	2.50038e-07	3.59332e-07	0.00158095	4.5895e-07	2	122510000	122640000	10000
G	11	46400000	46420000	11	46540000	46560000	.	.	.	.	0,255,255	98	33.486	30.4879	33.1845	36.092	6.26913e-12	8.92973e-18	6.51037e-12	7.07922e-12	4	46425000	46555000	25495
G	11	74840000	74860000	11	74940000	74960000	.	.	.	.	0,255,255	97	47.3468	38.5488	41.9846	40.9411	4.42522e-07	1.11245e-11	8.4167e-07	7.8504e-07	2	74840000	74940000	14142
G	11	111740000	111760000	11	111860000	111880000	.	.	.	.	0,255,255	96	38.9125	35.9246	40.7378	46.2602	8.00031e-07	2.4666e-11	1.46298e-06	1.39195e-06	2	111750000	111860000	10000
G	11	14320000	14340000	11	14460000	14480000	.	.	.	.	0,255,255	96	34.5239	31.0402	39.3074	37.5347	3.1391e-11	2.4666e-11	1.46298e-06	3.59804e-11	6	14333333	14476666	37268
G	11	111140000	111160000	11	111280000	111300000	.	.	.	.	0,255,255	95	33.8945	28.4545	36.5386	33.8008	6.73088e-11	1.99805e-16	7.61779e-11	7.94804e-11	5	111162000	111294000	25298
G	11	128040000	128060000	11	128140000	128160000	.	.	.	.	0,255,255	94	36.5409	31.7833	33.432	42.5544	1.4893e-10	1.22597e-10	1.67085e-10	4.2358e-06	1	128050000	128150000	0
G	11	111480000	111500000	11	111580000	111600000	.	.	.	.	0,255,255	94	41.3015	44.932	52.7585	40.1135	2.49029e-06	3.54306e-06	0.00661894	4.2358e-06	1	111490000	111590000	0
G	11	43900000	43920000	11	44060000	44080000	.	.	.	.	0,255,255	94	34.4948	25.4795	26.0135	35.0455	1.4893e-10	5.58982e-16	9.56808e-16	1.7594e-10	4	43920000	44060000	14142
G	11	27200000	27220000	11	27320000	27340000	.	.	.	.	0,255,255	94	36.8652	33.5912	47.6865	31.0326	1.4893e-10	1.22597e-10	4.56165e-06	1.7594e-10	2	27210000	27320000	10000
G	11	73100000	73120000	11	73360000	73380000	.	.	.	.	0,255,255	93	28.4467	23.2898	25.4106	30.9551	2.84131e-15	1.79613e-21	2.52175e-15	3.84997e-10	3	73123333	73363333	14907
G	11	125780000	125800000	11	126040000	126060000	.	.	.	.	0,255,255	92	21.7165	17.1379	26.001	22.8094	1.16475e-20	1.77028e-27	6.78521e-15	1.34815e-20	8	125795000	126062500	37165
G	11	62660000	62680000	11	62780000	62800000	.	.	.	.	0,255,255	91	31.8524	23.7234	25.5657	27.5333	1.50065e-09	2.15772e-20	1.83454e-14	2.01251e-14	2	62680000	62790000	10000
G	11	74160000	74180000	11	74280000	74300000	.	.	.	.	0,255,255	89	38.0719	33.6274	35.4472	40.3836	6.6951e-09	5.34669e-09	7.35771e-09	5.89229e-05	2	74170000	74280000	10000
G	11	61740000	61760000	11	61840000	61860000	.	.	.	.	0,255,255	89	40.778	35.6212	35.9127	48.0749	3.30882e-05	5.34669e-09	7.35771e-09	5.89229e-05	3	61730000	61863333	24037
G	11	32060000	32080000	11	32180000	32200000	.	.	.	.	0,255,255	89	28.9966	25.6431	24.1521	27.7564	1.37962e-13	7.85023e-14	5.17364e-19	1.36402e-13	3	32076666	32196666	14907
G	11	7900000	7920000	11	8000000	8020000	.	.	.	.	0,255,255	89	37.1083	31.3913	30.4316	33.2651	6.6951e-09	5.34669e-09	1.26238e-13	8.13344e-09	1	7910000	8010000	0
G	11	111460000	111480000	11	111640000	111660000	.	.	.	.	0,255,255	87	36.5078	34.0181	49.0966	32.6091	2.75055e-08	2.25838e-08	0.0597105	3.36668e-08	4	111460000	111650000	22361
G	11	85420000	85440000	11	85520000	85540000	.	.	.	.	0,255,255	86	40.5853	37.8562	43.3808	40.7659	0.000136216	4.42724e-08	0.000254854	0.000236755	1	85430000	85530000	0
G	11	74980000	75000000	11	75080000	75100000	.	.	.	.	0,255,255	86	46.5486	36.9322	42.7736	46.8981	0.000136216	4.42724e-08	0.000254854	0.000236755	1	74990000	75090000	0
G	11	13220000	13240000	11	13360000	13380000	.	.	.	.	0,255,255	86	37.4158	34.8553	38.2042	41.8336	5.49521e-08	4.42724e-08	6.16081e-08	0.000236755	4	13245000	13365000	25495
G	11	76520000	76540000	11	76620000	76640000	.	.	.	.	0,255,255	85	38.3566	35.7316	40.0492	40.081	1.11003e-07	9.17834e-08	0.000413397	0.000389611	1	76530000	76630000	0
G	11	86640000	86660000	11	86980000	87000000	.	.	.	.	0,255,255	84	18.3195	15.1606	19.0562	23.6069	3.89292e-22	1.41149e-28	4.88934e-22	1.44585e-16	8	86677500	87000000	44230
G	11	32980000	33000000	11	33080000	33100000	.	.	.	.	0,255,255	84	34.3567	31.2675	40.1221	31.6423	2.14398e-07	1.77849e-07	0.00063773	2.58485e-07	3	32983333	33096666	14908
G	11	27200000	27220000	11	27500000	27520000	.	.	.	.	0,255,255	84	20.5273	14.8831	21.612	22.7739	1.38463e-16	1.41149e-28	1.62172e-16	1.44585e-16	3	27216666	27503333	14908
G	11	10420000	10440000	11	10740000	10760000	.	.	.	.	0,255,255	84	22.8137	17.7893	23.0916	29.7792	1.38463e-16	1.38923e-22	1.62172e-16	1.39001e-11	5	10430000	10746000	25612
G	11	125020000	125040000	11	125200000	125220000	.	.	.	.	0,255,255	83	29.308	32.2257	38.537	40.5064	3.16502e-11	3.49703e-07	4.71975e-07	0.000938999	4	125025000	125255000	45277
G	11	122080000	122100000	11	122360000	122380000	.	.	.	.	0,255,255	83	25.998	22.6257	22.9087	37.0194	3.16502e-11	2.18239e-16	4.62028e-16	5.07845e-07	2	122080000	122370000	10000
G	11	73680000	73700000	11	73780000	73800000	.	.	.	.	0,255,255	83	45.5882	40.7122	45.461	42.7766	0.000529795	0.000856957	0.00100583	0.000938999	2	73680000	73790000	10000
G	11	66480000	66500000	11	66580000	66600000	.	.	.	.	0,255,255	83	38.5627	30.8242	37.39	37.359	4.21623e-07	1.93816e-11	4.71975e-07	5.07845e-07	2	66480000	66590000	10000
G	11	61220000	61240000	11	61400000	61420000	.	.	.	.	0,255,255	83	36.2033	30.4946	37.7757	32.5405	4.21623e-07	1.93816e-11	4.71975e-07	5.07845e-07	3	61230000	61396666	21082
G	11	118560000	118580000	11	118800000	118820000	.	.	.	.	0,255,255	82	31.4589	29.8849	34.5905	36.1399	7.82539e-07	4.71972e-11	9.01319e-07	9.45706e-07	8	118550000	118835000	40311
G	11	102700000	102720000	11	102800000	102820000	.	.	.	.	0,255,255	82	39.9933	43.7443	44.8652	45.6827	0.000832754	0.00134917	0.00155441	0.00145581	1	102710000	102810000	0
G	11	116660000	116680000	11	116960000	116980000	.	.	.	.	0,255,255	81	26.2899	21.6864	26.309	31.2805	1.79317e-10	2.01071e-15	1.69838e-10	1.78301e-06	5	116658000	116998000	32985
G	11	65640000	65660000	11	65740000	65760000	.	.	.	.	0,255,255	81	42.7397	32.9961	34.3823	38.0681	0.00127171	1.26122e-06	1.70907e-06	1.78301e-06	1	65650000	65750000	0
G	11	33380000	33400000	11	33700000	33720000	.	.	.	.	0,255,255	81	18.6301	17.1488	27.2709	21.8774	1.97486e-20	7.44254e-21	1.69838e-10	4.03852e-15	5	33390000	33710000	20000
G	11	127900000	127920000	11	128020000	128040000	.	.	.	.	0,255,255	80	38.3973	29.427	29.2778	28.5772	2.7694e-06	2.63615e-10	3.93559e-10	4.52278e-10	1	127910000	128030000	0
G	11	122720000	122740000	11	122880000	122900000	.	.	.	.	0,255,255	80	33.0028	27.0728	24.544	39.9611	2.7694e-06	2.63615e-10	1.09469e-14	0.00338363	5	122746000	122898000	25298
G	11	119220000	119240000	11	119340000	119360000	.	.	.	.	0,255,255	80	39.1698	33.2899	42.6991	34.0365	0.00193536	2.39752e-06	0.00361061	3.3723e-06	2	119230000	119340000	10000
G	11	118540000	118560000	11	118840000	118860000	.	.	.	.	0,255,255	80	26.8484	21.3112	26.0914	25.8886	4.1331e-10	5.77069e-15	3.93559e-10	4.52278e-10	1	118550000	118850000	0
G	11	56880000	56900000	11	56980000	57000000	.	.	.	.	0,255,255	80	39.1802	40.4624	38.4988	44.1502	0.00193536	0.00310877	3.26017e-06	0.00338363	3	56883333	57003333	14907
G	11	126180000	126200000	11	126280000	126300000	.	.	.	.	0,255,255	79	35.2568	30.9044	39.6291	32.6083	5.05759e-06	6.20432e-10	0.00535045	6.24902e-06	2	126180000	126290000	10000
G	11	107440000	107460000	11	107540000	107560000	.	.	.	.	0,255,255	79	35.3306	36.3539	37.4602	38.752	5.05759e-06	4.39614e-06	6.01111e-06	6.24902e-06	2	107450000	107560000	10000
G	11	63400000	63420000	11	63500000	63520000	.	.	.	.	0,255,255	79	38.3972	32.1953	30.4637	42.297	5.05759e-06	4.39614e-06	9.26486e-10	0.00503334	2	63420000	63520000	14142
G	11	44640000	44660000	11	44740000	44760000	.	.	.	.	0,255,255	79	43.7241	36.6927	39.3626	36.1914	0.00287589	4.39614e-06	0.00535045	6.24902e-06	1	44650000	44750000	0
G	11	34940000	34960000	11	35400000	35420000	.	.	.	.	0,255,255	79	15.884	11.9223	19.1379	16.491	2.60479e-19	5.24606e-31	3.84047e-19	4.56848e-19	7	34961428	35412857	33320
G	11	44740000	44760000	11	44900000	44920000	.	.	.	.	0,255,255	78	30.6209	27.8318	29.8899	34.9596	2.18812e-09	1.40671e-09	2.12438e-09	1.12914e-05	2	44760000	44910000	10000
G	11	86160000	86180000	11	86300000	86320000	.	.	.	.	0,255,255	77	30.1058	31.4503	36.9143	32.6487	4.98983e-09	1.42996e-05	1.96817e-05	1.96351e-05	1	86170000	86310000	0
G	11	63600000	63620000	11	63700000	63720000	.	.	.	.	0,255,255	77	35.1926	34.5379	37.3077	41.6911	1.59843e-05	1.42996e-05	1.96817e-05	0.0110394	1	63610000	63710000	0
G	11	34200000	34220000	11	34360000	34380000	.	.	.	.	0,255,255	77	30.7859	28.9062	30.6782	35.1661	4.98983e-09	3.20132e-09	4.72142e-09	1.96351e-05	4	34200000	34375000	33541
G	11	19320000	19340000	11	19560000	19580000	.	.	.	.	0,255,255	77	20.2031	17.3586	23.1032	21.1232	2.3395e-13	1.24479e-18	2.45276e-13	2.65339e-13	4	19335000	19555000	25495
G	11	65140000	65160000	11	65280000	65300000	.	.	.	.	0,255,255	75	37.0492	29.3507	33.9766	38.1813	5.06196e-05	1.59865e-08	6.19748e-05	6.1964e-05	2	65140000	65280000	14142
G	11	36300000	36320000	11	36480000	36500000	.	.	.	.	0,255,255	75	30.6458	23.7863	28.6274	38.2845	2.33694e-08	1.07987e-12	2.28366e-08	6.1964e-05	3	36316666	36496666	14907
G	11	35620000	35640000	11	36280000	36300000	.	.	.	.	0,255,255	75	20.192	18.5997	22.3722	27.4442	1.80155e-12	1.47122e-17	1.83976e-12	2.62619e-08	3	35630000	36270000	20000
G	11	73960000	73980000	11	74140000	74160000	.	.	.	.	0,255,255	74	28.9469	25.0896	32.0307	24.5535	5.21203e-08	3.52038e-08	0.000109382	5.34917e-12	2	73980000	74150000	10000
G	11	75600000	75620000	11	75900000	75920000	.	.	.	.	0,255,255	73	27.2366	26.45	40.2536	25.9207	1.10855e-07	7.53725e-08	0.0440327	1.21966e-07	2	75610000	75890000	20000
G	11	74300000	74320000	11	74420000	74440000	.	.	.	.	0,255,255	73	35.7548	32.7963	35.4875	35.5059	0.000149944	0.000137717	0.000186477	0.000186341	2	74310000	74440000	10000
G	11	27720000	27740000	11	27940000	27960000	.	.	.	.	0,255,255	73	28.452	25.1266	30.1967	27.0294	1.10855e-07	7.53725e-08	1.0945e-07	1.21966e-07	1	27730000	27950000	0
G	11	130300000	130320000	11	130500000	130520000	.	.	.	.	0,255,255	72	31.8256	26.7045	33.8846	23.4972	0.000252126	1.59911e-07	0.000317699	3.81044e-11	2	130310000	130520000	10000
G	11	63760000	63780000	11	63900000	63920000	.	.	.	.	0,255,255	72	30.0894	22.2066	20.3016	25.6545	2.3085e-07	2.15474e-11	3.55031e-11	2.52549e-07	4	63780000	63920000	14142
G	11	12060000	12080000	11	12260000	12280000	.	.	.	.	0,255,255	72	36.0998	30.1459	27.1541	46.788	0.000252126	1.59911e-07	2.3245e-07	0.0577178	3	12070000	12290000	20000
G	11	126480000	126500000	11	126580000	126600000	.	.	.	.	0,255,255	71	35.559	33.6315	34.8925	36.4452	0.000415893	0.000398361	0.000535527	0.000531405	2	126470000	126590000	20000
G	11	15120000	15140000	11	15220000	15240000	.	.	.	.	0,255,255	71	26.1885	21.5776	28.5877	25.5067	4.83966e-07	5.644e-11	4.79569e-07	5.28965e-07	3	15116666	15236666	14907
G	11	10820000	10840000	11	10940000	10960000	.	.	.	.	0,255,255	71	27.7115	23.6342	27.6827	24.4451	4.83966e-07	5.644e-11	4.79569e-07	9.53189e-11	1	10830000	10950000	0
G	11	5220000	5240000	11	5380000	5400000	.	.	.	.	0,255,255	70	26.5508	28.5583	30.3076	32.2837	9.75859e-07	6.80942e-07	9.78558e-07	0.000864534	3	5236666	5390000	24037
G	11	124520000	124540000	11	124700000	124720000	.	.	.	.	0,255,255	69	22.6952	19.9928	32.3538	21.0587	5.38377e-10	3.65491e-10	0.00142684	5.85511e-10	1	124530000	124710000	0
G	11	71940000	71960000	11	72120000	72140000	.	.	.	.	0,255,255	69	37.1548	30.0519	30.3447	37.2005	0.00107923	1.40823e-06	1.99939e-06	0.00140825	2	71960000	72130000	10000
G	11	33560000	33580000	11	33700000	33720000	.	.	.	.	0,255,255	69	27.3381	27.3213	30.6165	30.8138	1.99022e-06	1.40823e-06	1.99939e-06	2.14519e-06	1	33570000	33710000	0
G	11	26760000	26780000	11	27140000	27160000	.	.	.	.	0,255,255	69	15.3262	12.9552	16.833	20.1138	1.63209e-18	4.55566e-19	5.88598e-14	5.85511e-10	6	26773333	27163333	37268
G	11	110060000	110080000	11	110240000	110260000	.	.	.	.	0,255,255	68	25.1856	25.1985	26.9753	31.4907	3.92347e-06	2.77938e-06	3.97022e-06	0.0022226	3	110083333	110270000	24037
G	11	100540000	100560000	11	100720000	100740000	.	.	.	.	0,255,255	68	26.4411	28.1193	36.3166	25.4073	3.92347e-06	2.77938e-06	0.00227662	4.27063e-06	1	100550000	100730000	0
G	11	26000000	26020000	11	26240000	26260000	.	.	.	.	0,255,255	68	22.8798	18.9157	26.7406	20.5411	1.30827e-09	5.98122e-14	3.97022e-06	1.44799e-09	6	26006666	26260000	34318
G	11	131780000	131800000	11	131980000	132000000	.	.	.	.	0,255,255	67	26.7453	25.3131	28.8521	33.1464	7.53889e-06	5.41443e-06	7.76416e-06	0.00349546	3	131770000	131990000	20000
G	11	113880000	113900000	11	114100000	114120000	.	.	.	.	0,255,255	67	22.0288	19.904	21.2741	32.0315	3.23989e-09	2.24195e-09	3.33101e-09	0.00349546	5	113882000	114126000	32249
G	11	17740000	17760000	11	17980000	18000000	.	.	.	.	0,255,255	67	22.1725	20.6858	22.3311	26.127	3.23989e-09	2.24195e-09	3.33101e-09	8.29098e-06	5	17766000	17990000	25612
G	11	11820000	11840000	11	11920000	11940000	.	.	.	.	0,255,255	67	34.8742	24.9633	33.3892	36.4761	0.00268268	5.41443e-06	0.0035743	0.00349546	1	11830000	11930000	0
G	11	6260000	6280000	11	6380000	6400000	.	.	.	.	0,255,255	67	33.1804	28.5478	35.6463	34.7334	0.00268268	5.41443e-06	0.0035743	0.00349546	3	6263333	6370000	24037
G	11	130280000	130300000	11	130760000	130780000	.	.	.	.	0,255,255	66	28.6038	16.9755	22.3384	17.7301	1.47347e-05	5.53564e-13	8.13161e-09	1.63378e-12	1	130290000	130770000	0
G	11	103200000	103220000	11	103460000	103480000	.	.	.	.	0,255,255	66	17.5817	18.808	20.3829	25.3106	1.09172e-12	5.53564e-13	8.13161e-09	1.61461e-05	4	103200000	103455000	26926
G	11	68860000	68880000	11	69460000	69480000	.	.	.	.	0,255,255	66	11.6935	7.5825	9.10209	13.5486	2.78003e-21	2.12943e-31	9.668e-26	8.98973e-17	6	68880000	69470000	22361
G	11	19980000	20000000	11	20120000	20140000	.	.	.	.	0,255,255	66	31.2416	28.2164	31.1055	38.8447	0.00411205	1.06205e-05	0.00560357	0.00542433	4	19975000	20130000	20616
G	11	17400000	17420000	11	17500000	17520000	.	.	.	.	0,255,255	66	26.0717	22.7511	28.1856	25.7673	1.47347e-05	5.61576e-09	1.50762e-05	1.61461e-05	3	17410000	17530000	20000
G	11	120380000	120400000	11	120540000	120560000	.	.	.	.	0,255,255	65	27.7748	23.9163	26.083	27.0459	2.79503e-05	1.32405e-08	2.90589e-05	3.06207e-05	2	120380000	120560000	14142
G	11	36580000	36600000	11	36680000	36700000	.	.	.	.	0,255,255	65	30.6526	25.9884	34.8667	22.9417	2.79503e-05	2.04135e-05	0.00852735	2.0316e-08	1	36590000	36690000	0
G	11	34380000	34400000	11	34500000	34520000	.	.	.	.	0,255,255	65	35.333	26.2349	33.5756	29.6416	0.00621962	2.04135e-05	0.00852735	3.06207e-05	2	34390000	34500000	10000
G	11	9200000	9220000	11	9420000	9440000	.	.	.	.	0,255,255	65	27.5453	28.9167	34.8957	35.6555	2.79503e-05	2.04135e-05	0.00852735	0.00829007	1	9210000	9430000	0
G	11	128500000	128520000	11	128680000	128700000	.	.	.	.	0,255,255	64	23.8056	20.8519	20.8432	28.3055	4.21573e-08	3.04283e-08	4.47354e-08	5.7447e-05	1	128510000	128690000	0
G	11	100440000	100460000	11	100800000	100820000	.	.	.	.	0,255,255	64	18.6859	14.7519	15.6809	19.6526	9.17761e-12	3.24659e-16	1.31579e-11	4.63115e-08	2	100450000	100800000	10000
G	11	74720000	74740000	11	74920000	74940000	.	.	.	.	0,255,255	64	25.4907	25.4687	27.0951	33.9765	5.18273e-05	3.92441e-05	5.40182e-05	0.0125312	2	74730000	74920000	10000
G	11	71720000	71740000	11	71880000	71900000	.	.	.	.	0,255,255	64	22.9405	27.2144	35.9411	26.9863	4.21573e-08	3.92441e-05	0.0128088	5.7447e-05	3	71730000	71923333	33333
G	11	19580000	19600000	11	19920000	19940000	.	.	.	.	0,255,255	64	14.852	13.4979	23.8271	16.3176	1.11198e-15	3.24659e-16	4.47354e-08	1.28353e-11	3	19596666	19923333	14908
G	11	44140000	44160000	11	44300000	44320000	.	.	.	.	0,255,255	63	33.8196	28.5538	34.2943	28.7684	0.0137402	7.2824e-05	0.018852	0.000105485	2	44150000	44320000	10000
G	11	3480000	3500000	11	3620000	3640000	.	.	.	.	0,255,255	63	26.891	22.7618	29.7268	20.1495	9.47612e-05	7.08708e-08	9.95566e-05	1.06197e-07	3	3490000	3623333	24037
G	11	101300000	101320000	11	101700000	101720000	.	.	.	.	0,255,255	62	20.6142	17.6252	23.7122	21.1026	2.14684e-07	4.12586e-11	2.35181e-07	2.41778e-07	9	101327777	101710000	40062
G	11	63240000	63260000	11	63380000	63400000	.	.	.	.	0,255,255	62	27.7493	21.6944	27.9283	20.258	0.000171444	1.63532e-07	0.000181994	2.41778e-07	2	63250000	63380000	10000
G	11	16800000	16820000	11	17080000	17100000	.	.	.	.	0,255,255	62	20.4789	14.9789	18.2703	16.9482	2.14684e-07	4.27529e-15	9.80444e-11	1.05134e-10	3	16830000	17083333	21082
G	11	133900000	133920000	11	134000000	134020000	.	.	.	.	0,255,255	61	27.5209	24.6697	25.9853	27.4105	0.000303676	0.000238195	0.000323304	0.000343992	1	133910000	134010000	0
G	11	57100000	57120000	11	57240000	57260000	.	.	.	.	0,255,255	61	22.474	22.4674	32.0174	20.701	4.82819e-07	3.62896e-07	0.039275	5.40841e-07	2	57110000	57260000	10000
G	11	44140000	44160000	11	44540000	44560000	.	.	.	.	0,255,255	61	14.6439	14.0828	20.1432	21.4155	4.94917e-14	1.56449e-14	5.36112e-07	5.40841e-07	9	44127777	44554444	44500
G	11	27300000	27320000	11	27500000	27520000	.	.	.	.	0,255,255	61	23.2105	20.4759	18.9908	30.4856	4.82819e-07	3.62896e-07	2.71741e-10	0.000343992	1	27310000	27510000	0
G	11	123160000	123180000	11	123340000	123360000	.	.	.	.	0,255,255	60	25.5861	24.6043	31.5867	27.3065	0.000530416	0.000422253	0.0554163	0.000602577	2	123150000	123350000	20000
G	11	76900000	76920000	11	77260000	77280000	.	.	.	.	0,255,255	60	19.5896	19.3655	24.6116	26.5778	1.04208e-06	3.2714e-10	0.00056884	0.000602577	10	76898000	77276000	55317
G	11	72620000	72640000	11	72840000	72860000	.	.	.	.	0,255,255	60	29.506	32.3822	30.4378	36.4338	0.000530416	0.0424827	0.00056884	0.0551174	2	72610000	72850000	20000
G	11	64220000	64240000	11	64400000	64420000	.	.	.	.	0,255,255	60	21.2371	23.693	24.1645	26.7548	1.04208e-06	8.05338e-07	1.17483e-06	0.000602577	1	64230000	64410000	0
G	11	57580000	57600000	11	58280000	58300000	.	.	.	.	0,255,255	60	16.1764	14.4953	17.947	24.4067	5.489e-10	5.23514e-14	7.35535e-10	1.16808e-06	5	57570000	58294000	43081
G	11	34580000	34600000	11	34900000	34920000	.	.	.	.	0,255,255	60	18.8425	15.8127	20.3922	23.3711	5.489e-10	3.2714e-10	1.17483e-06	1.16808e-06	10	34592000	34908000	65788
G	11	12360000	12380000	11	12900000	12920000	.	.	.	.	0,255,255	60	18.435	15.0111	20.802	22.4885	5.489e-10	5.23514e-14	1.17483e-06	1.16808e-06	5	12354000	12918000	25298
G	11	4200000	4220000	11	4500000	4520000	.	.	.	.	0,255,255	60	18.1598	15.6924	22.5178	19.4023	5.489e-10	3.2714e-10	1.17483e-06	7.90699e-10	3	4223333	4516666	14908
G	11	126500000	126520000	11	126840000	126860000	.	.	.	.	0,255,255	59	15.5914	17.0282	18.3934	26.5892	1.4912e-09	8.82483e-10	1.98392e-09	0.00103786	4	126495000	126855000	25495
G	11	92660000	92680000	11	92880000	92900000	.	.	.	.	0,255,255	59	26.7203	24.3365	33.9657	26.8876	0.00089721	1.761e-06	0.0767069	0.00103786	4	92675000	92915000	35355
G	11	34940000	34960000	11	35160000	35180000	.	.	.	.	0,255,255	59	28.6431	25.0487	29.3693	31.2542	0.00089721	0.000722236	0.000979146	0.0759507	3	34950000	35190000	20000
G	11	103120000	103140000	11	103460000	103480000	.	.	.	.	0,255,255	58	20.569	19.467	21.4487	29.4805	4.76563e-06	2.36574e-09	5.22829e-06	0.00174852	1	103130000	103470000	0
G	11	34940000	34960000	11	35220000	35240000	.	.	.	.	0,255,255	58	26.9295	20.7632	26.4816	20.3101	0.00147877	3.78235e-06	0.00167462	5.28791e-06	1	34950000	35230000	0
G	11	32700000	32720000	11	32800000	32820000	.	.	.	.	0,255,255	58	26.0334	26.8588	26.219	29.5557	0.00147877	0.00123925	0.00167462	0.00174852	1	32710000	32810000	0
G	11	128980000	129000000	11	129180000	129200000	.	.	.	.	0,255,255	57	18.5439	17.8134	19.2346	24.2324	9.85539e-09	6.28171e-09	1.36405e-08	1.10332e-05	3	129003333	129183333	14907
G	11	128140000	128160000	11	128480000	128500000	.	.	.	.	0,255,255	57	18.9327	21.7228	27.4593	27.4289	9.85539e-09	7.84837e-06	0.00278029	0.00291556	1	128150000	128490000	0
G	11	45140000	45160000	11	45340000	45360000	.	.	.	.	0,255,255	57	22.2569	18.8063	25.1987	22.0687	9.96121e-06	6.28171e-09	0.00278029	1.10332e-05	5	45138000	45326000	37947
G	11	44380000	44400000	11	44520000	44540000	.	.	.	.	0,255,255	57	25.836	23.8631	24.04	29.7789	0.00242818	7.84837e-06	1.08947e-05	0.00291556	1	44390000	44530000	0
G	11	26000000	26020000	11	26160000	26180000	.	.	.	.	0,255,255	57	23.4214	22.7693	29.4458	25.6845	9.96121e-06	7.84837e-06	0.00278029	0.00291556	1	26010000	26170000	0
G	11	127700000	127720000	11	127880000	127900000	.	.	.	.	0,255,255	56	27.3553	24.4857	25.681	21.4705	0.0038976	1.62794e-05	0.00457112	2.22721e-05	1	127710000	127890000	0
G	11	121520000	121540000	11	121960000	121980000	.	.	.	.	0,255,255	56	17.9971	14.234	25.1543	13.6315	2.45818e-08	6.47229e-12	0.00457112	2.0811e-11	3	121530000	121990000	20000
G	11	95560000	95580000	11	96060000	96080000	.	.	.	.	0,255,255	56	14.4581	12.8659	22.3641	15.2102	1.88133e-11	6.47229e-12	2.24859e-05	2.0811e-11	12	95561666	96111666	54823
G	11	94880000	94900000	11	95480000	95500000	.	.	.	.	0,255,255	56	18.0837	13.587	15.5644	21.8695	2.45818e-08	6.47229e-12	3.38837e-08	2.22721e-05	4	94880000	95500000	14142
G	11	129220000	129240000	11	129620000	129640000	.	.	.	.	0,255,255	55	16.2507	12.1926	15.0649	15.019	6.17834e-08	8.41387e-15	7.10083e-11	6.49556e-11	8	129245000	129605000	45277
G	11	128040000	128060000	11	128500000	128520000	.	.	.	.	0,255,255	55	22.7038	20.1693	27.9366	25.4555	4.13568e-05	3.28787e-05	0.00739121	0.0077231	3	128043333	128503333	14907
G	11	124280000	124300000	11	124440000	124460000	.	.	.	.	0,255,255	55	24.8252	19.8729	22.8012	23.6804	0.00626236	3.28787e-05	4.51669e-05	4.50358e-05	3	124283333	124456666	14908
G	11	113180000	113200000	11	113400000	113420000	.	.	.	.	0,255,255	55	27.994	24.7017	29.1483	24.1609	0.00626236	0.00559379	0.00739121	4.50358e-05	2	113180000	113410000	10000
G	11	93620000	93640000	11	94220000	94240000	.	.	.	.	0,255,255	55	17.4095	14.3353	22.1311	16.1087	6.17834e-08	2.09115e-11	4.51669e-05	9.32317e-08	4	93625000	94210000	42720
G	11	82600000	82620000	11	82860000	82880000	.	.	.	.	0,255,255	55	19.1346	18.297	24.969	20.0371	6.17834e-08	4.18345e-08	0.00739121	4.50358e-05	3	82596666	82883333	29815
G	11	44300000	44320000	11	44540000	44560000	.	.	.	.	0,255,255	55	25.8702	21.7417	23.0496	29.1401	0.00626236	3.28787e-05	4.51669e-05	0.0077231	3	44323333	44556666	27488
G	11	121520000	121540000	11	121900000	121920000	.	.	.	.	0,255,255	54	18.2675	15.2668	26.3106	15.2941	1.51756e-07	6.51283e-11	0.0115529	1.98006e-10	1	121530000	121910000	0
G	11	94340000	94360000	11	94620000	94640000	.	.	.	.	0,255,255	54	18.4687	20.0033	30.5776	22.6489	1.51756e-07	6.58375e-05	0.0115529	8.85175e-05	1	94350000	94630000	0
G	11	75600000	75620000	11	76020000	76040000	.	.	.	.	0,255,255	54	15.4586	17.5767	27.9664	18.8769	1.73955e-10	1.04202e-07	0.0115529	2.26734e-07	1	75610000	76030000	0
G	11	27720000	27740000	11	28120000	28140000	.	.	.	.	0,255,255	54	16.507	15.2339	22.7996	16.3736	1.51756e-07	6.51283e-11	8.99009e-05	2.26734e-07	2	27740000	28130000	10000
G	11	10800000	10820000	11	11040000	11060000	.	.	.	.	0,255,255	54	23.2169	15.1428	25.1751	16.0705	8.1495e-05	6.51283e-11	0.0115529	2.26734e-07	1	10810000	11050000	0
G	11	130080000	130100000	11	130280000	130300000	.	.	.	.	0,255,255	53	18.1468	14.1064	20.5481	14.876	3.68728e-07	1.98053e-10	0.000172868	6.11694e-10	2	130080000	130280000	14142
G	11	94340000	94360000	11	94680000	94700000	.	.	.	.	0,255,255	53	18.3904	16.2798	25.6493	20.9494	3.68728e-07	2.53183e-07	0.0180269	0.000171253	2	94350000	94700000	10000
G	11	92680000	92700000	11	92940000	92960000	.	.	.	.	0,255,255	53	17.7373	14.5756	20.4539	14.7619	3.68728e-07	1.98053e-10	0.000172868	6.11694e-10	1	92690000	92950000	0
G	11	87960000	87980000	11	88260000	88280000	.	.	.	.	0,255,255	53	19.7522	18.8969	20.2217	28.3397	0.000153399	2.53183e-07	0.000172868	0.0190987	1	87970000	88270000	0
G	11	78360000	78380000	11	78660000	78680000	.	.	.	.	0,255,255	53	18.6454	18.7018	27.2041	18.5785	3.68728e-07	2.53183e-07	0.0180269	5.42315e-07	1	78370000	78670000	0
G	11	2740000	2760000	11	2880000	2900000	.	.	.	.	0,255,255	53	20.4543	19.5802	15.017	27.0252	0.000153399	0.000128764	6.8584e-10	0.0190987	1	2750000	2890000	0
G	11	113180000	113200000	11	113580000	113600000	.	.	.	.	0,255,255	52	15.5634	14.4052	20.8602	20.639	8.70981e-07	5.97038e-10	0.000323203	0.000323183	7	113190000	113615714	25714
G	11	92960000	92980000	11	93380000	93400000	.	.	.	.	0,255,255	52	15.7327	12.1564	15.825	15.6312	8.70981e-07	4.89651e-13	1.19294e-06	1.27687e-06	5	92974000	93382000	44721
G	11	10420000	10440000	11	10600000	10620000	.	.	.	.	0,255,255	52	23.6008	24.3828	30.8725	23.3013	0.00028488	0.000244104	0.027289	0.000323183	2	10430000	10620000	10000
G	11	4200000	4220000	11	4560000	4580000	.	.	.	.	0,255,255	52	18.3461	13.0179	19.8016	14.5339	8.70981e-07	5.97038e-10	0.000323203	1.83257e-09	1	4210000	4570000	0
G	11	128040000	128060000	11	128700000	128720000	.	.	.	.	0,255,255	51	16.1063	15.8215	20.9262	22.2514	1.99685e-06	1.42248e-06	0.000589075	0.000596162	4	128040000	128700000	14142
G	11	121180000	121200000	11	121460000	121480000	.	.	.	.	0,255,255	51	23.9889	19.9478	22.9976	22.3719	0.000524585	0.000458087	0.000589075	0.000596162	3	121190000	121456666	21082
G	11	113180000	113200000	11	113640000	113660000	.	.	.	.	0,255,255	51	20.3599	15.625	22.5773	16.7405	0.000524585	1.42248e-06	0.000589075	2.92358e-06	1	113190000	113650000	0
G	11	15840000	15860000	11	16620000	16640000	.	.	.	.	0,255,255	51	12.5622	13.2373	13.9962	20.5493	4.38989e-09	1.73056e-09	6.03213e-09	0.000596162	1	15850000	16630000	0
G	11	11040000	11060000	11	11800000	11820000	.	.	.	.	0,255,255	51	15.7124	12.7289	12.8402	18.1985	1.99685e-06	1.73056e-09	6.03213e-09	2.92358e-06	3	11056666	11796666	14907
G	11	8240000	8260000	11	8580000	8600000	.	.	.	.	0,255,255	51	14.3971	12.5858	14.1687	17.9521	4.38989e-09	1.73056e-09	6.03213e-09	2.92358e-06	5	8222000	8578000	42521
G	11	4620000	4640000	11	5020000	5040000	.	.	.	.	0,255,255	51	18.2694	16.2295	17.5717	19.9448	1.99685e-06	1.42248e-06	2.77709e-06	0.000596162	5	4658000	5018000	42521
G	11	129240000	129260000	11	129560000	129580000	.	.	.	.	0,255,255	50	16.812	15.6911	21.4443	19.2519	4.52919e-06	3.25008e-06	0.00107508	6.46841e-06	2	129260000	129570000	10000
G	11	94880000	94900000	11	95420000	95440000	.	.	.	.	0,255,255	50	14.3607	14.7199	17.2036	22.298	1.17599e-08	4.98159e-09	6.1456e-06	0.00108281	1	94890000	95430000	0
G	11	93880000	93900000	11	94140000	94160000	.	.	.	.	0,255,255	50	20.3788	21.1033	23.5673	26.006	0.000950898	0.000843356	0.00107508	0.0619625	5	93902000	94178000	42521
G	11	47200000	47220000	11	47360000	47380000	.	.	.	.	0,255,255	50	23.1072	19.6802	22.3543	22.2114	0.000950898	0.000843356	0.00107508	0.00108281	1	47210000	47370000	0
G	11	22340000	22360000	11	22800000	22820000	.	.	.	.	0,255,255	50	10.9108	8.69415	10.8527	12.1464	1.67444e-11	2.75681e-15	1.80578e-11	1.96398e-11	4	22355000	22810000	20616
G	11	20160000	20180000	11	20360000	20380000	.	.	.	.	0,255,255	50	23.6182	16.0172	16.6425	20.2085	0.000950898	3.25008e-06	6.1456e-06	0.00108281	2	20160000	20380000	14142
G	11	121960000	121980000	11	122360000	122380000	.	.	.	.	0,255,255	49	14.6591	13.9336	12.9691	24.2209	3.23588e-08	1.39651e-08	4.236e-08	0.00193903	1	121970000	122370000	0
G	11	102360000	102380000	11	102520000	102540000	.	.	.	.	0,255,255	49	24.9786	23.9664	25.2619	24.4746	0.0667453	0.00151719	0.0853215	0.00193903	2	102380000	102530000	10000
G	11	35840000	35860000	11	36280000	36300000	.	.	.	.	0,255,255	49	17.794	18.2919	20.8887	24.8211	1.01876e-05	7.45621e-06	0.00192536	0.0879148	2	35850000	36280000	10000
G	11	23120000	23140000	11	23520000	23540000	.	.	.	.	0,255,255	49	14.5815	15.7609	18.4861	17.9845	3.23588e-08	7.45621e-06	1.3523e-05	1.4518e-05	3	23150000	23543333	24037
G	11	4800000	4820000	11	4920000	4940000	.	.	.	.	0,255,255	49	21.9793	26.332	29.5288	25.1964	0.0016728	0.0661072	0.0853215	0.0879148	2	4800000	4940000	14142
G	11	79420000	79440000	11	79860000	79880000	.	.	.	.	0,255,255	48	12.7001	15.3638	16.4779	19.6531	8.40834e-08	3.8396e-08	2.86589e-05	0.0033844	1	79430000	79870000	0
G	11	35500000	35520000	11	36280000	36300000	.	.	.	.	0,255,255	48	17.0626	13.8958	16.0268	19.8465	2.20925e-05	3.8396e-08	2.86589e-05	0.0033844	1	35510000	36290000	0
G	11	17240000	17260000	11	17520000	17540000	.	.	.	.	0,255,255	48	8.13299	8.18619	11.4792	12.5539	1.52773e-13	5.2697e-14	2.0432e-10	1.07259e-07	2	17250000	17540000	10000
G	11	7140000	7160000	11	7440000	7460000	.	.	.	.	0,255,255	48	15.7048	16.1274	21.0226	18.5932	2.20925e-05	1.62498e-05	0.00334899	3.09954e-05	1	7150000	7450000	0
G	11	113760000	113780000	11	114120000	114140000	.	.	.	.	0,255,255	47	15.7569	11.3519	11.1035	21.9875	4.73116e-05	2.42186e-10	6.94172e-10	0.00582285	2	113760000	114140000	14142
G	11	112160000	112180000	11	112320000	112340000	.	.	.	.	0,255,255	47	24.4443	22.1524	24.4012	18.928	0.00482765	0.00458182	0.00573833	6.56083e-05	1	112170000	112330000	0
G	11	106600000	106620000	11	106880000	106900000	.	.	.	.	0,255,255	47	13.2781	15.451	19.5969	17.6313	2.24791e-07	1.04834e-07	0.00573833	6.56083e-05	3	106596666	106896666	14907
G	11	70840000	70860000	11	71020000	71040000	.	.	.	.	0,255,255	47	18.0387	21.101	22.8981	21.602	4.73116e-05	0.00458182	0.00573833	0.00582285	1	70850000	71030000	0
G	11	58920000	58940000	11	59040000	59060000	.	.	.	.	0,255,255	47	24.092	20.988	17.0814	23.5524	0.00482765	0.00458182	6.11853e-05	0.00582285	1	58930000	59050000	0
G	11	8720000	8740000	11	8980000	9000000	.	.	.	.	0,255,255	47	19.0947	16.8403	20.7861	20.7781	4.73116e-05	3.51663e-05	0.00573833	0.00582285	1	8730000	8990000	0
G	11	70300000	70320000	11	70600000	70620000	.	.	.	.	0,255,255	46	15.0615	12.4252	15.7063	12.4757	5.81933e-07	2.78173e-07	0.000127292	7.29688e-07	1	70310000	70610000	0
G	11	57580000	57600000	11	58040000	58060000	.	.	.	.	0,255,255	46	17.2422	14.636	18.0108	15.2046	9.80026e-05	2.78173e-07	0.000127292	7.29688e-07	1	57590000	58050000	0
G	11	56600000	56620000	11	57000000	57020000	.	.	.	.	0,255,255	46	11.9997	9.33459	14.5699	11.7766	1.88345e-09	1.01583e-12	7.70206e-07	2.37974e-09	2	56610000	57020000	10000
G	11	19080000	19100000	11	19320000	19340000	.	.	.	.	0,255,255	46	20.4432	17.6185	23.8513	17.5678	0.00795851	7.4784e-05	0.00961869	0.000136105	1	19090000	19330000	0
G	11	13980000	14000000	11	14260000	14280000	.	.	.	.	0,255,255	46	21.2315	18.4433	21.5058	23.1383	0.00795851	7.4784e-05	0.00961869	0.00974696	2	13980000	14270000	10000
G	11	2540000	2560000	11	2900000	2920000	.	.	.	.	0,255,255	46	11.1595	9.1413	11.3222	14.8899	1.88345e-09	1.01583e-12	2.29261e-09	7.29688e-07	3	2563333	2916666	14908
G	11	121520000	121540000	11	122360000	122380000	.	.	.	.	0,255,255	45	9.85842	11.0992	14.428	16.2764	5.28339e-09	2.54159e-09	1.85669e-06	0.000268835	2	121530000	122380000	10000
G	11	118020000	118040000	11	118220000	118240000	.	.	.	.	0,255,255	45	22.5682	16.7528	17.6393	19.2282	0.0127874	0.000152855	0.000252743	0.000268835	1	118030000	118230000	0
G	11	93000000	93020000	11	93280000	93300000	.	.	.	.	0,255,255	45	16.6513	18.7119	24.524	17.766	0.000197235	0.000152855	0.0157673	0.000268835	1	93010000	93290000	0
G	11	4660000	4680000	11	5000000	5020000	.	.	.	.	0,255,255	44	12.8952	12.5451	14.7862	14.3634	3.55615e-06	1.82292e-06	4.41725e-06	4.39815e-06	1	4670000	5010000	0
G	11	110380000	110400000	11	111100000	111120000	.	.	.	.	0,255,255	43	15.5185	14.0114	14.9935	21.2072	8.36954e-06	4.47835e-06	1.02928e-05	0.0396147	6	110353333	111103333	37268
G	11	107980000	108000000	11	108520000	108540000	.	.	.	.	0,255,255	43	11.6164	8.69786	9.36018	15.7443	4.61576e-08	6.09127e-11	1.94925e-10	0.00101937	2	107980000	108530000	10000
G	11	103620000	103640000	11	104000000	104020000	.	.	.	.	0,255,255	43	11.4002	14.1846	14.5286	19.5463	4.61576e-08	4.47835e-06	1.02928e-05	0.00101937	1	103630000	104010000	0
G	11	35000000	35020000	11	35420000	35440000	.	.	.	.	0,255,255	43	13.513	12.8008	18.4113	18.3832	8.36954e-06	4.47835e-06	0.000954867	0.00101937	1	35010000	35430000	0
G	11	30360000	30380000	11	30920000	30940000	.	.	.	.	0,255,255	43	9.67241	8.96838	9.99642	11.4868	1.3982e-10	6.09127e-11	6.73291e-08	6.80604e-08	4	30375000	30915000	45277
G	11	28720000	28740000	11	29340000	29360000	.	.	.	.	0,255,255	43	12.9872	10.8304	12.9466	17.7018	8.36954e-06	2.36443e-08	1.02928e-05	0.00101937	1	28730000	29350000	0
G	11	93640000	93660000	11	94140000	94160000	.	.	.	.	0,255,255	42	13.8985	14.1668	20.5635	16.9413	1.96447e-05	1.08279e-05	0.0606561	0.00192477	3	93630000	94150000	20000
G	11	89060000	89080000	11	89340000	89360000	.	.	.	.	0,255,255	42	12.4228	12.8861	14.2384	16.5337	1.96447e-05	1.08279e-05	2.47874e-05	0.00192477	1	89070000	89350000	0
G	11	77860000	77880000	11	78260000	78280000	.	.	.	.	0,255,255	42	18.5381	13.9224	14.8058	21.2198	0.00142013	1.08279e-05	2.47874e-05	0.0606015	2	77890000	78270000	20000
G	11	71680000	71700000	11	72120000	72140000	.	.	.	.	0,255,255	42	13.878	12.407	12.5803	21.4733	1.96447e-05	1.08279e-05	2.47874e-05	0.0606015	2	71690000	72110000	20000
G	11	45400000	45420000	11	45780000	45800000	.	.	.	.	0,255,255	42	17.5708	12.8873	18.95	13.4473	0.00142013	1.08279e-05	0.00179882	2.46817e-05	2	45410000	45780000	10000
G	11	12340000	12360000	11	12520000	12540000	.	.	.	.	0,255,255	42	20.7155	19.8739	23.5123	21.3451	0.0469911	0.0486576	0.0606561	0.0606015	2	12350000	12520000	10000
G	11	1720000	1740000	11	2020000	2040000	.	.	.	.	0,255,255	42	12.5843	15.3401	21.0785	17.9609	1.96447e-05	1.08279e-05	0.0606561	0.00192477	2	1720000	2030000	10000
G	11	130920000	130940000	11	131540000	131560000	.	.	.	.	0,255,255	41	13.1091	11.0785	16.3169	12.9763	4.37473e-05	2.02978e-07	0.00332372	5.7195e-05	4	130920000	131530000	41231
G	11	108000000	108020000	11	108460000	108480000	.	.	.	.	0,255,255	41	14.0553	14.2764	15.8512	16.3167	4.37473e-05	2.57519e-05	0.00332372	0.00353111	1	108010000	108470000	0
G	11	88280000	88300000	11	88620000	88640000	.	.	.	.	0,255,255	41	14.8328	12.9034	14.142	14.0644	4.37473e-05	2.57519e-05	5.54908e-05	5.7195e-05	1	88290000	88630000	0
G	11	44940000	44960000	11	45300000	45320000	.	.	.	.	0,255,255	41	11.6022	11.5254	16.8625	15.2418	3.67119e-07	2.02978e-07	0.00332372	5.7195e-05	2	44950000	45320000	10000
G	11	27720000	27740000	11	29340000	29360000	.	.	.	.	0,255,255	41	9.21547	7.94387	9.99837	12.4522	1.84416e-09	7.82675e-10	5.19666e-07	5.7195e-05	2	27720000	29350000	10000
G	11	19100000	19120000	11	19560000	19580000	.	.	.	.	0,255,255	41	11.2828	10.1453	12.3955	15.7061	3.67119e-07	2.02978e-07	5.54908e-05	0.00353111	3	19096666	19563333	14908
G	11	2040000	2060000	11	2160000	2180000	.	.	.	.	0,255,255	41	17.4988	14.3456	12.9666	21.192	0.00261485	2.57519e-05	5.54908e-05	0.0904169	2	2060000	2170000	10000
G	11	128160000	128180000	11	128700000	128720000	.	.	.	.	0,255,255	40	10.4983	12.7522	12.5419	19.0562	9.87901e-07	5.92051e-05	0.000121738	0.006275	1	128170000	128710000	0
G	11	122960000	122980000	11	123360000	123380000	.	.	.	.	0,255,255	40	14.3525	11.6898	17.5346	15.303	9.61479e-05	5.72177e-07	0.00600568	0.000124889	4	122965000	123350000	20616
G	11	121580000	121600000	11	121860000	121880000	.	.	.	.	0,255,255	40	15.421	17.9161	18.5629	18.7525	9.61479e-05	0.00408138	0.00600568	0.006275	1	121590000	121870000	0
G	11	114200000	114220000	11	114620000	114640000	.	.	.	.	0,255,255	40	10.877	10.2703	12.6432	12.9008	9.87901e-07	5.72177e-07	0.000121738	0.000124889	2	114200000	114630000	10000
G	11	103540000	103560000	11	104040000	104060000	.	.	.	.	0,255,255	40	11.227	9.74491	14.4077	10.4238	9.87901e-07	2.71963e-09	0.000121738	1.42612e-06	3	103550000	104030000	20000
G	11	2200000	2220000	11	2440000	2460000	.	.	.	.	0,255,255	40	14.1293	13.7933	19.062	16.8481	9.61479e-05	5.92051e-05	0.00600568	0.006275	3	2216666	2436666	14907
G	11	83040000	83060000	11	83420000	83440000	.	.	.	.	0,255,255	39	11.6323	12.4377	14.984	15.3922	2.67194e-06	0.000132649	0.000261891	0.000269024	1	83050000	83430000	0
G	11	83000000	83020000	11	83520000	83540000	.	.	.	.	0,255,255	39	16.4403	12.0296	16.1794	13.1386	0.00811595	1.56981e-06	0.0106154	0.000269024	2	83010000	83520000	10000
G	11	70800000	70820000	11	71120000	71140000	.	.	.	.	0,255,255	39	12.3719	11.4254	12.7853	13.2139	2.67194e-06	1.56981e-06	0.000261891	0.000269024	1	70810000	71130000	0
G	11	26300000	26320000	11	26660000	26680000	.	.	.	.	0,255,255	39	14.7518	11.6203	14.2369	13.1048	0.000204354	1.56981e-06	0.000261891	0.000269024	1	26310000	26670000	0
G	11	6040000	6060000	11	6340000	6360000	.	.	.	.	0,255,255	39	14.8936	12.9155	15.449	15.2489	0.000204354	0.000132649	0.000261891	0.000269024	3	6043333	6336666	14908
G	11	119520000	119540000	11	119960000	119980000	.	.	.	.	0,255,255	38	13.6655	13.5757	15.6817	18.952	0.000420835	0.000288967	0.0181262	0.0186876	4	119535000	119975000	25495
G	11	112460000	112480000	11	113140000	113160000	.	.	.	.	0,255,255	38	9.92412	8.94352	10.9199	12.8003	6.93499e-06	3.29852e-08	9.39715e-06	0.000568928	1	112470000	113150000	0
G	11	110580000	110600000	11	111080000	111100000	.	.	.	.	0,255,255	38	12.6838	14.1313	15.5021	19.3333	0.000420835	0.000288967	0.000546816	0.0186876	1	110590000	111090000	0
G	11	82940000	82960000	11	83520000	83540000	.	.	.	.	0,255,255	38	17.2162	11.1535	9.02671	13.7102	0.0137721	4.20506e-06	9.21594e-08	0.000568928	1	82950000	83530000	0
G	11	124820000	124840000	11	125280000	125300000	.	.	.	.	0,255,255	37	11.9348	10.4277	13.0345	15.2302	1.7205e-05	1.08263e-05	0.00111313	0.0011733	2	124830000	125300000	10000
G	11	44640000	44660000	11	45120000	45140000	.	.	.	.	0,255,255	37	8.98832	9.49606	12.2841	10.8135	1.94703e-07	1.04619e-07	2.27931e-05	2.39628e-05	1	44650000	45130000	0
G	11	121900000	121920000	11	122360000	122380000	.	.	.	.	0,255,255	36	10.0893	10.7433	10.3742	18.7389	4.1741e-05	2.73749e-05	5.38428e-05	0.049841	2	121900000	122370000	10000
G	11	88820000	88840000	11	89340000	89360000	.	.	.	.	0,255,255	36	8.52416	8.79391	10.9851	11.4845	5.87805e-07	3.30057e-07	5.38428e-05	5.85598e-05	1	88830000	89350000	0
G	11	87580000	87600000	11	88260000	88280000	.	.	.	.	0,255,255	34	8.29054	9.05826	9.30237	13.4456	4.92004e-06	3.07394e-06	7.24739e-06	0.00826397	2	87590000	88280000	10000
G	11	84500000	84520000	11	85300000	85320000	.	.	.	.	0,255,255	34	10.6217	9.42468	11.9367	10.7421	0.000222697	3.07394e-06	0.000292538	0.000313899	1	84510000	85310000	0
G	11	83000000	83020000	11	83440000	83460000	.	.	.	.	0,255,255	34	11.8083	10.8059	15.0687	13.598	0.000222697	0.000160078	0.0079321	0.00826397	1	83010000	83450000	0
G	11	41480000	41500000	11	42540000	42560000	.	.	.	.	0,255,255	34	11.0397	10.894	13.9838	13.8506	0.000222697	0.000160078	0.0079321	0.00826397	3	41510000	42550000	20000
G	11	10860000	10880000	11	11800000	11820000	.	.	.	.	0,255,255	34	9.70071	8.65421	8.63141	12.4102	4.92004e-06	3.07394e-06	7.24739e-06	0.00826397	2	10850000	11810000	20000
G	11	7120000	7140000	11	7700000	7720000	.	.	.	.	0,255,255	34	8.21539	10.2718	13.4487	12.9374	4.92004e-06	0.000160078	0.0079321	0.00826397	1	7130000	7710000	0
G	11	114140000	114160000	11	114620000	114640000	.	.	.	.	0,255,255	33	9.1288	8.20147	10.3056	9.76082	1.33619e-05	8.7976e-06	0.000641389	1.99885e-05	2	114150000	114610000	20000
G	11	87060000	87080000	11	87360000	87380000	.	.	.	.	0,255,255	33	11.1305	10.6145	14.6562	12.1472	0.000488567	0.000365593	0.0142996	0.000681913	1	87070000	87370000	0
G	11	33180000	33200000	11	33740000	33760000	.	.	.	.	0,255,255	33	10.2971	8.91655	9.88916	13.2978	0.000488567	8.7976e-06	0.000641389	0.0149253	1	33190000	33750000	0
G	11	87120000	87140000	11	88260000	88280000	.	.	.	.	0,255,255	32	7.71991	9.08341	11.2165	10.889	6.72015e-07	2.48889e-05	0.00137869	0.00145027	1	87130000	88270000	0
G	11	83540000	83560000	11	84220000	84240000	.	.	.	.	0,255,255	32	10.3052	8.93745	12.3341	12.0122	0.00104296	2.48889e-05	0.00137869	0.00145027	3	83550000	84250000	20000
G	11	59580000	59600000	11	59940000	59960000	.	.	.	.	0,255,255	32	12.1994	10.5709	10.3542	12.1961	0.00104296	0.000821786	0.00137869	0.00145027	2	59600000	59940000	14142
G	11	23120000	23140000	11	24400000	24420000	.	.	.	.	0,255,255	32	7.83853	10.1204	11.3109	11.5506	3.65068e-05	0.000821786	0.00137869	0.00145027	1	23130000	24410000	0
G	11	45920000	45940000	11	46300000	46320000	.	.	.	.	0,255,255	31	12.1344	9.84083	10.5715	12.2007	0.00214366	6.68908e-05	0.00285147	0.00300365	1	45930000	46310000	0
G	11	69500000	69520000	11	70020000	70040000	.	.	.	.	0,255,255	30	11.9607	8.25606	12.3193	12.2622	0.00420595	0.000170239	0.00563215	0.00603059	1	69510000	70030000	0
G	11	38020000	38040000	11	38560000	38580000	.	.	.	.	0,255,255	30	9.54294	12.7863	12.2293	12.876	0.000226592	0.0478471	0.00563215	0.0721752	2	38020000	38580000	14142
G	11	112200000	112220000	11	113140000	113160000	.	.	.	.	0,255,255	29	7.95453	7.0526	7.22186	11.4456	0.000537055	1.49159e-05	2.7827e-05	0.0116507	1	112210000	113150000	0
G	11	32340000	32360000	11	32800000	32820000	.	.	.	.	0,255,255	29	11.0633	8.56757	10.0444	11.5661	0.00800599	0.000414028	0.0108805	0.0116507	2	32350000	32800000	10000
G	11	130060000	130080000	11	130760000	130780000	.	.	.	.	0,255,255	28	7.3608	6.90646	7.9494	11.0105	5.93932e-05	4.59852e-05	0.00163764	0.0218705	3	130076666	130750000	21082
G	11	112140000	112160000	11	113140000	113160000	.	.	.	.	0,255,255	27	8.97945	6.86029	6.70614	11.2605	0.00262357	0.000129915	0.000223215	0.0387801	2	112150000	113130000	20000
G	11	87060000	87080000	11	88280000	88300000	.	.	.	.	0,255,255	27	11.1689	8.68627	10.1563	10.6753	0.0260795	0.00223305	0.0359919	0.0387801	2	87070000	88280000	10000
G	11	70320000	70340000	11	71080000	71100000	.	.	.	.	0,255,255	27	4.5098	5.11096	7.26338	6.28882	8.13737e-08	4.73567e-06	0.000223215	0.000217417	1	70330000	71090000	0
G	11	125460000	125480000	11	126060000	126080000	.	.	.	.	0,255,255	26	6.90686	6.60666	8.23845	8.9668	0.000419913	0.000346284	0.00754183	0.00791229	1	125470000	126070000	0
G	11	26300000	26320000	11	27160000	27180000	.	.	.	.	0,255,255	26	6.60757	5.35019	6.46875	7.73688	0.000419913	1.67028e-05	0.000582106	0.000579433	3	26323333	27163333	27488
G	11	131720000	131740000	11	132840000	132860000	.	.	.	.	0,255,255	25	4.97084	6.66942	8.06897	7.82897	6.17391e-05	0.000907121	0.0150571	0.00146635	1	131730000	132850000	0
G	11	125320000	125340000	11	125700000	125720000	.	.	.	.	0,255,255	25	7.67178	7.63744	6.91546	9.3328	0.00104481	0.000907121	0.00148692	0.0156209	1	125330000	125710000	0
G	11	96180000	96200000	11	98880000	98900000	.	.	.	.	0,255,255	25	3.74058	2.4706	5.12553	2.64686	2.59656e-08	3.66793e-12	9.62434e-05	5.53508e-10	2	96190000	98880000	10000
G	11	19940000	19960000	11	20380000	20400000	.	.	.	.	0,255,255	25	2.82513	3.68959	4.20332	8.4586	2.39886e-10	3.47813e-08	2.46511e-06	0.0156209	3	19963333	20370000	24037
G	11	17020000	17040000	11	17500000	17520000	.	.	.	.	0,255,255	25	4.88235	5.54403	5.59636	6.78545	1.49886e-06	5.57657e-05	9.62434e-05	0.00146635	1	17030000	17510000	0
G	11	123960000	123980000	11	124480000	124500000	.	.	.	.	0,255,255	24	6.96245	6.32476	7.05024	5.54154	0.00237187	0.00218627	0.00347037	0.000284893	1	123970000	124490000	0
G	11	26340000	26360000	11	27140000	27160000	.	.	.	.	0,255,255	23	4.50574	4.40324	5.11828	6.17572	2.34809e-05	2.80067e-05	0.000796119	0.000825864	1	26350000	27150000	0
G	11	25980000	26000000	11	26660000	26680000	.	.	.	.	0,255,255	23	5.05323	4.95778	5.8584	5.08005	0.000496366	2.80067e-05	0.000796119	0.000825864	1	25990000	26670000	0
G	11	48340000	48360000	11	50040000	50060000	.	.	.	.	0,255,255	21	6.0526	4.95866	6.62614	5.0663	0.00327184	0.000365501	0.0324674	0.00540901	4	48370000	50030000	28284
G	11	92040000	92060000	11	93400000	93420000	.	.	.	.	0,255,255	19	3.01264	3.11292	3.30286	3.50569	1.07181e-05	2.09459e-05	0.00044626	0.000525383	1	92050000	93410000	0
G	11	88480000	88500000	11	89380000	89400000	.	.	.	.	0,255,255	19	3.66613	4.39762	3.83575	4.83911	0.000250587	0.00327682	0.00044626	0.00515382	1	88490000	89390000	0
G	11	61520000	61540000	11	62140000	62160000	.	.	.	.	0,255,255	19	4.61045	3.87452	4.30317	3.83104	0.00258961	0.000340114	0.00430491	0.000525383	1	61530000	62150000	0
G	11	46760000	46780000	11	47760000	47780000	.	.	.	.	0,255,255	17	3.75135	3.03466	3.4276	2.43075	0.00264227	0.000509769	0.0052935	4.05519e-05	1	46770000	47770000	0
G	11	18560000	18580000	11	20040000	20060000	.	.	.	.	0,255,255	15	2.36435	2.49497	2.40025	3.09765	0.000451173	0.000934802	0.00113524	0.00744351	1	18570000	20050000	0
G	12	49740000	49760000	12	49900000	49920000	.	.	.	.	0,255,255	131	52.4414	46.7805	48.8817	53.1873	1.31894e-11	4.6019e-18	3.68066e-11	6.52625e-11	7	49724285	49918571	62727
G	12	57140000	57160000	12	57380000	57400000	.	.	.	.	0,255,255	123	42.1093	31.1413	35.0852	36.3281	7.53726e-15	8.04576e-22	6.61408e-22	1.5933e-21	6	57160000	57376666	40138
G	12	540000	560000	12	640000	660000	.	.	.	.	0,255,255	122	53.9065	34.4694	41.0179	44.4507	4.03683e-09	1.79207e-21	2.39839e-14	1.64421e-14	1	550000	650000	0
G	12	54420000	54440000	12	54580000	54600000	.	.	.	.	0,255,255	120	43.3522	32.3206	40.3433	41.6795	6.46413e-14	1.0615e-20	1.07244e-13	8.49508e-14	7	54410000	54590000	28284
G	12	50600000	50620000	12	50700000	50720000	.	.	.	.	0,255,255	119	48.4548	48.8302	55.1317	50.822	1.35884e-13	1.13985e-13	6.51286e-08	8.50911e-08	3	50590000	50710000	20000
G	12	1760000	1780000	12	1880000	1900000	.	.	.	.	0,255,255	119	52.9661	37.3029	39.0928	43.2492	2.07453e-08	2.83847e-20	2.24265e-13	1.82334e-13	3	1770000	1890000	20000
G	12	64220000	64240000	12	64640000	64660000	.	.	.	.	0,255,255	114	21.8943	17.1605	29.6605	19.2758	7.705e-33	0	3.59972e-25	0	5	64230000	64642000	32000
G	12	123120000	123140000	12	123220000	123240000	.	.	.	.	0,255,255	108	51.5775	45.7272	52.5863	54.8788	7.03337e-06	4.44785e-10	2.08541e-05	2.11296e-05	4	123120000	123240000	14142
G	12	110940000	110960000	12	111040000	111060000	.	.	.	.	0,255,255	108	44.0735	38.4863	44.6984	40.007	3.93893e-10	9.16199e-16	6.62966e-10	6.48716e-10	1	110950000	111050000	0
G	12	69780000	69800000	12	69920000	69940000	.	.	.	.	0,255,255	107	28.738	34.3421	52.8478	34.2481	1.12808e-21	2.30559e-15	3.28889e-05	4.46332e-15	4	69785000	69955000	25495
G	12	122120000	122140000	12	122220000	122240000	.	.	.	.	0,255,255	106	52.7707	39.1095	41.897	43.616	1.92176e-05	1.8185e-09	2.65458e-09	2.60672e-09	1	122130000	122230000	0
G	12	62980000	63000000	12	63180000	63200000	.	.	.	.	0,255,255	106	40.3237	32.7618	41.4882	41.3384	1.58807e-09	5.51904e-15	2.65458e-09	2.60672e-09	4	62995000	63185000	25495
G	12	12520000	12540000	12	12840000	12860000	.	.	.	.	0,255,255	105	26.975	22.7122	33.8973	27.4339	1.04945e-20	4.33814e-28	1.82613e-14	8.50922e-21	5	12522000	12842000	32985
G	12	57700000	57720000	12	57800000	57820000	.	.	.	.	0,255,255	104	51.4711	54.9363	53.6388	59.5454	4.74767e-05	0.000222814	0.000130352	0.00013932	6	57690000	57836666	33333
G	12	31540000	31560000	12	31780000	31800000	.	.	.	.	0,255,255	102	29.156	20.8211	25.266	27.8387	2.7356e-19	2.11492e-26	2.31884e-19	2.36596e-19	6	31563333	31783333	47141
G	12	14400000	14420000	12	14500000	14520000	.	.	.	.	0,255,255	102	38.8288	39.9014	44.317	38.6496	2.40622e-13	2.70389e-08	4.01045e-08	2.75015e-13	3	14403333	14510000	24037
G	12	10180000	10200000	12	10280000	10300000	.	.	.	.	0,255,255	101	42.6038	36.4366	43.2782	40.6598	4.16958e-08	4.3682e-13	7.47704e-08	7.53804e-08	1	10190000	10290000	0
G	12	111980000	112000000	12	112080000	112100000	.	.	.	.	0,255,255	100	49.0902	46.8374	44.8818	56.414	0.000276692	1.03939e-07	1.36433e-07	0.000777344	2	111970000	112090000	20000
G	12	4960000	4980000	12	5100000	5120000	.	.	.	.	0,255,255	100	34.31	33.863	32.2565	30.3891	1.21908e-12	9.84283e-13	1.30618e-12	2.04371e-18	4	4975000	5105000	25495
G	12	56740000	56760000	12	56840000	56860000	.	.	.	.	0,255,255	98	51.0921	38.9212	39.0364	51.5634	0.000607477	3.59332e-07	4.66075e-07	0.0016728	1	56750000	56850000	0
G	12	15000000	15020000	12	15140000	15160000	.	.	.	.	0,255,255	97	32.518	32.7873	31.776	39.6693	1.43368e-11	1.11245e-11	1.46903e-11	7.8504e-07	2	15000000	15150000	10000
G	12	121760000	121780000	12	121860000	121880000	.	.	.	.	0,255,255	96	37.9736	34.846	41.5554	38.4509	3.1391e-11	2.4666e-11	1.46298e-06	3.59804e-11	3	121763333	121876666	14908
G	12	27680000	27700000	12	27780000	27800000	.	.	.	.	0,255,255	95	44.889	41.4238	44.7795	46.6124	1.42994e-06	2.0306e-06	2.57362e-06	2.4455e-06	1	27690000	27790000	0
G	12	13240000	13260000	12	13360000	13380000	.	.	.	.	0,255,255	95	53.8327	42.8498	44.9099	49.2801	0.00185028	2.0306e-06	2.57362e-06	0.00550579	2	13250000	13360000	10000
G	12	125060000	125080000	12	125160000	125180000	.	.	.	.	0,255,255	94	44.5506	50.7888	51.3552	48.3441	2.49029e-06	0.00840311	0.00661894	4.2358e-06	1	125070000	125170000	0
G	12	42520000	42540000	12	42720000	42740000	.	.	.	.	0,255,255	94	24.686	25.0921	29.614	29.7526	1.09138e-15	5.58982e-16	9.56808e-16	1.05403e-15	2	42520000	42730000	10000
G	12	15420000	15440000	12	15660000	15680000	.	.	.	.	0,255,255	94	27.5188	22.9823	26.896	25.7229	1.09138e-15	5.65543e-22	9.56808e-16	1.05403e-15	5	15422000	15674000	32249
G	12	64940000	64960000	12	65080000	65100000	.	.	.	.	0,255,255	93	37.5234	36.2835	40.0117	54.0677	3.18435e-10	2.6554e-10	7.9073e-06	0.0107075	4	64945000	65095000	35355
G	12	58200000	58220000	12	58300000	58320000	.	.	.	.	0,255,255	92	39.7176	25.0119	28.8765	33.0182	7.27053e-06	4.14384e-15	6.78521e-15	8.46675e-10	2	58200000	58310000	10000
G	12	124280000	124300000	12	124460000	124480000	.	.	.	.	0,255,255	91	29.2174	29.8753	33.3358	38.0054	2.09691e-14	1.11567e-14	1.67747e-09	1.83835e-09	3	124283333	124483333	27488
G	12	77000000	77020000	12	77180000	77200000	.	.	.	.	0,255,255	91	29.3684	24.9525	31.21	26.2714	2.09691e-14	1.11567e-14	1.67747e-09	2.01251e-14	5	77014000	77186000	33941
G	12	50880000	50900000	12	51020000	51040000	.	.	.	.	0,255,255	91	44.3658	41.6804	56.0007	46.9648	1.21658e-05	1.77783e-05	0.0180626	2.08938e-05	3	50903333	51023333	14907
G	12	53940000	53960000	12	54060000	54080000	.	.	.	.	0,255,255	89	43.2533	36.8497	50.0669	40.0297	3.30882e-05	5.34669e-09	0.0337043	5.89229e-05	3	53950000	54070000	20000
G	12	93960000	93980000	12	94480000	94500000	.	.	.	.	0,255,255	88	17.8813	16.6231	19.1942	30.8253	2.17171e-24	5.66087e-25	2.56155e-24	3.54416e-13	10	93928000	94492000	42048
G	12	105600000	105620000	12	105740000	105760000	.	.	.	.	0,255,255	87	40.0058	35.3597	34.8836	43.0574	8.65078e-05	2.25838e-08	3.11128e-08	0.000152161	5	105614000	105758000	32249
G	12	96440000	96460000	12	96600000	96620000	.	.	.	.	0,255,255	87	35.052	25.3559	26.3781	20.706	2.75055e-08	5.22644e-13	8.11379e-13	5.02146e-18	5	96454000	96610000	25612
G	12	45600000	45620000	12	45780000	45800000	.	.	.	.	0,255,255	87	34.257	34.235	39.193	41.1289	2.75055e-08	2.25838e-08	0.000162833	0.000152161	6	45586666	45786666	23571
G	12	15740000	15760000	12	16000000	16020000	.	.	.	.	0,255,255	87	25.3554	20.3229	25.8419	25.7538	9.00033e-13	2.43208e-18	8.11379e-13	9.08633e-13	7	15727142	16010000	42184
G	12	680000	700000	12	840000	860000	.	.	.	.	0,255,255	87	37.0523	33.679	44.4263	42.4375	2.75055e-08	2.25838e-08	0.000162833	0.000152161	1	690000	850000	0
G	12	107520000	107540000	12	108000000	108020000	.	.	.	.	0,255,255	85	16.1147	11.3991	16.0163	14.2881	1.05796e-22	1.60936e-35	1.29987e-22	7.98481e-29	8	107530000	108002500	34004
G	12	117140000	117160000	12	117320000	117340000	.	.	.	.	0,255,255	84	32.2319	27.5332	28.7636	30.8341	2.14398e-07	7.96484e-12	1.21665e-11	1.39001e-11	1	117150000	117330000	0
G	12	77020000	77040000	12	77140000	77160000	.	.	.	.	0,255,255	84	38.0849	39.6336	46.1523	40.6946	2.14398e-07	0.000541609	0.00063773	0.000611679	1	77030000	77150000	0
G	12	93960000	93980000	12	94120000	94140000	.	.	.	.	0,255,255	83	42.0721	38.9854	40.0294	44.6092	0.000529795	0.000856957	0.00100583	0.000938999	1	93970000	94130000	0
G	12	93380000	93400000	12	93780000	93800000	.	.	.	.	0,255,255	82	23.0327	19.3981	21.4905	34.3531	1.22379e-15	1.93943e-21	1.36199e-15	9.45706e-07	8	93397500	93795000	41003
G	12	13140000	13160000	12	13360000	13380000	.	.	.	.	0,255,255	82	24.4718	22.8864	21.4838	46.9962	1.22379e-15	6.60266e-16	1.36199e-15	0.00145581	3	13163333	13376666	14908
G	12	89740000	89760000	12	89840000	89860000	.	.	.	.	0,255,255	81	29.424	20.4787	25.537	24.5912	1.79317e-10	2.01071e-15	1.69838e-10	1.95598e-10	1	89750000	89850000	0
G	12	3240000	3260000	12	3380000	3400000	.	.	.	.	0,255,255	81	23.9905	19.6434	24.3839	26.4304	3.70719e-15	2.01071e-15	4.00934e-15	1.95598e-10	2	3250000	3380000	10000
G	12	124520000	124540000	12	124800000	124820000	.	.	.	.	0,255,255	80	25.2911	17.4135	23.0064	20.3497	4.1331e-10	2.73846e-20	1.09469e-14	1.13478e-14	7	124541428	124798571	44447
G	12	104760000	104780000	12	105260000	105280000	.	.	.	.	0,255,255	80	18.7116	18.4813	30.9809	20.4914	7.28395e-20	2.73846e-20	3.26017e-06	1.13478e-14	2	104770000	105280000	10000
G	12	95960000	95980000	12	96200000	96220000	.	.	.	.	0,255,255	80	30.537	22.2633	27.7923	28.5079	4.1331e-10	5.77069e-15	3.93559e-10	4.52278e-10	5	95982000	96222000	30463
G	12	70980000	71000000	12	71120000	71140000	.	.	.	.	0,255,255	80	35.0718	26.7677	33.1453	23.3429	2.7694e-06	2.63615e-10	3.26017e-06	1.13478e-14	4	70995000	71110000	20616
G	12	69280000	69300000	12	69460000	69480000	.	.	.	.	0,255,255	80	34.0574	33.1483	41.5512	33.763	2.7694e-06	2.39752e-06	0.00361061	3.3723e-06	5	69270000	69470000	28284
G	12	25160000	25180000	12	25260000	25280000	.	.	.	.	0,255,255	78	29.6578	32.4207	38.2374	34.5703	2.18812e-09	8.06024e-06	1.08232e-05	1.12914e-05	4	25145000	25275000	25495
G	12	121920000	121940000	12	122100000	122120000	.	.	.	.	0,255,255	77	42.1177	33.7057	33.8299	46.7193	0.00618751	1.42996e-05	1.96817e-05	0.0110394	1	121930000	122110000	0
G	12	56120000	56140000	12	56320000	56340000	.	.	.	.	0,255,255	77	25.7391	23.5486	25.811	36.5271	4.98983e-09	1.40247e-13	4.72142e-09	1.96351e-05	3	56143333	56350000	24037
G	12	44160000	44180000	12	44260000	44280000	.	.	.	.	0,255,255	76	34.8219	31.6598	36.5792	38.0675	2.86164e-05	2.55369e-05	3.49341e-05	3.48203e-05	2	44180000	44280000	14142
G	12	9960000	9980000	12	10060000	10080000	.	.	.	.	0,255,255	76	28.6361	37.9957	36.7054	36.1759	1.07891e-08	2.55369e-05	3.49341e-05	3.48203e-05	2	9970000	10080000	10000
G	12	123320000	123340000	12	123440000	123460000	.	.	.	.	0,255,255	75	36.6587	32.0011	30.8249	37.1301	5.06196e-05	4.58973e-05	2.28366e-08	6.1964e-05	2	123340000	123450000	10000
G	12	115120000	115140000	12	116180000	116200000	.	.	.	.	0,255,255	75	12.7921	17.212	21.2452	19.1114	4.11816e-22	1.47122e-17	1.83976e-12	5.44791e-17	2	115120000	116190000	10000
G	12	89440000	89460000	12	89840000	89860000	.	.	.	.	0,255,255	75	17.0849	14.3747	27.02	15.8929	3.64138e-17	1.16502e-22	2.28366e-08	5.44791e-17	8	89435000	89882500	53677
G	12	68600000	68620000	12	68700000	68720000	.	.	.	.	0,255,255	75	35.0809	27.7042	29.9421	33.4918	5.06196e-05	1.59865e-08	2.28366e-08	6.1964e-05	1	68610000	68710000	0
G	12	11720000	11740000	12	12180000	12200000	.	.	.	.	0,255,255	75	19.0253	13.7498	21.5258	19.2176	3.64138e-17	1.16502e-22	1.83976e-12	5.44791e-17	11	11731818	12175454	44276
G	12	6160000	6180000	12	6380000	6400000	.	.	.	.	0,255,255	75	22.4916	19.2608	30.8258	22.8438	1.80155e-12	1.47122e-17	2.28366e-08	1.99703e-12	3	6176666	6383333	14908
G	12	109040000	109060000	12	109160000	109180000	.	.	.	.	0,255,255	74	35.5151	33.2462	41.4418	33.0711	8.80744e-05	8.02951e-05	0.0323255	0.00010795	2	109050000	109180000	10000
G	12	94140000	94160000	12	94480000	94500000	.	.	.	.	0,255,255	74	23.2934	19.5908	20.5308	33.685	4.7821e-12	2.98989e-12	5.10582e-12	0.00010795	3	94176666	94490000	33334
G	12	47060000	47080000	12	47300000	47320000	.	.	.	.	0,255,255	74	32.2997	34.4052	41.3794	43.6312	8.80744e-05	8.02951e-05	0.0323255	0.03101	3	47083333	47336666	33994
G	12	118620000	118640000	12	118800000	118820000	.	.	.	.	0,255,255	73	27.0264	21.2157	23.4988	26.2945	1.10855e-07	8.18194e-12	1.39018e-11	1.21966e-07	4	118625000	118815000	25495
G	12	110020000	110040000	12	110200000	110220000	.	.	.	.	0,255,255	73	26.8355	24.7936	27.1947	33.7499	1.10855e-07	7.53725e-08	1.0945e-07	0.000186341	2	110040000	110210000	10000
G	12	51220000	51240000	12	51380000	51400000	.	.	.	.	0,255,255	73	29.9335	30.2129	34.1324	32.7392	1.10855e-07	7.53725e-08	0.000186477	0.000186341	3	51223333	51403333	14907
G	12	54160000	54180000	12	54340000	54360000	.	.	.	.	0,255,255	72	31.3833	26.5959	29.6542	31.2025	0.000252126	1.59911e-07	2.3245e-07	0.000317573	5	54170000	54370000	20000
G	12	47420000	47440000	12	47700000	47720000	.	.	.	.	0,255,255	72	26.0935	23.2564	30.9594	25.1872	2.3085e-07	2.15474e-11	0.000317699	2.52549e-07	4	47435000	47740000	50249
G	12	27180000	27200000	12	27440000	27460000	.	.	.	.	0,255,255	72	26.4513	27.7251	33.6342	38.252	2.3085e-07	1.59911e-07	0.000317699	0.000317573	3	27176666	27450000	21082
G	12	10920000	10940000	12	11340000	11360000	.	.	.	.	0,255,255	72	18.705	16.2707	21.2351	19.9202	1.30239e-15	5.79882e-16	3.55031e-11	3.81044e-11	8	10935000	11357500	37165
G	12	89440000	89460000	12	89720000	89740000	.	.	.	.	0,255,255	71	21.0297	19.3325	32.5387	19.5808	8.43544e-11	1.84099e-15	0.000535527	9.53189e-11	1	89450000	89730000	0
G	12	21840000	21860000	12	22140000	22160000	.	.	.	.	0,255,255	71	19.5205	17.6218	20.737	24.1268	3.94962e-15	1.84099e-15	9.07043e-11	9.53189e-11	6	21856666	22140000	30732
G	12	8260000	8280000	12	8380000	8400000	.	.	.	.	0,255,255	71	32.3303	28.6828	35.933	37.9102	0.000415893	3.34276e-07	0.000535527	0.000531405	1	8270000	8390000	0
G	12	1220000	1240000	12	1680000	1700000	.	.	.	.	0,255,255	71	20.21	16.1761	19.2779	25.512	8.43544e-11	1.84099e-15	5.71235e-15	5.28965e-07	5	1226000	1682000	32249
G	12	75920000	75940000	12	76420000	76440000	.	.	.	.	0,255,255	70	20.17	14.6848	20.845	21.1719	2.14992e-10	1.19834e-19	2.31133e-10	2.34402e-10	5	75934000	76438000	25298
G	12	68040000	68060000	12	68320000	68340000	.	.	.	.	0,255,255	70	24.0276	22.8464	25.3691	27.6111	2.14992e-10	1.43986e-10	9.78558e-07	1.07425e-06	2	68050000	68320000	10000
G	12	63200000	63220000	12	63440000	63460000	.	.	.	.	0,255,255	70	22.6608	18.1308	21.9798	27.0654	2.14992e-10	5.94143e-15	2.31133e-10	1.07425e-06	5	63210000	63454000	25612
G	12	56880000	56900000	12	56980000	57000000	.	.	.	.	0,255,255	70	29.6366	20.6616	24.6466	24.1355	9.75859e-07	1.43986e-10	9.78558e-07	2.34402e-10	1	56890000	56990000	0
G	12	55140000	55160000	12	55340000	55360000	.	.	.	.	0,255,255	70	16.9565	18.5917	22.3473	21.6041	1.24185e-14	5.94143e-15	2.31133e-10	2.34402e-10	3	55136666	55343333	14908
G	12	114420000	114440000	12	114940000	114960000	.	.	.	.	0,255,255	69	14.4589	15.006	28.6429	19.3191	1.63209e-18	4.55566e-19	1.99939e-06	6.06905e-14	7	114435714	114987142	67914
G	12	27560000	27580000	12	27780000	27800000	.	.	.	.	0,255,255	69	22.3046	21.5161	23.7239	34.7581	5.38377e-10	3.65491e-10	5.61729e-10	0.00140825	4	27570000	27795000	35000
G	12	58740000	58760000	12	58920000	58940000	.	.	.	.	0,255,255	68	30.9865	25.9974	30.3864	31.4908	0.00171434	2.77938e-06	3.97022e-06	0.0022226	1	58750000	58930000	0
G	12	54640000	54660000	12	54740000	54760000	.	.	.	.	0,255,255	68	32.0895	28.326	31.0767	34.0054	0.00171434	2.77938e-06	0.00227662	0.0022226	2	54630000	54750000	20000
G	12	52760000	52780000	12	53260000	53280000	.	.	.	.	0,255,255	68	16.276	15.1591	19.4691	20.3378	1.178e-13	1.70991e-18	1.75473e-13	1.44799e-09	4	52770000	53260000	22361
G	12	25400000	25420000	12	25520000	25540000	.	.	.	.	0,255,255	68	29.0421	26.346	29.5815	30.8954	3.92347e-06	2.77938e-06	3.97022e-06	4.27063e-06	4	25390000	25540000	22361
G	12	80440000	80460000	12	80560000	80580000	.	.	.	.	0,255,255	67	36.3296	31.9668	34.1962	36.5104	0.00268268	0.00268616	0.0035743	0.00349546	1	80450000	80570000	0
G	12	52540000	52560000	12	52700000	52720000	.	.	.	.	0,255,255	67	29.8545	26.2798	33.2255	36.4635	7.53889e-06	5.41443e-06	0.0035743	0.00349546	1	52550000	52710000	0
G	12	79820000	79840000	12	79920000	79940000	.	.	.	.	0,255,255	66	37.4038	26.2899	28.8173	34.8933	0.00411205	1.06205e-05	1.50762e-05	0.00542433	1	79830000	79930000	0
G	12	42980000	43000000	12	43120000	43140000	.	.	.	.	0,255,255	66	32.5996	32.4713	38.0832	31.3641	0.00411205	0.00416413	0.00560357	0.00542433	2	42990000	43140000	10000
G	12	5280000	5300000	12	5540000	5560000	.	.	.	.	0,255,255	66	25.8977	26.9311	28.6709	30.8038	1.47347e-05	1.06205e-05	1.50762e-05	1.61461e-05	3	5290000	5543333	24037
G	12	1320000	1340000	12	1440000	1460000	.	.	.	.	0,255,255	66	30.4308	34.3092	35.4305	34.7247	1.47347e-05	0.00416413	0.00560357	0.00542433	1	1330000	1450000	0
G	12	124860000	124880000	12	125240000	125260000	.	.	.	.	0,255,255	65	18.5138	16.0815	20.409	24.5094	3.2375e-12	1.69685e-12	1.92342e-08	2.0316e-08	4	124865000	125255000	25495
G	12	95500000	95520000	12	95600000	95620000	.	.	.	.	0,255,255	65	29.5279	30.1348	35.6	35.5583	2.79503e-05	2.04135e-05	0.00852735	0.00829007	1	95510000	95610000	0
G	12	76480000	76500000	12	76720000	76740000	.	.	.	.	0,255,255	65	32.023	29.7337	34.8455	36.9447	0.00621962	2.04135e-05	0.00852735	0.00829007	4	76465000	76735000	25495
G	12	68720000	68740000	12	69000000	69020000	.	.	.	.	0,255,255	65	26.2883	26.6653	33.3503	32.5219	2.79503e-05	2.04135e-05	0.00852735	0.00829007	5	68742000	69030000	23324
G	12	48460000	48480000	12	48560000	48580000	.	.	.	.	0,255,255	65	33.1111	25.4954	27.4386	29.968	0.00621962	2.04135e-05	2.90589e-05	3.06207e-05	1	48470000	48570000	0
G	12	32200000	32220000	12	32440000	32460000	.	.	.	.	0,255,255	65	27.7333	25.4033	25.5015	32.7347	2.79503e-05	2.04135e-05	2.90589e-05	0.00829007	6	32223333	32463333	29814
G	12	11380000	11400000	12	11580000	11600000	.	.	.	.	0,255,255	65	24.6962	22.5791	26.4462	22.9897	2.79503e-05	1.32405e-08	2.90589e-05	2.0316e-08	5	11374000	11630000	43081
G	12	7360000	7380000	12	7780000	7800000	.	.	.	.	0,255,255	65	16.6976	14.119	22.0454	18.1265	3.2375e-12	9.19857e-17	1.92342e-08	4.64213e-12	8	7380000	7785000	33541
G	12	5200000	5220000	12	5540000	5560000	.	.	.	.	0,255,255	65	23.0925	23.6616	27.279	30.4347	1.87314e-08	1.32405e-08	2.90589e-05	3.06207e-05	2	5210000	5560000	10000
G	12	127580000	127600000	12	127760000	127780000	.	.	.	.	0,255,255	64	22.1973	21.2093	23.6606	24.1243	4.21573e-08	3.04283e-08	4.47354e-08	4.63115e-08	2	127590000	127790000	20000
G	12	118300000	118320000	12	118440000	118460000	.	.	.	.	0,255,255	64	35.9343	26.8362	30.7587	26.0944	0.00934579	3.92441e-05	5.40182e-05	5.7447e-05	1	118310000	118450000	0
G	12	106760000	106780000	12	107300000	107320000	.	.	.	.	0,255,255	64	19.132	14.2395	20.2485	20.6974	9.17761e-12	3.24659e-16	4.47354e-08	4.63115e-08	6	106790000	107303333	33333
G	12	94540000	94560000	12	94820000	94840000	.	.	.	.	0,255,255	64	19.4878	18.3073	32.4811	19.351	9.17761e-12	4.99846e-12	0.0128088	1.28353e-11	1	94550000	94830000	0
G	12	94520000	94540000	12	94920000	94940000	.	.	.	.	0,255,255	64	17.5852	11.3747	19.8204	10.9357	9.17761e-12	2.08614e-20	4.47354e-08	1.39778e-19	4	94525000	94925000	25495
G	12	91360000	91380000	12	91720000	91740000	.	.	.	.	0,255,255	64	16.2312	11.9496	18.9719	19.1977	9.17761e-12	2.08614e-20	1.31579e-11	1.28353e-11	9	91367777	91725555	35624
G	12	50480000	50500000	12	50700000	50720000	.	.	.	.	0,255,255	64	24.2713	23.912	27.6893	34.1893	4.21573e-08	3.04283e-08	5.40182e-05	0.0125312	1	50490000	50710000	0
G	12	7820000	7840000	12	7940000	7960000	.	.	.	.	0,255,255	64	26.5125	21.8623	25.0149	22.8916	5.18273e-05	3.04283e-08	5.40182e-05	4.63115e-08	1	7830000	7950000	0
G	12	124920000	124940000	12	125240000	125260000	.	.	.	.	0,255,255	63	24.2779	22.7742	20.5516	35.0886	9.58217e-08	7.08708e-08	1.01913e-07	0.0186416	1	124930000	125250000	0
G	12	93520000	93540000	12	93780000	93800000	.	.	.	.	0,255,255	63	21.6165	20.6993	19.6486	33.4223	9.58217e-08	7.08708e-08	1.01913e-07	0.0186416	1	93530000	93790000	0
G	12	70280000	70300000	12	70960000	70980000	.	.	.	.	0,255,255	63	16.7155	17.6318	26.6719	19.2541	2.60403e-11	1.43702e-11	9.95566e-05	3.69274e-11	4	70290000	70960000	22361
G	12	47060000	47080000	12	47400000	47420000	.	.	.	.	0,255,255	63	24.6666	21.7767	27.8392	23.1134	9.47612e-05	7.08708e-08	9.95566e-05	1.06197e-07	1	47070000	47410000	0
G	12	31020000	31040000	12	31120000	31140000	.	.	.	.	0,255,255	63	22.584	21.4953	25.7522	24.5428	9.58217e-08	7.08708e-08	9.95566e-05	1.06197e-07	1	31030000	31130000	0
G	12	8820000	8840000	12	9040000	9060000	.	.	.	.	0,255,255	63	21.7797	23.6048	29.656	23.2012	9.58217e-08	7.08708e-08	9.95566e-05	1.06197e-07	3	8823333	9043333	14907
G	12	109940000	109960000	12	110200000	110220000	.	.	.	.	0,255,255	62	20.3509	17.0573	17.4661	27.0761	2.14684e-07	4.12586e-11	9.80444e-11	0.000191484	1	109950000	110210000	0
G	12	81220000	81240000	12	81320000	81340000	.	.	.	.	0,255,255	62	26.9186	25.1194	24.7397	29.8259	0.000171444	0.000131809	0.000181994	0.000191484	1	81230000	81330000	0
G	12	79940000	79960000	12	80120000	80140000	.	.	.	.	0,255,255	62	29.196	26.251	31.8515	31.683	0.000171444	0.000131809	0.027468	0.0269583	2	79950000	80150000	20000
G	12	12240000	12260000	12	12440000	12460000	.	.	.	.	0,255,255	62	30.9816	29.9539	35.8097	32.6657	0.0197795	0.000131809	0.027468	0.0269583	4	12240000	12475000	36401
G	12	6180000	6200000	12	6300000	6320000	.	.	.	.	0,255,255	62	32.5272	30.1072	37.6297	22.2149	0.0197795	0.000131809	0.027468	2.41778e-07	3	6183333	6296666	14908
G	12	103320000	103340000	12	103940000	103960000	.	.	.	.	0,255,255	61	18.5874	15.467	20.7796	18.9817	2.06693e-10	1.56449e-14	5.36112e-07	2.93325e-10	8	103322500	103927500	52559
G	12	91560000	91580000	12	91720000	91740000	.	.	.	.	0,255,255	61	25.7767	21.3419	20.6035	32.892	0.000303676	3.62896e-07	5.36112e-07	0.0386557	4	91560000	91740000	14142
G	12	89400000	89420000	12	89880000	89900000	.	.	.	.	0,255,255	61	19.8146	12.8067	17.0869	16.051	4.82819e-07	1.56449e-14	2.71741e-10	2.93325e-10	3	89410000	89890000	20000
G	12	14380000	14400000	12	14760000	14780000	.	.	.	.	0,255,255	61	12.1317	13.2952	21.5425	14.989	5.74883e-18	1.56449e-14	5.36112e-07	5.74556e-14	2	14390000	14780000	10000
G	12	12220000	12240000	12	12480000	12500000	.	.	.	.	0,255,255	61	30.487	22.3709	25.3458	27.5084	0.000303676	3.62896e-07	0.000323304	0.000343992	1	12230000	12490000	0
G	12	113900000	113920000	12	114340000	114360000	.	.	.	.	0,255,255	60	15.5448	12.744	16.7268	17.7812	1.64448e-13	5.23514e-14	7.35535e-10	7.90699e-10	7	113890000	114350000	28284
G	12	100620000	100640000	12	100720000	100740000	.	.	.	.	0,255,255	60	22.1631	24.8891	26.9473	28.0472	1.04208e-06	0.000422253	0.00056884	0.000602577	1	100630000	100730000	0
G	12	68720000	68740000	12	69060000	69080000	.	.	.	.	0,255,255	60	21.2117	19.3836	27.0648	21.6585	1.04208e-06	3.2714e-10	0.00056884	1.16808e-06	1	68730000	69070000	0
G	12	10920000	10940000	12	11640000	11660000	.	.	.	.	0,255,255	60	11.9004	8.64477	12.5197	14.0998	2.33513e-17	5.00175e-22	2.13495e-13	1.855e-13	5	10934000	11642000	25298
G	12	3980000	4000000	12	4140000	4160000	.	.	.	.	0,255,255	60	30.0393	29.2896	30.085	27.8161	0.000530416	0.000422253	0.00056884	0.000602577	1	3990000	4150000	0
G	12	85960000	85980000	12	86240000	86260000	.	.	.	.	0,255,255	59	18.4917	21.2535	20.9432	31.7326	1.4912e-09	1.761e-06	2.48327e-06	0.0759507	2	85970000	86260000	10000
G	12	85860000	85880000	12	86260000	86280000	.	.	.	.	0,255,255	59	16.6134	13.9009	15.6791	19.9863	1.4912e-09	1.81436e-13	1.98392e-09	2.50733e-06	5	85870000	86270000	40000
G	12	52960000	52980000	12	53260000	53280000	.	.	.	.	0,255,255	59	24.1816	20.7356	22.5689	22.6075	2.22887e-06	1.761e-06	2.48327e-06	2.50733e-06	3	52983333	53263333	14907
G	12	25980000	26000000	12	26100000	26120000	.	.	.	.	0,255,255	59	31.8666	29.3054	31.3111	33.3953	0.0552656	0.000722236	0.0767069	0.0759507	3	25983333	26136666	27487
G	12	62820000	62840000	12	63180000	63200000	.	.	.	.	0,255,255	58	16.1665	15.7402	15.0636	28.55	3.85443e-09	2.36574e-09	2.26637e-12	0.00174852	1	62830000	63190000	0
G	12	50340000	50360000	12	50440000	50460000	.	.	.	.	0,255,255	58	27.6115	23.4652	24.1486	28.4945	0.00147877	3.78235e-06	5.22829e-06	0.00174852	1	50350000	50450000	0
G	12	40160000	40180000	12	40380000	40400000	.	.	.	.	0,255,255	58	16.881	17.8596	23.455	18.0093	3.85443e-09	2.36574e-09	5.22829e-06	5.79592e-09	1	40170000	40390000	0
G	12	32900000	32920000	12	34160000	34180000	.	.	.	.	0,255,255	58	12.634	7.46651	9.53949	10.9914	1.8658e-12	7.4849e-25	3.58816e-20	4.8523e-16	6	32933333	34156666	26874
G	12	31800000	31820000	12	32460000	32480000	.	.	.	.	0,255,255	58	10.2578	9.78908	15.0903	13.3337	3.77895e-16	9.91667e-21	2.26637e-12	1.99269e-12	6	31826666	32466666	23571
G	12	121040000	121060000	12	121400000	121420000	.	.	.	.	0,255,255	57	15.8712	14.9304	19.0623	20.2948	9.85539e-09	2.03845e-12	1.36405e-08	1.10332e-05	3	121043333	121396666	14908
G	12	117800000	117820000	12	118260000	118280000	.	.	.	.	0,255,255	57	10.0452	12.1695	13.3683	18.7497	1.61014e-15	5.90369e-16	7.57123e-12	1.47676e-08	4	117800000	118280000	14142
G	12	100740000	100760000	12	100940000	100960000	.	.	.	.	0,255,255	57	29.3554	23.6782	24.8356	28.8922	0.00242818	7.84837e-06	0.00278029	0.00291556	1	100750000	100950000	0
G	12	63200000	63220000	12	63300000	63320000	.	.	.	.	0,255,255	57	26.8732	25.7303	26.2627	28.485	0.00242818	0.00207994	0.00278029	0.00291556	1	63210000	63310000	0
G	12	51440000	51460000	12	51720000	51740000	.	.	.	.	0,255,255	57	25.7914	22.1504	24.9361	29.8947	0.00242818	7.84837e-06	0.00278029	0.00291556	3	51436666	51736666	14907
G	12	46760000	46780000	12	46940000	46960000	.	.	.	.	0,255,255	57	20.4619	20.3461	28.5876	20.9841	9.96121e-06	7.84837e-06	0.00278029	1.10332e-05	1	46770000	46950000	0
G	12	40540000	40560000	12	40700000	40720000	.	.	.	.	0,255,255	57	17.0807	17.4596	22.4474	17.3547	9.85539e-09	6.28171e-09	1.08947e-05	1.47676e-08	1	40550000	40710000	0
G	12	102860000	102880000	12	103120000	103140000	.	.	.	.	0,255,255	56	27.2434	23.7053	23.238	29.398	0.0038976	1.62794e-05	2.24859e-05	0.00478933	1	102870000	103130000	0
G	12	96600000	96620000	12	96800000	96820000	.	.	.	.	0,255,255	56	30.5288	27.0652	26.9167	26.8415	0.0038976	0.00341246	0.00457112	0.00478933	1	96610000	96810000	0
G	12	85260000	85280000	12	85420000	85440000	.	.	.	.	0,255,255	56	26.9496	19.6704	24.8128	19.9848	0.0038976	1.62794e-05	0.00457112	2.22721e-05	4	85275000	85430000	20616
G	12	80800000	80820000	12	81160000	81180000	.	.	.	.	0,255,255	56	15.993	17.0902	22.3493	21.7139	2.45818e-08	1.63668e-08	2.24859e-05	2.22721e-05	2	80810000	81160000	10000
G	12	42980000	43000000	12	43640000	43660000	.	.	.	.	0,255,255	56	16.9784	20.2918	24.1213	27.1642	2.45818e-08	1.62794e-05	2.24859e-05	0.00478933	4	42975000	43685000	45277
G	12	6520000	6540000	12	6640000	6660000	.	.	.	.	0,255,255	56	27.413	25.198	27.5864	28.7219	0.0038976	0.00341246	0.00457112	0.00478933	2	6530000	6660000	10000
G	12	2160000	2180000	12	2680000	2700000	.	.	.	.	0,255,255	56	12.7838	13.7532	16.1911	21.6557	1.88133e-11	6.47229e-12	3.38837e-08	2.22721e-05	5	2166000	2686000	36222
G	12	1760000	1780000	12	2040000	2060000	.	.	.	.	0,255,255	56	10.9691	11.1244	18.4661	14.3457	6.35441e-15	2.32989e-15	3.38837e-08	2.0811e-11	2	1760000	2050000	10000
G	12	123780000	123800000	12	124100000	124120000	.	.	.	.	0,255,255	55	21.6846	16.0917	19.0606	20.0975	4.13568e-05	4.18345e-08	8.48411e-08	4.50358e-05	6	123796666	124093333	33500
G	12	115080000	115100000	12	116340000	116360000	.	.	.	.	0,255,255	55	16.011	13.4701	22.5084	17.1607	6.17834e-08	2.09115e-11	4.51669e-05	9.32317e-08	10	115086000	116362000	37947
G	12	110520000	110540000	12	110860000	110880000	.	.	.	.	0,255,255	55	20.0192	16.3628	24.0953	17.4117	4.13568e-05	4.18345e-08	4.51669e-05	9.32317e-08	1	110530000	110870000	0
G	12	85000000	85020000	12	85220000	85240000	.	.	.	.	0,255,255	55	21.6547	20.2801	20.3104	28.2735	4.13568e-05	3.28787e-05	4.51669e-05	0.0077231	1	85010000	85230000	0
G	12	44340000	44360000	12	45320000	45340000	.	.	.	.	0,255,255	55	15.8385	10.6388	12.0694	15.2974	6.17834e-08	8.41387e-15	2.73207e-14	6.49556e-11	5	44378000	45318000	32985
G	12	3980000	4000000	12	4380000	4400000	.	.	.	.	0,255,255	55	16.2782	13.3451	15.6956	19.7286	6.17834e-08	2.09115e-11	8.48411e-08	4.50358e-05	1	3990000	4390000	0
G	12	105800000	105820000	12	106540000	106560000	.	.	.	.	0,255,255	54	18.392	14.2696	23.5098	17.2132	1.51756e-07	6.51283e-11	8.99009e-05	2.26734e-07	5	105822000	106550000	40792
G	12	59320000	59340000	12	59460000	59480000	.	.	.	.	0,255,255	54	26.1609	24.7691	27.7013	29.2362	0.00969876	0.00882043	0.0115529	0.012299	5	59306000	59478000	25298
G	12	52540000	52560000	12	53260000	53280000	.	.	.	.	0,255,255	54	7.73717	11.3263	15.0369	14.6853	6.80345e-22	3.24284e-14	2.23168e-10	1.98006e-10	5	52546000	53278000	25298
G	12	46540000	46560000	12	46740000	46760000	.	.	.	.	0,255,255	54	21.9079	18.853	22.8116	21.0278	8.1495e-05	1.04202e-07	8.99009e-05	8.85175e-05	1	46550000	46750000	0
G	12	109560000	109580000	12	109800000	109820000	.	.	.	.	0,255,255	53	19.6526	17.3037	19.636	21.1479	0.000153399	2.53183e-07	0.000172868	0.000171253	3	109576666	109823333	14908
G	12	104600000	104620000	12	104700000	104720000	.	.	.	.	0,255,255	53	29.2597	23.3777	28.807	23.6202	0.0149326	0.000128764	0.0180269	0.000171253	2	104600000	104710000	10000
G	12	29220000	29240000	12	29440000	29460000	.	.	.	.	0,255,255	53	22.3746	20.199	25.5494	22.2722	0.000153399	0.000128764	0.0180269	0.000171253	2	29230000	29460000	10000
G	12	11780000	11800000	12	12180000	12200000	.	.	.	.	0,255,255	53	16.9104	17.21	21.7627	28.3153	3.68728e-07	2.53183e-07	0.000172868	0.0190987	1	11790000	12190000	0
G	12	117660000	117680000	12	118300000	118320000	.	.	.	.	0,255,255	52	22.2021	15.4956	19.5584	21.0522	0.00028488	5.97038e-10	1.19294e-06	0.000323183	5	117666000	118298000	25298
G	12	6720000	6740000	12	6880000	6900000	.	.	.	.	0,255,255	52	23.3747	24.2216	29.9824	23.8283	0.00028488	0.000244104	0.027289	0.000323183	2	6730000	6910000	20000
G	12	77540000	77560000	12	78080000	78100000	.	.	.	.	0,255,255	51	13.1228	13.875	18.2562	19.6973	4.38989e-09	1.73056e-09	2.77709e-06	0.000596162	3	77536666	78090000	21082
G	12	65980000	66000000	12	66220000	66240000	.	.	.	.	0,255,255	51	17.0385	20.1389	22.136	21.074	1.99685e-06	0.000458087	0.000589075	0.000596162	2	65990000	66240000	10000
G	12	65700000	65720000	12	66100000	66120000	.	.	.	.	0,255,255	51	16.1249	15.9259	25.9967	17.8909	1.99685e-06	1.42248e-06	0.0409719	2.92358e-06	2	65710000	66100000	10000
G	12	51820000	51840000	12	52200000	52220000	.	.	.	.	0,255,255	51	18.4235	15.8403	20.5513	21.0421	1.99685e-06	1.42248e-06	0.000589075	0.000596162	4	51825000	52230000	40311
G	12	46760000	46780000	12	47060000	47080000	.	.	.	.	0,255,255	51	22.8141	21.0758	28.997	24.4256	0.000524585	0.000458087	0.0409719	0.000596162	2	46760000	47070000	10000
G	12	26260000	26280000	12	26800000	26820000	.	.	.	.	0,255,255	51	15.3818	14.7359	20.9318	20.0228	4.38989e-09	1.73056e-09	0.000589075	0.000596162	5	26262000	26794000	25298
G	12	10440000	10460000	12	10680000	10700000	.	.	.	.	0,255,255	51	19.0091	21.9502	24.1704	27.3132	1.99685e-06	0.000458087	0.000589075	0.0425935	5	10418000	10694000	52154
G	12	131400000	131420000	12	131600000	131620000	.	.	.	.	0,255,255	50	19.5028	17.4496	16.6215	17.4315	4.52919e-06	3.25008e-06	6.1456e-06	6.46841e-06	4	131400000	131600000	14142
G	12	107520000	107540000	12	107780000	107800000	.	.	.	.	0,255,255	50	20.3359	18.7679	23.9952	19.8216	0.000950898	3.25008e-06	0.00107508	0.00108281	1	107530000	107790000	0
G	12	106760000	106780000	12	107240000	107260000	.	.	.	.	0,255,255	50	17.743	16.2424	21.8081	19.3147	4.52919e-06	3.25008e-06	0.00107508	6.46841e-06	3	106776666	107236666	14907
G	12	102520000	102540000	12	102860000	102880000	.	.	.	.	0,255,255	50	19.818	22.1522	26.646	28.6002	0.000950898	0.000843356	0.0594793	0.0619625	2	102510000	102870000	20000
G	12	101220000	101240000	12	101700000	101720000	.	.	.	.	0,255,255	50	14.9753	13.1443	15.7248	16.3207	1.17599e-08	4.98159e-09	6.1456e-06	6.46841e-06	5	101238000	101686000	54406
G	12	75720000	75740000	12	75880000	75900000	.	.	.	.	0,255,255	50	23.7837	15.5655	15.7409	20.2105	0.000950898	3.25008e-06	6.1456e-06	0.00108281	2	75730000	75880000	10000
G	12	70280000	70300000	12	70600000	70620000	.	.	.	.	0,255,255	50	20.0638	18.6918	25.0946	19.0364	0.000950898	3.25008e-06	0.0594793	6.46841e-06	2	70290000	70620000	10000
G	12	6720000	6740000	12	6940000	6960000	.	.	.	.	0,255,255	50	18.6834	15.755	20.8492	19.7999	4.52919e-06	3.25008e-06	0.00107508	0.00108281	1	6730000	6950000	0
G	12	88980000	89000000	12	89360000	89380000	.	.	.	.	0,255,255	49	21.8597	18.4138	18.0756	30.1597	0.0016728	7.45621e-06	1.3523e-05	0.0879148	4	88990000	89385000	20616
G	12	88520000	88540000	12	89360000	89380000	.	.	.	.	0,255,255	49	15.3221	11.0571	17.4507	14.8042	3.23588e-08	2.18859e-11	1.3523e-05	4.0091e-08	7	88538571	89370000	41601
G	12	64060000	64080000	12	64180000	64200000	.	.	.	.	0,255,255	49	21.3327	17.3339	16.6075	24.4709	0.0016728	7.45621e-06	1.3523e-05	0.00193903	2	64050000	64190000	20000
G	12	59800000	59820000	12	60180000	60200000	.	.	.	.	0,255,255	49	12.3357	13.8995	21.5488	17.5523	5.73456e-11	1.39651e-08	0.00192536	1.4518e-05	2	59820000	60190000	10000
G	12	43180000	43200000	12	43660000	43680000	.	.	.	.	0,255,255	49	17.2247	17.5642	16.3204	23.5316	1.01876e-05	7.45621e-06	1.3523e-05	0.00193903	1	43190000	43670000	0
G	12	22480000	22500000	12	22580000	22600000	.	.	.	.	0,255,255	49	23.7616	20.8614	19.9946	24.0884	0.0016728	0.00151719	0.00192536	0.00193903	1	22490000	22590000	0
G	12	22260000	22280000	12	22480000	22500000	.	.	.	.	0,255,255	49	17.4246	21.7346	27.4613	24.4206	1.01876e-05	0.00151719	0.0853215	0.00193903	2	22250000	22490000	20000
G	12	10380000	10400000	12	10700000	10720000	.	.	.	.	0,255,255	49	16.2117	14.7175	17.1921	21.6941	1.01876e-05	1.39651e-08	1.3523e-05	0.00193903	2	10390000	10730000	20000
G	12	115120000	115140000	12	115580000	115600000	.	.	.	.	0,255,255	48	14.1541	13.5394	21.4448	15.631	8.40834e-08	3.8396e-08	0.00334899	3.09954e-05	4	115115000	115590000	20616
G	12	96960000	96980000	12	97700000	97720000	.	.	.	.	0,255,255	48	10.9674	8.16389	14.402	10.1057	1.68646e-10	5.2697e-14	1.10766e-07	2.28816e-10	4	96980000	97710000	22361
G	12	96440000	96460000	12	96900000	96920000	.	.	.	.	0,255,255	48	8.06144	8.10145	10.2966	16.1002	1.52773e-13	5.2697e-14	2.0432e-10	3.09954e-05	3	96456666	96903333	14908
G	12	88500000	88520000	12	89400000	89420000	.	.	.	.	0,255,255	48	17.712	10.2492	13.4217	11.476	2.20925e-05	7.27803e-11	1.10766e-07	2.28816e-10	1	88510000	89410000	0
G	12	67740000	67760000	12	68040000	68060000	.	.	.	.	0,255,255	48	17.0535	14.7601	18.023	15.9792	2.20925e-05	3.8396e-08	2.86589e-05	3.09954e-05	2	67760000	68050000	10000
G	12	105820000	105840000	12	106480000	106500000	.	.	.	.	0,255,255	47	13.9739	14.3412	24.3694	14.6596	2.24791e-07	1.04834e-07	0.00573833	2.82774e-07	1	105830000	106490000	0
G	12	103260000	103280000	12	103940000	103960000	.	.	.	.	0,255,255	47	21.8545	15.0491	16.0233	19.587	0.00482765	1.04834e-07	6.11853e-05	0.00582285	1	103270000	103950000	0
G	12	42880000	42900000	12	43720000	43740000	.	.	.	.	0,255,255	47	20.8087	14.436	15.7655	20.4945	0.00482765	1.04834e-07	6.11853e-05	0.00582285	2	42880000	43730000	10000
G	12	32500000	32520000	12	32820000	32840000	.	.	.	.	0,255,255	47	24.0869	16.9501	18.3621	24.4545	0.00482765	3.51663e-05	6.11853e-05	0.00582285	2	32520000	32830000	10000
G	12	111460000	111480000	12	111740000	111760000	.	.	.	.	0,255,255	46	17.7884	15.2238	15.4281	18.6434	9.80026e-05	2.78173e-07	7.70206e-07	0.000136105	1	111470000	111750000	0
G	12	91760000	91780000	12	92960000	92980000	.	.	.	.	0,255,255	46	16.1942	12.2084	17.603	13.9164	9.80026e-05	8.14754e-10	0.000127292	7.29688e-07	3	91776666	92983333	27488
G	12	53480000	53500000	12	53680000	53700000	.	.	.	.	0,255,255	46	20.6783	17.7703	18.2318	21.8636	0.00795851	7.4784e-05	0.000127292	0.00974696	1	53490000	53690000	0
G	12	104760000	104780000	12	105460000	105480000	.	.	.	.	0,255,255	45	15.9481	13.1211	19.9272	14.8512	0.000197235	7.21584e-07	0.0157673	1.78501e-06	2	104760000	105460000	14142
G	12	64220000	64240000	12	64780000	64800000	.	.	.	.	0,255,255	45	10.6672	11.5803	23.2015	12.3554	5.28339e-09	2.54159e-09	0.0157673	7.6973e-09	2	64220000	64790000	10000
G	12	48600000	48620000	12	49000000	49020000	.	.	.	.	0,255,255	45	16.4636	12.4702	14.9166	14.744	0.000197235	7.21584e-07	1.85669e-06	1.78501e-06	2	48610000	49020000	10000
G	12	14860000	14880000	12	15140000	15160000	.	.	.	.	0,255,255	45	15.8625	15.6121	15.6133	22.8354	0.000197235	0.000152855	0.000252743	0.0160173	1	14870000	15150000	0
G	12	9460000	9480000	12	9560000	9580000	.	.	.	.	0,255,255	45	19.2878	18.4826	20.5555	16.3869	0.000197235	0.000152855	0.0157673	0.000268835	1	9470000	9570000	0
G	12	2380000	2400000	12	2680000	2700000	.	.	.	.	0,255,255	45	19.4452	18.1479	15.7741	24.2013	0.000197235	0.000152855	0.000252743	0.0160173	1	2390000	2690000	0
G	12	131400000	131420000	12	132260000	132280000	.	.	.	.	0,255,255	44	11.1499	12.4656	13.2198	15.5143	1.59107e-08	1.82292e-06	4.41725e-06	4.39815e-06	2	131410000	132290000	20000
G	12	118840000	118860000	12	119460000	119480000	.	.	.	.	0,255,255	44	14.7937	11.8765	16.7166	14.2162	3.55615e-06	7.81674e-09	0.000497374	4.39815e-06	1	118850000	119470000	0
G	12	115800000	115820000	12	116180000	116200000	.	.	.	.	0,255,255	44	16.4336	17.3734	17.7693	21.3579	0.000390762	0.000310716	0.000497374	0.0255239	2	115800000	116190000	10000
G	12	108060000	108080000	12	108260000	108280000	.	.	.	.	0,255,255	44	13.9923	15.7899	20.3554	18.8754	3.55615e-06	0.000310716	0.0255248	0.00053038	2	108070000	108280000	10000
G	12	89020000	89040000	12	89380000	89400000	.	.	.	.	0,255,255	44	15.0112	12.6454	13.8228	18.3661	3.55615e-06	1.82292e-06	4.41725e-06	0.00053038	1	89030000	89390000	0
G	12	65940000	65960000	12	66480000	66500000	.	.	.	.	0,255,255	44	14.677	11.8709	12.6053	18.205	3.55615e-06	7.81674e-09	4.41725e-06	0.00053038	2	65950000	66470000	20000
G	12	25580000	25600000	12	26160000	26180000	.	.	.	.	0,255,255	44	14.2104	12.6496	16.8037	16.0234	3.55615e-06	1.82292e-06	0.000497374	0.00053038	2	25590000	26180000	10000
G	12	19900000	19920000	12	20360000	20380000	.	.	.	.	0,255,255	44	13.6251	16.0234	18.9931	18.4879	3.55615e-06	0.000310716	0.000497374	0.00053038	2	19900000	20370000	10000
G	12	10480000	10500000	12	10700000	10720000	.	.	.	.	0,255,255	44	11.5029	14.697	16.1007	18.9261	1.59107e-08	1.82292e-06	0.000497374	0.00053038	1	10490000	10710000	0
G	12	101800000	101820000	12	102100000	102120000	.	.	.	.	0,255,255	43	18.9518	14.8134	17.4581	14.8484	0.000750272	4.47835e-06	0.000954867	1.06447e-05	3	101810000	102130000	20000
G	12	100180000	100200000	12	100380000	100400000	.	.	.	.	0,255,255	43	16.2359	15.4146	16.5608	18.5325	0.000750272	4.47835e-06	0.000954867	0.00101937	3	100196666	100396666	14907
G	12	92200000	92220000	12	92960000	92980000	.	.	.	.	0,255,255	43	10.8441	14.8475	16.5768	18.4245	4.61576e-08	4.47835e-06	0.000954867	0.00101937	1	92210000	92970000	0
G	12	79800000	79820000	12	80140000	80160000	.	.	.	.	0,255,255	43	16.4245	14.9447	21.9157	19.8047	0.000750272	4.47835e-06	0.0397036	0.0396147	3	79810000	80150000	20000
G	12	58920000	58940000	12	59540000	59560000	.	.	.	.	0,255,255	43	17.4186	14.5386	19.2264	16.1798	0.000750272	4.47835e-06	0.000954867	0.00101937	2	58930000	59530000	20000
G	12	58740000	58760000	12	59480000	59500000	.	.	.	.	0,255,255	43	12.64	13.196	15.5403	17.5503	8.36954e-06	4.47835e-06	1.02928e-05	0.00101937	4	58745000	59475000	25495
G	12	25820000	25840000	12	26160000	26180000	.	.	.	.	0,255,255	43	15.6509	16.2136	19.5722	22.0194	0.000750272	0.000614612	0.0397036	0.0396147	2	25820000	26180000	14142
G	12	17920000	17940000	12	18020000	18040000	.	.	.	.	0,255,255	43	14.0932	15.1819	17.6042	13.0172	8.36954e-06	4.47835e-06	0.000954867	1.06447e-05	2	17920000	18020000	14142
G	12	4440000	4460000	12	4620000	4640000	.	.	.	.	0,255,255	43	22.9125	21.1194	20.4946	23.9155	0.0312785	0.0317197	0.0397036	0.0396147	2	4440000	4630000	10000
G	12	96960000	96980000	12	97380000	97400000	.	.	.	.	0,255,255	42	14.7049	13.718	16.7632	16.7471	1.96447e-05	1.08279e-05	0.00179882	0.00192477	3	96990000	97383333	21082
G	12	92540000	92560000	12	92940000	92960000	.	.	.	.	0,255,255	42	16.0869	15.3328	19.2825	18.7242	0.00142013	1.08279e-05	0.00179882	0.00192477	1	92550000	92950000	0
G	12	72400000	72420000	12	72660000	72680000	.	.	.	.	0,255,255	42	15.8701	14.4401	18.3485	15.612	0.00142013	1.08279e-05	0.00179882	0.00192477	1	72410000	72670000	0
G	12	58920000	58940000	12	59460000	59480000	.	.	.	.	0,255,255	42	12.7391	14.3744	17.5624	21.7815	1.96447e-05	1.08279e-05	0.00179882	0.0606015	2	58940000	59480000	14142
G	12	54160000	54180000	12	54580000	54600000	.	.	.	.	0,255,255	42	10.956	10.9468	14.2864	14.986	1.31269e-07	7.03452e-08	2.47874e-05	2.46817e-05	5	54158000	54594000	25298
G	12	46740000	46760000	12	47300000	47320000	.	.	.	.	0,255,255	42	10.548	14.5505	17.9991	17.3863	1.31269e-07	1.08279e-05	0.00179882	0.00192477	4	46760000	47320000	14142
G	12	41660000	41680000	12	42040000	42060000	.	.	.	.	0,255,255	42	15.0443	15.2699	17.0431	17.3696	1.96447e-05	1.08279e-05	0.00179882	0.00192477	2	41670000	42060000	10000
G	12	7340000	7360000	12	7600000	7620000	.	.	.	.	0,255,255	42	16.9119	14.9399	17.6368	16.0178	0.00142013	1.08279e-05	0.00179882	0.00192477	1	7350000	7610000	0
G	12	3440000	3460000	12	3880000	3900000	.	.	.	.	0,255,255	42	15.8991	14.3147	20.9527	19.5969	0.00142013	1.08279e-05	0.0606561	0.0606015	7	3427142	3904285	30905
G	12	114040000	114060000	12	114260000	114280000	.	.	.	.	0,255,255	41	15.4585	17.2728	15.7804	17.7533	4.37473e-05	0.00224138	0.00332372	0.00353111	1	114050000	114270000	0
G	12	99080000	99100000	12	99380000	99400000	.	.	.	.	0,255,255	41	19.0642	14.03	13.9939	17.1882	0.00261485	2.57519e-05	5.54908e-05	0.00353111	4	99110000	99385000	20616
G	12	91760000	91780000	12	93040000	93060000	.	.	.	.	0,255,255	41	15.3688	9.46336	14.9585	10.8546	4.37473e-05	7.82675e-10	5.54908e-05	5.27622e-07	2	91770000	93040000	10000
G	12	89940000	89960000	12	91300000	91320000	.	.	.	.	0,255,255	41	11.6193	8.08231	10.5607	13.5118	3.67119e-07	7.82675e-10	5.19666e-07	5.7195e-05	1	89950000	91310000	0
G	12	89940000	89960000	12	91240000	91260000	.	.	.	.	0,255,255	41	10.1379	9.42208	14.2261	10.4141	3.67119e-07	7.82675e-10	5.54908e-05	5.27622e-07	1	89950000	91250000	0
G	12	65700000	65720000	12	66480000	66500000	.	.	.	.	0,255,255	41	12.0358	10.675	15.8487	15.0373	3.67119e-07	2.02978e-07	0.00332372	5.7195e-05	4	65705000	66490000	20616
G	12	39700000	39720000	12	40060000	40080000	.	.	.	.	0,255,255	41	12.7431	11.4227	14.497	13.047	4.37473e-05	2.02978e-07	5.54908e-05	5.7195e-05	1	39710000	40070000	0
G	12	22220000	22240000	12	22580000	22600000	.	.	.	.	0,255,255	41	12.7411	10.4935	14.614	12.2841	4.37473e-05	2.02978e-07	5.54908e-05	5.27622e-07	1	22230000	22590000	0
G	12	116440000	116460000	12	117040000	117060000	.	.	.	.	0,255,255	40	12.445	11.2662	18.7276	13.6066	9.61479e-05	5.72177e-07	0.00600568	0.000124889	3	116450000	117063333	33334
G	12	111320000	111340000	12	111740000	111760000	.	.	.	.	0,255,255	40	18.4925	11.9284	10.4596	17.6662	0.00462721	5.72177e-07	1.43334e-06	0.006275	4	111360000	111740000	31623
G	12	95480000	95500000	12	95920000	95940000	.	.	.	.	0,255,255	40	11.7582	11.067	14.1082	16.0673	9.87901e-07	5.72177e-07	0.000121738	0.006275	3	95470000	95923333	24037
G	12	80800000	80820000	12	81320000	81340000	.	.	.	.	0,255,255	40	9.21038	10.6536	14.3146	11.7202	6.13639e-09	5.72177e-07	0.000121738	1.42612e-06	1	80810000	81330000	0
G	12	47420000	47440000	12	48080000	48100000	.	.	.	.	0,255,255	40	11.3625	8.49826	12.2741	10.9424	9.87901e-07	2.71963e-09	1.43334e-06	1.42612e-06	5	47434000	48058000	32249
G	12	18400000	18420000	12	19320000	19340000	.	.	.	.	0,255,255	40	10.648	9.94863	13.7187	12.6724	9.87901e-07	5.72177e-07	0.000121738	0.000124889	1	18410000	19330000	0
G	12	115100000	115120000	12	115840000	115860000	.	.	.	.	0,255,255	39	13.3519	11.4446	18.7576	11.4354	0.000204354	1.56981e-06	0.0106154	3.76439e-06	1	115110000	115850000	0
G	12	103340000	103360000	12	103880000	103900000	.	.	.	.	0,255,255	39	12.2747	12.5193	15.1153	14.9696	2.67194e-06	0.000132649	0.000261891	0.000269024	1	103350000	103890000	0
G	12	58740000	58760000	12	59260000	59280000	.	.	.	.	0,255,255	39	13.2588	13.4509	17.7167	13.826	0.000204354	0.000132649	0.0106154	0.000269024	3	58756666	59276666	14907
G	12	14860000	14880000	12	15360000	15380000	.	.	.	.	0,255,255	39	9.72063	12.0935	16.9389	14.1668	2.10105e-08	1.56981e-06	0.0106154	0.000269024	2	14880000	15370000	10000
G	12	79940000	79960000	12	80580000	80600000	.	.	.	.	0,255,255	38	10.4477	12.473	13.5457	16.9249	6.93499e-06	0.000288967	0.000546816	0.0186876	2	79950000	80580000	10000
G	12	62960000	62980000	12	63440000	63460000	.	.	.	.	0,255,255	38	8.15901	8.70515	10.0053	14.6873	6.44935e-08	3.29852e-08	9.39715e-06	0.000568928	3	62956666	63463333	27487
G	12	52540000	52560000	12	52940000	52960000	.	.	.	.	0,255,255	38	6.95967	6.90307	10.5168	8.51919	2.47096e-10	1.71301e-10	9.39715e-06	8.66825e-08	1	52550000	52950000	0
G	12	46780000	46800000	12	47320000	47340000	.	.	.	.	0,255,255	38	9.27649	12.6192	13.2853	16.5759	6.44935e-08	0.000288967	0.000546816	0.0186876	1	46790000	47330000	0
G	12	40140000	40160000	12	40500000	40520000	.	.	.	.	0,255,255	38	13.7312	12.1879	18.7533	12.6019	0.000420835	4.20506e-06	0.0181262	0.000568928	2	40150000	40520000	10000
G	12	115600000	115620000	12	116180000	116200000	.	.	.	.	0,255,255	37	11.7077	12.6509	15.2676	16.3057	1.7205e-05	0.000612534	0.00111313	0.0309278	2	115590000	116190000	20000
G	12	55580000	55600000	12	56000000	56020000	.	.	.	.	0,255,255	37	11.6119	8.69079	11.192	11.7038	1.7205e-05	1.04619e-07	2.27931e-05	2.39628e-05	2	55580000	56010000	10000
G	12	45560000	45580000	12	46140000	46160000	.	.	.	.	0,255,255	37	10.3454	12.2675	16.3878	13.2192	1.7205e-05	1.08263e-05	0.03019	0.0011733	2	45570000	46140000	10000
G	12	41000000	41020000	12	41300000	41320000	.	.	.	.	0,255,255	37	13.2249	11.8622	12.3945	14.2571	0.000850596	1.08263e-05	0.00111313	0.0011733	2	41020000	41310000	10000
G	12	124520000	124540000	12	125240000	125260000	.	.	.	.	0,255,255	36	7.41354	9.412	15.1162	11.8331	3.89826e-09	3.30057e-07	0.00221696	5.85598e-05	4	124530000	125260000	22361
G	12	58740000	58760000	12	59540000	59560000	.	.	.	.	0,255,255	36	16.4433	14.4073	17.9947	16.8514	0.0360113	0.00125565	0.0485391	0.049841	2	58740000	59550000	10000
G	12	52540000	52560000	12	53380000	53400000	.	.	.	.	0,255,255	36	13.8772	9.95673	14.2603	14.5015	0.00167733	2.73749e-05	0.00221696	0.00229993	2	52550000	53380000	10000
G	12	44400000	44420000	12	45320000	45340000	.	.	.	.	0,255,255	36	9.90046	8.43721	10.9959	12.5605	4.1741e-05	3.30057e-07	5.38428e-05	0.00229993	1	44410000	45330000	0
G	12	21620000	21640000	12	21800000	21820000	.	.	.	.	0,255,255	36	15.1449	13.1039	10.6884	15.467	0.00167733	0.00125565	5.38428e-05	0.00229993	1	21630000	21810000	0
G	12	19000000	19020000	12	19320000	19340000	.	.	.	.	0,255,255	36	11.8575	11.9773	12.7859	13.2596	4.1741e-05	2.73749e-05	0.00221696	0.00229993	1	19010000	19330000	0
G	12	102320000	102340000	12	102860000	102880000	.	.	.	.	0,255,255	35	12.1265	14.3227	16.1851	18.0099	9.7188e-05	0.00249891	0.0757675	0.0776056	3	102330000	102870000	20000
G	12	92140000	92160000	12	92560000	92580000	.	.	.	.	0,255,255	35	14.6702	14.7195	14.7037	15.0763	0.00320255	0.00249891	0.00428755	0.00441072	1	92150000	92570000	0
G	12	79800000	79820000	12	80560000	80580000	.	.	.	.	0,255,255	35	10.5402	9.70825	14.1325	11.6845	9.7188e-05	1.02384e-06	0.00428755	0.00014012	2	79800000	80580000	14142
G	12	63800000	63820000	12	64180000	64200000	.	.	.	.	0,255,255	35	14.7664	11.6058	13.0347	16.7676	0.00320255	6.73644e-05	0.00428755	0.0776056	2	63810000	64200000	10000
G	12	43740000	43760000	12	44120000	44140000	.	.	.	.	0,255,255	35	14.4329	11.0433	11.3279	13.2975	0.00320255	6.73644e-05	0.00012711	0.00441072	3	43756666	44123333	14908
G	12	19880000	19900000	12	20740000	20760000	.	.	.	.	0,255,255	35	9.72901	9.1826	10.6458	12.142	1.78912e-06	1.02384e-06	0.00012711	0.00014012	2	19900000	20750000	10000
G	12	109040000	109060000	12	109520000	109540000	.	.	.	.	0,255,255	34	5.76394	6.76008	5.96472	15.2898	4.47673e-10	3.78865e-08	4.06086e-10	0.00826397	1	109050000	109530000	0
G	12	46540000	46560000	12	47340000	47360000	.	.	.	.	0,255,255	33	12.6557	12.0871	13.1248	14.2621	0.0106752	0.000365593	0.0142996	0.0149253	2	46550000	47340000	10000
G	12	27900000	27920000	12	28300000	28320000	.	.	.	.	0,255,255	33	9.95205	9.85432	14.5583	11.453	0.000488567	0.000365593	0.0142996	0.000681913	1	27910000	28310000	0
G	12	14020000	14040000	12	14320000	14340000	.	.	.	.	0,255,255	33	12.0094	11.2064	11.1216	13.1103	0.000488567	0.000365593	0.000641389	0.0149253	1	14030000	14330000	0
G	12	118900000	118920000	12	119460000	119480000	.	.	.	.	0,255,255	32	13.5735	12.5927	15.1269	14.7022	0.018585	0.0162409	0.0251387	0.0262422	2	118900000	119480000	14142
G	12	118840000	118860000	12	119840000	119860000	.	.	.	.	0,255,255	32	10.619	9.94729	14.8667	10.0975	0.00104296	0.000821786	0.0251387	0.00145027	2	118840000	119850000	10000
G	12	59800000	59820000	12	60860000	60880000	.	.	.	.	0,255,255	32	8.54013	9.922	12.8622	10.7445	3.65068e-05	0.000821786	0.0251387	0.00145027	2	59810000	60890000	20000
G	12	82260000	82280000	12	82600000	82620000	.	.	.	.	0,255,255	31	8.25187	8.98288	9.5253	9.72292	9.39173e-05	6.68908e-05	0.000127624	0.000139757	1	82270000	82610000	0
G	12	67740000	67760000	12	68340000	68360000	.	.	.	.	0,255,255	31	9.53325	9.31922	12.3325	11.8143	9.39173e-05	6.68908e-05	0.00285147	0.00300365	1	67750000	68350000	0
G	12	38720000	38740000	12	39460000	39480000	.	.	.	.	0,255,255	31	9.3816	9.90048	10.8118	10.0652	9.39173e-05	0.0017752	0.00285147	0.00300365	2	38730000	39480000	10000
G	12	108920000	108940000	12	109520000	109540000	.	.	.	.	0,255,255	30	7.62493	7.90577	6.12515	13.1623	7.03825e-06	0.000170239	1.50827e-07	0.0721752	2	108950000	109530000	20000
G	12	100740000	100760000	12	101120000	101140000	.	.	.	.	0,255,255	30	7.52369	8.51082	10.9873	9.45893	7.03825e-06	0.000170239	0.00563215	0.000340333	1	100750000	101130000	0
G	12	63500000	63520000	12	64180000	64200000	.	.	.	.	0,255,255	30	9.31888	6.53462	10.5647	8.93362	0.000226592	4.93173e-06	0.00563215	0.000340333	1	63510000	64190000	0
G	12	55600000	55620000	12	55940000	55960000	.	.	.	.	0,255,255	30	8.95487	8.87534	11.6157	11.142	0.000226592	0.000170239	0.00563215	0.00603059	1	55610000	55950000	0
G	12	46540000	46560000	12	47040000	47060000	.	.	.	.	0,255,255	30	9.70693	11.9902	15.4044	14.9398	0.000226592	0.00366747	0.0687962	0.0721752	2	46540000	47050000	10000
G	12	24060000	24080000	12	24280000	24300000	.	.	.	.	0,255,255	30	9.77779	11.3409	11.7207	10.995	0.000226592	0.00366747	0.00563215	0.00603059	1	24070000	24290000	0
G	12	15420000	15440000	12	16000000	16020000	.	.	.	.	0,255,255	30	2.81854	4.44997	6.83308	6.70385	8.37891e-15	6.84163e-10	9.58496e-06	1.02914e-05	1	15430000	16010000	0
G	12	8220000	8240000	12	8540000	8560000	.	.	.	.	0,255,255	30	8.72389	7.72287	9.66333	10.6497	0.000226592	4.93173e-06	0.000317014	0.00603059	3	8250000	8550000	20000
G	12	82020000	82040000	12	82720000	82740000	.	.	.	.	0,255,255	29	9.76351	7.66369	7.99231	8.86081	0.000537055	1.49159e-05	0.000719798	0.00080033	1	82030000	82730000	0
G	12	77440000	77460000	12	78320000	78340000	.	.	.	.	0,255,255	29	9.15052	7.40117	8.1877	11.89	0.000537055	1.49159e-05	0.000719798	0.0116507	1	77450000	78330000	0
G	12	58360000	58380000	12	59480000	59500000	.	.	.	.	0,255,255	29	6.77226	7.62303	12.1696	6.2337	2.07803e-05	1.49159e-05	0.0108805	2.89311e-05	1	58370000	59490000	0
G	12	42520000	42540000	12	43720000	43740000	.	.	.	.	0,255,255	29	7.51506	7.08448	8.03403	9.12718	2.07803e-05	1.49159e-05	0.000719798	0.00080033	4	42525000	43705000	25495
G	12	41680000	41700000	12	42440000	42460000	.	.	.	.	0,255,255	29	8.87724	8.11814	9.48174	10.0755	0.000537055	0.000414028	0.000719798	0.0116507	5	41682000	42434000	25298
G	12	38720000	38740000	12	39660000	39680000	.	.	.	.	0,255,255	29	10.4798	8.33552	9.68838	8.76158	0.00800599	0.000414028	0.000719798	0.00080033	2	38740000	39670000	10000
G	12	29680000	29700000	12	30780000	30800000	.	.	.	.	0,255,255	29	4.97016	7.4737	10.1969	7.2089	4.82934e-07	1.49159e-05	0.0108805	2.89311e-05	1	29690000	30790000	0
G	12	97380000	97400000	12	98760000	98780000	.	.	.	.	0,255,255	28	6.99958	5.74898	6.41591	8.67554	5.93932e-05	1.42346e-06	8.08295e-05	0.00179869	2	97400000	98770000	10000
G	12	1760000	1780000	12	2360000	2380000	.	.	.	.	0,255,255	28	6.5892	6.47336	9.46295	6.4058	5.93932e-05	4.59852e-05	0.00163764	8.33456e-05	1	1770000	2370000	0
G	12	19640000	19660000	12	20100000	20120000	.	.	.	.	0,255,255	27	9.79059	10.2462	10.7974	11.0768	0.00262357	0.0260785	0.0359919	0.0387801	2	19660000	20120000	14142
G	12	124280000	124300000	12	124800000	124820000	.	.	.	.	0,255,255	26	7.25185	6.8595	8.20182	8.28785	0.000419913	0.000346284	0.00754183	0.00791229	2	124300000	124820000	14142
G	12	11720000	11740000	12	12500000	12520000	.	.	.	.	0,255,255	25	7.65464	5.81493	7.57594	7.08972	0.00104481	5.57657e-05	0.00148692	0.00146635	2	11720000	12500000	14142
G	12	94520000	94540000	12	95720000	95740000	.	.	.	.	0,255,255	24	4.79369	4.82073	7.51725	5.20662	5.79955e-06	7.26447e-06	0.00347037	0.000284893	1	94530000	95730000	0
G	12	11700000	11720000	12	12860000	12880000	.	.	.	.	0,255,255	24	6.31237	4.14551	6.3527	6.01999	0.00237187	7.26447e-06	0.00347037	0.000284893	2	11720000	12870000	10000
G	12	59560000	59580000	12	60900000	60920000	.	.	.	.	0,255,255	21	5.13696	5.85888	6.14162	6.21366	0.00327184	0.00367303	0.00539926	0.00540901	1	59570000	60910000	0
G	12	96960000	96980000	12	98780000	98800000	.	.	.	.	0,255,255	20	6.67874	4.72228	5.92423	6.58971	0.0409868	0.00114941	0.0123502	0.0606405	2	96970000	98780000	10000
G	12	25380000	25400000	12	26200000	26220000	.	.	.	.	0,255,255	20	6.65063	4.60925	5.91008	5.49705	0.0409868	0.00114941	0.0123502	0.0124129	2	25390000	26200000	10000
G	12	23400000	23420000	12	24880000	24900000	.	.	.	.	0,255,255	17	3.28447	3.46554	3.64819	3.80727	0.00264227	0.00395989	0.0052935	0.0052814	1	23410000	24890000	0
G	12	25120000	25140000	12	26120000	26140000	.	.	.	.	0,255,255	15	1.95927	2.24956	2.67417	2.1622	4.13663e-05	0.000934802	0.0080735	0.000924583	1	25130000	26130000	0
G	12	102820000	102840000	12	104240000	104260000	.	.	.	.	0,255,255	14	1.90794	1.92037	2.1805	1.95092	0.000246385	0.000574085	0.00462557	0.000613065	1	102830000	104250000	0
G	12	67660000	67680000	12	71040000	71060000	.	.	.	.	0,255,255	13	1.21476	1.39776	1.43851	1.439	0.000575969	0.000485085	0.000505348	0.000539605	1	67670000	71050000	0
G	13	45620000	45640000	13	45840000	45860000	.	.	.	.	0,255,255	118	34.403	31.0409	35.6542	42.5994	1.38703e-19	7.2659e-20	8.56994e-20	3.70046e-13	8	45627500	45865000	41608
G	13	29100000	29120000	13	29200000	29220000	.	.	.	.	0,255,255	111	52.0566	46.5836	40.8338	55.6687	1.48299e-06	4.57909e-11	7.26562e-11	4.37559e-06	1	29110000	29210000	0
G	13	79980000	80000000	13	80100000	80120000	.	.	.	.	0,255,255	109	36.4772	28.9335	35.781	35.6622	5.55805e-16	5.01568e-23	4.55679e-16	6.60658e-16	2	80000000	80110000	10000
G	13	37420000	37440000	13	37540000	37560000	.	.	.	.	0,255,255	104	34.6605	30.4012	35.4193	38.6819	4.51026e-14	1.4245e-20	4.3307e-14	5.54599e-14	3	37430000	37550000	20000
G	13	29240000	29260000	13	29360000	29380000	.	.	.	.	0,255,255	102	42.776	30.4178	31.9134	34.1457	2.23557e-08	1.25965e-19	2.45649e-13	2.75015e-13	3	29256666	29363333	14908
G	13	49880000	49900000	13	50000000	50020000	.	.	.	.	0,255,255	99	37.8577	34.2769	46.566	41.0013	2.83451e-12	2.2037e-12	2.54979e-07	2.59275e-07	2	49890000	50000000	10000
G	13	36540000	36560000	13	36840000	36860000	.	.	.	.	0,255,255	98	23.995	18.8946	25.7526	20.6903	6.6024e-24	2.84039e-31	1.68139e-17	9.34025e-24	6	36556666	36840000	30732
G	13	30160000	30180000	13	30260000	30280000	.	.	.	.	0,255,255	95	49.2971	45.4998	44.8152	49.9923	0.00185028	2.0306e-06	2.57362e-06	0.00550579	1	30170000	30270000	0
G	13	24580000	24600000	13	24780000	24800000	.	.	.	.	0,255,255	93	34.4092	28.4912	28.2552	38.8561	3.18435e-10	1.53113e-15	2.52175e-15	7.42203e-06	4	24605000	24795000	25495
G	13	99920000	99940000	13	100080000	100100000	.	.	.	.	0,255,255	83	32.6026	34.1095	42.1773	34.2737	4.21623e-07	3.49703e-07	0.00100583	5.07845e-07	2	99930000	100080000	10000
G	13	41980000	42000000	13	42220000	42240000	.	.	.	.	0,255,255	83	29.9712	24.1308	29.3293	27.0802	3.16502e-11	2.18239e-16	2.95303e-11	3.38587e-11	6	41976666	42226666	26875
G	13	98500000	98520000	13	98600000	98620000	.	.	.	.	0,255,255	82	42.6936	31.9928	42.4017	37.7251	0.000832754	6.60112e-07	0.00155441	9.45706e-07	4	98515000	98630000	20616
G	13	30080000	30100000	13	30260000	30280000	.	.	.	.	0,255,255	82	30.0143	27.6492	32.5645	38.7492	7.62342e-11	4.71972e-11	9.01319e-07	9.45706e-07	2	30090000	30280000	10000
G	13	32100000	32120000	13	32300000	32320000	.	.	.	.	0,255,255	81	29.3768	32.756	36.7234	33.8438	1.79317e-10	1.26122e-06	1.70907e-06	1.78301e-06	1	32110000	32310000	0
G	13	95840000	95860000	13	96040000	96060000	.	.	.	.	0,255,255	80	23.2543	22.4949	34.7802	24.1571	1.0387e-14	5.77069e-15	3.26017e-06	1.13478e-14	6	95843333	96043333	29814
G	13	52000000	52020000	13	52360000	52380000	.	.	.	.	0,255,255	79	19.5988	16.8471	22.5248	23.3762	3.02572e-14	1.00303e-19	3.18374e-14	3.32056e-14	6	52006666	52343333	26875
G	13	85480000	85500000	13	86380000	86400000	.	.	.	.	0,255,255	77	15.6239	11.751	15.0328	18.3755	3.10723e-18	1.4099e-29	2.76839e-23	5.12364e-18	10	85500000	86386000	38419
G	13	50260000	50280000	13	50420000	50440000	.	.	.	.	0,255,255	77	31.0225	31.5259	33.7721	31.8966	1.59843e-05	1.42996e-05	1.96817e-05	1.96351e-05	2	50260000	50420000	14142
G	13	34500000	34520000	13	34640000	34660000	.	.	.	.	0,255,255	77	34.6587	32.3904	36.6508	30.668	1.59843e-05	1.42996e-05	1.96817e-05	5.32748e-09	1	34510000	34650000	0
G	13	39720000	39740000	13	40180000	40200000	.	.	.	.	0,255,255	75	12.2975	13.5705	13.6513	27.3639	1.01997e-27	1.16502e-22	4.63355e-22	2.62619e-08	3	39723333	40203333	27488
G	13	97880000	97900000	13	97980000	98000000	.	.	.	.	0,255,255	74	35.3746	29.7546	34.4284	32.0179	8.80744e-05	3.52038e-08	0.000109382	0.00010795	2	97880000	98000000	14142
G	13	110880000	110900000	13	111060000	111080000	.	.	.	.	0,255,255	72	33.8626	32.1568	37.4826	39.3517	0.000252126	0.000235062	0.000317699	0.0577178	4	110875000	111085000	25495
G	13	27560000	27580000	13	27920000	27940000	.	.	.	.	0,255,255	72	18.2396	15.4166	24.2094	17.1684	1.30239e-15	8.11947e-21	3.55031e-11	1.90005e-15	8	27542500	27917500	34821
G	13	45040000	45060000	13	45520000	45540000	.	.	.	.	0,255,255	71	26.9391	17.4246	20.6969	24.7121	4.83966e-07	1.84099e-15	9.07043e-11	5.28965e-07	10	45070000	45530000	44721
G	13	36040000	36060000	13	36280000	36300000	.	.	.	.	0,255,255	70	28.8831	29.8279	38.5722	31.1333	9.75859e-07	6.80942e-07	0.000872603	0.000864534	1	36050000	36290000	0
G	13	30420000	30440000	13	30680000	30700000	.	.	.	.	0,255,255	70	23.2828	21.4816	23.5523	30.7172	2.14992e-10	1.43986e-10	2.31133e-10	1.07425e-06	2	30420000	30690000	10000
G	13	59960000	59980000	13	60240000	60260000	.	.	.	.	0,255,255	69	21.3259	21.2462	30.3903	22.0605	5.38377e-10	3.65491e-10	1.99939e-06	5.85511e-10	2	59970000	60230000	20000
G	13	39980000	40000000	13	40180000	40200000	.	.	.	.	0,255,255	68	32.7209	27.6746	30.9647	32.3025	0.00171434	2.77938e-06	0.00227662	0.0022226	4	39975000	40185000	25495
G	13	37680000	37700000	13	38160000	38180000	.	.	.	.	0,255,255	68	17.3199	13.8552	19.3323	20.3157	1.178e-13	1.70991e-18	1.75473e-13	1.44799e-09	10	37680000	38168000	48415
G	13	113920000	113940000	13	114040000	114060000	.	.	.	.	0,255,255	67	33.2725	31.5518	37.0953	29.1322	0.00268268	0.00268616	0.0035743	8.29098e-06	2	113930000	114040000	10000
G	13	75940000	75960000	13	76100000	76120000	.	.	.	.	0,255,255	67	30.2977	28.0321	32.6806	29.7786	7.53889e-06	5.41443e-06	0.0035743	8.29098e-06	1	75950000	76110000	0
G	13	32000000	32020000	13	32360000	32380000	.	.	.	.	0,255,255	67	25.2538	20.9143	25.2222	23.4796	7.53889e-06	2.24195e-09	7.76416e-06	3.52464e-09	3	32003333	32363333	14907
G	13	30520000	30540000	13	30640000	30660000	.	.	.	.	0,255,255	67	33.3957	34.1583	31.9573	36.6234	0.00268268	0.00268616	0.0035743	0.00349546	1	30530000	30650000	0
G	13	24300000	24320000	13	24420000	24440000	.	.	.	.	0,255,255	66	31.1917	28.9514	27.7381	35.7196	0.00411205	1.06205e-05	1.50762e-05	0.00542433	1	24310000	24430000	0
G	13	78340000	78360000	13	78680000	78700000	.	.	.	.	0,255,255	65	15.4056	12.7953	15.1433	14.7544	2.93347e-16	9.19857e-17	3.82175e-16	3.54394e-16	4	78365000	78695000	25495
G	13	103220000	103240000	13	103500000	103520000	.	.	.	.	0,255,255	64	27.4584	17.3671	24.5204	18.3709	5.18273e-05	4.99846e-12	4.47354e-08	1.28353e-11	2	103240000	103500000	14142
G	13	48900000	48920000	13	49140000	49160000	.	.	.	.	0,255,255	64	21.2572	17.9824	19.2552	24.5153	4.21573e-08	4.99846e-12	1.31579e-11	4.63115e-08	2	48900000	49150000	10000
G	13	32100000	32120000	13	32360000	32380000	.	.	.	.	0,255,255	64	22.6721	24.6435	30.2894	27.7801	4.21573e-08	3.92441e-05	5.40182e-05	5.7447e-05	1	32110000	32370000	0
G	13	31800000	31820000	13	31980000	32000000	.	.	.	.	0,255,255	64	27.2218	22.86	25.0938	23.7707	5.18273e-05	3.04283e-08	5.40182e-05	4.63115e-08	1	31810000	31990000	0
G	13	76440000	76460000	13	77040000	77060000	.	.	.	.	0,255,255	63	16.3104	10.2868	13.9339	13.5074	2.60403e-11	9.49769e-20	4.96531e-15	4.4159e-15	7	76470000	77052857	30372
G	13	49160000	49180000	13	49340000	49360000	.	.	.	.	0,255,255	63	30.2664	21.5314	21.132	20.1799	9.47612e-05	7.08708e-08	1.01913e-07	1.06197e-07	2	49170000	49340000	10000
G	13	24140000	24160000	13	24440000	24460000	.	.	.	.	0,255,255	63	18.2439	19.0202	18.7912	32.3126	2.60403e-11	1.43702e-11	3.51259e-11	0.0186416	1	24150000	24450000	0
G	13	113320000	113340000	13	113500000	113520000	.	.	.	.	0,255,255	62	27.6058	28.0919	32.2147	36.3585	0.000171444	0.000131809	0.027468	0.0269583	2	113320000	113520000	14142
G	13	101800000	101820000	13	102100000	102120000	.	.	.	.	0,255,255	62	21.2633	18.7961	25.8378	24.001	2.14684e-07	4.12586e-11	0.000181994	2.41778e-07	7	101804285	102130000	40406
G	13	47080000	47100000	13	47280000	47300000	.	.	.	.	0,255,255	62	35.362	27.3253	27.0026	35.9956	0.0197795	0.000131809	0.000181994	0.0269583	4	47085000	47300000	26926
G	13	99100000	99120000	13	99300000	99320000	.	.	.	.	0,255,255	61	27.6202	23.0637	31.3188	23.6853	0.000303676	3.62896e-07	0.039275	5.40841e-07	2	99100000	99310000	10000
G	13	30340000	30360000	13	30680000	30700000	.	.	.	.	0,255,255	61	24.6162	19.5553	23.0385	29.3451	0.000303676	1.18825e-10	5.36112e-07	0.000343992	2	30360000	30690000	10000
G	13	97780000	97800000	13	98000000	98020000	.	.	.	.	0,255,255	60	25.0111	24.8106	24.6061	38.7013	0.000530416	0.000422253	0.00056884	0.0551174	3	97776666	98003333	14908
G	13	44780000	44800000	13	44980000	45000000	.	.	.	.	0,255,255	60	26.7231	25.5315	25.1387	33.4124	0.000530416	0.000422253	0.00056884	0.0551174	2	44780000	44990000	10000
G	13	44480000	44500000	13	45020000	45040000	.	.	.	.	0,255,255	60	15.085	9.94935	12.7344	16.4334	1.64448e-13	8.13382e-18	2.13495e-13	7.90699e-10	5	44478000	45026000	25298
G	13	28880000	28900000	13	29200000	29220000	.	.	.	.	0,255,255	60	20.9155	21.6982	28.1783	31.1297	1.04208e-06	8.05338e-07	0.00056884	0.0551174	3	28890000	29230000	20000
G	13	103560000	103580000	13	103780000	103800000	.	.	.	.	0,255,255	59	18.7908	14.984	19.0229	14.7618	1.4912e-09	1.81436e-13	1.98392e-09	6.33048e-13	3	103590000	103783333	24037
G	13	46700000	46720000	13	46880000	46900000	.	.	.	.	0,255,255	59	27.2507	24.0563	21.5667	26.9118	0.00089721	1.761e-06	2.48327e-06	0.00103786	1	46710000	46890000	0
G	13	40640000	40660000	13	41240000	41260000	.	.	.	.	0,255,255	59	15.4864	14.9724	16.2711	25.8055	5.58252e-13	1.81436e-13	1.98392e-09	0.00103786	3	40636666	41256666	14907
G	13	24040000	24060000	13	24440000	24460000	.	.	.	.	0,255,255	58	18.8789	17.5314	21.7292	27.6647	3.85443e-09	2.36574e-09	5.22829e-06	0.00174852	4	24040000	24460000	14142
G	13	109600000	109620000	13	110760000	110780000	.	.	.	.	0,255,255	57	9.52278	6.96412	13.865	11.3467	1.8643e-19	4.35291e-24	7.57123e-12	2.01446e-15	4	109605000	110765000	35355
G	13	80620000	80640000	13	80900000	80920000	.	.	.	.	0,255,255	57	17.7439	17.6966	14.9289	24.9355	9.85539e-09	6.28171e-09	7.57123e-12	0.00291556	2	80650000	80910000	20000
G	13	36040000	36060000	13	36360000	36380000	.	.	.	.	0,255,255	57	23.0723	22.5309	28.1181	25.8023	9.96121e-06	7.84837e-06	0.00278029	0.00291556	1	36050000	36370000	0
G	13	45140000	45160000	13	45440000	45460000	.	.	.	.	0,255,255	56	18.5194	24.0952	28.7275	29.5983	2.45818e-08	1.62794e-05	0.00457112	0.00478933	4	45145000	45480000	30414
G	13	44200000	44220000	13	44300000	44320000	.	.	.	.	0,255,255	56	23.9176	26.8132	24.7166	28.4754	2.07147e-05	0.00341246	0.00457112	0.00478933	1	44210000	44310000	0
G	13	32640000	32660000	13	32760000	32780000	.	.	.	.	0,255,255	56	23.8226	29.1812	27.7863	30.0489	2.07147e-05	0.00341246	0.00457112	0.00478933	1	32650000	32770000	0
G	13	97760000	97780000	13	97860000	97880000	.	.	.	.	0,255,255	55	30.1015	22.5731	25.8099	24.363	0.00626236	3.28787e-05	0.00739121	4.50358e-05	1	97770000	97870000	0
G	13	45100000	45120000	13	45520000	45540000	.	.	.	.	0,255,255	55	23.6495	19.0533	25.6617	25.6478	4.13568e-05	4.18345e-08	0.00739121	0.0077231	1	45110000	45530000	0
G	13	31380000	31400000	13	31600000	31620000	.	.	.	.	0,255,255	55	26.6441	23.084	20.0159	30.34	0.00626236	3.28787e-05	4.51669e-05	0.0077231	1	31390000	31610000	0
G	13	27060000	27080000	13	27260000	27280000	.	.	.	.	0,255,255	55	25.2362	24.7941	30.0226	27.453	0.00626236	0.00559379	0.00739121	0.0077231	2	27060000	27270000	10000
G	13	21060000	21080000	13	21380000	21400000	.	.	.	.	0,255,255	55	18.9331	19.0056	28.888	20.1483	6.17834e-08	4.18345e-08	0.00739121	4.50358e-05	4	21070000	21425000	45000
G	13	106740000	106760000	13	107160000	107180000	.	.	.	.	0,255,255	54	20.2633	17.1418	17.769	24.6722	8.1495e-05	1.04202e-07	2.05308e-07	0.012299	4	106755000	107160000	36401
G	13	42240000	42260000	13	42600000	42620000	.	.	.	.	0,255,255	54	16.5517	17.9153	26.6199	20.2694	1.51756e-07	1.04202e-07	0.0115529	8.85175e-05	4	42240000	42635000	36401
G	13	40360000	40380000	13	40500000	40520000	.	.	.	.	0,255,255	54	20.7256	23.21	22.6688	23.5171	8.1495e-05	6.58375e-05	8.99009e-05	8.85175e-05	1	40370000	40510000	0
G	13	26760000	26780000	13	27260000	27280000	.	.	.	.	0,255,255	54	13.9085	13.9379	20.7323	16.4012	1.73955e-10	6.51283e-11	8.99009e-05	2.26734e-07	3	26756666	27276666	14907
G	13	26740000	26760000	13	27060000	27080000	.	.	.	.	0,255,255	54	19.945	19.7447	27.3283	20.0596	8.1495e-05	6.58375e-05	0.0115529	8.85175e-05	1	26750000	27070000	0
G	13	52460000	52480000	13	52680000	52700000	.	.	.	.	0,255,255	53	18.6777	19.7629	21.7018	25.6189	3.68728e-07	0.000128764	0.000172868	0.0190987	3	52463333	52683333	33993
G	13	43660000	43680000	13	44360000	44380000	.	.	.	.	0,255,255	53	11.4477	12.3042	14.2048	20.2602	3.35518e-13	1.30117e-13	6.8584e-10	0.000171253	1	43670000	44370000	0
G	13	33900000	33920000	13	34100000	34120000	.	.	.	.	0,255,255	53	24.5608	23.1335	24.6566	24.3373	0.000153399	0.000128764	0.0180269	0.000171253	1	33910000	34110000	0
G	13	101360000	101380000	13	101740000	101760000	.	.	.	.	0,255,255	52	16.9205	13.8383	16.6442	18.4569	8.70981e-07	5.97038e-10	1.19294e-06	1.27687e-06	3	101370000	101750000	20000
G	13	98680000	98700000	13	99060000	99080000	.	.	.	.	0,255,255	52	18.9817	15.4654	18.1144	21.798	8.70981e-07	5.97038e-10	1.19294e-06	0.000323183	3	98696666	99063333	14908
G	13	80240000	80260000	13	80920000	80940000	.	.	.	.	0,255,255	51	16.2127	15.2829	16.0968	22.8647	1.99685e-06	1.73056e-09	2.77709e-06	0.000596162	4	80245000	80940000	33541
G	13	32480000	32500000	13	32860000	32880000	.	.	.	.	0,255,255	50	22.9171	18.4218	23.7232	20.6486	0.000950898	3.25008e-06	0.00107508	0.00108281	3	32490000	32863333	33333
G	13	28080000	28100000	13	28400000	28420000	.	.	.	.	0,255,255	50	14.8939	18.8974	25.4494	22.902	1.17599e-08	3.25008e-06	0.0594793	0.00108281	3	28090000	28396666	21082
G	13	109780000	109800000	13	110420000	110440000	.	.	.	.	0,255,255	49	14.1128	16.3045	18.5435	22.7239	3.23588e-08	7.45621e-06	1.3523e-05	0.00193903	2	109790000	110420000	10000
G	13	27940000	27960000	13	28400000	28420000	.	.	.	.	0,255,255	49	18.2346	16.0292	19.3627	19.8735	1.01876e-05	7.45621e-06	1.3523e-05	0.00193903	2	27960000	28410000	10000
G	13	21860000	21880000	13	22040000	22060000	.	.	.	.	0,255,255	49	25.5865	23.2351	22.0934	24.3923	0.0667453	0.00151719	0.00192536	0.00193903	2	21880000	22040000	14142
G	13	21060000	21080000	13	21480000	21500000	.	.	.	.	0,255,255	49	15.3942	12.4218	19.0302	14.3996	3.23588e-08	1.39651e-08	1.3523e-05	4.0091e-08	2	21060000	21490000	10000
G	13	110460000	110480000	13	110740000	110760000	.	.	.	.	0,255,255	48	18.2813	15.4578	20.7501	20.4785	2.20925e-05	3.8396e-08	0.00334899	0.0033844	3	110450000	110770000	28284
G	13	110420000	110440000	13	110760000	110780000	.	.	.	.	0,255,255	48	21.8524	15.5792	18.0596	21.889	0.00288262	1.62498e-05	2.86589e-05	0.0033844	1	110430000	110770000	0
G	13	52380000	52400000	13	52700000	52720000	.	.	.	.	0,255,255	48	21.378	17.1692	16.9497	22.895	0.00288262	1.62498e-05	2.86589e-05	0.0033844	1	52390000	52710000	0
G	13	113280000	113300000	13	113520000	113540000	.	.	.	.	0,255,255	47	15.8669	12.3479	13.7836	16.877	4.73116e-05	2.42186e-10	2.92296e-07	6.56083e-05	1	113290000	113530000	0
G	13	109600000	109620000	13	110420000	110440000	.	.	.	.	0,255,255	47	17.2355	12.1309	17.1311	12.882	4.73116e-05	2.42186e-10	6.11853e-05	2.82774e-07	3	109616666	110423333	14908
G	13	50660000	50680000	13	51380000	51400000	.	.	.	.	0,255,255	47	16.1954	19.2892	21.872	23.0472	4.73116e-05	3.51663e-05	0.00573833	0.00582285	1	50670000	51390000	0
G	13	26140000	26160000	13	26640000	26660000	.	.	.	.	0,255,255	47	13.5979	12.0204	13.8442	14.6751	2.24791e-07	2.42186e-10	2.92296e-07	2.82774e-07	5	26150000	26634000	25612
G	13	73380000	73400000	13	74280000	74300000	.	.	.	.	0,255,255	46	16.3417	10.1125	13.8243	15.9618	9.80026e-05	8.14754e-10	7.70206e-07	0.000136105	5	73398000	74278000	32985
G	13	42240000	42260000	13	42680000	42700000	.	.	.	.	0,255,255	46	13.7277	12.2313	17.5473	15.5419	5.81933e-07	8.14754e-10	0.000127292	7.29688e-07	1	42250000	42690000	0
G	13	40260000	40280000	13	41260000	41280000	.	.	.	.	0,255,255	45	8.66312	8.31504	10.4205	12.6734	9.66079e-12	3.93588e-12	7.32373e-09	1.78501e-06	3	40276666	41256666	14907
G	13	34360000	34380000	13	35720000	35740000	.	.	.	.	0,255,255	45	15.9116	10.8331	10.8346	19.5868	0.000197235	2.54159e-09	7.32373e-09	0.0160173	1	34370000	35730000	0
G	13	21520000	21540000	13	21720000	21740000	.	.	.	.	0,255,255	45	22.6532	17.9795	21.0675	21.9316	0.0127874	0.000152855	0.0157673	0.0160173	2	21540000	21730000	10000
G	13	102120000	102140000	13	102400000	102420000	.	.	.	.	0,255,255	44	23.2049	18.9053	19.9531	21.2624	0.0202843	0.000310716	0.0255248	0.0255239	2	102150000	102410000	20000
G	13	76540000	76560000	13	77020000	77040000	.	.	.	.	0,255,255	43	14.8883	16.0004	18.5513	22.5019	8.36954e-06	0.000614612	0.000954867	0.0396147	2	76540000	77020000	14142
G	13	74400000	74420000	13	74840000	74860000	.	.	.	.	0,255,255	43	15.5569	16.8587	21.9078	18.9562	8.36954e-06	0.000614612	0.0397036	0.00101937	2	74400000	74860000	14142
G	13	35780000	35800000	13	36280000	36300000	.	.	.	.	0,255,255	43	10.326	11.9294	19.0706	11.3866	4.61576e-08	2.36443e-08	0.000954867	6.80604e-08	1	35790000	36290000	0
G	13	107580000	107600000	13	107780000	107800000	.	.	.	.	0,255,255	42	16.962	15.6105	16.6233	15.4244	0.00142013	0.00118991	0.00179882	2.46817e-05	1	107590000	107790000	0
G	13	47400000	47420000	13	48340000	48360000	.	.	.	.	0,255,255	42	17.0563	12.3253	17.3561	15.6586	0.00142013	7.03452e-08	0.00179882	0.00192477	1	47410000	48350000	0
G	13	31040000	31060000	13	31360000	31380000	.	.	.	.	0,255,255	42	12.605	14.9973	15.8446	18.4021	1.96447e-05	1.08279e-05	0.00179882	0.00192477	1	31050000	31370000	0
G	13	77060000	77080000	13	77460000	77480000	.	.	.	.	0,255,255	41	16.4529	14.4687	16.3766	20.0526	0.00261485	2.57519e-05	0.00332372	0.0904169	2	77060000	77470000	10000
G	13	51120000	51140000	13	51360000	51380000	.	.	.	.	0,255,255	41	19.7595	17.8941	20.8273	19.8502	0.069337	0.00224138	0.0907042	0.0904169	2	51120000	51370000	10000
G	13	43580000	43600000	13	44420000	44440000	.	.	.	.	0,255,255	41	16.3828	12.4783	9.43279	19.5179	0.00261485	2.57519e-05	2.61928e-09	0.00353111	1	43590000	44430000	0
G	13	108980000	109000000	13	109520000	109540000	.	.	.	.	0,255,255	40	12.135	11.1704	14.0716	15.909	9.87901e-07	5.72177e-07	0.000121738	0.006275	6	108980000	109540000	31623
G	13	107200000	107220000	13	107760000	107780000	.	.	.	.	0,255,255	40	11.9574	9.20386	10.4067	16.1162	9.87901e-07	2.71963e-09	1.43334e-06	0.006275	1	107210000	107770000	0
G	13	43660000	43680000	13	44440000	44460000	.	.	.	.	0,255,255	40	15.2954	12.2589	16.017	16.6451	9.61479e-05	5.72177e-07	0.00600568	0.006275	1	43670000	44450000	0
G	13	100580000	100600000	13	101180000	101200000	.	.	.	.	0,255,255	39	12.8935	11.6292	12.2734	16.2606	0.000204354	1.56981e-06	3.75931e-06	0.0109841	3	100570000	101176666	24037
G	13	27940000	27960000	13	28100000	28120000	.	.	.	.	0,255,255	39	15.459	14.1745	17.7489	14.6095	0.000204354	0.000132649	0.0106154	0.000269024	1	27950000	28110000	0
G	13	102780000	102800000	13	103080000	103100000	.	.	.	.	0,255,255	38	13.3446	14.744	18.0838	17.7526	0.000420835	0.000288967	0.0181262	0.0186876	5	102778000	103110000	40792
G	13	101400000	101420000	13	101720000	101740000	.	.	.	.	0,255,255	38	12.9812	12.4303	14.4986	16.5606	0.000420835	0.000288967	0.000546816	0.0186876	1	101410000	101730000	0
G	13	65040000	65060000	13	66160000	66180000	.	.	.	.	0,255,255	38	8.86509	8.6764	11.4285	10.9831	6.44935e-08	3.29852e-08	9.39715e-06	9.62899e-06	3	65043333	66190000	24037
G	13	40340000	40360000	13	41240000	41260000	.	.	.	.	0,255,255	38	8.79053	12.1912	12.7532	19.4356	6.44935e-08	4.20506e-06	0.000546816	0.0186876	3	40336666	41256666	14907
G	13	74300000	74320000	13	75820000	75840000	.	.	.	.	0,255,255	37	11.9049	8.16218	9.95633	10.9342	1.7205e-05	1.04619e-07	2.27931e-05	2.39628e-05	3	74323333	75816666	27487
G	13	101800000	101820000	13	102400000	102420000	.	.	.	.	0,255,255	36	11.7794	12.0679	18.907	13.9532	4.1741e-05	2.73749e-05	0.0485391	0.00229993	3	101796666	102416666	14907
G	13	93860000	93880000	13	95000000	95020000	.	.	.	.	0,255,255	36	13.4399	11.8851	13.9596	17.267	0.00167733	2.73749e-05	0.00221696	0.049841	2	93880000	95000000	14142
G	13	72440000	72460000	13	72820000	72840000	.	.	.	.	0,255,255	36	9.736	11.9627	12.516	14.9893	5.87805e-07	2.73749e-05	0.00221696	0.00229993	1	72450000	72830000	0
G	13	21500000	21520000	13	22040000	22060000	.	.	.	.	0,255,255	36	9.87552	8.50544	9.60199	12.9845	4.1741e-05	3.30057e-07	9.02176e-07	0.00229993	1	21510000	22050000	0
G	13	109780000	109800000	13	110740000	110760000	.	.	.	.	0,255,255	35	9.12936	9.26063	8.7084	15.4248	1.78912e-06	1.02384e-06	2.60394e-06	0.00441072	1	109790000	110750000	0
G	13	78700000	78720000	13	79540000	79560000	.	.	.	.	0,255,255	34	9.62052	9.33808	10.3461	11.9498	4.92004e-06	3.07394e-06	0.000292538	0.000313899	4	78705000	79565000	25495
G	13	76520000	76540000	13	76960000	76980000	.	.	.	.	0,255,255	34	9.98017	11.7326	14.8233	12.9439	0.000222697	0.000160078	0.0079321	0.00826397	1	76530000	76970000	0
G	13	49820000	49840000	13	50160000	50180000	.	.	.	.	0,255,255	34	13.6263	11.0145	11.6703	13.2661	0.00592959	0.000160078	0.000292538	0.00826397	1	49830000	50170000	0
G	13	60460000	60480000	13	60900000	60920000	.	.	.	.	0,255,255	33	10.4257	11.3207	13.2539	11.0333	0.000488567	0.000365593	0.0142996	0.000681913	1	60470000	60910000	0
G	13	50560000	50580000	13	51100000	51120000	.	.	.	.	0,255,255	33	11.1305	11.6335	11.5954	14.1697	0.000488567	0.000365593	0.000641389	0.0149253	1	50570000	51110000	0
G	13	48960000	48980000	13	49340000	49360000	.	.	.	.	0,255,255	33	5.52375	8.15025	7.12777	12.4925	1.9739e-09	8.7976e-06	2.87591e-07	0.0149253	1	48970000	49350000	0
G	13	107860000	107880000	13	108800000	108820000	.	.	.	.	0,255,255	31	8.19504	5.86498	7.84872	7.35556	9.39173e-05	2.25362e-08	0.000127624	3.15818e-06	2	107850000	108810000	20000
G	13	95260000	95280000	13	95820000	95840000	.	.	.	.	0,255,255	31	12.9023	10.5138	10.6157	13.4042	0.0310843	0.0017752	0.00285147	0.0444217	2	95290000	95830000	20000
G	13	41960000	41980000	13	42680000	42700000	.	.	.	.	0,255,255	31	8.06116	7.85777	11.9316	10.1194	9.39173e-05	6.68908e-05	0.00285147	0.00300365	2	41980000	42690000	10000
G	13	76440000	76460000	13	77480000	77500000	.	.	.	.	0,255,255	30	8.33724	6.68869	11.3719	8.01813	0.000226592	4.93173e-06	0.00563215	0.000340333	3	76456666	77503333	27488
G	13	44460000	44480000	13	45520000	45540000	.	.	.	.	0,255,255	29	6.04598	4.81899	7.10973	7.69952	4.82934e-07	3.56733e-09	2.7827e-05	2.89311e-05	3	44483333	45536666	14908
G	13	27520000	27540000	13	28540000	28560000	.	.	.	.	0,255,255	29	4.50434	5.87132	9.32103	6.51665	3.49523e-09	3.5851e-07	0.000719798	2.89311e-05	1	27530000	28550000	0
G	13	27500000	27520000	13	28400000	28420000	.	.	.	.	0,255,255	29	4.65463	7.30665	11.8489	7.62169	3.49523e-09	1.49159e-05	0.0108805	2.89311e-05	1	27510000	28410000	0
G	13	20760000	20780000	13	21480000	21500000	.	.	.	.	0,255,255	29	6.29217	5.76952	8.75276	8.37858	2.07803e-05	3.5851e-07	0.000719798	0.00080033	2	20760000	21490000	10000
G	13	98500000	98520000	13	99060000	99080000	.	.	.	.	0,255,255	27	11.8926	8.16907	10.5336	9.90517	0.0260795	0.00223305	0.0359919	0.0387801	2	98510000	99060000	10000
G	13	66220000	66240000	13	67800000	67820000	.	.	.	.	0,255,255	27	8.97715	7.18584	9.46197	10.3006	0.00262357	0.000129915	0.00356938	0.0387801	3	66236666	67803333	14908
G	13	100300000	100320000	13	101180000	101200000	.	.	.	.	0,255,255	26	5.32678	6.12177	8.56693	7.98951	2.09208e-05	1.67028e-05	0.00754183	0.00791229	3	100296666	101183333	27487
G	13	100260000	100280000	13	101160000	101180000	.	.	.	.	0,255,255	26	6.08664	6.52831	8.60721	9.10884	2.09208e-05	0.000346284	0.00754183	0.00791229	1	100270000	101170000	0
G	13	78940000	78960000	13	79540000	79560000	.	.	.	.	0,255,255	26	6.06465	7.29066	7.50579	9.29719	2.09208e-05	0.000346284	0.000582106	0.00791229	1	78950000	79550000	0
G	13	47360000	47380000	13	48640000	48660000	.	.	.	.	0,255,255	26	9.75846	6.62358	9.50346	6.74555	0.00542429	0.000346284	0.00754183	0.000579433	1	47370000	48650000	0
G	13	25160000	25180000	13	25520000	25540000	.	.	.	.	0,255,255	26	6.64418	6.70704	7.51524	8.86934	0.000419913	0.000346284	0.000582106	0.00791229	2	25160000	25540000	14142
G	13	71880000	71900000	13	72540000	72560000	.	.	.	.	0,255,255	25	7.64018	7.68621	9.51113	7.70886	0.00104481	0.000907121	0.0150571	0.00146635	1	71890000	72550000	0
G	13	96660000	96680000	13	97600000	97620000	.	.	.	.	0,255,255	24	7.71678	5.68072	7.14688	6.00794	0.00237187	0.000168501	0.00347037	0.000284893	1	96670000	97610000	0
G	13	22200000	22220000	13	23880000	23900000	.	.	.	.	0,255,255	24	7.26367	5.47156	7.17005	7.73711	0.00237187	0.000168501	0.00347037	0.00338776	1	22210000	23890000	0
G	13	50220000	50240000	13	51640000	51660000	.	.	.	.	0,255,255	23	6.90679	4.70258	7.05919	6.09928	0.00527697	2.80067e-05	0.00775376	0.000825864	1	50230000	51650000	0
G	13	30720000	30740000	13	31600000	31620000	.	.	.	.	0,255,255	23	7.04123	5.84731	7.23143	7.49214	0.00527697	0.000504587	0.00775376	0.00745358	2	30720000	31610000	10000
G	13	105380000	105400000	13	107820000	107840000	.	.	.	.	0,255,255	16	3.13655	2.72875	2.00501	3.41948	0.000950508	0.00214482	0.000255833	0.0147478	1	105390000	107830000	0
G	13	50280000	50300000	13	51920000	51940000	.	.	.	.	0,255,255	14	2.29398	2.07402	1.99807	2.1057	0.00192621	0.00395687	0.00462557	0.00400396	1	50290000	51930000	0
G	14	96560000	96580000	14	96720000	96740000	.	.	.	.	0,255,255	115	42.5709	35.0182	45.1651	45.0947	2.52883e-12	1.19933e-18	4.01308e-12	3.60606e-12	2	96570000	96740000	10000
G	14	77360000	77380000	14	77520000	77540000	.	.	.	.	0,255,255	115	43.733	33.9968	33.9711	34.9147	2.52883e-12	1.19933e-18	1.62677e-18	2.72139e-18	8	77362500	77535000	37165
G	14	24800000	24820000	14	24900000	24920000	.	.	.	.	0,255,255	115	54.6984	35.3291	43.8395	41.9021	1.83636e-07	1.19933e-18	4.01308e-12	3.60606e-12	3	24796666	24903333	14908
G	14	59580000	59600000	14	59900000	59920000	.	.	.	.	0,255,255	107	25.0706	17.6932	20.7614	28.4844	1.12808e-21	2.02968e-37	4.48532e-29	9.38131e-22	7	59610000	59904285	40406
G	14	73760000	73780000	14	73920000	73940000	.	.	.	.	0,255,255	105	51.16	41.0086	36.1174	50.1244	3.05526e-05	3.66673e-09	1.82613e-14	8.81864e-05	5	73766000	73934000	33941
G	14	75380000	75400000	14	75540000	75560000	.	.	.	.	0,255,255	104	41.6101	36.5361	41.5818	46.3162	6.11408e-09	3.2898e-14	1.06492e-08	1.00041e-08	4	75390000	75555000	20616
G	14	73960000	73980000	14	74080000	74100000	.	.	.	.	0,255,255	104	44.2176	40.29	52.7064	42.605	6.11408e-09	7.05577e-09	0.000130352	1.00041e-08	3	73976666	74096666	14907
G	14	72980000	73000000	14	73360000	73380000	.	.	.	.	0,255,255	104	19.176	15.1781	26.4584	20.8696	8.35722e-35	0	2.90716e-20	5.14529e-27	9	72987777	73396666	37778
G	14	69440000	69460000	14	69540000	69560000	.	.	.	.	0,255,255	104	43.1187	42.3019	41.2404	49.2804	6.11408e-09	7.05577e-09	1.06492e-08	0.00013932	2	69440000	69560000	14142
G	14	75600000	75620000	14	75760000	75780000	.	.	.	.	0,255,255	100	47.0491	29.1424	31.4681	27.0629	7.75164e-08	1.06022e-18	1.30618e-12	2.04371e-18	5	75610000	75750000	28284
G	14	99980000	100000000	14	100080000	100100000	.	.	.	.	0,255,255	99	44.3214	31.0231	44.788	31.6036	1.36224e-07	2.2037e-12	2.54979e-07	3.06842e-12	3	99990000	100110000	20000
G	14	100440000	100460000	14	100560000	100580000	.	.	.	.	0,255,255	98	35.6153	35.4686	40.8648	41.4084	6.26913e-12	4.93788e-12	4.66075e-07	4.5895e-07	1	100450000	100570000	0
G	14	74820000	74840000	14	74940000	74960000	.	.	.	.	0,255,255	98	39.9304	35.1775	36.2679	34.6873	2.50038e-07	4.93788e-12	6.51037e-12	7.07922e-12	4	74825000	74940000	33541
G	14	64800000	64820000	14	64940000	64960000	.	.	.	.	0,255,255	97	42.5373	32.0778	36.113	28.5385	4.42522e-07	1.11245e-11	1.46903e-11	5.06003e-17	4	64815000	64950000	20616
G	14	71280000	71300000	14	71420000	71440000	.	.	.	.	0,255,255	96	29.3549	26.8066	34.6496	34.1374	1.50496e-16	7.29543e-17	3.41397e-11	3.59804e-11	2	71300000	71420000	14142
G	14	70040000	70060000	14	70180000	70200000	.	.	.	.	0,255,255	96	36.0628	30.4589	27.025	44.0228	3.1391e-11	7.29543e-17	1.3373e-16	1.39195e-06	5	70054000	70190000	25612
G	14	50320000	50340000	14	50560000	50580000	.	.	.	.	0,255,255	94	27.3571	20.9505	29.9243	24.6945	1.09138e-15	5.65543e-22	9.56808e-16	1.05403e-15	5	50342000	50566000	25298
G	14	81720000	81740000	14	81920000	81940000	.	.	.	.	0,255,255	93	30.4727	24.4323	26.3345	27.8771	2.84131e-15	1.79613e-21	2.52175e-15	2.7465e-15	6	81740000	81913333	34319
G	14	52240000	52260000	14	52440000	52460000	.	.	.	.	0,255,255	91	47.4507	38.7368	39.3701	46.5327	1.21658e-05	1.24945e-09	2.26677e-05	2.08938e-05	4	52270000	52440000	22361
G	14	50780000	50800000	14	50980000	51000000	.	.	.	.	0,255,255	90	32.5613	30.6697	41.0569	37.1302	3.22381e-09	3.03902e-14	3.79139e-05	3.92367e-09	1	50790000	50990000	0
G	14	31440000	31460000	14	31540000	31560000	.	.	.	.	0,255,255	89	45.9109	39.3492	46.6349	42.7969	3.30882e-05	5.16057e-05	6.2416e-05	5.89229e-05	3	31456666	31563333	14908
G	14	93400000	93420000	14	93600000	93620000	.	.	.	.	0,255,255	88	30.0754	24.6047	24.2124	31.0967	3.53047e-13	2.07272e-13	1.61393e-18	1.67142e-08	6	93420000	93610000	22361
G	14	67620000	67640000	14	67740000	67760000	.	.	.	.	0,255,255	87	35.3219	29.7059	36.1552	29.8061	2.75055e-08	5.22644e-13	3.11128e-08	9.08633e-13	3	67636666	67756666	14907
G	14	61920000	61940000	14	62180000	62200000	.	.	.	.	0,255,255	87	31.4393	26.1174	39.867	33.7106	2.75055e-08	5.22644e-13	0.000162833	3.36668e-08	5	61930000	62210000	40000
G	14	52480000	52500000	14	52580000	52600000	.	.	.	.	0,255,255	87	33.6399	30.2171	34.6999	36.6761	2.75055e-08	5.22644e-13	3.11128e-08	3.36668e-08	3	52490000	52596666	24037
G	14	51760000	51780000	14	52120000	52140000	.	.	.	.	0,255,255	85	29.279	28.3421	43.1754	31.7293	5.3216e-12	3.27248e-12	0.000413397	1.32769e-07	1	51770000	52130000	0
G	14	69700000	69720000	14	69820000	69840000	.	.	.	.	0,255,255	82	35.253	33.5118	34.8335	36.8521	7.82539e-07	6.60112e-07	9.01319e-07	9.45706e-07	1	69710000	69830000	0
G	14	68400000	68420000	14	68700000	68720000	.	.	.	.	0,255,255	81	27.8913	24.9414	34.0125	27.8414	1.79317e-10	1.10895e-10	1.70907e-06	1.95598e-10	2	68410000	68700000	10000
G	14	104040000	104060000	14	104140000	104160000	.	.	.	.	0,255,255	80	38.4979	30.9267	41.4076	37.8334	2.7694e-06	2.39752e-06	0.00361061	3.3723e-06	1	104050000	104150000	0
G	14	61900000	61920000	14	62280000	62300000	.	.	.	.	0,255,255	80	32.7882	21.7898	27.5212	21.8724	2.7694e-06	5.77069e-15	3.93559e-10	1.13478e-14	5	61918000	62290000	23324
G	14	51740000	51760000	14	52240000	52260000	.	.	.	.	0,255,255	79	31.5205	24.0021	39.1495	25.2595	5.05759e-06	1.69664e-14	0.00535045	1.04225e-09	4	51725000	52245000	35355
G	14	34140000	34160000	14	34240000	34260000	.	.	.	.	0,255,255	79	41.8529	37.6115	40.2114	38.3811	0.00287589	4.39614e-06	0.00535045	6.24902e-06	2	34140000	34250000	10000
G	14	103540000	103560000	14	103740000	103760000	.	.	.	.	0,255,255	78	31.5353	27.2528	31.611	36.2929	8.97671e-06	1.40671e-09	1.08232e-05	1.12914e-05	5	103554000	103766000	33941
G	14	71080000	71100000	14	71180000	71200000	.	.	.	.	0,255,255	77	35.8922	30.2888	36.5858	30.5628	1.59843e-05	3.20132e-09	1.96817e-05	5.32748e-09	1	71090000	71190000	0
G	14	69360000	69380000	14	69560000	69580000	.	.	.	.	0,255,255	76	33.6485	24.0893	21.0237	35.7137	2.86164e-05	3.91725e-13	6.74831e-13	3.48203e-05	3	69350000	69570000	20000
G	14	60520000	60540000	14	60640000	60660000	.	.	.	.	0,255,255	76	29.3257	26.2875	25.7571	24.2305	1.07891e-08	7.13798e-09	1.05105e-08	7.13829e-13	2	60530000	60640000	10000
G	14	65260000	65280000	14	65360000	65380000	.	.	.	.	0,255,255	75	27.0021	24.3409	24.8311	27.8835	2.33694e-08	1.07987e-12	2.28366e-08	2.62619e-08	1	65270000	65370000	0
G	14	51740000	51760000	14	52180000	52200000	.	.	.	.	0,255,255	75	27.8265	21.2215	33.4449	21.0318	2.33694e-08	1.07987e-12	6.19748e-05	1.99703e-12	1	51750000	52190000	0
G	14	91640000	91660000	14	91740000	91760000	.	.	.	.	0,255,255	74	28.8095	22.0475	26.578	24.7663	5.21203e-08	2.98989e-12	5.01433e-08	5.71658e-08	4	91650000	91760000	22361
G	14	55900000	55920000	14	56060000	56080000	.	.	.	.	0,255,255	74	36.9578	31.0856	38.854	26.5521	8.80744e-05	8.02951e-05	0.000109382	5.71658e-08	2	55910000	56090000	20000
G	14	100180000	100200000	14	100360000	100380000	.	.	.	.	0,255,255	73	25.3761	24.7873	30.8363	31.1803	1.10855e-07	7.53725e-08	1.0945e-07	0.000186341	7	100167142	100355714	43237
G	14	67880000	67900000	14	68040000	68060000	.	.	.	.	0,255,255	73	34.0172	26.8949	30.6296	26.3337	0.000149944	7.53725e-08	1.0945e-07	1.21966e-07	2	67890000	68040000	10000
G	14	75760000	75780000	14	75940000	75960000	.	.	.	.	0,255,255	72	28.4046	23.6714	25.0115	26.9056	2.3085e-07	2.15474e-11	2.3245e-07	2.52549e-07	1	75770000	75950000	0
G	14	68380000	68400000	14	69280000	69300000	.	.	.	.	0,255,255	72	12.9186	12.0951	14.4549	23.8668	2.54923e-20	6.83766e-26	3.3978e-20	3.81044e-11	14	68371428	69285714	61577
G	14	59100000	59120000	14	59480000	59500000	.	.	.	.	0,255,255	72	20.5083	21.3106	24.644	29.4369	3.31543e-11	2.15474e-11	2.3245e-07	2.52549e-07	1	59110000	59490000	0
G	14	55020000	55040000	14	55200000	55220000	.	.	.	.	0,255,255	72	34.1535	34.2314	47.0227	32.9267	0.000252126	0.000235062	0.0598708	0.000317573	4	55020000	55235000	33541
G	14	52780000	52800000	14	52920000	52940000	.	.	.	.	0,255,255	72	32.8462	32.7748	40.777	35.7876	0.000252126	0.000235062	0.0598708	0.000317573	3	52776666	52936666	14907
G	14	75780000	75800000	14	75980000	76000000	.	.	.	.	0,255,255	70	26.7258	24.2845	35.8804	25.6053	9.75859e-07	1.43986e-10	0.000872603	1.07425e-06	1	75790000	75990000	0
G	14	65640000	65660000	14	65860000	65880000	.	.	.	.	0,255,255	70	26.9827	23.3495	25.9988	27.8913	9.75859e-07	1.43986e-10	9.78558e-07	1.07425e-06	3	65656666	65876666	33994
G	14	58960000	58980000	14	59480000	59500000	.	.	.	.	0,255,255	70	20.0794	18.2945	25.0852	26.0688	2.14992e-10	5.94143e-15	9.78558e-07	1.07425e-06	4	58975000	59520000	33541
G	14	100860000	100880000	14	101100000	101120000	.	.	.	.	0,255,255	68	30.3298	25.2368	32.2619	26.9895	3.92347e-06	2.77938e-06	0.00227662	4.27063e-06	4	100860000	101125000	26926
G	14	69040000	69060000	14	69240000	69260000	.	.	.	.	0,255,255	68	26.1201	26.5808	27.4848	38.6915	3.92347e-06	2.77938e-06	3.97022e-06	0.0022226	2	69040000	69250000	10000
G	14	32540000	32560000	14	32700000	32720000	.	.	.	.	0,255,255	68	28.8403	26.8135	26.6261	29.6105	3.92347e-06	2.77938e-06	3.97022e-06	4.27063e-06	2	32550000	32700000	10000
G	14	25280000	25300000	14	25480000	25500000	.	.	.	.	0,255,255	68	30.6632	31.3355	37.8177	37.7834	3.92347e-06	0.00170961	0.00227662	0.0022226	2	25280000	25500000	14142
G	14	94500000	94520000	14	94600000	94620000	.	.	.	.	0,255,255	67	33.3042	25.8635	26.2387	28.1148	0.00268268	5.41443e-06	7.76416e-06	8.29098e-06	1	94510000	94610000	0
G	14	75060000	75080000	14	75260000	75280000	.	.	.	.	0,255,255	67	29.1213	26.9135	25.3532	35.2767	7.53889e-06	5.41443e-06	7.76416e-06	0.00349546	1	75070000	75270000	0
G	14	35580000	35600000	14	35880000	35900000	.	.	.	.	0,255,255	67	26.909	22.164	24.8972	33.1234	7.53889e-06	2.24195e-09	7.76416e-06	0.00349546	3	35596666	35883333	14908
G	14	76240000	76260000	14	76420000	76440000	.	.	.	.	0,255,255	66	24.4051	25.3303	29.0377	32.9097	7.77681e-09	1.06205e-05	1.50762e-05	0.00542433	4	76215000	76440000	36401
G	14	64260000	64280000	14	64760000	64780000	.	.	.	.	0,255,255	66	14.7318	13.4186	17.4841	22.8389	7.83119e-17	2.52358e-17	1.59632e-12	8.5386e-09	9	64274444	64758888	37252
G	14	61980000	62000000	14	62160000	62180000	.	.	.	.	0,255,255	66	27.9993	32.1794	33.4691	37.5486	1.47347e-05	0.00416413	0.00560357	0.00542433	1	61990000	62170000	0
G	14	54420000	54440000	14	54640000	54660000	.	.	.	.	0,255,255	66	25.2569	24.7747	25.1972	26.7021	1.47347e-05	1.06205e-05	1.50762e-05	1.61461e-05	1	54430000	54650000	0
G	14	25280000	25300000	14	25600000	25620000	.	.	.	.	0,255,255	65	20.3165	21.0816	29.0973	27.3348	1.87314e-08	1.32405e-08	2.90589e-05	3.06207e-05	5	25262000	25626000	40000
G	14	22860000	22880000	14	23020000	23040000	.	.	.	.	0,255,255	65	28.459	22.4113	28.7316	24.0622	2.79503e-05	1.32405e-08	2.90589e-05	2.0316e-08	2	22860000	23030000	10000
G	14	64480000	64500000	14	64760000	64780000	.	.	.	.	0,255,255	64	23.8912	20.3475	20.9662	30.1646	4.21573e-08	3.04283e-08	4.47354e-08	5.7447e-05	3	64490000	64770000	20000
G	14	64100000	64120000	14	64220000	64240000	.	.	.	.	0,255,255	64	33.6425	28.8573	30.093	30.3038	0.00934579	3.92441e-05	5.40182e-05	5.7447e-05	1	64110000	64230000	0
G	14	54980000	55000000	14	55260000	55280000	.	.	.	.	0,255,255	63	27.2151	20.47	25.4226	18.9021	9.47612e-05	7.08708e-08	9.95566e-05	3.69274e-11	1	54990000	55270000	0
G	14	23020000	23040000	14	23320000	23340000	.	.	.	.	0,255,255	63	23.2279	20.601	28.4045	22.0721	9.58217e-08	7.08708e-08	9.95566e-05	1.06197e-07	4	23050000	23320000	22361
G	14	68300000	68320000	14	69300000	69320000	.	.	.	.	0,255,255	62	20.3348	11.8189	11.5951	22.3172	2.14684e-07	4.30008e-19	1.60314e-18	2.41778e-07	1	68310000	69310000	0
G	14	104280000	104300000	14	104440000	104460000	.	.	.	.	0,255,255	61	18.5578	20.8427	26.1476	21.4827	2.06693e-10	3.62896e-07	0.000323304	5.40841e-07	2	104280000	104450000	10000
G	14	62380000	62400000	14	62580000	62600000	.	.	.	.	0,255,255	61	23.5026	21.4915	24.8631	30.1118	4.82819e-07	3.62896e-07	0.000323304	0.000343992	6	62373333	62596666	37268
G	14	61080000	61100000	14	61740000	61760000	.	.	.	.	0,255,255	61	17.9504	12.4783	16.1919	16.472	2.06693e-10	1.56449e-14	2.71741e-10	2.93325e-10	9	61103333	61730000	42164
G	14	56160000	56180000	14	56800000	56820000	.	.	.	.	0,255,255	61	15.3486	19.5012	29.524	21.8566	4.94917e-14	1.18825e-10	0.000323304	5.40841e-07	2	56180000	56810000	10000
G	14	30020000	30040000	14	30680000	30700000	.	.	.	.	0,255,255	61	12.7271	11.8621	17.9946	15.8236	4.94917e-14	1.85491e-18	2.71741e-10	2.93325e-10	6	30030000	30683333	38873
G	14	105380000	105400000	14	105500000	105520000	.	.	.	.	0,255,255	60	27.3412	26.8413	25.686	36.5525	0.000530416	0.000422253	0.00056884	0.0551174	2	105390000	105520000	10000
G	14	96460000	96480000	14	96740000	96760000	.	.	.	.	0,255,255	58	22.6583	18.7812	16.4164	29.4801	4.76563e-06	2.36574e-09	5.26961e-09	0.00174852	2	96470000	96760000	10000
G	14	29220000	29240000	14	30000000	30020000	.	.	.	.	0,255,255	58	13.7797	8.9954	14.2166	11.1123	1.8658e-12	9.91667e-21	2.26637e-12	4.8523e-16	7	29232857	29995714	30905
G	14	68720000	68740000	14	69240000	69260000	.	.	.	.	0,255,255	56	16.4586	15.9212	18.8921	22.8243	2.45818e-08	1.63668e-08	3.38837e-08	2.22721e-05	5	68726000	69262000	32249
G	14	63620000	63640000	14	63740000	63760000	.	.	.	.	0,255,255	56	26.7897	24.0892	27.0981	24.7094	0.0038976	1.62794e-05	0.00457112	0.00478933	1	63630000	63750000	0
G	14	21680000	21700000	14	21860000	21880000	.	.	.	.	0,255,255	56	24.0768	19.941	22.0998	14.6756	2.07147e-05	1.62794e-05	2.24859e-05	2.0811e-11	2	21690000	21860000	10000
G	14	91360000	91380000	14	91600000	91620000	.	.	.	.	0,255,255	55	25.1687	23.7745	30.0763	27.3021	0.00626236	3.28787e-05	0.00739121	0.0077231	4	91375000	91630000	20616
G	14	61100000	61120000	14	61480000	61500000	.	.	.	.	0,255,255	55	15.8357	14.3769	20.5577	15.611	6.17834e-08	2.09115e-11	4.51669e-05	9.32317e-08	5	61102000	61474000	25298
G	14	39580000	39600000	14	39820000	39840000	.	.	.	.	0,255,255	55	21.4784	17.1942	20.0561	20.5123	4.13568e-05	4.18345e-08	4.51669e-05	4.50358e-05	7	39595714	39847142	43237
G	14	24440000	24460000	14	24540000	24560000	.	.	.	.	0,255,255	55	20.6366	18.0091	25.0175	19.9039	4.13568e-05	4.18345e-08	0.00739121	4.50358e-05	1	24450000	24550000	0
G	14	76160000	76180000	14	76440000	76460000	.	.	.	.	0,255,255	54	24.12	18.0436	20.0688	24.2874	8.1495e-05	1.04202e-07	8.99009e-05	8.85175e-05	1	76170000	76450000	0
G	14	56180000	56200000	14	56560000	56580000	.	.	.	.	0,255,255	54	18.1921	16.7964	22.1734	17.235	1.51756e-07	1.04202e-07	8.99009e-05	2.26734e-07	2	56180000	56570000	10000
G	14	32720000	32740000	14	33020000	33040000	.	.	.	.	0,255,255	54	24.0882	19.6897	24.2107	18.9336	8.1495e-05	6.58375e-05	8.99009e-05	2.26734e-07	1	32730000	33030000	0
G	14	55700000	55720000	14	55880000	55900000	.	.	.	.	0,255,255	53	27.8084	22.7019	26.7728	23.1775	0.0149326	0.000128764	0.0180269	0.000171253	2	55690000	55890000	20000
G	14	25200000	25220000	14	25600000	25620000	.	.	.	.	0,255,255	53	19.6125	16.7634	21.4596	21.617	0.000153399	2.53183e-07	0.000172868	0.000171253	2	25210000	25620000	10000
G	14	56180000	56200000	14	56880000	56900000	.	.	.	.	0,255,255	52	18.777	17.008	24.3505	21.8454	8.70981e-07	6.06736e-07	0.000323203	0.000323183	5	56190000	56898000	23324
G	14	102220000	102240000	14	102420000	102440000	.	.	.	.	0,255,255	51	28.8915	22.2812	30.6105	19.308	0.0329175	0.000458087	0.0409719	2.92358e-06	2	102240000	102420000	14142
G	14	77920000	77940000	14	78180000	78200000	.	.	.	.	0,255,255	51	20.6919	15.4512	15.8394	18.7777	0.000524585	1.73056e-09	2.77709e-06	2.92358e-06	1	77930000	78190000	0
G	14	70280000	70300000	14	70480000	70500000	.	.	.	.	0,255,255	51	21.9008	17.4888	23.4022	17.3103	0.000524585	1.42248e-06	0.000589075	2.92358e-06	2	70300000	70490000	10000
G	14	90860000	90880000	14	91160000	91180000	.	.	.	.	0,255,255	50	15.2462	16.3321	18.6372	20.9991	1.17599e-08	3.25008e-06	6.1456e-06	0.00108281	3	90850000	91176666	21082
G	14	76520000	76540000	14	76820000	76840000	.	.	.	.	0,255,255	50	14.2019	13.2127	16.279	16.2845	1.17599e-08	4.98159e-09	6.1456e-06	6.46841e-06	6	76526666	76826666	23571
G	14	38160000	38180000	14	38340000	38360000	.	.	.	.	0,255,255	50	28.2796	22.8732	22.3247	22.805	0.0472861	0.000843356	0.00107508	0.00108281	2	38180000	38340000	14142
G	14	92600000	92620000	14	92920000	92940000	.	.	.	.	0,255,255	49	19.1072	16.5041	22.4915	15.5734	1.01876e-05	7.45621e-06	0.00192536	1.4518e-05	4	92600000	92920000	14142
G	14	91360000	91380000	14	91720000	91740000	.	.	.	.	0,255,255	49	14.4604	14.8765	22.2137	14.0142	3.23588e-08	1.39651e-08	0.00192536	4.0091e-08	2	91370000	91740000	10000
G	14	71780000	71800000	14	72180000	72200000	.	.	.	.	0,255,255	49	18.7751	18.468	20.4153	25.0918	1.01876e-05	7.45621e-06	0.00192536	0.0879148	2	71790000	72200000	10000
G	14	71600000	71620000	14	72220000	72240000	.	.	.	.	0,255,255	49	16.1504	14.6551	20.8363	18.001	1.01876e-05	1.39651e-08	0.00192536	1.4518e-05	4	71600000	72205000	33541
G	14	67080000	67100000	14	67580000	67600000	.	.	.	.	0,255,255	49	15.2128	14.2766	17.3592	21.1991	3.23588e-08	1.39651e-08	1.3523e-05	0.00193903	3	67096666	67610000	24037
G	14	64260000	64280000	14	64460000	64480000	.	.	.	.	0,255,255	49	27.4347	24.225	27.111	27.2553	0.0667453	0.00151719	0.0853215	0.0879148	2	64270000	64490000	20000
G	14	61180000	61200000	14	61700000	61720000	.	.	.	.	0,255,255	49	12.9925	14.3552	14.6057	23.986	3.23588e-08	1.39651e-08	4.236e-08	0.00193903	1	61190000	61710000	0
G	14	38440000	38460000	14	38660000	38680000	.	.	.	.	0,255,255	49	18.4849	17.9586	20.0592	22.998	1.01876e-05	7.45621e-06	0.00192536	0.00193903	1	38450000	38670000	0
G	14	29460000	29480000	14	29980000	30000000	.	.	.	.	0,255,255	49	15.9295	14.6578	14.3403	22.5184	1.01876e-05	1.39651e-08	4.236e-08	0.00193903	2	29480000	29990000	10000
G	14	59100000	59120000	14	59560000	59580000	.	.	.	.	0,255,255	48	19.3174	18.3808	23.1604	19.1759	2.20925e-05	1.62498e-05	0.00334899	3.09954e-05	1	59110000	59570000	0
G	14	35900000	35920000	14	36120000	36140000	.	.	.	.	0,255,255	48	16.5022	14.5829	18.4764	18.1292	2.20925e-05	3.8396e-08	2.86589e-05	3.09954e-05	2	35910000	36140000	10000
G	14	24120000	24140000	14	24400000	24420000	.	.	.	.	0,255,255	48	21.4331	17.2478	19.783	22.5044	0.00288262	1.62498e-05	0.00334899	0.0033844	1	24130000	24410000	0
G	14	81440000	81460000	14	81660000	81680000	.	.	.	.	0,255,255	47	21.4105	17.508	20.1597	12.1973	0.00482765	3.51663e-05	0.00573833	7.58335e-10	1	81450000	81670000	0
G	14	38360000	38380000	14	39340000	39360000	.	.	.	.	0,255,255	47	12.8826	14.9645	20.2753	16.6835	2.24791e-07	1.04834e-07	0.00573833	6.56083e-05	3	38376666	39336666	14907
G	14	30020000	30040000	14	30460000	30480000	.	.	.	.	0,255,255	47	14.2208	12.8592	19.557	14.9663	2.24791e-07	1.04834e-07	6.11853e-05	2.82774e-07	2	30020000	30470000	10000
G	14	36520000	36540000	14	36840000	36860000	.	.	.	.	0,255,255	46	14.665	16.3244	16.6602	21.7731	5.81933e-07	7.4784e-05	0.000127292	0.00974696	2	36520000	36840000	14142
G	14	34300000	34320000	14	34560000	34580000	.	.	.	.	0,255,255	46	15.6334	14.2168	18.7244	14.8006	9.80026e-05	2.78173e-07	0.000127292	7.29688e-07	2	34310000	34560000	10000
G	14	90440000	90460000	14	90680000	90700000	.	.	.	.	0,255,255	45	23.8345	16.515	17.7779	21.5062	0.0127874	0.000152855	0.000252743	0.0160173	2	90440000	90690000	10000
G	14	89880000	89900000	14	90360000	90380000	.	.	.	.	0,255,255	45	12.9327	12.3631	13.57	19.4399	1.46906e-06	2.54159e-09	1.85669e-06	0.000268835	2	89880000	90380000	14142
G	14	83760000	83780000	14	83920000	83940000	.	.	.	.	0,255,255	45	20.9206	19.4168	17.5407	19.0711	0.0127874	0.000152855	0.000252743	0.000268835	2	83780000	83930000	10000
G	14	79400000	79420000	14	81320000	81340000	.	.	.	.	0,255,255	45	8.74798	7.72137	11.908	8.41299	9.66079e-12	5.89046e-15	7.32373e-09	1.09117e-11	3	79403333	81330000	24037
G	14	73020000	73040000	14	73320000	73340000	.	.	.	.	0,255,255	45	15.1282	17.5128	22.1357	18.1463	1.46906e-06	0.000152855	0.0157673	0.000268835	1	73030000	73330000	0
G	14	65880000	65900000	14	66280000	66300000	.	.	.	.	0,255,255	45	11.637	11.6723	14.8278	13.1889	5.28339e-09	2.54159e-09	1.85669e-06	1.78501e-06	2	65880000	66290000	10000
G	14	60840000	60860000	14	61020000	61040000	.	.	.	.	0,255,255	45	19.6817	18.9565	20.2087	21.2741	0.0127874	0.000152855	0.0157673	0.0160173	3	60836666	61036666	14907
G	14	54420000	54440000	14	54800000	54820000	.	.	.	.	0,255,255	45	16.8401	16.1929	18.5593	22.2704	0.000197235	0.000152855	0.000252743	0.0160173	1	54430000	54810000	0
G	14	54000000	54020000	14	54800000	54820000	.	.	.	.	0,255,255	45	16.4049	13.7352	15.267	22.9767	0.000197235	7.21584e-07	1.85669e-06	0.0160173	2	54010000	54790000	20000
G	14	38380000	38400000	14	38660000	38680000	.	.	.	.	0,255,255	45	18.7153	14.7527	16.8573	19.1274	0.000197235	7.21584e-07	0.000252743	0.000268835	3	38376666	38676666	14907
G	14	37700000	37720000	14	38020000	38040000	.	.	.	.	0,255,255	45	18.0869	16.2812	22.8145	16.9275	0.000197235	0.000152855	0.0157673	0.000268835	1	37710000	38030000	0
G	14	37120000	37140000	14	37580000	37600000	.	.	.	.	0,255,255	45	11.0217	12.6056	15.273	20.131	5.28339e-09	7.21584e-07	1.85669e-06	0.0160173	3	37116666	37610000	24037
G	14	89120000	89140000	14	89460000	89480000	.	.	.	.	0,255,255	44	15.892	13.8327	17.9414	17.445	0.000390762	1.82292e-06	0.000497374	0.00053038	2	89130000	89480000	10000
G	14	92600000	92620000	14	93120000	93140000	.	.	.	.	0,255,255	43	10.0114	11.6155	19.7821	11.9295	4.61576e-08	2.36443e-08	0.0397036	6.80604e-08	2	92600000	93140000	14142
G	14	78320000	78340000	14	79020000	79040000	.	.	.	.	0,255,255	43	7.31919	8.52323	11.2078	9.93417	1.19825e-13	6.09127e-11	6.73291e-08	6.80604e-08	1	78330000	79030000	0
G	14	62640000	62660000	14	63740000	63760000	.	.	.	.	0,255,255	43	10.3954	9.65056	16.1788	10.8042	4.61576e-08	6.09127e-11	0.000954867	6.80604e-08	4	62645000	63750000	40311
G	14	35120000	35140000	14	35440000	35460000	.	.	.	.	0,255,255	43	16.1902	16.8769	21.2157	20.5185	0.000750272	0.000614612	0.0397036	0.0396147	2	35140000	35450000	10000
G	14	85720000	85740000	14	85980000	86000000	.	.	.	.	0,255,255	42	17.8147	16.9276	17.1686	19.6729	0.00142013	0.00118991	0.00179882	0.0606015	2	85710000	85990000	20000
G	14	38680000	38700000	14	39060000	39080000	.	.	.	.	0,255,255	42	13.2295	13.3819	17.2965	16.2665	1.96447e-05	1.08279e-05	0.00179882	0.00192477	2	38680000	39070000	10000
G	14	37700000	37720000	14	38340000	38360000	.	.	.	.	0,255,255	42	12.3914	8.65374	14.1339	9.40765	1.96447e-05	2.19075e-10	2.47874e-05	6.00416e-10	5	37726000	38334000	33941
G	14	61520000	61540000	14	61700000	61720000	.	.	.	.	0,255,255	41	14.5126	13.3698	13.6615	18.729	4.37473e-05	2.57519e-05	5.54908e-05	0.00353111	1	61530000	61710000	0
G	14	95140000	95160000	14	95560000	95580000	.	.	.	.	0,255,255	40	13.4973	12.4052	13.4787	11.7747	9.61479e-05	5.92051e-05	0.000121738	1.42612e-06	2	95160000	95560000	14142
G	14	89480000	89500000	14	90360000	90380000	.	.	.	.	0,255,255	40	14.6522	11.7475	16.572	14.307	9.61479e-05	5.72177e-07	0.00600568	0.000124889	4	89500000	90385000	26926
G	14	54040000	54060000	14	54240000	54260000	.	.	.	.	0,255,255	40	14.7585	16.6098	17.6408	19.2688	9.61479e-05	0.00408138	0.00600568	0.006275	1	54050000	54250000	0
G	14	50780000	50800000	14	51240000	51260000	.	.	.	.	0,255,255	40	10.5328	10.8356	15.2708	13.3337	9.87901e-07	5.72177e-07	0.000121738	0.000124889	1	50790000	51250000	0
G	14	31960000	31980000	14	32720000	32740000	.	.	.	.	0,255,255	40	10.744	13.0737	18.3078	15.2052	9.87901e-07	5.92051e-05	0.00600568	0.000124889	1	31970000	32730000	0
G	14	95180000	95200000	14	95540000	95560000	.	.	.	.	0,255,255	39	15.7791	14.9244	17.7353	15.0761	0.00811595	0.000132649	0.0106154	0.000269024	1	95190000	95550000	0
G	14	39180000	39200000	14	39480000	39500000	.	.	.	.	0,255,255	39	12.9988	10.9072	14.8216	12.985	0.000204354	1.56981e-06	0.000261891	0.000269024	1	39190000	39490000	0
G	14	89500000	89520000	14	89860000	89880000	.	.	.	.	0,255,255	38	12.7742	12.44	18.9149	12.8367	0.000420835	0.000288967	0.0181262	0.000568928	1	89510000	89870000	0
G	14	79420000	79440000	14	80000000	80020000	.	.	.	.	0,255,255	38	14.6965	12.6824	17.8556	12.9781	0.000420835	0.000288967	0.0181262	0.000568928	1	79430000	80010000	0
G	14	78900000	78920000	14	79160000	79180000	.	.	.	.	0,255,255	38	12.1388	13.222	15.3424	17.5899	6.93499e-06	0.000288967	0.000546816	0.0186876	1	78910000	79170000	0
G	14	75600000	75620000	14	75940000	75960000	.	.	.	.	0,255,255	38	9.76368	10.3755	14.2604	17.4532	6.44935e-08	4.20506e-06	0.000546816	0.0186876	3	75596666	75963333	27488
G	14	65620000	65640000	14	66280000	66300000	.	.	.	.	0,255,255	38	7.56333	8.08864	14.4451	8.49949	2.47096e-10	3.29852e-08	0.000546816	8.66825e-08	2	65630000	66280000	10000
G	14	33080000	33100000	14	34140000	34160000	.	.	.	.	0,255,255	37	7.54006	8.15755	10.548	8.2984	1.00432e-09	1.04619e-07	2.27931e-05	2.75208e-07	1	33090000	34150000	0
G	14	60100000	60120000	14	60360000	60380000	.	.	.	.	0,255,255	36	14.4636	15.3605	16.4462	16.8898	0.00167733	0.00125565	0.0485391	0.049841	2	60100000	60370000	10000
G	14	33040000	33060000	14	33400000	33420000	.	.	.	.	0,255,255	36	10.527	9.08194	13.5441	11.346	4.1741e-05	3.30057e-07	0.00221696	5.85598e-05	3	33050000	33410000	20000
G	14	96020000	96040000	14	96460000	96480000	.	.	.	.	0,255,255	35	15.3083	13.5645	17.4858	14.4395	0.00320255	0.00249891	0.0757675	0.00441072	2	96030000	96460000	10000
G	14	55900000	55920000	14	56940000	56960000	.	.	.	.	0,255,255	35	8.86703	6.76305	9.9768	8.66203	1.78912e-06	1.11309e-08	0.00012711	2.5818e-06	2	55910000	56940000	10000
G	14	34360000	34380000	14	34740000	34760000	.	.	.	.	0,255,255	35	13.5818	13.471	16.2562	13.9412	0.00320255	0.00249891	0.0757675	0.00441072	2	34370000	34760000	10000
G	14	33040000	33060000	14	33460000	33480000	.	.	.	.	0,255,255	35	11.6075	8.67492	13.5082	10.3125	9.7188e-05	1.02384e-06	0.00428755	0.00014012	1	33050000	33470000	0
G	14	104580000	104600000	14	105020000	105040000	.	.	.	.	0,255,255	34	8.99414	8.10704	9.36683	9.03451	4.92004e-06	3.07394e-06	7.24739e-06	7.55868e-06	6	104583333	105046666	45339
G	14	56960000	56980000	14	57780000	57800000	.	.	.	.	0,255,255	34	13.1524	9.67305	10.4603	15.4458	0.00592959	3.07394e-06	0.000292538	0.00826397	1	56970000	57790000	0
G	14	45360000	45380000	14	45700000	45720000	.	.	.	.	0,255,255	34	13.2346	9.40608	11.9448	11.5402	0.00592959	3.07394e-06	0.000292538	0.000313899	3	45376666	45723333	14908
G	14	58140000	58160000	14	58520000	58540000	.	.	.	.	0,255,255	33	11.2783	11.2109	12.5304	14.0179	0.000488567	0.000365593	0.0142996	0.0149253	2	58160000	58530000	10000
G	14	29240000	29260000	14	29680000	29700000	.	.	.	.	0,255,255	33	11.7092	12.0276	14.4909	13.2299	0.000488567	0.000365593	0.0142996	0.0149253	2	29240000	29690000	10000
G	14	34280000	34300000	14	34700000	34720000	.	.	.	.	0,255,255	32	9.89158	7.60475	10.5766	8.38564	0.00104296	4.36022e-07	0.00137869	5.27005e-05	2	34300000	34710000	10000
G	14	104540000	104560000	14	105100000	105120000	.	.	.	.	0,255,255	31	9.58349	6.21442	8.66116	7.39648	9.39173e-05	2.25362e-08	0.000127624	3.15818e-06	1	104550000	105110000	0
G	14	80520000	80540000	14	81300000	81320000	.	.	.	.	0,255,255	31	10.1186	9.06353	11.1078	12.9415	0.00214366	6.68908e-05	0.00285147	0.0444217	3	80523333	81303333	14907
G	14	91960000	91980000	14	92480000	92500000	.	.	.	.	0,255,255	30	10.2117	8.27688	11.7401	7.77152	0.00420595	0.000170239	0.00563215	1.02914e-05	1	91970000	92490000	0
G	14	60800000	60820000	14	61740000	61760000	.	.	.	.	0,255,255	30	3.98076	6.45234	7.16604	10.9531	6.80678e-10	4.93173e-06	9.58496e-06	0.00603059	2	60810000	61740000	10000
G	14	33040000	33060000	14	33900000	33920000	.	.	.	.	0,255,255	30	7.09312	5.65493	9.48848	6.14502	7.03825e-06	9.36396e-08	0.000317014	1.50814e-07	1	33050000	33910000	0
G	14	71100000	71120000	14	71440000	71460000	.	.	.	.	0,255,255	28	6.93392	6.30436	8.01611	9.20883	5.93932e-05	4.59852e-05	0.00163764	0.00179869	1	71110000	71450000	0
G	14	100840000	100860000	14	102080000	102100000	.	.	.	.	0,255,255	27	4.76329	5.26559	6.07664	8.8395	8.13737e-08	4.73567e-06	8.36177e-06	0.00380603	1	100850000	102090000	0
G	14	76540000	76560000	14	77100000	77120000	.	.	.	.	0,255,255	27	5.87928	6.31805	8.51282	7.12055	6.40377e-06	0.000129915	0.00356938	0.000217417	2	76540000	77110000	10000
G	14	33040000	33060000	14	34260000	34280000	.	.	.	.	0,255,255	27	10.9518	6.4774	9.34149	8.53453	0.0260795	0.000129915	0.00356938	0.00380603	2	33050000	34260000	10000
G	14	25180000	25200000	14	25880000	25900000	.	.	.	.	0,255,255	27	6.89846	5.9702	9.0768	6.14929	0.000162787	4.73567e-06	0.00356938	9.54141e-06	1	25190000	25890000	0
G	14	69400000	69420000	14	69800000	69820000	.	.	.	.	0,255,255	25	6.26151	6.61853	9.51899	6.94318	0.00104481	0.000907121	0.0150571	0.00146635	1	69410000	69810000	0
G	14	45900000	45920000	14	46800000	46820000	.	.	.	.	0,255,255	25	6.96287	5.98655	6.98559	6.33407	0.00104481	5.57657e-05	0.00148692	0.00146635	1	45910000	46810000	0
G	14	31960000	31980000	14	33020000	33040000	.	.	.	.	0,255,255	25	8.61332	8.12838	9.63319	8.4641	0.0106967	0.0104596	0.0150571	0.0156209	2	31960000	33020000	14142
G	14	104020000	104040000	14	104440000	104460000	.	.	.	.	0,255,255	24	7.60372	5.02341	6.87847	5.74625	0.00237187	0.000168501	0.00347037	0.000284893	1	104030000	104450000	0
G	14	61860000	61880000	14	62560000	62580000	.	.	.	.	0,255,255	23	4.76996	4.48855	5.95621	5.24953	2.34809e-05	2.80067e-05	0.000796119	0.000825864	3	61876666	62570000	33334
G	14	31540000	31560000	14	32940000	32960000	.	.	.	.	0,255,255	20	4.26321	4.07744	3.52715	5.94934	0.000932541	0.00114941	0.000125612	0.0124129	1	31550000	32950000	0
G	14	27720000	27740000	14	29060000	29080000	.	.	.	.	0,255,255	20	4.8565	4.68181	4.29026	5.07242	0.000932541	0.00114941	0.00157949	0.0124129	1	27730000	29070000	0
G	15	57620000	57640000	15	57820000	57840000	.	.	.	.	0,255,255	124	40.3428	28.7157	37.8919	35.7174	3.58283e-15	8.2282e-31	2.57085e-22	8.60147e-22	5	57634000	57822000	25298
G	15	78600000	78620000	15	78700000	78720000	.	.	.	.	0,255,255	117	45.0229	36.7097	45.9649	39.7703	5.72419e-13	1.8794e-19	1.02951e-12	7.78431e-13	2	78600000	78710000	10000
G	15	74420000	74440000	15	74580000	74600000	.	.	.	.	0,255,255	113	31.2442	33.5293	37.3295	48.9968	1.2902e-17	7.85758e-18	1.0454e-17	1.64079e-06	5	74410000	74602000	28000
G	15	71400000	71420000	15	71720000	71740000	.	.	.	.	0,255,255	113	32.2372	29.8979	33.6159	45.7753	1.2902e-17	5.10076e-25	1.0454e-17	1.61156e-11	1	71410000	71730000	0
G	15	75320000	75340000	15	75480000	75500000	.	.	.	.	0,255,255	111	30.1168	28.6464	37.2086	30.5461	1.24758e-23	5.66776e-24	6.78892e-17	9.74103e-24	4	75330000	75500000	22361
G	15	39460000	39480000	15	39560000	39580000	.	.	.	.	0,255,255	106	40.1368	43.089	40.2639	45.3638	1.58807e-09	1.8185e-09	2.65458e-09	2.60672e-09	2	39470000	39580000	10000
G	15	74920000	74940000	15	75040000	75060000	.	.	.	.	0,255,255	105	40.0076	33.1855	37.2716	39.0842	3.21908e-09	1.3781e-14	1.82613e-14	5.21373e-09	3	74930000	75050000	20000
G	15	90860000	90880000	15	91020000	91040000	.	.	.	.	0,255,255	100	40.543	37.0826	42.6319	39.2865	7.75164e-08	9.84283e-13	1.36433e-07	1.42736e-07	6	90866666	91013333	23571
G	15	90280000	90300000	15	90420000	90440000	.	.	.	.	0,255,255	100	44.9521	34.922	33.9678	40.4674	7.75164e-08	9.84283e-13	1.30618e-12	1.42736e-07	5	90298000	90414000	25298
G	15	89440000	89460000	15	89540000	89560000	.	.	.	.	0,255,255	97	44.9285	32.5374	39.9713	35.8852	4.42522e-07	1.11245e-11	8.4167e-07	1.61168e-11	2	89450000	89560000	10000
G	15	49160000	49180000	15	49260000	49280000	.	.	.	.	0,255,255	97	49.3401	43.2933	52.0809	44.1947	0.000872532	6.21913e-07	0.00230674	7.8504e-07	3	49156666	49263333	14908
G	15	81560000	81580000	15	81680000	81700000	.	.	.	.	0,255,255	96	33.9842	27.5436	35.0419	31.6856	3.1391e-11	7.29543e-17	3.41397e-11	3.59804e-11	1	81570000	81690000	0
G	15	101620000	101640000	15	101780000	101800000	.	.	.	.	0,255,255	95	34.0207	29.1478	30.7142	45.7025	6.73088e-11	1.99805e-16	3.50163e-16	2.4455e-06	6	101610000	101793333	40139
G	15	89600000	89620000	15	89700000	89720000	.	.	.	.	0,255,255	95	34.6414	34.3444	33.8013	39.5387	6.73088e-11	5.48368e-11	7.61779e-11	2.4455e-06	4	89600000	89720000	14142
G	15	51560000	51580000	15	51660000	51680000	.	.	.	.	0,255,255	95	39.9471	41.7828	42.4558	46.5305	1.42994e-06	2.0306e-06	2.57362e-06	2.4455e-06	1	51570000	51670000	0
G	15	32940000	32960000	15	33280000	33300000	.	.	.	.	0,255,255	94	22.4539	18.1955	27.9078	24.5494	1.02339e-21	9.87484e-29	9.56808e-16	1.26351e-21	5	32946000	33282000	32249
G	15	41200000	41220000	15	41300000	41320000	.	.	.	.	0,255,255	93	42.0165	36.4445	36.9631	41.1936	4.35991e-06	2.6554e-10	3.60882e-10	7.42203e-06	3	41203333	41316666	14908
G	15	81440000	81460000	15	81540000	81560000	.	.	.	.	0,255,255	92	31.7065	33.7027	32.0147	37.2213	6.97224e-10	5.80525e-10	7.80263e-10	8.46675e-10	2	81440000	81550000	10000
G	15	63560000	63580000	15	63680000	63700000	.	.	.	.	0,255,255	91	50.3725	43.7428	39.5841	48.8262	0.00748065	1.77783e-05	2.26677e-05	2.08938e-05	3	63583333	63696666	14908
G	15	51920000	51940000	15	52060000	52080000	.	.	.	.	0,255,255	91	41.1639	34.4034	38.4542	42.147	1.21658e-05	1.24945e-09	1.67747e-09	2.08938e-05	4	51950000	52065000	20616
G	15	64700000	64720000	15	64940000	64960000	.	.	.	.	0,255,255	90	37.9846	30.7175	38.2542	40.5129	3.22381e-09	3.03902e-14	3.56767e-09	3.54513e-05	6	64716666	64953333	26874
G	15	99640000	99660000	15	99740000	99760000	.	.	.	.	0,255,255	88	31.4917	24.5351	28.3055	30.3529	1.38921e-08	7.45397e-19	3.20437e-13	3.54416e-13	2	99640000	99750000	10000
G	15	77400000	77420000	15	77820000	77840000	.	.	.	.	0,255,255	87	26.1271	22.1697	24.9937	34.1061	9.00033e-13	2.43208e-18	8.11379e-13	3.36668e-08	3	77403333	77823333	14907
G	15	44180000	44200000	15	44500000	44520000	.	.	.	.	0,255,255	87	18.6339	18.3149	30.4943	19.8149	8.15277e-24	2.14557e-24	8.11379e-13	5.02146e-18	3	44170000	44523333	24037
G	15	68840000	68860000	15	68940000	68960000	.	.	.	.	0,255,255	86	46.6363	38.0573	44.5705	45.0082	0.000136216	4.42724e-08	0.000254854	0.000236755	4	68855000	68970000	20616
G	15	67040000	67060000	15	67140000	67160000	.	.	.	.	0,255,255	86	40.8391	38.1823	33.7799	41.7606	0.000136216	4.42724e-08	6.16081e-08	0.000236755	1	67050000	67150000	0
G	15	65920000	65940000	15	66140000	66160000	.	.	.	.	0,255,255	86	34.0978	26.9246	32.0736	31.7519	5.49521e-08	1.31348e-12	6.16081e-08	6.6643e-08	5	65926000	66138000	28284
G	15	68160000	68180000	15	68440000	68460000	.	.	.	.	0,255,255	85	28.059	22.5575	35.4262	23.2051	5.3216e-12	2.24048e-17	1.25977e-07	4.80093e-17	6	68160000	68453333	38006
G	15	65480000	65500000	15	65580000	65600000	.	.	.	.	0,255,255	85	44.151	31.9852	41.7756	34.4319	0.000222349	9.17834e-08	0.000413397	1.32769e-07	1	65490000	65590000	0
G	15	35000000	35020000	15	35200000	35220000	.	.	.	.	0,255,255	84	30.1681	32.0201	32.2004	42.3462	1.33111e-11	1.77849e-07	2.42947e-07	0.000611679	6	34970000	35210000	44721
G	15	101200000	101220000	15	101400000	101420000	.	.	.	.	0,255,255	83	26.5123	25.9548	34.8609	28.569	3.16502e-11	1.93816e-11	4.71975e-07	3.38587e-11	7	101187142	101418571	36589
G	15	93340000	93360000	15	93460000	93480000	.	.	.	.	0,255,255	83	32.7968	25.3351	36.1806	14.7025	4.21623e-07	1.93816e-11	4.71975e-07	1.49272e-27	2	93350000	93460000	10000
G	15	59820000	59840000	15	59920000	59940000	.	.	.	.	0,255,255	83	43.1896	25.3241	37.1033	26.8012	0.000529795	1.93816e-11	4.71975e-07	3.38587e-11	1	59830000	59930000	0
G	15	48800000	48820000	15	48900000	48920000	.	.	.	.	0,255,255	83	35.6873	36.933	34.8062	41.4938	4.21623e-07	3.49703e-07	4.71975e-07	0.000938999	2	48800000	48920000	14142
G	15	43000000	43020000	15	43200000	43220000	.	.	.	.	0,255,255	83	30.0321	27.0423	30.6026	33.8429	3.16502e-11	1.93816e-11	2.95303e-11	5.07845e-07	6	43003333	43223333	29814
G	15	78400000	78420000	15	78520000	78540000	.	.	.	.	0,255,255	82	43.4484	35.932	36.4862	47.852	0.000832754	6.60112e-07	9.01319e-07	0.00145581	3	78416666	78536666	14907
G	15	78240000	78260000	15	78380000	78400000	.	.	.	.	0,255,255	82	41.5175	33.5317	37.1504	41.6435	0.000832754	6.60112e-07	9.01319e-07	0.00145581	3	78256666	78396666	14907
G	15	50960000	50980000	15	51160000	51180000	.	.	.	.	0,255,255	82	22.9902	22.6451	21.4099	35.1546	1.22379e-15	6.60266e-16	1.36199e-15	9.45706e-07	5	50962000	51182000	34176
G	15	38280000	38300000	15	38680000	38700000	.	.	.	.	0,255,255	82	25.0484	16.5028	27.8848	19.1738	7.62342e-11	1.93943e-21	7.0427e-11	8.5063e-21	6	38296666	38670000	42164
G	15	51440000	51460000	15	51660000	51680000	.	.	.	.	0,255,255	80	27.8873	27.4376	29.8242	40.3033	4.1331e-10	2.63615e-10	3.93559e-10	0.00338363	3	51456666	51676666	14907
G	15	50440000	50460000	15	50600000	50620000	.	.	.	.	0,255,255	80	40.355	31.0756	34.977	40.7507	0.00193536	2.39752e-06	3.26017e-06	0.00338363	2	50440000	50610000	10000
G	15	73860000	73880000	15	73980000	74000000	.	.	.	.	0,255,255	78	31.6046	30.3265	37.9375	32.6438	8.97671e-06	1.40671e-09	1.08232e-05	1.12914e-05	2	73860000	73990000	10000
G	15	58040000	58060000	15	58140000	58160000	.	.	.	.	0,255,255	78	37.3035	31.1779	34.9184	35.3426	8.97671e-06	8.06024e-06	1.08232e-05	1.12914e-05	2	58040000	58150000	10000
G	15	34900000	34920000	15	35200000	35220000	.	.	.	.	0,255,255	78	21.2368	16.3459	17.4805	24.7289	8.48136e-14	3.58522e-19	1.35504e-18	2.29554e-09	1	34910000	35210000	0
G	15	31260000	31280000	15	31400000	31420000	.	.	.	.	0,255,255	78	39.5785	36.597	36.3891	44.0425	0.00428746	8.06024e-06	1.08232e-05	0.00749512	4	31285000	31415000	25495
G	15	34380000	34400000	15	34500000	34520000	.	.	.	.	0,255,255	77	41.0906	31.8477	30.1477	34.6181	0.00618751	1.42996e-05	4.72142e-09	1.96351e-05	3	34390000	34510000	20000
G	15	101540000	101560000	15	101800000	101820000	.	.	.	.	0,255,255	76	29.0556	19.0819	12.8191	32.4483	1.07891e-08	4.28433e-18	1.06937e-22	3.48203e-05	2	101560000	101810000	10000
G	15	80740000	80760000	15	81060000	81080000	.	.	.	.	0,255,255	76	23.0738	20.5018	26.4411	30.6565	6.3636e-13	3.91725e-13	1.05105e-08	1.18297e-08	3	80756666	81076666	14907
G	15	59440000	59460000	15	59780000	59800000	.	.	.	.	0,255,255	76	19.7551	17.5319	20.2275	26.3438	6.3636e-13	4.28433e-18	6.74831e-13	1.18297e-08	1	59450000	59790000	0
G	15	45780000	45800000	15	45900000	45920000	.	.	.	.	0,255,255	76	31.274	31.2408	31.3788	39.162	2.86164e-05	2.55369e-05	3.49341e-05	0.0156074	6	45753333	45903333	43843
G	15	33160000	33180000	15	33260000	33280000	.	.	.	.	0,255,255	75	37.6944	36.4706	37.8307	38.8904	5.06196e-05	4.58973e-05	6.19748e-05	0.0218637	2	33160000	33270000	10000
G	15	80860000	80880000	15	81060000	81080000	.	.	.	.	0,255,255	74	33.5603	31.1397	34.1489	38.4489	8.80744e-05	8.02951e-05	0.000109382	0.00010795	3	80870000	81070000	20000
G	15	70960000	70980000	15	71100000	71120000	.	.	.	.	0,255,255	73	34.709	34.2898	34.5516	34.4966	0.000149944	0.000137717	0.000186477	0.000186341	2	70980000	71110000	10000
G	15	55940000	55960000	15	56080000	56100000	.	.	.	.	0,255,255	73	34.2087	33.0694	41.5354	36.136	0.000149944	0.000137717	0.0440327	0.000186341	4	55950000	56095000	20616
G	15	98440000	98460000	15	98620000	98640000	.	.	.	.	0,255,255	71	24.8496	24.8629	30.8478	29.0892	4.83966e-07	3.34276e-07	4.79569e-07	5.28965e-07	2	98460000	98630000	10000
G	15	58040000	58060000	15	58360000	58380000	.	.	.	.	0,255,255	71	21.6546	22.8478	24.7149	29.7644	8.43544e-11	5.644e-11	4.79569e-07	5.28965e-07	2	58040000	58370000	10000
G	15	79320000	79340000	15	79460000	79480000	.	.	.	.	0,255,255	69	30.8681	29.515	34.4067	32.6964	1.99022e-06	1.40823e-06	0.00142684	0.00140825	2	79330000	79480000	10000
G	15	89900000	89920000	15	90000000	90020000	.	.	.	.	0,255,255	68	29.6258	27.3287	36.3281	28.0904	3.92347e-06	2.77938e-06	0.00227662	4.27063e-06	2	89900000	90000000	14142
G	15	69340000	69360000	15	69500000	69520000	.	.	.	.	0,255,255	68	33.0642	32.2296	36.9783	31.4583	0.00171434	0.00170961	0.00227662	0.0022226	1	69350000	69510000	0
G	15	39900000	39920000	15	40020000	40040000	.	.	.	.	0,255,255	67	28.595	26.2987	37.4609	30.6793	7.53889e-06	5.41443e-06	0.0035743	8.29098e-06	3	39910000	40036666	24037
G	15	32960000	32980000	15	33120000	33140000	.	.	.	.	0,255,255	67	28.3536	31.9512	35.8317	33.333	7.53889e-06	0.00268616	0.0035743	0.00349546	1	32970000	33130000	0
G	15	101440000	101460000	15	101540000	101560000	.	.	.	.	0,255,255	66	37.0688	28.945	36.5358	33.9137	0.00411205	1.06205e-05	0.00560357	0.00542433	1	101450000	101550000	0
G	15	73080000	73100000	15	73360000	73380000	.	.	.	.	0,255,255	66	23.5719	21.5721	25.7246	28.9523	7.77681e-09	5.61576e-09	1.50762e-05	1.61461e-05	2	73090000	73360000	10000
G	15	57420000	57440000	15	57600000	57620000	.	.	.	.	0,255,255	66	26.859	22.5223	27.4472	26.9407	1.47347e-05	5.61576e-09	1.50762e-05	1.61461e-05	2	57440000	57600000	14142
G	15	86260000	86280000	15	86360000	86380000	.	.	.	.	0,255,255	65	35.9295	22.6543	25.5878	29.641	0.00621962	1.32405e-08	2.90589e-05	3.06207e-05	1	86270000	86370000	0
G	15	56540000	56560000	15	56720000	56740000	.	.	.	.	0,255,255	65	24.8793	20.1838	20.8955	24.3187	2.79503e-05	1.32405e-08	1.92342e-08	2.0316e-08	2	56550000	56720000	10000
G	15	98440000	98460000	15	98700000	98720000	.	.	.	.	0,255,255	64	20.7633	18.0175	25.3898	17.7982	4.21573e-08	4.99846e-12	5.40182e-05	1.28353e-11	5	98434000	98722000	25298
G	15	79660000	79680000	15	80140000	80160000	.	.	.	.	0,255,255	64	16.5395	14.4786	18.4911	17.3773	9.17761e-12	3.24659e-16	1.31579e-11	1.28353e-11	9	79665555	80141111	45325
G	15	64040000	64060000	15	64360000	64380000	.	.	.	.	0,255,255	64	22.9703	20.5979	20.5355	34.8234	4.21573e-08	3.04283e-08	4.47354e-08	0.0125312	6	64013333	64370000	46308
G	15	39460000	39480000	15	39860000	39880000	.	.	.	.	0,255,255	64	19.1286	18.9654	23.486	26.1276	9.17761e-12	4.99846e-12	4.47354e-08	5.7447e-05	1	39470000	39870000	0
G	15	92400000	92420000	15	92600000	92620000	.	.	.	.	0,255,255	63	22.1394	22.2931	26.4278	25.147	9.58217e-08	7.08708e-08	9.95566e-05	0.000105485	2	92400000	92610000	10000
G	15	74340000	74360000	15	74600000	74620000	.	.	.	.	0,255,255	63	20.2	15.4317	12.879	28.56	9.58217e-08	1.16555e-15	4.96531e-15	0.000105485	1	74350000	74610000	0
G	15	71260000	71280000	15	71720000	71740000	.	.	.	.	0,255,255	63	18.527	15.9096	19.9693	22.5813	2.60403e-11	1.43702e-11	1.01913e-07	1.06197e-07	4	71270000	71735000	20616
G	15	68840000	68860000	15	69160000	69180000	.	.	.	.	0,255,255	63	15.2847	14.6602	17.4473	21.3138	3.97362e-15	1.16555e-15	3.51259e-11	1.06197e-07	2	68850000	69190000	20000
G	15	41180000	41200000	15	41460000	41480000	.	.	.	.	0,255,255	63	19.3913	18.3777	22.36	22.1258	2.60403e-11	1.43702e-11	1.01913e-07	1.06197e-07	1	41190000	41470000	0
G	15	31480000	31500000	15	31780000	31800000	.	.	.	.	0,255,255	63	18.2819	15.6965	19.7624	21.4352	2.60403e-11	1.43702e-11	1.01913e-07	1.06197e-07	5	31494000	31782000	25298
G	15	94720000	94740000	15	94860000	94880000	.	.	.	.	0,255,255	62	30.352	29.1802	34.507	35.3984	0.000171444	0.000131809	0.027468	0.0269583	6	94716666	94850000	33333
G	15	91200000	91220000	15	91420000	91440000	.	.	.	.	0,255,255	62	27.5161	21.9851	20.8313	30.456	0.000171444	1.63532e-07	2.35181e-07	0.000191484	2	91200000	91430000	10000
G	15	89200000	89220000	15	89340000	89360000	.	.	.	.	0,255,255	62	30.3946	30.0409	37.5611	34.5286	0.000171444	0.000131809	0.027468	0.0269583	3	89203333	89376666	27487
G	15	77480000	77500000	15	77800000	77820000	.	.	.	.	0,255,255	62	25.5967	25.7204	25.3014	38.5409	0.000171444	0.000131809	0.000181994	0.0269583	2	77480000	77820000	14142
G	15	99180000	99200000	15	99600000	99620000	.	.	.	.	0,255,255	61	19.7803	21.2824	23.1903	33.3426	4.82819e-07	3.62896e-07	5.36112e-07	0.0386557	2	99200000	99620000	14142
G	15	89020000	89040000	15	89140000	89160000	.	.	.	.	0,255,255	61	24.4778	22.2671	24.119	30.9191	4.82819e-07	3.62896e-07	5.36112e-07	0.0386557	2	89020000	89150000	10000
G	15	99820000	99840000	15	100240000	100260000	.	.	.	.	0,255,255	60	19.6486	14.4851	20.8736	18.7062	1.04208e-06	5.23514e-14	1.17483e-06	7.90699e-10	9	99814444	100263333	36784
G	15	99180000	99200000	15	99380000	99400000	.	.	.	.	0,255,255	60	28.521	26.1866	30.1682	27.1033	0.000530416	0.000422253	0.00056884	0.000602577	1	99190000	99390000	0
G	15	71880000	71900000	15	72020000	72040000	.	.	.	.	0,255,255	60	25.3923	28.1856	31.8734	28.4116	0.000530416	0.000422253	0.0554163	0.000602577	2	71880000	72020000	14142
G	15	59260000	59280000	15	59780000	59800000	.	.	.	.	0,255,255	60	13.8283	12.4906	17.7378	21.5499	1.64448e-13	5.23514e-14	7.35535e-10	1.16808e-06	5	59258000	59778000	30463
G	15	39000000	39020000	15	39460000	39480000	.	.	.	.	0,255,255	60	22.6149	18.92	30.6324	19.1177	1.04208e-06	3.2714e-10	0.00056884	7.90699e-10	2	39030000	39470000	20000
G	15	38740000	38760000	15	38960000	38980000	.	.	.	.	0,255,255	60	19.2971	15.1315	20.6948	21.8135	5.489e-10	5.23514e-14	1.17483e-06	1.16808e-06	2	38760000	38970000	10000
G	15	33520000	33540000	15	33980000	34000000	.	.	.	.	0,255,255	59	19.1839	15.2735	17.9412	20.8486	1.4912e-09	1.81436e-13	1.98392e-09	2.50733e-06	7	33561428	34004285	38440
G	15	26000000	26020000	15	26160000	26180000	.	.	.	.	0,255,255	59	29.1299	29.9603	38.4736	34.5798	0.00089721	0.000722236	0.0767069	0.0759507	2	25990000	26170000	20000
G	15	90440000	90460000	15	90620000	90640000	.	.	.	.	0,255,255	58	23.855	20.517	25.9266	23.4309	4.76563e-06	3.78235e-06	0.00167462	5.28791e-06	3	90443333	90616666	14908
G	15	67760000	67780000	15	68100000	68120000	.	.	.	.	0,255,255	58	17.3791	15.5157	15.8183	23.9036	3.85443e-09	6.18854e-13	5.26961e-09	5.28791e-06	5	67762000	68110000	28000
G	15	69340000	69360000	15	69680000	69700000	.	.	.	.	0,255,255	57	17.5273	14.9098	21.8663	16.8892	9.85539e-09	2.03845e-12	1.08947e-05	1.47676e-08	4	69345000	69695000	35355
G	15	63080000	63100000	15	63320000	63340000	.	.	.	.	0,255,255	57	23.4303	21.3306	26.7148	28.6124	9.96121e-06	7.84837e-06	0.00278029	0.00291556	3	63083333	63343333	14907
G	15	44180000	44200000	15	44360000	44380000	.	.	.	.	0,255,255	57	25.402	24.0354	28.1569	23.297	0.00242818	7.84837e-06	0.00278029	1.10332e-05	2	44180000	44370000	10000
G	15	99040000	99060000	15	99620000	99640000	.	.	.	.	0,255,255	56	15.2432	13.0294	17.1229	18.9815	1.88133e-11	6.47229e-12	3.38837e-08	3.79448e-08	4	99060000	99610000	22361
G	15	99920000	99940000	15	100200000	100220000	.	.	.	.	0,255,255	55	21.148	25.8616	24.6842	30.4698	4.13568e-05	0.00559379	0.00739121	0.0077231	2	99940000	100200000	14142
G	15	83920000	83940000	15	84220000	84240000	.	.	.	.	0,255,255	55	13.0003	12.4174	18.9559	16.4651	5.61577e-11	2.09115e-11	8.48411e-08	9.32317e-08	3	83916666	84236666	14907
G	15	76660000	76680000	15	76780000	76800000	.	.	.	.	0,255,255	55	25.702	24.5437	25.8416	24.1888	0.00626236	3.28787e-05	0.00739121	4.50358e-05	1	76670000	76790000	0
G	15	71740000	71760000	15	72000000	72020000	.	.	.	.	0,255,255	55	20.937	20.6744	25.6517	27.7467	4.13568e-05	3.28787e-05	0.00739121	0.0077231	2	71750000	72020000	10000
G	15	85820000	85840000	15	86060000	86080000	.	.	.	.	0,255,255	54	29.118	23.4691	29.0512	20.0883	0.00969876	6.58375e-05	0.0115529	8.85175e-05	2	85830000	86060000	10000
G	15	62720000	62740000	15	63020000	63040000	.	.	.	.	0,255,255	54	20.8954	22.1529	25.9593	28.5967	8.1495e-05	6.58375e-05	0.0115529	0.012299	3	62696666	63023333	33994
G	15	101160000	101180000	15	101540000	101560000	.	.	.	.	0,255,255	53	17.9866	11.8056	24.5768	9.19662	3.68728e-07	1.30117e-13	0.000172868	6.80162e-17	2	101170000	101540000	10000
G	15	49500000	49520000	15	50320000	50340000	.	.	.	.	0,255,255	53	22.6221	19.7998	27.3499	24.638	0.000153399	0.000128764	0.0180269	0.0190987	2	49520000	50320000	14142
G	15	46100000	46120000	15	46280000	46300000	.	.	.	.	0,255,255	53	19.9137	23.6698	30.404	23.5156	0.000153399	0.000128764	0.0180269	0.000171253	1	46110000	46290000	0
G	15	95800000	95820000	15	96860000	96880000	.	.	.	.	0,255,255	52	13.2597	12.4521	17.0657	18.1515	1.56314e-09	5.97038e-10	1.19294e-06	1.27687e-06	4	95810000	96880000	22361
G	15	94520000	94540000	15	94660000	94680000	.	.	.	.	0,255,255	52	27.8033	23.1637	22.6111	24.9108	0.0221429	0.000244104	0.000323203	0.028424	2	94540000	94670000	10000
G	15	66900000	66920000	15	67140000	67160000	.	.	.	.	0,255,255	52	21.6873	18.5108	23.5601	25.3843	0.00028488	6.06736e-07	0.000323203	0.028424	2	66900000	67150000	10000
G	15	42520000	42540000	15	42760000	42780000	.	.	.	.	0,255,255	52	25.0805	22.0578	27.6316	23.9109	0.0221429	0.000244104	0.027289	0.000323183	2	42510000	42770000	20000
G	15	39100000	39120000	15	39420000	39440000	.	.	.	.	0,255,255	52	21.5736	25.1433	28.3717	25.1502	0.00028488	0.020926	0.027289	0.028424	2	39110000	39420000	10000
G	15	60640000	60660000	15	60740000	60760000	.	.	.	.	0,255,255	51	22.9685	17.2112	24.4455	20.7842	0.000524585	1.42248e-06	0.000589075	0.000596162	1	60650000	60750000	0
G	15	47480000	47500000	15	48260000	48280000	.	.	.	.	0,255,255	51	13.314	13.6085	21.4663	15.2652	4.38989e-09	1.73056e-09	0.000589075	5.11283e-09	4	47505000	48280000	26926
G	15	45460000	45480000	15	45680000	45700000	.	.	.	.	0,255,255	51	24.5806	21.5605	22.5395	24.2476	0.000524585	0.000458087	0.000589075	0.000596162	1	45470000	45690000	0
G	15	99820000	99840000	15	100100000	100120000	.	.	.	.	0,255,255	50	15.7711	16.7707	23.2327	16.9176	4.52919e-06	3.25008e-06	0.00107508	6.46841e-06	1	99830000	100110000	0
G	15	98980000	99000000	15	99620000	99640000	.	.	.	.	0,255,255	50	12.9662	10.4742	12.6463	16.5697	1.17599e-08	6.22024e-12	1.58062e-08	6.46841e-06	1	98990000	99630000	0
G	15	78240000	78260000	15	78520000	78540000	.	.	.	.	0,255,255	50	13.2782	12.4846	22.2521	14.5579	1.17599e-08	4.98159e-09	0.00107508	1.48768e-08	2	78240000	78530000	10000
G	15	77960000	77980000	15	78080000	78100000	.	.	.	.	0,255,255	50	23.0719	25.9763	30.0321	27.5646	0.000950898	0.0462031	0.0594793	0.0619625	3	77956666	78110000	24037
G	15	68600000	68620000	15	68820000	68840000	.	.	.	.	0,255,255	50	23.3997	22.331	25.9563	26.4895	0.000950898	0.000843356	0.0594793	0.0619625	2	68590000	68830000	20000
G	15	95580000	95600000	15	95760000	95780000	.	.	.	.	0,255,255	47	20.1167	17.5646	20.2646	20.7096	0.00482765	3.51663e-05	0.00573833	0.00582285	2	95590000	95780000	10000
G	15	91580000	91600000	15	91800000	91820000	.	.	.	.	0,255,255	47	22.1175	16.1547	16.6158	19.9463	0.00482765	3.51663e-05	6.11853e-05	0.00582285	2	91600000	91810000	10000
G	15	76620000	76640000	15	77140000	77160000	.	.	.	.	0,255,255	47	12.8158	12.4316	12.9798	19.6099	2.24791e-07	1.04834e-07	2.92296e-07	0.00582285	2	76630000	77160000	10000
G	15	76520000	76540000	15	77140000	77160000	.	.	.	.	0,255,255	47	12.6717	10.9465	11.4738	17.7873	2.24791e-07	2.42186e-10	6.94172e-10	6.56083e-05	2	76510000	77150000	20000
G	15	73020000	73040000	15	73360000	73380000	.	.	.	.	0,255,255	47	18.7679	16.1976	12.1775	23.5662	4.73116e-05	3.51663e-05	6.94172e-10	0.00582285	1	73030000	73370000	0
G	15	56780000	56800000	15	57420000	57440000	.	.	.	.	0,255,255	47	11.3557	9.93426	17.1668	9.47112	5.67724e-10	2.42186e-10	6.11853e-05	6.46781e-13	1	56790000	57430000	0
G	15	37200000	37220000	15	37380000	37400000	.	.	.	.	0,255,255	47	20.7226	18.9814	19.8806	21.9756	0.00482765	3.51663e-05	0.00573833	0.00582285	2	37200000	37380000	14142
G	15	85500000	85520000	15	85700000	85720000	.	.	.	.	0,255,255	46	19.3087	15.7713	20.1101	17.8199	9.80026e-05	7.4784e-05	0.00961869	0.000136105	1	85510000	85710000	0
G	15	85120000	85140000	15	85460000	85480000	.	.	.	.	0,255,255	46	17.3293	13.9206	19.649	17.0716	9.80026e-05	2.78173e-07	0.00961869	0.000136105	3	85136666	85483333	14908
G	15	71740000	71760000	15	72080000	72100000	.	.	.	.	0,255,255	46	18.826	14.8278	19.21	15.8518	9.80026e-05	2.78173e-07	0.000127292	0.000136105	1	71750000	72090000	0
G	15	56780000	56800000	15	57140000	57160000	.	.	.	.	0,255,255	46	13.7261	12.3467	19.5267	13.5739	5.81933e-07	8.14754e-10	0.000127292	7.29688e-07	3	56790000	57130000	20000
G	15	83900000	83920000	15	84000000	84020000	.	.	.	.	0,255,255	45	20.4454	20.8293	23.48	20.3067	0.0127874	0.0125758	0.0157673	0.0160173	2	83910000	84030000	20000
G	15	74660000	74680000	15	74880000	74900000	.	.	.	.	0,255,255	45	20.5111	16.6438	23.3324	20.1197	0.0127874	0.000152855	0.0157673	0.0160173	2	74670000	74900000	10000
G	15	69760000	69780000	15	70760000	70780000	.	.	.	.	0,255,255	45	17.0579	11.2223	15.76	15.175	0.000197235	2.54159e-09	0.000252743	1.78501e-06	4	69780000	70770000	22361
G	15	55500000	55520000	15	55720000	55740000	.	.	.	.	0,255,255	45	17.7465	15.7715	19.9723	18.4443	0.000197235	0.000152855	0.0157673	0.000268835	1	55510000	55730000	0
G	15	52540000	52560000	15	53020000	53040000	.	.	.	.	0,255,255	45	17.8881	11.2891	15.7239	13.6636	0.000197235	2.54159e-09	0.000252743	1.78501e-06	3	52570000	53023333	21082
G	15	44160000	44180000	15	44780000	44800000	.	.	.	.	0,255,255	45	10.8537	8.8288	15.6524	12.0053	5.28339e-09	3.93588e-12	0.000252743	7.6973e-09	5	44166000	44798000	48166
G	15	60020000	60040000	15	60600000	60620000	.	.	.	.	0,255,255	44	19.39	12.9514	18.7541	13.4644	0.000390762	1.82292e-06	0.000497374	4.39815e-06	4	60005000	60610000	25000
G	15	93580000	93600000	15	94640000	94660000	.	.	.	.	0,255,255	42	10.7523	8.35482	13.5034	7.95322	1.31269e-07	2.19075e-10	2.47874e-05	6.00416e-10	3	93576666	94650000	21082
G	15	92640000	92660000	15	93240000	93260000	.	.	.	.	0,255,255	42	9.61179	8.53959	10.7002	12.357	5.07503e-10	2.19075e-10	1.86581e-07	1.91046e-07	4	92640000	93250000	22361
G	15	49900000	49920000	15	50160000	50180000	.	.	.	.	0,255,255	42	20.9858	23.415	24.4714	23.7242	0.0469911	0.0486576	0.0606561	0.0606015	2	49910000	50160000	10000
G	15	49160000	49180000	15	49440000	49460000	.	.	.	.	0,255,255	42	20.6413	18.6242	23.8634	22.9287	0.0469911	0.00118991	0.0606561	0.0606015	2	49160000	49440000	14142
G	15	57840000	57860000	15	58140000	58160000	.	.	.	.	0,255,255	41	15.7559	13.9025	15.8852	17.2357	0.00261485	2.57519e-05	0.00332372	0.00353111	1	57850000	58150000	0
G	15	46620000	46640000	15	46740000	46760000	.	.	.	.	0,255,255	41	15.4704	16.9528	17.0717	17.1224	4.37473e-05	0.00224138	0.00332372	0.00353111	1	46630000	46750000	0
G	15	100460000	100480000	15	101100000	101120000	.	.	.	.	0,255,255	40	10.5274	6.81897	7.92879	9.32872	9.87901e-07	1.02744e-11	8.68277e-09	7.95487e-09	1	100470000	101110000	0
G	15	60200000	60220000	15	60460000	60480000	.	.	.	.	0,255,255	40	13.322	16.7592	17.2101	18.2204	9.61479e-05	0.00408138	0.00600568	0.006275	1	60210000	60470000	0
G	15	60060000	60080000	15	60480000	60500000	.	.	.	.	0,255,255	40	11.9396	13.6513	15.4966	17.1808	9.87901e-07	5.92051e-05	0.000121738	0.006275	2	60050000	60490000	20000
G	15	49520000	49540000	15	50420000	50440000	.	.	.	.	0,255,255	39	17.0109	13.453	18.5803	13.0765	0.00811595	0.000132649	0.0106154	0.000269024	1	49530000	50430000	0
G	15	101860000	101880000	15	102100000	102120000	.	.	.	.	0,255,255	38	12.7032	11.9772	18.4967	11.6029	0.000420835	4.20506e-06	0.0181262	9.62899e-06	1	101870000	102110000	0
G	15	92640000	92660000	15	92920000	92940000	.	.	.	.	0,255,255	38	13.4231	14.1875	17.2717	14.4734	0.000420835	0.000288967	0.0181262	0.000568928	1	92650000	92930000	0
G	15	81260000	81280000	15	81540000	81560000	.	.	.	.	0,255,255	38	14.9619	12.0449	14.9423	18.2761	0.000420835	4.20506e-06	0.000546816	0.0186876	1	81270000	81550000	0
G	15	69820000	69840000	15	70760000	70780000	.	.	.	.	0,255,255	37	13.0249	10.274	12.3508	13.8361	0.000850596	1.08263e-05	2.27931e-05	0.0011733	1	69830000	70770000	0
G	15	59980000	60000000	15	60480000	60500000	.	.	.	.	0,255,255	37	11.7529	10.8131	15.1396	12.8671	1.7205e-05	1.08263e-05	0.00111313	0.0011733	1	59990000	60490000	0
G	15	34360000	34380000	15	34640000	34660000	.	.	.	.	0,255,255	37	16.5781	15.2493	19.5395	19.0218	0.0226171	0.000612534	0.03019	0.0309278	2	34380000	34660000	14142
G	15	70040000	70060000	15	70760000	70780000	.	.	.	.	0,255,255	36	14.8207	14.7717	13.5801	18.3537	0.00167733	0.00125565	0.00221696	0.049841	2	70030000	70770000	20000
G	15	66200000	66220000	15	66560000	66580000	.	.	.	.	0,255,255	36	13.712	9.73814	11.5834	12.0249	0.00167733	3.30057e-07	5.38428e-05	5.85598e-05	1	66210000	66570000	0
G	15	30040000	30060000	15	30340000	30360000	.	.	.	.	0,255,255	36	13.129	14.3294	14.0643	19.3488	0.00167733	0.00125565	0.00221696	0.049841	2	30050000	30340000	10000
G	15	43680000	43700000	15	44040000	44060000	.	.	.	.	0,255,255	35	15.36	10.8016	12.9316	13.0441	0.00320255	6.73644e-05	0.00428755	0.00441072	1	43690000	44050000	0
G	15	60860000	60880000	15	62120000	62140000	.	.	.	.	0,255,255	34	7.97243	6.40322	7.18442	10.1001	4.92004e-06	3.78865e-08	7.87644e-08	0.000313899	1	60870000	62130000	0
G	15	91840000	91860000	15	92620000	92640000	.	.	.	.	0,255,255	33	9.40667	10.0591	12.5339	11.5091	1.33619e-05	0.000365593	0.0142996	0.000681913	4	91850000	92625000	20616
G	15	91500000	91520000	15	91800000	91820000	.	.	.	.	0,255,255	33	12.3801	8.49781	4.45113	14.172	0.000488567	8.7976e-06	4.93137e-12	0.0149253	1	91510000	91810000	0
G	15	86400000	86420000	15	88780000	88800000	.	.	.	.	0,255,255	33	8.24033	7.42403	10.3469	5.74979	1.33619e-05	1.29393e-07	0.000641389	2.11529e-09	2	86410000	88810000	20000
G	15	47480000	47500000	15	48540000	48560000	.	.	.	.	0,255,255	33	7.96766	6.44926	8.81192	9.21664	1.33619e-05	1.29393e-07	1.8901e-05	1.99885e-05	2	47490000	48560000	10000
G	15	95560000	95580000	15	96860000	96880000	.	.	.	.	0,255,255	32	9.3596	8.81632	11.6786	10.273	3.65068e-05	2.48889e-05	0.00137869	0.00145027	1	95570000	96870000	0
G	15	38980000	39000000	15	39860000	39880000	.	.	.	.	0,255,255	31	13.7602	9.19545	10.0867	9.59053	0.0310843	6.68908e-05	0.00285147	0.000139757	3	39010000	39863333	24037
G	15	37460000	37480000	15	38120000	38140000	.	.	.	.	0,255,255	31	11.8352	9.63114	9.785	12.4639	0.00214366	6.68908e-05	0.000127624	0.0444217	2	37470000	38120000	10000
G	15	101160000	101180000	15	101780000	101800000	.	.	.	.	0,255,255	29	6.39205	5.02681	7.10007	6.23199	2.07803e-05	3.5851e-07	2.7827e-05	6.17504e-07	3	101170000	101796666	24037
G	15	95560000	95580000	15	97780000	97800000	.	.	.	.	0,255,255	29	7.30494	9.69063	9.56889	11.2985	2.07803e-05	0.000414028	0.000719798	0.0116507	1	95570000	97790000	0
G	15	38280000	38300000	15	38960000	38980000	.	.	.	.	0,255,255	29	5.46513	3.67237	6.41779	4.68397	4.82934e-07	3.11783e-11	2.7827e-05	6.19573e-09	1	38290000	38970000	0
G	15	86380000	86400000	15	88980000	89000000	.	.	.	.	0,255,255	27	10.6605	6.19452	8.31836	6.35836	0.0260795	4.73567e-06	0.00356938	0.000217417	2	86400000	88990000	10000
G	15	67220000	67240000	15	68120000	68140000	.	.	.	.	0,255,255	27	6.17161	5.30273	7.47278	8.29058	6.40377e-06	4.73567e-06	0.000223215	0.00380603	1	67230000	68130000	0
G	15	67800000	67820000	15	68440000	68460000	.	.	.	.	0,255,255	26	5.48196	6.26127	6.88711	8.38899	2.09208e-05	0.000346284	0.000582106	0.00791229	1	67810000	68450000	0
G	15	25740000	25760000	15	27100000	27120000	.	.	.	.	0,255,255	26	6.82852	5.25892	7.5588	6.33326	0.000419913	1.67028e-05	0.000582106	0.000579433	1	25750000	27110000	0
G	15	95520000	95540000	15	97760000	97780000	.	.	.	.	0,255,255	25	5.16885	6.76426	8.25534	7.26439	6.17391e-05	0.000907121	0.0150571	0.00146635	1	95530000	97770000	0
G	15	46600000	46620000	15	47420000	47440000	.	.	.	.	0,255,255	25	6.99744	6.87071	7.32326	8.86392	0.00104481	0.000907121	0.00148692	0.0156209	1	46610000	47430000	0
G	15	95800000	95820000	15	97760000	97780000	.	.	.	.	0,255,255	22	4.22523	4.75229	3.18351	7.12771	8.69802e-05	0.000102725	6.1454e-06	0.0161887	1	95810000	97770000	0
G	15	78240000	78260000	15	79020000	79040000	.	.	.	.	0,255,255	18	1.6941	1.94001	2.55691	2.57161	1.28133e-07	4.07366e-07	0.000154138	0.000124842	3	78256666	79043333	14908
G	15	75620000	75640000	15	78220000	78240000	.	.	.	.	0,255,255	16	0.64961	0.801121	0.720092	0.586993	5.21909e-07	3.77163e-06	3.2089e-06	4.43582e-06	1	75630000	78230000	0
G	15	78260000	78280000	15	79060000	79080000	.	.	.	.	0,255,255	15	1.99601	2.0298	2.97909	2.48168	0.000451173	0.000934802	0.0080735	0.000924583	1	78270000	79070000	0
G	15	74400000	74420000	15	75560000	75580000	.	.	.	.	0,255,255	15	0.458344	0.550165	0.454005	2.42252	5.78928e-06	3.85072e-05	3.26231e-05	0.000924583	1	74410000	75570000	0
G	16	69820000	69840000	16	69960000	69980000	.	.	.	.	0,255,255	140	44.9624	39.5753	48.3008	42.1427	1.46395e-21	1.09813e-21	2.32319e-21	2.00755e-21	5	69846000	69962000	25298
G	16	22000000	22020000	16	22100000	22120000	.	.	.	.	0,255,255	130	54.8628	52.9395	56.2537	54.9606	2.50949e-11	1.33863e-10	7.003e-11	1.17704e-10	2	22000000	22100000	14142
G	16	85840000	85860000	16	86040000	86060000	.	.	.	.	0,255,255	118	46.3435	33.4345	36.0747	38.2431	2.77555e-13	7.2659e-20	8.56994e-20	1.6487e-19	5	85858000	86030000	23324
G	16	69180000	69200000	16	69300000	69320000	.	.	.	.	0,255,255	115	49.1803	40.7562	49.1111	52.003	1.83636e-07	2.46899e-12	6.14948e-07	6.36053e-07	4	69200000	69320000	14142
G	16	84540000	84560000	16	84640000	84660000	.	.	.	.	0,255,255	109	46.8584	30.519	39.2693	36.0191	1.93209e-10	5.01568e-23	3.21211e-10	6.60658e-16	1	84550000	84650000	0
G	16	12040000	12060000	16	12140000	12160000	.	.	.	.	0,255,255	106	46.1004	37.9566	36.8099	52.6964	1.58807e-09	5.51904e-15	7.58641e-15	5.44609e-05	1	12050000	12150000	0
G	16	68120000	68140000	16	68220000	68240000	.	.	.	.	0,255,255	98	40.2619	33.8313	36.495	47.2056	2.50038e-07	4.93788e-12	6.51037e-12	4.5895e-07	1	68130000	68230000	0
G	16	87800000	87820000	16	87900000	87920000	.	.	.	.	0,255,255	95	38.1531	29.3862	29.9263	33.8338	6.73088e-11	1.99805e-16	3.50163e-16	7.94804e-11	2	87810000	87920000	10000
G	16	75300000	75320000	16	75400000	75420000	.	.	.	.	0,255,255	95	42.5257	47.1332	40.5274	53.9712	1.42994e-06	2.0306e-06	2.57362e-06	0.00550579	4	75285000	75415000	25495
G	16	68940000	68960000	16	69140000	69160000	.	.	.	.	0,255,255	95	38.9956	32.5881	32.7735	43.9998	1.42994e-06	5.48368e-11	7.61779e-11	2.4455e-06	4	68945000	69145000	25495
G	16	11620000	11640000	16	11740000	11760000	.	.	.	.	0,255,255	94	40.5673	43.1793	46.2764	50.2649	2.49029e-06	3.54306e-06	4.56165e-06	0.00769371	1	11630000	11750000	0
G	16	68400000	68420000	16	68540000	68560000	.	.	.	.	0,255,255	93	41.5483	32.1393	33.7864	41.2517	4.35991e-06	2.6554e-10	3.60882e-10	7.42203e-06	1	68410000	68550000	0
G	16	23800000	23820000	16	24020000	24040000	.	.	.	.	0,255,255	93	25.4367	23.8647	28.255	34.45	2.84131e-15	1.79613e-21	2.52175e-15	3.84997e-10	9	23792222	24030000	46719
G	16	10600000	10620000	16	10820000	10840000	.	.	.	.	0,255,255	90	26.6346	24.3152	27.3972	29.9934	5.43519e-14	7.14192e-20	4.92766e-14	5.32164e-14	3	10616666	10823333	14908
G	16	53080000	53100000	16	53180000	53200000	.	.	.	.	0,255,255	89	38.8712	39.0844	48.261	39.3227	3.30882e-05	5.16057e-05	6.2416e-05	5.89229e-05	3	53090000	53216666	33334
G	16	75020000	75040000	16	75120000	75140000	.	.	.	.	0,255,255	88	37.1944	36.3081	37.6725	44.2357	1.38921e-08	1.11855e-08	1.56352e-08	9.58501e-05	4	75025000	75150000	20616
G	16	56620000	56640000	16	56720000	56740000	.	.	.	.	0,255,255	87	43.0317	40.8029	39.5439	45.7809	8.65078e-05	0.000131708	0.000162833	0.000152161	1	56630000	56730000	0
G	16	11060000	11080000	16	11340000	11360000	.	.	.	.	0,255,255	87	24.6391	19.3586	35.1956	20.9371	9.00033e-13	2.14557e-24	3.11128e-08	5.02146e-18	3	11063333	11343333	14907
G	16	77260000	77280000	16	77620000	77640000	.	.	.	.	0,255,255	86	20.6075	16.0973	25.384	21.4733	1.49629e-17	8.62745e-24	2.03403e-12	1.62829e-17	6	77270000	77623333	33333
G	16	70700000	70720000	16	70800000	70820000	.	.	.	.	0,255,255	86	41.8245	24.1169	31.2914	30.1364	0.000136216	7.65188e-18	6.16081e-08	2.33194e-12	1	70710000	70810000	0
G	16	70560000	70580000	16	70680000	70700000	.	.	.	.	0,255,255	86	41.6906	32.1168	27.2454	37.2672	0.000136216	4.42724e-08	2.03403e-12	6.6643e-08	3	70570000	70690000	20000
G	16	66980000	67000000	16	67200000	67220000	.	.	.	.	0,255,255	85	30.7601	22.7954	25.3738	23.3009	5.3216e-12	2.24048e-17	4.86217e-12	4.80093e-17	2	66990000	67200000	10000
G	16	86100000	86120000	16	86540000	86560000	.	.	.	.	0,255,255	84	15.2533	11.1926	13.6549	21.6245	8.93031e-28	8.09557e-35	1.27532e-27	1.44585e-16	7	86095714	86552857	34405
G	16	30440000	30460000	16	30600000	30620000	.	.	.	.	0,255,255	84	32.7754	30.7112	42.5175	32.7506	2.14398e-07	7.96484e-12	0.00063773	2.58485e-07	5	30446000	30630000	25612
G	16	21560000	21580000	16	22680000	22700000	.	.	.	.	0,255,255	84	16.5035	13.4304	23.3739	18.3034	3.89292e-22	1.41149e-28	1.62172e-16	6.81422e-22	9	21583333	22667777	78062
G	16	14380000	14400000	16	14620000	14640000	.	.	.	.	0,255,255	84	30.1359	27.5987	34.0564	33.2524	1.33111e-11	7.96484e-12	2.42947e-07	2.58485e-07	7	14367142	14635714	38332
G	16	57340000	57360000	16	57440000	57460000	.	.	.	.	0,255,255	83	45.2321	35.2521	38.039	41.3161	0.000529795	3.49703e-07	4.71975e-07	0.000938999	2	57340000	57450000	10000
G	16	2060000	2080000	16	2180000	2200000	.	.	.	.	0,255,255	82	40.9557	32.6974	32.5733	25.9777	0.000832754	6.60112e-07	9.01319e-07	8.24167e-11	1	2070000	2190000	0
G	16	75240000	75260000	16	75420000	75440000	.	.	.	.	0,255,255	81	31.9408	25.7941	30.6943	36.1801	1.49025e-06	1.10895e-10	1.69838e-10	1.78301e-06	3	75243333	75436666	14908
G	16	21580000	21600000	16	21720000	21740000	.	.	.	.	0,255,255	81	40.8062	35.3951	40.9317	41.4909	0.00127171	1.26122e-06	0.00237239	0.0022373	1	21590000	21730000	0
G	16	24560000	24580000	16	24780000	24800000	.	.	.	.	0,255,255	80	29.9122	21.3362	30.9157	20.239	4.1331e-10	5.77069e-15	3.26017e-06	1.13478e-14	5	24574000	24802000	32249
G	16	89400000	89420000	16	89540000	89560000	.	.	.	.	0,255,255	79	35.6423	38.4005	42.8179	42.0669	5.05759e-06	4.39614e-06	0.00535045	0.00503334	3	89410000	89556666	24037
G	16	24580000	24600000	16	24700000	24720000	.	.	.	.	0,255,255	79	37.1822	37.0119	48.7584	34.9886	5.05759e-06	4.39614e-06	0.00535045	6.24902e-06	1	24590000	24710000	0
G	16	81420000	81440000	16	81740000	81760000	.	.	.	.	0,255,255	77	22.1002	16.8603	23.3946	23.0311	2.3395e-13	1.24479e-18	2.45276e-13	2.65339e-13	11	81424545	81746363	45600
G	16	70400000	70420000	16	70500000	70520000	.	.	.	.	0,255,255	77	35.3103	30.5691	37.3957	32.6781	1.59843e-05	3.20132e-09	1.96817e-05	1.96351e-05	2	70400000	70520000	14142
G	16	57780000	57800000	16	57900000	57920000	.	.	.	.	0,255,255	76	36.7349	31.6867	31.4873	31.2164	2.86164e-05	2.55369e-05	3.49341e-05	3.48203e-05	2	57790000	57920000	10000
G	16	15960000	15980000	16	16140000	16160000	.	.	.	.	0,255,255	76	36.7572	39.8582	46.3873	39.6489	2.86164e-05	0.0143051	0.0162521	0.0156074	3	15963333	16150000	24037
G	16	50100000	50120000	16	50240000	50260000	.	.	.	.	0,255,255	75	26.4456	25.8588	32.1623	29.3923	2.33694e-08	1.59865e-08	6.19748e-05	2.62619e-08	1	50110000	50250000	0
G	16	57100000	57120000	16	57200000	57220000	.	.	.	.	0,255,255	74	35.9407	28.6888	34.0763	31.4665	8.80744e-05	3.52038e-08	0.000109382	0.00010795	1	57110000	57210000	0
G	16	27240000	27260000	16	27340000	27360000	.	.	.	.	0,255,255	74	32.394	37.4687	38.9456	39.1184	8.80744e-05	8.02951e-05	0.0323255	0.03101	3	27243333	27363333	14907
G	16	23180000	23200000	16	23440000	23460000	.	.	.	.	0,255,255	72	21.4004	17.4289	20.7406	19.6499	3.31543e-11	5.79882e-16	3.55031e-11	3.81044e-11	3	23176666	23436666	27487
G	16	71440000	71460000	16	71540000	71560000	.	.	.	.	0,255,255	69	24.3431	25.3398	28.7743	21.8821	5.38377e-10	1.40823e-06	1.99939e-06	5.85511e-10	3	71443333	71550000	24037
G	16	19600000	19620000	16	19880000	19900000	.	.	.	.	0,255,255	69	18.4282	15.1273	16.6587	24.0821	3.75382e-14	4.55566e-19	5.88598e-14	5.85511e-10	4	19625000	19905000	25495
G	16	72260000	72280000	16	72500000	72520000	.	.	.	.	0,255,255	68	28.0238	23.7582	26.1876	26.267	3.92347e-06	9.12319e-10	3.97022e-06	4.27063e-06	5	72266000	72502000	32249
G	16	58380000	58400000	16	58500000	58520000	.	.	.	.	0,255,255	68	33.4446	26.531	26.6853	32.3843	0.00171434	2.77938e-06	3.97022e-06	0.0022226	4	58380000	58520000	14142
G	16	57600000	57620000	16	57740000	57760000	.	.	.	.	0,255,255	67	27.0477	23.164	34.8103	24.7202	7.53889e-06	2.24195e-09	0.0035743	8.29098e-06	3	57603333	57730000	21082
G	16	58040000	58060000	16	58140000	58160000	.	.	.	.	0,255,255	66	36.3316	27.8944	29.7346	33.5832	0.00411205	1.06205e-05	1.50762e-05	0.00542433	1	58050000	58150000	0
G	16	86580000	86600000	16	87080000	87100000	.	.	.	.	0,255,255	65	21.7235	17.7595	30.0541	20.0356	1.87314e-08	1.69685e-12	2.90589e-05	2.0316e-08	4	86595000	87085000	35355
G	16	72880000	72900000	16	72980000	73000000	.	.	.	.	0,255,255	65	26.9183	32.421	33.6729	29.2669	2.79503e-05	0.00636787	0.00852735	3.06207e-05	1	72890000	72990000	0
G	16	77700000	77720000	16	78000000	78020000	.	.	.	.	0,255,255	64	15.5882	14.5995	19.0738	17.1523	9.17761e-12	3.24659e-16	1.31579e-11	1.28353e-11	6	77706666	78013333	23571
G	16	50260000	50280000	16	50360000	50380000	.	.	.	.	0,255,255	63	34.6491	24.6798	29.3862	30.6825	0.0137402	7.2824e-05	9.95566e-05	0.000105485	3	50256666	50370000	21082
G	16	19080000	19100000	16	19380000	19400000	.	.	.	.	0,255,255	63	17.6294	18.301	20.9065	23.0302	2.60403e-11	1.43702e-11	1.01913e-07	1.06197e-07	1	19090000	19390000	0
G	16	89800000	89820000	16	89920000	89940000	.	.	.	.	0,255,255	62	29.3809	29.5274	35.9574	32.5349	0.000171444	0.000131809	0.027468	0.0269583	2	89800000	89930000	10000
G	16	51840000	51860000	16	52000000	52020000	.	.	.	.	0,255,255	62	21.7931	20.4432	21.3444	24.4399	2.14684e-07	1.63532e-07	2.35181e-07	2.41778e-07	5	51862000	52006000	32249
G	16	31200000	31220000	16	31460000	31480000	.	.	.	.	0,255,255	62	20.7748	16.2984	17.3566	15.7067	2.14684e-07	4.12586e-11	9.80444e-11	1.05134e-10	6	31203333	31460000	40139
G	16	19900000	19920000	16	20380000	20400000	.	.	.	.	0,255,255	62	17.0044	13.4044	14.3372	15.1015	7.44596e-11	4.27529e-15	1.7799e-14	1.6273e-14	5	19926000	20390000	25612
G	16	55960000	55980000	16	56340000	56360000	.	.	.	.	0,255,255	61	16.1238	12.6118	14.7992	20.7345	2.06693e-10	1.56449e-14	6.44782e-14	5.40841e-07	3	55990000	56350000	20000
G	16	30980000	31000000	16	31080000	31100000	.	.	.	.	0,255,255	61	26.6551	21.8065	26.0212	24.5765	0.000303676	3.62896e-07	0.000323304	5.40841e-07	2	30980000	31100000	14142
G	16	29120000	29140000	16	29260000	29280000	.	.	.	.	0,255,255	61	25.127	22.5505	28.6159	20.2905	0.000303676	3.62896e-07	0.000323304	5.40841e-07	2	29120000	29270000	10000
G	16	21160000	21180000	16	21300000	21320000	.	.	.	.	0,255,255	61	27.1265	25.1192	21.1213	28.4259	0.000303676	0.000238195	5.36112e-07	0.000343992	1	21170000	21310000	0
G	16	74740000	74760000	16	74860000	74880000	.	.	.	.	0,255,255	60	30.6621	27.3525	32.7425	30.9968	0.000530416	0.000422253	0.0554163	0.0551174	2	74750000	74880000	10000
G	16	48720000	48740000	16	49360000	49380000	.	.	.	.	0,255,255	60	17.9685	13.0442	20.4036	16.4237	5.489e-10	5.23514e-14	1.17483e-06	7.90699e-10	6	48733333	49383333	45339
G	16	19700000	19720000	16	19880000	19900000	.	.	.	.	0,255,255	60	28.0932	26.667	21.5983	38.542	0.000530416	0.000422253	1.17483e-06	0.0551174	2	19690000	19890000	20000
G	16	860000	880000	16	1100000	1120000	.	.	.	.	0,255,255	60	23.1463	21.1196	25.0155	24.7931	1.04208e-06	8.05338e-07	0.00056884	0.000602577	1	870000	1110000	0
G	16	86580000	86600000	16	87300000	87320000	.	.	.	.	0,255,255	59	11.3194	8.38094	15.3625	10.0726	9.56964e-17	2.42707e-21	7.4857e-13	1.23468e-16	4	86595000	87310000	20616
G	16	84780000	84800000	16	84940000	84960000	.	.	.	.	0,255,255	59	28.6542	26.5243	37.9105	26.8392	0.00089721	0.000722236	0.0767069	0.00103786	4	84790000	84980000	30000
G	16	15900000	15920000	16	16220000	16240000	.	.	.	.	0,255,255	59	32.9315	26.3289	23.0743	36.2454	0.0552656	0.000722236	2.48327e-06	0.0759507	2	15900000	16240000	14142
G	16	75680000	75700000	16	75780000	75800000	.	.	.	.	0,255,255	57	21.6688	19.2594	17.4389	23.857	9.96121e-06	6.28171e-09	1.36405e-08	1.10332e-05	1	75690000	75790000	0
G	16	69400000	69420000	16	69680000	69700000	.	.	.	.	0,255,255	57	28.2795	21.4059	28.4271	20.1404	0.00242818	7.84837e-06	0.00278029	1.10332e-05	2	69400000	69680000	14142
G	16	48380000	48400000	16	48640000	48660000	.	.	.	.	0,255,255	57	20.77	17.4465	22.9358	22.8315	9.96121e-06	6.28171e-09	1.08947e-05	1.10332e-05	4	48385000	48635000	25495
G	16	10120000	10140000	16	10260000	10280000	.	.	.	.	0,255,255	57	28.5245	26.2834	25.9209	30.0891	0.00242818	0.00207994	0.00278029	0.00291556	2	10120000	10270000	10000
G	16	14020000	14040000	16	14320000	14340000	.	.	.	.	0,255,255	55	22.0686	17.1466	27.3326	21.6121	4.13568e-05	4.18345e-08	0.00739121	4.50358e-05	5	14026000	14354000	28844
G	16	11480000	11500000	16	11740000	11760000	.	.	.	.	0,255,255	55	18.1694	19.7354	27.1821	25.2838	6.17834e-08	3.28787e-05	0.00739121	0.0077231	2	11500000	11750000	10000
G	16	2380000	2400000	16	2540000	2560000	.	.	.	.	0,255,255	55	21.356	22.686	24.4674	27.7955	4.13568e-05	3.28787e-05	4.51669e-05	0.0077231	1	2390000	2550000	0
G	16	87420000	87440000	16	87660000	87680000	.	.	.	.	0,255,255	54	24.8367	20.1588	25.4199	21.0574	0.00969876	6.58375e-05	0.0115529	8.85175e-05	2	87440000	87670000	10000
G	16	81960000	81980000	16	82260000	82280000	.	.	.	.	0,255,255	53	18.6464	17.3053	18.394	26.4421	3.68728e-07	2.53183e-07	4.97819e-07	0.0190987	4	81955000	82265000	38079
G	16	71020000	71040000	16	71340000	71360000	.	.	.	.	0,255,255	53	18.7241	21.1705	23.9234	26.7246	3.68728e-07	0.000128764	0.000172868	0.0190987	2	71030000	71360000	10000
G	16	15840000	15860000	16	16220000	16240000	.	.	.	.	0,255,255	52	23.6014	18.2701	16.8223	26.6133	0.00028488	6.06736e-07	1.19294e-06	0.028424	3	15836666	16243333	29815
G	16	85440000	85460000	16	85640000	85660000	.	.	.	.	0,255,255	51	20.9327	19.8432	22.1636	23.894	0.000524585	0.000458087	0.000589075	0.000596162	1	85450000	85650000	0
G	16	84540000	84560000	16	84740000	84760000	.	.	.	.	0,255,255	50	21.9874	17.123	30.2699	19.4554	0.000950898	3.25008e-06	0.0594793	6.46841e-06	2	84550000	84760000	10000
G	16	67280000	67300000	16	67480000	67500000	.	.	.	.	0,255,255	50	27.7549	21.8136	26.5858	23.3878	0.0472861	0.000843356	0.0594793	0.00108281	2	67270000	67490000	20000
G	16	66420000	66440000	16	66620000	66640000	.	.	.	.	0,255,255	50	26.8434	20.1978	27.5231	22.6636	0.0472861	0.000843356	0.0594793	0.00108281	2	66440000	66620000	14142
G	16	24060000	24080000	16	24500000	24520000	.	.	.	.	0,255,255	50	15.0099	10.2217	11.525	16.0838	1.17599e-08	6.22024e-12	1.80578e-11	6.46841e-06	3	24050000	24510000	20000
G	16	70360000	70380000	16	70660000	70680000	.	.	.	.	0,255,255	49	19.1302	15.62	21.3659	16.6256	1.01876e-05	7.45621e-06	0.00192536	1.4518e-05	1	70370000	70670000	0
G	16	20860000	20880000	16	21100000	21120000	.	.	.	.	0,255,255	49	21.2905	22.9246	27.6976	26.4844	0.0016728	0.00151719	0.0853215	0.0879148	2	20860000	21110000	10000
G	16	31520000	31540000	16	31700000	31720000	.	.	.	.	0,255,255	48	20.3984	18.3183	19.784	18.8923	0.00288262	1.62498e-05	0.00334899	3.09954e-05	2	31510000	31710000	20000
G	16	50400000	50420000	16	50660000	50680000	.	.	.	.	0,255,255	47	18.2056	17.636	21.8423	20.0377	4.73116e-05	3.51663e-05	0.00573833	0.00582285	1	50410000	50670000	0
G	16	10340000	10360000	16	10600000	10620000	.	.	.	.	0,255,255	46	18.076	15.3457	17.5893	15.176	9.80026e-05	2.78173e-07	0.000127292	7.29688e-07	1	10350000	10610000	0
G	16	47160000	47180000	16	48180000	48200000	.	.	.	.	0,255,255	45	13.4349	14.4427	16.9973	19.8613	1.46906e-06	7.21584e-07	0.000252743	0.0160173	2	47170000	48180000	10000
G	16	57780000	57800000	16	58020000	58040000	.	.	.	.	0,255,255	44	13.0655	12.1446	16.6748	15.2622	3.55615e-06	7.81674e-09	0.000497374	4.39815e-06	2	57800000	58030000	10000
G	16	80060000	80080000	16	80400000	80420000	.	.	.	.	0,255,255	43	14.5344	14.0774	13.84	17.781	8.36954e-06	4.47835e-06	1.02928e-05	0.00101937	1	80070000	80410000	0
G	16	19100000	19120000	16	19500000	19520000	.	.	.	.	0,255,255	43	15.9391	13.0617	15.0684	15.1323	0.000750272	4.47835e-06	1.02928e-05	1.06447e-05	2	19100000	19510000	10000
G	16	11040000	11060000	16	11440000	11460000	.	.	.	.	0,255,255	42	18.7446	11.6091	20.4569	11.6418	0.00142013	7.03452e-08	0.0606561	1.91046e-07	2	11050000	11470000	20000
G	16	75820000	75840000	16	77200000	77220000	.	.	.	.	0,255,255	41	9.77531	6.74994	7.62588	9.70748	1.84416e-09	2.37317e-12	4.79795e-12	2.20968e-09	5	75826000	77194000	33941
G	16	50060000	50080000	16	50380000	50400000	.	.	.	.	0,255,255	41	16.9971	13.5223	18.6102	15.5024	0.00261485	2.57519e-05	0.00332372	5.7195e-05	2	50060000	50400000	14142
G	16	9240000	9260000	16	10260000	10280000	.	.	.	.	0,255,255	41	10.0887	9.9328	12.3818	12.3404	3.67119e-07	2.02978e-07	5.54908e-05	5.27622e-07	3	9236666	10256666	27487
G	16	27160000	27180000	16	27460000	27480000	.	.	.	.	0,255,255	40	19.4833	13.338	15.5429	14.9005	0.00462721	5.92051e-05	0.000121738	0.000124889	1	27170000	27470000	0
G	16	19900000	19920000	16	20300000	20320000	.	.	.	.	0,255,255	39	12.9416	12.3328	14.0137	14.8434	0.000204354	1.56981e-06	0.000261891	0.000269024	2	19920000	20310000	10000
G	16	12540000	12560000	16	12900000	12920000	.	.	.	.	0,255,255	39	12.0081	12.9269	14.5612	18.8088	2.67194e-06	0.000132649	0.000261891	0.0109841	1	12550000	12910000	0
G	16	81060000	81080000	16	81360000	81380000	.	.	.	.	0,255,255	38	14.6019	12.14	15.6852	14.8923	0.000420835	4.20506e-06	0.0181262	0.000568928	1	81070000	81370000	0
G	16	68560000	68580000	16	69140000	69160000	.	.	.	.	0,255,255	38	8.67386	8.01733	9.32901	11.4816	6.44935e-08	3.29852e-08	9.21594e-08	9.62899e-06	1	68570000	69150000	0
G	16	64080000	64100000	16	64480000	64500000	.	.	.	.	0,255,255	38	15.1934	15.5399	15.4028	16.4091	0.000420835	0.000288967	0.000546816	0.0186876	1	64090000	64490000	0
G	16	23800000	23820000	16	24500000	24520000	.	.	.	.	0,255,255	38	8.82704	7.42054	7.7279	13.2642	6.44935e-08	1.71301e-10	4.06798e-10	0.000568928	1	23810000	24510000	0
G	16	17560000	17580000	16	17920000	17940000	.	.	.	.	0,255,255	38	12.5104	12.364	12.3638	14.8508	0.000420835	4.20506e-06	9.39715e-06	0.000568928	2	17580000	17930000	10000
G	16	74340000	74360000	16	74680000	74700000	.	.	.	.	0,255,255	37	15.4744	10.3404	10.1248	12.6532	0.000850596	1.08263e-05	2.27931e-05	0.0011733	3	74356666	74670000	21082
G	16	75500000	75520000	16	75780000	75800000	.	.	.	.	0,255,255	35	12.1258	9.3085	13.5518	11.185	9.7188e-05	1.02384e-06	0.00428755	0.00014012	3	75516666	75803333	14908
G	16	70400000	70420000	16	70680000	70700000	.	.	.	.	0,255,255	35	10.5084	10.2908	14.4141	11.917	9.7188e-05	6.73644e-05	0.00428755	0.00014012	1	70410000	70690000	0
G	16	70160000	70180000	16	74380000	74400000	.	.	.	.	0,255,255	35	1.20025	3.11576	8.97207	2.25318	4.29741e-31	2.36623e-19	2.60394e-06	2.16822e-22	6	70176666	74386666	26875
G	16	30960000	30980000	16	31460000	31480000	.	.	.	.	0,255,255	34	5.17943	3.96464	3.62216	9.64312	4.47673e-10	7.01498e-13	4.32575e-15	7.55868e-06	1	30970000	31470000	0
G	16	10340000	10360000	16	10820000	10840000	.	.	.	.	0,255,255	33	8.58054	9.21458	11.9713	12.3807	1.33619e-05	8.7976e-06	0.000641389	0.0149253	3	10356666	10816666	14907
G	16	81040000	81060000	16	81760000	81780000	.	.	.	.	0,255,255	32	7.08513	6.87175	7.56154	10.3261	6.72015e-07	4.36022e-07	9.23504e-07	0.00145027	2	81040000	81770000	10000
G	16	57600000	57620000	16	58020000	58040000	.	.	.	.	0,255,255	32	8.76171	7.19403	10.6656	8.35054	3.65068e-05	4.36022e-07	0.00137869	5.27005e-05	1	57610000	58030000	0
G	16	82620000	82640000	16	83240000	83260000	.	.	.	.	0,255,255	31	9.52054	9.88171	11.074	10.9378	9.39173e-05	0.0017752	0.00285147	0.00300365	1	82630000	83250000	0
G	16	72540000	72560000	16	73240000	73260000	.	.	.	.	0,255,255	30	8.11102	8.44035	12.0044	8.34604	0.000226592	0.000170239	0.00563215	0.000340333	1	72550000	73250000	0
G	16	54760000	54780000	16	55200000	55220000	.	.	.	.	0,255,255	30	8.29304	11.5757	12.0006	11.0144	0.000226592	0.00366747	0.00563215	0.00603059	1	54770000	55210000	0
G	16	31000000	31020000	16	31440000	31460000	.	.	.	.	0,255,255	30	5.86942	5.63798	6.2596	12.2996	1.37328e-07	9.36396e-08	9.58496e-06	0.00603059	1	31010000	31450000	0
G	16	26620000	26640000	16	27060000	27080000	.	.	.	.	0,255,255	30	8.49327	9.01167	8.4537	12.012	0.000226592	0.000170239	0.000317014	0.00603059	1	26630000	27070000	0
G	16	11060000	11080000	16	11800000	11820000	.	.	.	.	0,255,255	30	8.06035	6.41041	14.5727	5.83493	0.000226592	4.93173e-06	0.0687962	1.50814e-07	2	11060000	11820000	14142
G	16	51160000	51180000	16	52000000	52020000	.	.	.	.	0,255,255	29	7.20607	8.51953	9.23843	12.1926	2.07803e-05	0.000414028	0.000719798	0.0116507	1	51170000	52010000	0
G	16	25840000	25860000	16	27120000	27140000	.	.	.	.	0,255,255	29	8.01299	7.15881	8.73826	9.92651	0.000537055	1.49159e-05	0.000719798	0.0116507	3	25843333	27123333	14907
G	16	21200000	21220000	16	22660000	22680000	.	.	.	.	0,255,255	29	8.93082	8.13548	9.8413	11.2556	0.000537055	0.000414028	0.000719798	0.0116507	1	21210000	22670000	0
G	16	10640000	10660000	16	11000000	11020000	.	.	.	.	0,255,255	29	9.42865	7.66726	10.0118	11.4195	0.000537055	1.49159e-05	0.0108805	0.0116507	3	10636666	11016666	27487
G	16	88800000	88820000	16	89240000	89260000	.	.	.	.	0,255,255	27	6.41083	5.17283	3.99562	8.34286	0.000162787	4.73567e-06	1.24565e-07	0.00380603	1	88810000	89250000	0
G	16	58040000	58060000	16	58520000	58540000	.	.	.	.	0,255,255	27	7.06414	7.06598	7.32253	9.19799	0.000162787	0.000129915	0.000223215	0.00380603	1	58050000	58530000	0
G	16	21160000	21180000	16	21560000	21580000	.	.	.	.	0,255,255	27	5.87516	5.5989	7.68055	9.36893	6.40377e-06	4.73567e-06	0.000223215	0.00380603	1	21170000	21570000	0
G	16	14020000	14040000	16	14680000	14700000	.	.	.	.	0,255,255	27	10.2045	7.61181	11.5449	8.19496	0.0260795	0.000129915	0.0359919	0.00380603	2	14030000	14700000	10000
G	16	85840000	85860000	16	86540000	86560000	.	.	.	.	0,255,255	26	8.33674	6.26557	8.31924	9.52065	0.00542429	0.000346284	0.00754183	0.00791229	3	85850000	86550000	20000
G	16	9300000	9320000	16	10300000	10320000	.	.	.	.	0,255,255	26	8.04999	8.90087	9.13516	9.43523	0.00542429	0.00501712	0.00754183	0.00791229	2	9300000	10310000	10000
G	16	77260000	77280000	16	78000000	78020000	.	.	.	.	0,255,255	24	5.53869	5.69987	6.69172	7.22763	0.000174253	0.000168501	0.00347037	0.00338776	2	77270000	78030000	20000
G	16	31220000	31240000	16	31860000	31880000	.	.	.	.	0,255,255	23	5.99194	5.26632	6.78262	6.87478	0.000496366	0.000504587	0.00775376	0.00745358	1	31230000	31870000	0
G	16	21780000	21800000	16	22640000	22660000	.	.	.	.	0,255,255	23	2.32044	4.90237	6.24615	4.52176	1.44254e-10	2.80067e-05	0.00775376	5.27067e-05	2	21790000	22640000	10000
G	16	27680000	27700000	16	28300000	28320000	.	.	.	.	0,255,255	20	4.44369	3.94373	4.82297	4.09469	0.000932541	8.70957e-05	0.00157949	0.00191204	1	27690000	28310000	0
G	16	5280000	5300000	16	6680000	6700000	.	.	.	.	0,255,255	20	4.49785	4.42607	5.32027	5.55894	0.000932541	0.00114941	0.0123502	0.0124129	2	5290000	6700000	10000
G	16	74720000	74740000	16	75460000	75480000	.	.	.	.	0,255,255	19	2.56425	4.03712	4.34001	4.86194	1.07181e-05	0.00327682	0.00430491	0.00515382	1	74730000	75470000	0
G	16	25840000	25860000	16	27380000	27400000	.	.	.	.	0,255,255	19	2.71519	3.38819	4.44938	4.48792	1.07181e-05	0.000340114	0.00430491	0.00515382	1	25850000	27390000	0
G	16	21760000	21780000	16	22580000	22600000	.	.	.	.	0,255,255	15	1.39072	2.02573	2.42319	2.4928	3.95567e-06	0.000934802	0.00113524	0.000924583	1	21770000	22590000	0
G	16	15080000	15100000	16	70060000	70080000	.	.	.	.	0,255,255	14	0.233065	0.37595	0.39509	1.23493	5.96289e-05	0.000363018	0.000309322	0.000407866	1	15090000	70070000	0
G	16	70200000	70220000	16	74440000	74460000	.	.	.	.	0,255,255	13	0.135293	0.491428	1.43244	0.594761	0.000575969	0.00326333	0.000505348	0.00343629	1	70210000	74450000	0
G	17	57820000	57840000	17	57920000	57940000	.	.	.	.	0,255,255	148	54.4355	40.2281	44.7533	50.5031	8.02738e-17	4.97877e-25	1.57996e-24	2.31701e-16	3	57823333	57943333	14907
G	17	47640000	47660000	17	47760000	47780000	.	.	.	.	0,255,255	140	56.1249	42.0976	44.5718	45.9642	2.82569e-14	1.09813e-21	2.32319e-21	2.00755e-21	2	47660000	47770000	10000
G	17	48240000	48260000	17	48360000	48380000	.	.	.	.	0,255,255	137	53.3354	46.4918	42.4338	46.717	2.20991e-13	1.82187e-20	3.21194e-20	3.23814e-20	3	48256666	48363333	14908
G	17	48920000	48940000	17	49020000	49040000	.	.	.	.	0,255,255	127	56.152	42.9708	38.9014	54.3134	1.82027e-10	1.63187e-16	4.40179e-16	7.88101e-10	2	48930000	49040000	10000
G	17	41640000	41660000	17	41740000	41760000	.	.	.	.	0,255,255	126	56.2005	50.5701	51.8609	63.7176	3.03311e-10	1.68017e-09	1.01571e-09	3.46018e-05	2	41630000	41750000	20000
G	17	42600000	42620000	17	42700000	42720000	.	.	.	.	0,255,255	122	40.1516	39.5834	41.2116	44.6648	1.51133e-14	1.16803e-14	2.39839e-14	1.64421e-14	2	42600000	42710000	10000
G	17	41460000	41480000	17	41560000	41580000	.	.	.	.	0,255,255	116	48.1968	35.8269	46.9609	38.9597	1.18713e-12	4.89093e-19	2.04537e-12	1.67841e-12	1	41470000	41570000	0
G	17	48620000	48640000	17	48760000	48780000	.	.	.	.	0,255,255	115	30.1338	29.1023	39.0888	35.3239	1.68534e-25	4.71168e-26	4.01308e-12	2.72139e-18	2	48630000	48780000	10000
G	17	57380000	57400000	17	57500000	57520000	.	.	.	.	0,255,255	113	37.2049	40.4496	49.9607	46.0187	1.2902e-17	1.08969e-11	1.62922e-06	1.61156e-11	6	57376666	57530000	50771
G	17	43340000	43360000	17	43460000	43480000	.	.	.	.	0,255,255	111	45.5972	42.1498	37.6445	54.1006	4.42579e-11	4.57909e-11	6.78892e-17	4.37559e-06	1	43350000	43470000	0
G	17	37140000	37160000	17	37300000	37320000	.	.	.	.	0,255,255	105	37.5873	37.5879	36.4993	53.1393	1.98686e-14	1.3781e-14	1.82613e-14	8.81864e-05	1	37150000	37310000	0
G	17	55920000	55940000	17	56060000	56080000	.	.	.	.	0,255,255	104	50.8568	33.977	33.2828	36.2926	4.74767e-05	3.2898e-14	4.3307e-14	5.54599e-14	3	55943333	56063333	14907
G	17	47960000	47980000	17	48060000	48080000	.	.	.	.	0,255,255	104	52.7161	43.3581	56.7978	45.3539	4.74767e-05	7.05577e-09	0.000130352	1.00041e-08	4	47950000	48075000	20616
G	17	42840000	42860000	17	42940000	42960000	.	.	.	.	0,255,255	104	44.214	31.7845	35.4806	44.6889	6.11408e-09	3.2898e-14	4.3307e-14	1.00041e-08	2	42850000	42960000	10000
G	17	59700000	59720000	17	59900000	59920000	.	.	.	.	0,255,255	103	35.3235	29.546	33.7114	37.4857	1.0326e-13	4.27399e-20	1.01406e-13	1.19233e-13	5	59706000	59910000	36000
G	17	71240000	71260000	17	71360000	71380000	.	.	.	.	0,255,255	102	36.9408	28.2988	31.6048	33.4994	2.40622e-13	1.25965e-19	2.45649e-13	2.75015e-13	4	71250000	71365000	20616
G	17	1800000	1820000	17	1920000	1940000	.	.	.	.	0,255,255	99	39.0413	30.0677	33.7001	37.9582	1.36224e-07	3.13707e-18	2.9516e-12	3.06842e-12	3	1810000	1930000	20000
G	17	46400000	46420000	17	46660000	46680000	.	.	.	.	0,255,255	98	24.3913	25.6487	27.2106	34.3766	6.6024e-24	8.92973e-18	1.68139e-17	7.07922e-12	7	46415714	46678571	31944
G	17	6940000	6960000	17	7040000	7060000	.	.	.	.	0,255,255	98	48.9886	36.0123	40.288	42.0502	0.000607477	4.93788e-12	4.66075e-07	4.5895e-07	3	6950000	7070000	20000
G	17	40980000	41000000	17	41080000	41100000	.	.	.	.	0,255,255	96	51.4503	41.7141	46.0637	51.3209	0.00126175	1.12279e-06	1.46298e-06	0.00375937	1	40990000	41090000	0
G	17	1980000	2000000	17	2140000	2160000	.	.	.	.	0,255,255	96	45.7684	40.9184	54.458	43.6039	8.00031e-07	1.12279e-06	0.0032502	1.39195e-06	6	1966666	2170000	30732
G	17	32520000	32540000	17	32680000	32700000	.	.	.	.	0,255,255	95	32.8768	24.8083	34.9627	25.1436	6.73088e-11	1.99805e-16	7.61779e-11	3.78441e-16	4	32520000	32675000	26926
G	17	19900000	19920000	17	20000000	20020000	.	.	.	.	0,255,255	95	45.4639	34.7225	39.648	37.7948	1.42994e-06	5.48368e-11	2.57362e-06	7.94804e-11	3	19896666	20003333	14908
G	17	66760000	66780000	17	67220000	67240000	.	.	.	.	0,255,255	94	17.0222	15.0068	19.8133	22.5735	4.18521e-28	1.46251e-35	1.0235e-21	1.26351e-21	4	66770000	67240000	22361
G	17	38580000	38600000	17	38700000	38720000	.	.	.	.	0,255,255	93	44.2811	41.6614	36.2864	49.8623	4.35991e-06	6.27922e-06	3.60882e-10	0.0107075	3	38590000	38716666	24037
G	17	36000000	36020000	17	36140000	36160000	.	.	.	.	0,255,255	93	35.2779	33.712	47.0887	35.5697	3.18435e-10	2.6554e-10	7.9073e-06	3.84997e-10	3	36010000	36170000	20000
G	17	17780000	17800000	17	17920000	17940000	.	.	.	.	0,255,255	93	38.6685	34.3186	41.9852	43.7626	3.18435e-10	2.6554e-10	7.9073e-06	7.42203e-06	3	17790000	17930000	20000
G	17	66540000	66560000	17	66740000	66760000	.	.	.	.	0,255,255	92	31.5664	25.0932	29.2857	35.4188	6.97224e-10	4.14384e-15	6.78521e-15	8.46675e-10	3	66550000	66750000	20000
G	17	43000000	43020000	17	43100000	43120000	.	.	.	.	0,255,255	92	48.7516	42.6635	53.5731	43.3037	7.27053e-06	1.07067e-05	0.0131419	1.25751e-05	3	42996666	43103333	14908
G	17	29880000	29900000	17	30160000	30180000	.	.	.	.	0,255,255	92	24.0433	20.4025	24.9291	30.0297	1.16475e-20	6.39636e-21	6.78521e-15	7.41497e-15	6	29886666	30183333	26875
G	17	66240000	66260000	17	66420000	66440000	.	.	.	.	0,255,255	91	35.2219	29.498	27.8799	38.9085	1.50065e-09	1.11567e-14	1.83454e-14	2.08938e-05	3	66270000	66430000	20000
G	17	33940000	33960000	17	34060000	34080000	.	.	.	.	0,255,255	91	34.186	30.2164	33.6587	34.4177	1.50065e-09	1.11567e-14	1.67747e-09	1.83835e-09	2	33940000	34070000	10000
G	17	27080000	27100000	17	27220000	27240000	.	.	.	.	0,255,255	91	36.2865	30.1459	39.6977	28.4847	1.50065e-09	1.11567e-14	2.26677e-05	2.01251e-14	4	27090000	27220000	22361
G	17	76480000	76500000	17	76700000	76720000	.	.	.	.	0,255,255	90	27.8932	25.5175	34.8845	27.9585	5.43519e-14	3.03902e-14	3.56767e-09	5.32164e-14	3	76483333	76736666	27487
G	17	66600000	66620000	17	66740000	66760000	.	.	.	.	0,255,255	90	37.7649	34.2985	34.3039	47.8767	3.22381e-09	2.61883e-09	3.56767e-09	3.54513e-05	1	66610000	66750000	0
G	17	15140000	15160000	17	15400000	15420000	.	.	.	.	0,255,255	90	30.0769	22.6239	33.7891	28.021	5.43519e-14	7.14192e-20	3.56767e-09	5.32164e-14	5	15154000	15418000	25298
G	17	74280000	74300000	17	74380000	74400000	.	.	.	.	0,255,255	89	49.351	34.3973	36.5584	39.8119	0.0142409	5.34669e-09	7.35771e-09	5.89229e-05	2	74300000	74400000	14142
G	17	59500000	59520000	17	59640000	59660000	.	.	.	.	0,255,255	89	38.2569	30.5013	44.6007	28.3728	6.6951e-09	7.85023e-14	6.2416e-05	1.36402e-13	5	59502000	59634000	25298
G	17	49080000	49100000	17	49200000	49220000	.	.	.	.	0,255,255	89	37.0908	34.3194	41.2415	37.6952	6.6951e-09	5.34669e-09	6.2416e-05	8.13344e-09	3	49090000	49210000	20000
G	17	4120000	4140000	17	4300000	4320000	.	.	.	.	0,255,255	89	29.6243	26.3474	30.7913	28.7505	1.37962e-13	7.85023e-14	1.26238e-13	1.36402e-13	2	4120000	4310000	10000
G	17	28140000	28160000	17	28240000	28260000	.	.	.	.	0,255,255	88	36.6739	38.2476	39.801	38.9191	1.38921e-08	1.11855e-08	0.000102007	9.58501e-05	3	28136666	28256666	14907
G	17	74840000	74860000	17	75040000	75060000	.	.	.	.	0,255,255	87	32.7849	27.64	26.3012	37.4092	2.75055e-08	5.22644e-13	8.11379e-13	3.36668e-08	4	74835000	75060000	26926
G	17	70580000	70600000	17	70700000	70720000	.	.	.	.	0,255,255	87	35.4937	26.3911	30.2678	21.752	2.75055e-08	5.22644e-13	8.11379e-13	5.02146e-18	3	70583333	70703333	14907
G	17	680000	700000	17	880000	900000	.	.	.	.	0,255,255	87	38.9257	30.7078	33.3781	34.8847	8.65078e-05	5.22644e-13	3.11128e-08	3.36668e-08	8	695000	877500	46704
G	17	46740000	46760000	17	46860000	46880000	.	.	.	.	0,255,255	86	42.2853	39.3054	46.0803	45.3818	0.000136216	0.000211753	0.000254854	0.000236755	2	46760000	46870000	10000
G	17	75080000	75100000	17	75180000	75200000	.	.	.	.	0,255,255	84	45.047	38.1816	48.6267	42.1095	0.000342668	1.77849e-07	0.00063773	0.000611679	3	75090000	75210000	20000
G	17	74100000	74120000	17	74280000	74300000	.	.	.	.	0,255,255	84	40.0141	34.8085	35.4903	36.0829	0.000342668	1.77849e-07	2.42947e-07	2.58485e-07	5	74126000	74278000	25298
G	17	63280000	63300000	17	63540000	63560000	.	.	.	.	0,255,255	84	31.3736	28.0135	35.8686	30.5855	2.14398e-07	7.96484e-12	2.42947e-07	1.39001e-11	4	63280000	63540000	14142
G	17	47380000	47400000	17	47480000	47500000	.	.	.	.	0,255,255	84	45.9201	34.9473	43.4543	38.0553	0.000342668	1.77849e-07	0.00063773	2.58485e-07	2	47380000	47480000	14142
G	17	19400000	19420000	17	19660000	19680000	.	.	.	.	0,255,255	84	27.6679	23.8754	27.1009	29.9121	1.33111e-11	7.18142e-17	1.21665e-11	1.39001e-11	4	19415000	19665000	25495
G	17	60780000	60800000	17	61040000	61060000	.	.	.	.	0,255,255	83	28.016	24.858	34.0061	33.2383	3.16502e-11	1.93816e-11	4.71975e-07	5.07845e-07	2	60790000	61040000	10000
G	17	39700000	39720000	17	39800000	39820000	.	.	.	.	0,255,255	83	45.4434	28.6362	31.3833	39.9517	0.000529795	1.93816e-11	4.71975e-07	0.000938999	1	39710000	39810000	0
G	17	72360000	72380000	17	72460000	72480000	.	.	.	.	0,255,255	82	35.1251	35.0511	35.1677	35.039	7.82539e-07	6.60112e-07	9.01319e-07	9.45706e-07	2	72360000	72460000	14142
G	17	5480000	5500000	17	6320000	6340000	.	.	.	.	0,255,255	82	19.035	12.8237	13.8996	18.5397	5.15864e-21	3.06019e-27	1.16419e-26	8.5063e-21	9	5503333	6316666	37712
G	17	66260000	66280000	17	66380000	66400000	.	.	.	.	0,255,255	81	40.8534	39.8865	47.6577	41.6032	0.00127171	0.00209988	0.00237239	0.0022373	1	66270000	66390000	0
G	17	54880000	54900000	17	55000000	55020000	.	.	.	.	0,255,255	81	33.8878	29.5314	27.4411	37.8563	1.49025e-06	1.10895e-10	1.69838e-10	1.78301e-06	2	54900000	55010000	10000
G	17	33320000	33340000	17	33420000	33440000	.	.	.	.	0,255,255	81	44.5537	33.2548	43.8844	35.2257	0.00127171	1.26122e-06	0.00237239	1.78301e-06	3	33323333	33443333	14907
G	17	9860000	9880000	17	10120000	10140000	.	.	.	.	0,255,255	81	20.1683	21.1561	26.5526	28.9821	3.70719e-15	2.01071e-15	1.69838e-10	1.95598e-10	2	9850000	10130000	20000
G	17	27680000	27700000	17	27880000	27900000	.	.	.	.	0,255,255	80	35.0379	25.7432	28.6727	27.9807	2.7694e-06	2.63615e-10	3.93559e-10	4.52278e-10	4	27700000	27880000	14142
G	17	15720000	15740000	17	15880000	15900000	.	.	.	.	0,255,255	80	33.4855	28.3974	31.089	34.2852	2.7694e-06	2.63615e-10	3.26017e-06	3.3723e-06	5	15742000	15886000	37947
G	17	64240000	64260000	17	64620000	64640000	.	.	.	.	0,255,255	79	27.6522	21.6982	31.7119	27.2503	9.67665e-10	1.69664e-14	6.01111e-06	1.04225e-09	14	64235714	64644285	56134
G	17	56380000	56400000	17	56520000	56540000	.	.	.	.	0,255,255	79	28.982	29.7467	32.7688	30.8334	9.67665e-10	6.20432e-10	6.01111e-06	1.04225e-09	1	56390000	56530000	0
G	17	45580000	45600000	17	45680000	45700000	.	.	.	.	0,255,255	79	32.5115	32.764	34.6632	36.4773	5.05759e-06	4.39614e-06	6.01111e-06	6.24902e-06	1	45590000	45690000	0
G	17	17240000	17260000	17	17540000	17560000	.	.	.	.	0,255,255	79	19.332	15.7295	23.5128	21.2606	2.60479e-19	1.00303e-19	3.18374e-14	3.32056e-14	5	17254000	17542000	25298
G	17	31100000	31120000	17	31220000	31240000	.	.	.	.	0,255,255	78	33.8754	30.0236	33.2848	27.8055	8.97671e-06	1.40671e-09	1.08232e-05	2.29554e-09	2	31110000	31220000	10000
G	17	27280000	27300000	17	27420000	27440000	.	.	.	.	0,255,255	78	37.2617	25.9838	28.9352	26.9344	8.97671e-06	1.40671e-09	2.12438e-09	2.29554e-09	3	27296666	27423333	14908
G	17	6800000	6820000	17	6900000	6920000	.	.	.	.	0,255,255	78	38.2334	30.1357	34.8763	32.1729	8.97671e-06	1.40671e-09	1.08232e-05	1.12914e-05	1	6810000	6910000	0
G	17	66760000	66780000	17	66960000	66980000	.	.	.	.	0,255,255	77	30.7146	25.3313	28.9746	28.7324	4.98983e-09	3.20132e-09	4.72142e-09	5.32748e-09	4	66790000	66955000	32016
G	17	62100000	62120000	17	62200000	62220000	.	.	.	.	0,255,255	77	37.7642	29.4257	34.1712	32.9962	1.59843e-05	3.20132e-09	1.96817e-05	1.96351e-05	2	62110000	62220000	10000
G	17	42280000	42300000	17	42400000	42420000	.	.	.	.	0,255,255	77	36.1128	27.1765	28.6566	28.3617	1.59843e-05	3.20132e-09	4.72142e-09	5.32748e-09	2	42290000	42400000	10000
G	17	29740000	29760000	17	29840000	29860000	.	.	.	.	0,255,255	77	39.2736	31.4916	39.4016	38.3794	0.00618751	1.42996e-05	0.0112502	1.96351e-05	1	29750000	29850000	0
G	17	70720000	70740000	17	71180000	71200000	.	.	.	.	0,255,255	76	22.181	21.931	27.1714	26.9062	6.3636e-13	3.91725e-13	1.05105e-08	1.18297e-08	7	70724285	71184285	42857
G	17	25680000	25700000	17	25920000	25940000	.	.	.	.	0,255,255	76	32.3082	26.9371	31.5081	37.3187	2.86164e-05	7.13798e-09	3.49341e-05	3.48203e-05	6	25693333	25910000	26034
G	17	65360000	65380000	17	65680000	65700000	.	.	.	.	0,255,255	75	26.2209	19.973	28.8554	23.2069	2.33694e-08	1.07987e-12	2.28366e-08	1.99703e-12	6	65370000	65683333	33333
G	17	45760000	45780000	17	45860000	45880000	.	.	.	.	0,255,255	75	41.034	26.2034	29.4285	37.8459	0.0125873	1.59865e-08	2.28366e-08	6.1964e-05	1	45770000	45870000	0
G	17	32540000	32560000	17	32640000	32660000	.	.	.	.	0,255,255	75	29.165	34.6759	35.872	32.8604	2.33694e-08	4.58973e-05	6.19748e-05	6.1964e-05	1	32550000	32650000	0
G	17	29340000	29360000	17	29520000	29540000	.	.	.	.	0,255,255	75	28.869	29.9128	34.5674	33.7263	2.33694e-08	1.59865e-08	6.19748e-05	6.1964e-05	3	29343333	29536666	14908
G	17	47500000	47520000	17	47620000	47640000	.	.	.	.	0,255,255	74	34.9939	26.1049	34.6757	31.5524	8.80744e-05	3.52038e-08	0.000109382	0.00010795	4	47510000	47625000	20616
G	17	27960000	27980000	17	28080000	28100000	.	.	.	.	0,255,255	74	39.2357	36.9562	41.5007	44.1327	0.0177236	8.02951e-05	0.0323255	0.03101	2	27960000	28100000	14142
G	17	76840000	76860000	17	76960000	76980000	.	.	.	.	0,255,255	73	34.4214	27.7798	31.6925	36.0347	0.000149944	7.53725e-08	0.000186477	0.000186341	1	76850000	76970000	0
G	17	61980000	62000000	17	62080000	62100000	.	.	.	.	0,255,255	73	38.4646	30.7962	35.8331	34.7319	0.000149944	7.53725e-08	0.000186477	0.000186341	2	61990000	62100000	10000
G	17	40460000	40480000	17	40660000	40680000	.	.	.	.	0,255,255	73	23.1801	21.9903	25.7878	33.1956	1.27337e-11	8.18194e-12	1.0945e-07	0.000186341	3	40463333	40676666	14908
G	17	26080000	26100000	17	26200000	26220000	.	.	.	.	0,255,255	73	26.8623	25.0148	26.5575	28.1673	1.10855e-07	7.53725e-08	1.0945e-07	1.21966e-07	2	26100000	26210000	10000
G	17	43720000	43740000	17	43900000	43920000	.	.	.	.	0,255,255	72	28.1224	24.5201	35.0178	24.9653	2.3085e-07	2.15474e-11	0.000317699	2.52549e-07	5	43726000	43914000	33941
G	17	21020000	21040000	17	21140000	21160000	.	.	.	.	0,255,255	72	36.6235	32.447	38.4741	30.0165	0.000252126	0.000235062	0.000317699	2.52549e-07	2	21030000	21160000	10000
G	17	76280000	76300000	17	76400000	76420000	.	.	.	.	0,255,255	71	35.5612	33.9569	46.2877	41.8061	0.000415893	0.000398361	0.0799426	0.0773488	3	76270000	76410000	20000
G	17	61500000	61520000	17	61680000	61700000	.	.	.	.	0,255,255	70	30.8229	23.5372	30.2927	22.3745	9.75859e-07	1.43986e-10	9.78558e-07	2.34402e-10	1	61510000	61690000	0
G	17	30340000	30360000	17	30440000	30460000	.	.	.	.	0,255,255	70	38.7337	33.2564	37.8195	38.3436	0.000669599	0.000652915	0.000872603	0.000864534	4	30340000	30450000	22361
G	17	3800000	3820000	17	3900000	3920000	.	.	.	.	0,255,255	70	34.1851	30.1342	29.9038	35.4081	0.000669599	6.80942e-07	9.78558e-07	0.000864534	1	3810000	3910000	0
G	17	65380000	65400000	17	65620000	65640000	.	.	.	.	0,255,255	68	25.1941	24.1937	35.1348	25.5442	3.92347e-06	9.12319e-10	0.00227662	4.27063e-06	2	65380000	65630000	10000
G	17	56780000	56800000	17	57080000	57100000	.	.	.	.	0,255,255	68	21.3042	18.5937	21.2638	23.8889	1.30827e-09	5.98122e-14	1.38718e-09	1.44799e-09	4	56785000	57085000	35355
G	17	33480000	33500000	17	33860000	33880000	.	.	.	.	0,255,255	68	20.6437	16.5529	17.2543	29.0291	1.30827e-09	5.98122e-14	1.75473e-13	4.27063e-06	6	33506666	33863333	31447
G	17	12140000	12160000	17	12560000	12580000	.	.	.	.	0,255,255	67	23.0643	23.5376	29.3644	29.1958	3.23989e-09	2.24195e-09	7.76416e-06	8.29098e-06	2	12160000	12570000	10000
G	17	79260000	79280000	17	79440000	79460000	.	.	.	.	0,255,255	66	25.4868	26.1723	29.3549	30.7856	1.47347e-05	1.06205e-05	1.50762e-05	1.61461e-05	5	79246000	79454000	28844
G	17	73640000	73660000	17	73740000	73760000	.	.	.	.	0,255,255	66	37.3248	28.597	27.9117	38.0155	0.00411205	1.06205e-05	1.50762e-05	0.00542433	2	73640000	73750000	10000
G	17	17580000	17600000	17	17760000	17780000	.	.	.	.	0,255,255	66	31.8752	27.1201	38.165	25.2263	0.00411205	1.06205e-05	0.00560357	1.61461e-05	1	17590000	17770000	0
G	17	77820000	77840000	17	77940000	77960000	.	.	.	.	0,255,255	65	26.5499	28.8656	33.0471	34.1215	2.79503e-05	2.04135e-05	0.00852735	0.00829007	2	77820000	77960000	14142
G	17	62960000	62980000	17	63180000	63200000	.	.	.	.	0,255,255	65	24.5959	19.4367	22.1529	26.3098	2.79503e-05	1.69685e-12	1.92342e-08	3.06207e-05	3	62950000	63190000	20000
G	17	25560000	25580000	17	25660000	25680000	.	.	.	.	0,255,255	65	32.3818	25.3576	28.5578	27.1812	0.00621962	2.04135e-05	2.90589e-05	3.06207e-05	2	25560000	25660000	14142
G	17	74780000	74800000	17	75040000	75060000	.	.	.	.	0,255,255	64	26.312	20.373	19.4863	31.536	5.18273e-05	3.04283e-08	1.31579e-11	0.0125312	3	74776666	75063333	27487
G	17	59060000	59080000	17	59460000	59480000	.	.	.	.	0,255,255	64	19.3685	17.1652	24.8106	23.0775	9.17761e-12	4.99846e-12	5.40182e-05	4.63115e-08	5	59082000	59466000	25298
G	17	53600000	53620000	17	53700000	53720000	.	.	.	.	0,255,255	64	28.9969	27.5365	35.8516	25.0348	5.18273e-05	3.92441e-05	0.0128088	5.7447e-05	1	53610000	53710000	0
G	17	53060000	53080000	17	53420000	53440000	.	.	.	.	0,255,255	64	18.4651	14.2897	21.8068	12.3041	9.17761e-12	3.24659e-16	4.47354e-08	1.39778e-19	1	53070000	53430000	0
G	17	78960000	78980000	17	79060000	79080000	.	.	.	.	0,255,255	63	31.2794	21.1576	22.8723	29.5198	0.0137402	7.08708e-08	1.01913e-07	0.000105485	2	78980000	79080000	14142
G	17	54920000	54940000	17	55020000	55040000	.	.	.	.	0,255,255	63	30.1656	26.743	30.6965	28.3853	9.47612e-05	7.2824e-05	9.95566e-05	0.000105485	1	54930000	55030000	0
G	17	43680000	43700000	17	44340000	44360000	.	.	.	.	0,255,255	63	5.59833	9.63989	18.0798	10.4426	3.11775e-34	3.07673e-24	3.51259e-11	4.41929e-19	12	43670000	44340000	36056
G	17	40120000	40140000	17	40260000	40280000	.	.	.	.	0,255,255	63	32.7901	29.5242	25.0116	33.1931	0.0137402	7.2824e-05	9.95566e-05	0.0186416	2	40120000	40270000	10000
G	17	10220000	10240000	17	10500000	10520000	.	.	.	.	0,255,255	63	20.6965	17.1591	20.4786	20.8148	9.58217e-08	1.43702e-11	1.01913e-07	1.06197e-07	2	10230000	10520000	10000
G	17	8460000	8480000	17	8640000	8660000	.	.	.	.	0,255,255	63	25.878	24.632	25.2072	35.2662	9.47612e-05	7.2824e-05	9.95566e-05	0.0186416	1	8470000	8650000	0
G	17	39000000	39020000	17	39800000	39820000	.	.	.	.	0,255,255	61	14.1547	11.4825	15.696	16.8526	4.94917e-14	1.85491e-18	2.71741e-10	2.93325e-10	8	39005000	39815000	45277
G	17	34960000	34980000	17	35400000	35420000	.	.	.	.	0,255,255	61	15.634	14.1811	24.3404	14.4114	2.06693e-10	1.56449e-14	5.36112e-07	5.74556e-14	1	34970000	35410000	0
G	17	43680000	43700000	17	44280000	44300000	.	.	.	.	0,255,255	60	4.50683	11.1987	22.9189	9.11836	5.61339e-37	8.13382e-18	1.17483e-06	8.74167e-22	1	43690000	44290000	0
G	17	39000000	39020000	17	39700000	39720000	.	.	.	.	0,255,255	60	21.2898	20.7865	29.5986	20.2485	1.04208e-06	8.05338e-07	0.00056884	1.16808e-06	1	39010000	39710000	0
G	17	78400000	78420000	17	78940000	78960000	.	.	.	.	0,255,255	59	15.4102	10.7506	17.3776	13.005	5.58252e-13	3.36954e-17	1.98392e-09	6.33048e-13	5	78418000	78942000	34176
G	17	30800000	30820000	17	31080000	31100000	.	.	.	.	0,255,255	59	20.2369	16.1656	23.2666	15.7781	2.22887e-06	8.82483e-10	2.48327e-06	2.16455e-09	3	30803333	31076666	14908
G	17	67560000	67580000	17	68140000	68160000	.	.	.	.	0,255,255	58	18.919	16.3429	23.0758	21.1155	3.85443e-09	2.36574e-09	5.22829e-06	5.28791e-06	6	67583333	68150000	33334
G	17	53600000	53620000	17	53840000	53860000	.	.	.	.	0,255,255	57	22.6554	19.549	24.2772	24.2819	9.96121e-06	6.28171e-09	1.08947e-05	1.10332e-05	1	53610000	53850000	0
G	17	46220000	46240000	17	46660000	46680000	.	.	.	.	0,255,255	57	20.8258	18.8204	19.9873	29.2441	9.96121e-06	6.28171e-09	1.08947e-05	0.00291556	4	46240000	46675000	26926
G	17	2720000	2740000	17	2900000	2920000	.	.	.	.	0,255,255	56	20.3233	16.5675	19.849	20.7424	2.07147e-05	1.63668e-08	2.24859e-05	2.22721e-05	1	2730000	2910000	0
G	17	55280000	55300000	17	55820000	55840000	.	.	.	.	0,255,255	55	15.6514	16.6955	19.492	21.7172	6.17834e-08	4.18345e-08	8.48411e-08	4.50358e-05	15	55259333	55836666	76930
G	17	53440000	53460000	17	53560000	53580000	.	.	.	.	0,255,255	55	21.4054	21.2213	22.5629	25.3131	4.13568e-05	3.28787e-05	4.51669e-05	0.0077231	3	53443333	53583333	14907
G	17	33540000	33560000	17	33860000	33880000	.	.	.	.	0,255,255	55	18.6078	17.2928	17.5415	30.737	6.17834e-08	4.18345e-08	8.48411e-08	0.0077231	1	33550000	33870000	0
G	17	10640000	10660000	17	10740000	10760000	.	.	.	.	0,255,255	55	29.4874	21.0352	23.6123	27.419	0.00626236	3.28787e-05	4.51669e-05	0.0077231	1	10650000	10750000	0
G	17	28820000	28840000	17	29040000	29060000	.	.	.	.	0,255,255	53	22.1201	21.7436	25.3011	29.3316	0.000153399	0.000128764	0.0180269	0.0190987	2	28820000	29050000	10000
G	17	13240000	13260000	17	13480000	13500000	.	.	.	.	0,255,255	53	25.9377	21.7222	29.2959	21.4357	0.0149326	0.000128764	0.0180269	0.000171253	3	13250000	13476666	33333
G	17	62000000	62020000	17	62200000	62220000	.	.	.	.	0,255,255	52	17.338	18.578	22.0238	23.0191	8.70981e-07	6.06736e-07	0.000323203	0.000323183	2	62000000	62210000	10000
G	17	61140000	61160000	17	61480000	61500000	.	.	.	.	0,255,255	52	20.6283	18.59	21.3502	23.2356	0.00028488	6.06736e-07	0.000323203	0.000323183	2	61160000	61490000	10000
G	17	57980000	58000000	17	58100000	58120000	.	.	.	.	0,255,255	51	19.6812	15.9466	16.6868	20.2415	0.000524585	1.42248e-06	2.77709e-06	0.000596162	1	57990000	58110000	0
G	17	55920000	55940000	17	56180000	56200000	.	.	.	.	0,255,255	51	14.2771	15.7418	27.2958	15.4567	4.38989e-09	1.42248e-06	0.0409719	5.11283e-09	2	55920000	56190000	10000
G	17	20020000	20040000	17	20200000	20220000	.	.	.	.	0,255,255	51	18.3721	19.3047	22.9001	22.9085	1.99685e-06	1.42248e-06	0.000589075	0.000596162	2	20030000	20220000	10000
G	17	53060000	53080000	17	53360000	53380000	.	.	.	.	0,255,255	50	20.7526	17.2711	23.9545	21.6353	0.000950898	3.25008e-06	0.00107508	0.00108281	2	53070000	53350000	20000
G	17	29320000	29340000	17	29680000	29700000	.	.	.	.	0,255,255	50	17.4436	17.5847	24.2489	21.9039	4.52919e-06	3.25008e-06	0.00107508	0.00108281	1	29330000	29690000	0
G	17	6560000	6580000	17	6740000	6760000	.	.	.	.	0,255,255	50	25.6219	23.3314	30.047	25.7236	0.0472861	0.000843356	0.0594793	0.0619625	2	6580000	6750000	10000
G	17	64720000	64740000	17	64880000	64900000	.	.	.	.	0,255,255	49	22.1518	19.5149	21.6098	20.9695	0.0016728	7.45621e-06	0.00192536	0.00193903	2	64720000	64890000	10000
G	17	12060000	12080000	17	12560000	12580000	.	.	.	.	0,255,255	49	21.6163	20.5471	23.2888	25.2017	0.0016728	0.00151719	0.00192536	0.0879148	3	12083333	12576666	14908
G	17	8300000	8320000	17	8640000	8660000	.	.	.	.	0,255,255	49	17.7156	14.5587	17.1341	23.1869	1.01876e-05	1.39651e-08	1.3523e-05	0.00193903	3	8310000	8670000	20000
G	17	12080000	12100000	17	12900000	12920000	.	.	.	.	0,255,255	48	7.85205	6.68978	9.7155	10.4779	1.52773e-13	4.54369e-17	1.78616e-13	2.28816e-10	3	12103333	12896666	27487
G	17	2940000	2960000	17	3540000	3560000	.	.	.	.	0,255,255	48	8.86069	7.19128	11.3234	7.9921	1.52773e-13	4.54369e-17	2.0432e-10	1.45103e-13	2	2940000	3550000	10000
G	17	63220000	63240000	17	64160000	64180000	.	.	.	.	0,255,255	47	16.9	10.2917	14.5688	15.6777	4.73116e-05	2.42186e-10	2.92296e-07	6.56083e-05	7	63252857	64164285	45175
G	17	10540000	10560000	17	10740000	10760000	.	.	.	.	0,255,255	47	8.7264	11.1543	14.3675	14.3446	6.37035e-13	2.42186e-10	2.92296e-07	2.82774e-07	2	10540000	10750000	10000
G	17	8900000	8920000	17	9400000	9420000	.	.	.	.	0,255,255	47	12.5693	13.9118	18.4477	18.9812	2.24791e-07	1.04834e-07	6.11853e-05	6.56083e-05	7	8904285	9424285	37142
G	17	75520000	75540000	17	75960000	75980000	.	.	.	.	0,255,255	46	18.6497	16.3341	22.2834	20.3847	9.80026e-05	7.4784e-05	0.00961869	0.00974696	6	75553333	75986666	56764
G	17	63280000	63300000	17	64140000	64160000	.	.	.	.	0,255,255	46	14.6289	12.9396	17.1446	20.1631	5.81933e-07	2.78173e-07	0.000127292	0.00974696	1	63290000	64150000	0
G	17	21020000	21040000	17	21340000	21360000	.	.	.	.	0,255,255	45	12.0978	15.1843	22.9955	17.9575	5.28339e-09	7.21584e-07	0.0157673	0.000268835	1	21030000	21350000	0
G	17	34980000	35000000	17	35560000	35580000	.	.	.	.	0,255,255	44	11.109	10.3504	19.2177	11.6119	1.59107e-08	7.81674e-09	0.000497374	2.39329e-08	5	34982000	35574000	25298
G	17	77040000	77060000	17	77380000	77400000	.	.	.	.	0,255,255	43	17.0103	13.2872	9.47971	19.2093	0.000750272	4.47835e-06	1.94925e-10	0.00101937	2	77070000	77390000	20000
G	17	58200000	58220000	17	58500000	58520000	.	.	.	.	0,255,255	43	17.149	14.1946	14.9089	20.6942	0.000750272	4.47835e-06	1.02928e-05	0.0396147	3	58216666	58516666	14907
G	17	56580000	56600000	17	57080000	57100000	.	.	.	.	0,255,255	42	15.129	12.4208	13.6953	18.1009	1.96447e-05	1.08279e-05	2.47874e-05	0.00192477	3	56610000	57070000	28284
G	17	21000000	21020000	17	21380000	21400000	.	.	.	.	0,255,255	42	9.34705	9.20286	10.8885	14.0798	5.07503e-10	2.19075e-10	1.86581e-07	2.46817e-05	3	21016666	21410000	21082
G	17	32980000	33000000	17	33260000	33280000	.	.	.	.	0,255,255	41	17.7058	16.8121	16.1386	19.0293	0.00261485	0.00224138	0.00332372	0.00353111	1	32990000	33270000	0
G	17	71420000	71440000	17	72160000	72180000	.	.	.	.	0,255,255	40	12.3199	9.56062	13.1417	10.9141	9.87901e-07	2.71963e-09	0.000121738	1.42612e-06	5	71418000	72174000	32249
G	17	13500000	13520000	17	14200000	14220000	.	.	.	.	0,255,255	40	10.8551	9.713	12.514	11.907	9.87901e-07	2.71963e-09	0.000121738	1.42612e-06	1	13510000	14210000	0
G	17	70540000	70560000	17	71180000	71200000	.	.	.	.	0,255,255	39	12.8342	12.3271	13.6544	16.7475	0.000204354	1.56981e-06	0.000261891	0.0109841	1	70550000	71190000	0
G	17	44360000	44380000	17	62900000	62920000	.	.	.	.	0,255,255	38	1.67235	1.05016	0.222962	5.23218	2.06938e-29	2.66198e-34	3.72561e-34	8.12977e-13	4	44360000	62920000	14142
G	17	38760000	38780000	17	39820000	39840000	.	.	.	.	0,255,255	38	15.3182	10.0387	11.0923	18.2209	0.000420835	4.20506e-06	9.39715e-06	0.0186876	1	38770000	39830000	0
G	17	9820000	9840000	17	10500000	10520000	.	.	.	.	0,255,255	38	9.27297	8.49621	10.4283	11.5953	6.44935e-08	3.29852e-08	9.39715e-06	9.62899e-06	5	9850000	10518000	23324
G	17	59040000	59060000	17	59620000	59640000	.	.	.	.	0,255,255	37	9.51998	9.71047	14.2809	10.2125	1.94703e-07	1.04619e-07	0.00111313	2.39628e-05	2	59050000	59640000	10000
G	17	29260000	29280000	17	29700000	29720000	.	.	.	.	0,255,255	35	14.0565	11.9383	11.7728	14.1669	0.00320255	6.73644e-05	0.00012711	0.00441072	1	29270000	29710000	0
G	17	10780000	10800000	17	11880000	11900000	.	.	.	.	0,255,255	34	9.61453	7.30741	8.3795	9.49745	4.92004e-06	3.78865e-08	7.24739e-06	7.55868e-06	2	10790000	11880000	10000
G	17	67520000	67540000	17	68520000	68540000	.	.	.	.	0,255,255	32	8.31672	10.8351	15.5461	14.2727	3.65068e-05	0.000821786	0.0251387	0.0262422	4	67540000	68550000	30000
G	17	74860000	74880000	17	75240000	75260000	.	.	.	.	0,255,255	31	6.14741	7.46049	8.18732	10.5012	3.60497e-08	1.54098e-06	0.000127624	0.00300365	1	74870000	75250000	0
G	17	62820000	62840000	17	62940000	62960000	.	.	.	.	0,255,255	31	13.1252	12.9519	14.3823	14.0146	0.0310843	0.0283413	0.0423602	0.0444217	2	62840000	62950000	10000
G	17	58800000	58820000	17	59640000	59660000	.	.	.	.	0,255,255	31	10.9522	9.4582	13.0219	10.7513	0.00214366	6.68908e-05	0.0423602	0.00300365	3	58796666	59636666	27487
G	17	58780000	58800000	17	59440000	59460000	.	.	.	.	0,255,255	31	10.4258	9.85303	15.451	11.1025	0.00214366	0.0017752	0.0423602	0.00300365	2	58780000	59460000	14142
G	17	34300000	34320000	17	34820000	34840000	.	.	.	.	0,255,255	30	9.29117	6.97303	8.66025	11.8537	0.000226592	4.93173e-06	0.000317014	0.00603059	1	34310000	34830000	0
G	17	32860000	32880000	17	33420000	33440000	.	.	.	.	0,255,255	30	7.34642	8.80098	8.86032	12.1284	7.03825e-06	0.000170239	0.000317014	0.00603059	1	32870000	33430000	0
G	17	43640000	43660000	17	44560000	44580000	.	.	.	.	0,255,255	28	1.73803	3.78915	4.64414	5.61044	1.0092e-17	1.93565e-10	2.58788e-08	2.42845e-06	1	43650000	44570000	0
G	17	13220000	13240000	17	14820000	14840000	.	.	.	.	0,255,255	28	6.7206	7.84921	9.09062	8.35235	5.93932e-05	0.000978643	0.00163764	0.00179869	1	13230000	14830000	0
G	17	32740000	32760000	17	33440000	33460000	.	.	.	.	0,255,255	27	8.45696	8.28332	9.87355	11.6583	0.00262357	0.00223305	0.0359919	0.0387801	2	32750000	33440000	10000
G	17	63240000	63260000	17	64660000	64680000	.	.	.	.	0,255,255	26	4.40688	4.64711	6.82835	5.74643	3.57045e-07	4.16469e-07	0.000582106	3.16836e-05	1	63250000	64670000	0
G	17	47580000	47600000	17	48040000	48060000	.	.	.	.	0,255,255	26	9.12476	8.53276	7.57826	9.51777	0.00542429	0.00501712	0.000582106	0.00791229	1	47590000	48050000	0
G	17	58200000	58220000	17	58700000	58720000	.	.	.	.	0,255,255	22	8.37	6.58732	9.01552	8.77533	0.0615486	0.0114732	0.0883639	0.0933928	2	58200000	58710000	10000
G	17	68800000	68820000	17	70520000	70540000	.	.	.	.	0,255,255	20	4.31964	4.52402	5.10601	7.44304	0.000932541	0.00114941	0.0123502	0.0606405	2	68790000	70530000	20000
G	17	34300000	34320000	17	36300000	36320000	.	.	.	.	0,255,255	20	3.74383	4.81513	4.09838	7.20238	7.10636e-05	0.00114941	0.00157949	0.0606405	2	34300000	36310000	10000
G	17	6940000	6960000	17	7480000	7500000	.	.	.	.	0,255,255	18	4.60789	3.6315	5.32975	3.81052	0.00669715	0.00127981	0.0515717	0.00182051	2	6950000	7470000	20000
G	17	44560000	44580000	17	62900000	62920000	.	.	.	.	0,255,255	17	1.43587	0.880672	0.242062	2.75518	5.6987e-08	3.53403e-07	2.89058e-07	0.000596267	1	44570000	62910000	0
G	17	5140000	5160000	17	6340000	6360000	.	.	.	.	0,255,255	17	1.84728	2.65502	2.75441	4.73596	9.77378e-07	0.000509769	0.000610879	0.0284139	2	5150000	6340000	10000
G	17	15540000	15560000	17	18620000	18640000	.	.	.	.	0,255,255	16	3.46271	1.86558	0.923006	2.3732	0.00744388	2.19388e-05	3.2089e-06	0.000209735	2	15540000	18630000	10000
G	17	43660000	43680000	17	62900000	62920000	.	.	.	.	0,255,255	15	0.312392	0.612823	0.215301	1.95402	5.78928e-06	3.85072e-05	3.26231e-05	0.000118585	2	43660000	62910000	10000
G	17	15720000	15740000	17	20540000	20560000	.	.	.	.	0,255,255	14	0.582927	1.09187	1.7301	0.709477	5.96289e-05	0.000363018	0.000678132	0.000407866	2	15740000	20560000	14142
G	17	15660000	15680000	17	20480000	20500000	.	.	.	.	0,255,255	14	0.370419	0.555663	0.502416	0.67931	5.96289e-05	0.000363018	0.000309322	0.000407866	1	15670000	20490000	0
G	17	15420000	15440000	17	18720000	18740000	.	.	.	.	0,255,255	14	3.04728	1.13731	0.767692	0.692652	0.0102987	0.000363018	0.000309322	0.000407866	1	15430000	18730000	0
G	18	56440000	56460000	18	56720000	56740000	.	.	.	.	0,255,255	132	34.3925	25.5995	35.6825	35.7848	4.96311e-26	1.91045e-35	3.91832e-26	1.17988e-25	6	56446666	56733333	23571
G	18	52340000	52360000	18	52640000	52660000	.	.	.	.	0,255,255	111	21.5914	19.1462	24.4179	25.2812	2.27884e-31	3.91446e-40	3.53255e-31	9.74103e-24	4	52345000	52655000	25495
G	18	56180000	56200000	18	56420000	56440000	.	.	.	.	0,255,255	110	43.1843	28.7827	33.4589	28.2227	9.27774e-11	1.62484e-23	1.69426e-16	2.65381e-23	7	56198571	56407142	38118
G	18	43260000	43280000	18	43420000	43440000	.	.	.	.	0,255,255	106	36.2357	29.8933	35.0897	33.2698	9.08784e-15	1.72338e-21	7.58641e-15	1.08023e-14	7	43287142	43424285	30905
G	18	20700000	20720000	18	20940000	20960000	.	.	.	.	0,255,255	106	27.3289	30.105	32.969	43.0795	3.2928e-21	1.72338e-21	7.58641e-15	2.60672e-09	3	20710000	20970000	20000
G	18	67860000	67880000	18	68100000	68120000	.	.	.	.	0,255,255	103	27.9875	22.2479	23.7009	35.1315	1.00301e-19	6.38052e-27	9.28677e-27	1.19233e-13	4	67855000	68105000	25495
G	18	3280000	3300000	18	3660000	3680000	.	.	.	.	0,255,255	103	20.7389	16.733	29.3463	22.6793	1.10601e-26	1.29972e-34	8.91264e-20	1.84912e-26	7	3281428	3638571	33442
G	18	12380000	12400000	18	12660000	12680000	.	.	.	.	0,255,255	96	25.9945	18.3972	21.85	26.1531	1.50496e-16	5.28769e-30	8.91075e-23	1.37279e-16	5	12398000	12666000	25298
G	18	55860000	55880000	18	55980000	56000000	.	.	.	.	0,255,255	92	40.4674	40.2964	37.4391	52.8065	7.27053e-06	1.07067e-05	7.80263e-10	0.0152057	2	55860000	55990000	10000
G	18	22180000	22200000	18	22300000	22320000	.	.	.	.	0,255,255	91	44.4948	41.1027	44.3847	48.8087	1.21658e-05	1.77783e-05	2.26677e-05	2.08938e-05	2	22190000	22300000	10000
G	18	12740000	12760000	18	12900000	12920000	.	.	.	.	0,255,255	91	39.8684	36.1634	39.4553	39.5421	1.21658e-05	1.24945e-09	2.26677e-05	2.08938e-05	8	12732500	12917500	35532
G	18	61400000	61420000	18	61500000	61520000	.	.	.	.	0,255,255	90	39.6484	32.2642	37.0827	35.355	2.02993e-05	2.61883e-09	3.56767e-09	3.92367e-09	1	61410000	61510000	0
G	18	3280000	3300000	18	3440000	3460000	.	.	.	.	0,255,255	87	40.0737	31.201	43.8503	31.8533	8.65078e-05	2.25838e-08	0.000162833	3.36668e-08	3	3296666	3436666	14907
G	18	3260000	3280000	18	3580000	3600000	.	.	.	.	0,255,255	86	20.0764	19.029	34.9049	18.8519	1.49629e-17	8.62745e-24	6.16081e-08	4.44551e-23	3	3290000	3590000	20000
G	18	32580000	32600000	18	32720000	32740000	.	.	.	.	0,255,255	83	28.325	27.2885	32.7051	34.6226	3.16502e-11	1.93816e-11	4.71975e-07	5.07845e-07	1	32590000	32730000	0
G	18	8700000	8720000	18	8980000	9000000	.	.	.	.	0,255,255	83	28.6849	27.6268	28.0234	37.0183	3.16502e-11	1.93816e-11	2.95303e-11	5.07845e-07	14	8674285	9012857	58293
G	18	60780000	60800000	18	60980000	61000000	.	.	.	.	0,255,255	81	31.1066	26.0629	26.9477	31.1067	1.49025e-06	1.10895e-10	1.69838e-10	1.78301e-06	2	60800000	60990000	10000
G	18	57280000	57300000	18	57480000	57500000	.	.	.	.	0,255,255	81	33.1627	31.1491	33.4329	42.9419	1.49025e-06	1.26122e-06	1.70907e-06	0.0022373	1	57290000	57490000	0
G	18	20600000	20620000	18	20960000	20980000	.	.	.	.	0,255,255	80	22.3337	19.3416	21.2165	33.7244	1.0387e-14	2.73846e-20	1.09469e-14	3.3723e-06	4	20605000	20975000	25495
G	18	52760000	52780000	18	52880000	52900000	.	.	.	.	0,255,255	79	43.4413	37.3061	42.8851	33.7419	0.00287589	4.39614e-06	0.00535045	6.24902e-06	1	52770000	52890000	0
G	18	46000000	46020000	18	46160000	46180000	.	.	.	.	0,255,255	77	30.4694	23.7458	25.5756	34.7286	4.98983e-09	1.40247e-13	4.72142e-09	1.96351e-05	3	46003333	46170000	24037
G	18	32800000	32820000	18	32920000	32940000	.	.	.	.	0,255,255	77	37.0126	27.6498	29.5153	32.6687	1.59843e-05	3.20132e-09	4.72142e-09	1.96351e-05	1	32810000	32930000	0
G	18	43520000	43540000	18	43640000	43660000	.	.	.	.	0,255,255	76	42.4025	36.2629	26.139	48.731	0.00883762	2.55369e-05	1.05105e-08	0.0156074	4	43505000	43660000	36401
G	18	59260000	59280000	18	59780000	59800000	.	.	.	.	0,255,255	75	19.619	18.0577	26.0501	25.3487	1.80155e-12	1.47122e-17	2.28366e-08	2.62619e-08	8	59267500	59792500	42573
G	18	9960000	9980000	18	10520000	10540000	.	.	.	.	0,255,255	75	27.0703	15.0311	19.5575	18.9069	2.33694e-08	1.16502e-22	5.41244e-17	5.44791e-17	11	9995454	10500909	38655
G	18	18780000	18800000	18	19020000	19040000	.	.	.	.	0,255,255	72	37.0354	31.6137	41.1485	36.833	0.000252126	0.000235062	0.0598708	0.000317573	3	18783333	19023333	14907
G	18	74100000	74120000	18	74400000	74420000	.	.	.	.	0,255,255	71	20.2539	14.5289	17.8963	19.0399	8.43544e-11	2.98864e-20	5.71235e-15	6.09826e-15	7	74118571	74412857	31559
G	18	61180000	61200000	18	61400000	61420000	.	.	.	.	0,255,255	70	25.6542	26.9731	34.0966	30.6014	9.75859e-07	6.80942e-07	0.000872603	1.07425e-06	3	61190000	61410000	20000
G	18	720000	740000	18	820000	840000	.	.	.	.	0,255,255	70	30.2488	21.5817	24.1642	28.601	9.75859e-07	1.43986e-10	2.31133e-10	1.07425e-06	1	730000	830000	0
G	18	23980000	24000000	18	24220000	24240000	.	.	.	.	0,255,255	68	22.457	25.3031	34.7614	27.0546	1.30827e-09	2.77938e-06	0.00227662	4.27063e-06	2	23990000	24220000	10000
G	18	60380000	60400000	18	60620000	60640000	.	.	.	.	0,255,255	67	21.948	20.0529	18.3635	26.407	3.23989e-09	2.24195e-09	5.4489e-13	8.29098e-06	2	60400000	60630000	10000
G	18	6520000	6540000	18	6880000	6900000	.	.	.	.	0,255,255	67	20.64	17.1761	21.8413	22.8439	3.23989e-09	1.85887e-13	3.33101e-09	3.52464e-09	7	6544285	6887142	34404
G	18	2920000	2940000	18	3240000	3260000	.	.	.	.	0,255,255	67	22.5607	16.837	23.5271	20.221	3.23989e-09	1.85887e-13	3.33101e-09	3.52464e-09	5	2938000	3234000	25298
G	18	61180000	61200000	18	61500000	61520000	.	.	.	.	0,255,255	66	21.7292	20.7246	27.9324	26.5013	7.77681e-09	5.61576e-09	1.50762e-05	1.61461e-05	4	61205000	61510000	45000
G	18	57120000	57140000	18	57480000	57500000	.	.	.	.	0,255,255	66	19.8736	17.0608	24.256	23.3817	7.77681e-09	5.53564e-13	8.13161e-09	8.5386e-09	2	57120000	57480000	14142
G	18	71860000	71880000	18	71960000	71980000	.	.	.	.	0,255,255	65	35.7423	29.9228	33.0402	34.0894	0.00621962	2.04135e-05	0.00852735	0.00829007	4	71875000	71990000	20616
G	18	71840000	71860000	18	72000000	72020000	.	.	.	.	0,255,255	65	25.717	21.8364	27.5297	27.53	2.79503e-05	1.32405e-08	2.90589e-05	3.06207e-05	1	71850000	72010000	0
G	18	59240000	59260000	18	59560000	59580000	.	.	.	.	0,255,255	64	26.0553	24.2922	33.2757	26.9649	5.18273e-05	3.04283e-08	0.0128088	5.7447e-05	4	59260000	59570000	30000
G	18	47020000	47040000	18	47360000	47380000	.	.	.	.	0,255,255	64	21.372	16.2542	20.3343	19.8427	4.21573e-08	4.99846e-12	4.47354e-08	4.63115e-08	6	47050000	47376666	50771
G	18	32240000	32260000	18	32340000	32360000	.	.	.	.	0,255,255	64	29.9082	32.1645	33.9683	32.8966	5.18273e-05	0.00966028	0.0128088	0.0125312	3	32243333	32363333	14907
G	18	3440000	3460000	18	3660000	3680000	.	.	.	.	0,255,255	63	27.6967	25.1649	36.1585	29.2307	9.47612e-05	7.2824e-05	0.018852	0.000105485	2	3450000	3660000	10000
G	18	56960000	56980000	18	57080000	57100000	.	.	.	.	0,255,255	62	31.1853	30.0134	29.67	32.3422	0.0197795	0.000131809	0.000181994	0.0269583	4	56950000	57080000	22361
G	18	72960000	72980000	18	73180000	73200000	.	.	.	.	0,255,255	61	19.8807	20.2291	19.1699	20.1761	4.82819e-07	3.62896e-07	2.71741e-10	5.40841e-07	4	72950000	73185000	20616
G	18	45280000	45300000	18	45540000	45560000	.	.	.	.	0,255,255	60	21.162	16.3251	18.9637	16.7604	1.04208e-06	3.2714e-10	7.35535e-10	7.90699e-10	5	45302000	45546000	25298
G	18	33660000	33680000	18	33860000	33880000	.	.	.	.	0,255,255	60	26.1787	24.9269	26.1956	33.3536	0.000530416	0.000422253	0.00056884	0.0551174	3	33690000	33870000	20000
G	18	21180000	21200000	18	21380000	21400000	.	.	.	.	0,255,255	60	19.4773	22.1496	26.1529	28.6131	5.489e-10	8.05338e-07	0.00056884	0.000602577	2	21200000	21390000	10000
G	18	58980000	59000000	18	59160000	59180000	.	.	.	.	0,255,255	59	21.6972	18.2403	21.4024	20.6809	2.22887e-06	8.82483e-10	2.48327e-06	2.50733e-06	3	58996666	59163333	14908
G	18	43240000	43260000	18	43460000	43480000	.	.	.	.	0,255,255	59	30.6552	22.8825	27.3718	18.7556	0.00089721	1.761e-06	0.000979146	2.16455e-09	1	43250000	43470000	0
G	18	11360000	11380000	18	11480000	11500000	.	.	.	.	0,255,255	59	26.8574	33.4715	28.6479	37.5515	0.00089721	0.059601	0.000979146	0.0759507	2	11360000	11500000	14142
G	18	10840000	10860000	18	11140000	11160000	.	.	.	.	0,255,255	58	16.5852	17.5095	23.8098	16.6201	3.85443e-09	2.36574e-09	5.22829e-06	5.79592e-09	1	10850000	11150000	0
G	18	21080000	21100000	18	21280000	21300000	.	.	.	.	0,255,255	57	21.0382	20.886	27.1842	22.4318	9.96121e-06	7.84837e-06	0.00278029	1.10332e-05	1	21090000	21290000	0
G	18	10000000	10020000	18	10440000	10460000	.	.	.	.	0,255,255	57	18.3373	17.1468	23.8033	21.849	9.85539e-09	6.28171e-09	1.08947e-05	1.10332e-05	1	10010000	10450000	0
G	18	5900000	5920000	18	6200000	6220000	.	.	.	.	0,255,255	56	15.0724	17.2401	23.6263	20.0762	1.88133e-11	1.63668e-08	2.24859e-05	2.22721e-05	4	5890000	6210000	20000
G	18	20380000	20400000	18	20560000	20580000	.	.	.	.	0,255,255	55	27.5725	21.5332	23.799	22.7636	0.00626236	3.28787e-05	4.51669e-05	4.50358e-05	1	20390000	20570000	0
G	18	60680000	60700000	18	60980000	61000000	.	.	.	.	0,255,255	54	19.7857	15.9003	17.8988	24.5577	8.1495e-05	1.04202e-07	2.05308e-07	8.85175e-05	1	60690000	60990000	0
G	18	55540000	55560000	18	55780000	55800000	.	.	.	.	0,255,255	54	18.1718	18.2147	22.429	21.7438	1.51756e-07	1.04202e-07	8.99009e-05	8.85175e-05	3	55550000	55790000	20000
G	18	34940000	34960000	18	35060000	35080000	.	.	.	.	0,255,255	54	23.4647	24.318	29.8526	20.8243	8.1495e-05	6.58375e-05	0.0115529	8.85175e-05	1	34950000	35070000	0
G	18	9720000	9740000	18	9940000	9960000	.	.	.	.	0,255,255	54	23.4252	20.4095	22.7668	25.3926	8.1495e-05	6.58375e-05	8.99009e-05	0.012299	3	9710000	9950000	20000
G	18	64880000	64900000	18	65180000	65200000	.	.	.	.	0,255,255	53	22.9268	18.7889	27.2018	15.2117	0.000153399	2.53183e-07	0.0180269	6.11694e-10	1	64890000	65190000	0
G	18	74700000	74720000	18	74920000	74940000	.	.	.	.	0,255,255	52	17.3846	15.1529	17.5386	16.08	8.70981e-07	5.97038e-10	1.19294e-06	1.27687e-06	3	74723333	74916666	29815
G	18	54400000	54420000	18	55220000	55240000	.	.	.	.	0,255,255	52	15.589	9.46385	13.3249	14.0435	8.70981e-07	1.3805e-16	2.06454e-09	1.83257e-09	5	54426000	55214000	33941
G	18	60080000	60100000	18	60240000	60260000	.	.	.	.	0,255,255	51	19.2314	19.0882	20.4033	20.0463	1.99685e-06	1.42248e-06	0.000589075	0.000596162	1	60090000	60250000	0
G	18	19740000	19760000	18	20120000	20140000	.	.	.	.	0,255,255	51	14.2099	15.9693	20.1135	20.6395	4.38989e-09	1.42248e-06	0.000589075	0.000596162	2	19750000	20140000	10000
G	18	29720000	29740000	18	30120000	30140000	.	.	.	.	0,255,255	50	14.6766	12.0161	12.672	15.6803	1.17599e-08	6.22024e-12	1.58062e-08	6.46841e-06	3	29750000	30130000	20000
G	18	23220000	23240000	18	23400000	23420000	.	.	.	.	0,255,255	50	22.1549	25.7366	22.1525	30.5317	0.000950898	0.0462031	0.00107508	0.0619625	2	23250000	23410000	20000
G	18	3700000	3720000	18	3860000	3880000	.	.	.	.	0,255,255	50	22.6168	22.1742	25.3249	27.0743	0.000950898	0.000843356	0.0594793	0.0619625	2	3710000	3880000	10000
G	18	64880000	64900000	18	66320000	66340000	.	.	.	.	0,255,255	49	11.9914	9.58144	14.6218	11.7579	5.73456e-11	1.33127e-14	4.236e-08	7.14517e-11	4	64890000	66320000	30000
G	18	23880000	23900000	18	24220000	24240000	.	.	.	.	0,255,255	49	18.2402	17.1666	18.379	22.4602	1.01876e-05	7.45621e-06	1.3523e-05	0.00193903	1	23890000	24230000	0
G	18	3760000	3780000	18	3980000	4000000	.	.	.	.	0,255,255	49	15.9004	17.3302	20.0643	23.8006	1.01876e-05	7.45621e-06	0.00192536	0.00193903	3	3763333	3996666	14908
G	18	77140000	77160000	18	77280000	77300000	.	.	.	.	0,255,255	48	18.5194	15.1286	20.2391	14.0951	2.20925e-05	3.8396e-08	0.00334899	1.07259e-07	1	77150000	77290000	0
G	18	60240000	60260000	18	60640000	60660000	.	.	.	.	0,255,255	48	12.3442	10.7261	10.2538	19.87	1.68646e-10	7.27803e-11	2.0432e-10	0.0033844	1	60250000	60650000	0
G	18	53000000	53020000	18	53440000	53460000	.	.	.	.	0,255,255	48	11.5902	13.6733	15.3218	18.1776	1.68646e-10	3.8396e-08	1.10766e-07	3.09954e-05	2	53030000	53450000	20000
G	18	10840000	10860000	18	11560000	11580000	.	.	.	.	0,255,255	48	13.1361	13.7876	16.3741	21.1002	8.40834e-08	3.8396e-08	2.86589e-05	0.0033844	2	10850000	11560000	10000
G	18	45540000	45560000	18	45960000	45980000	.	.	.	.	0,255,255	47	17.6069	12.9979	14.8223	15.117	4.73116e-05	1.04834e-07	2.92296e-07	2.82774e-07	2	45560000	45970000	10000
G	18	72900000	72920000	18	73180000	73200000	.	.	.	.	0,255,255	46	19.1481	19.8586	19.4489	24.0304	9.80026e-05	0.0076929	0.000127292	0.00974696	1	72910000	73190000	0
G	18	43720000	43740000	18	44060000	44080000	.	.	.	.	0,255,255	46	13.14	12.2878	21.1629	13.4321	5.81933e-07	8.14754e-10	0.00961869	7.29688e-07	2	43730000	44060000	10000
G	18	51220000	51240000	18	51640000	51660000	.	.	.	.	0,255,255	45	12.8496	12.0375	15.1923	15.2288	1.46906e-06	2.54159e-09	1.85669e-06	1.78501e-06	2	51220000	51640000	14142
G	18	44720000	44740000	18	45260000	45280000	.	.	.	.	0,255,255	45	11.5954	10.6808	9.46667	16.6439	5.28339e-09	2.54159e-09	1.26546e-11	0.000268835	3	44750000	45270000	20000
G	18	43720000	43740000	18	44220000	44240000	.	.	.	.	0,255,255	45	12.7624	10.2548	17.1787	14.6408	1.46906e-06	2.54159e-09	0.000252743	1.78501e-06	3	43716666	44236666	27487
G	18	32960000	32980000	18	33300000	33320000	.	.	.	.	0,255,255	45	18.6792	17.6506	23.352	17.4467	0.000197235	0.000152855	0.0157673	0.000268835	1	32970000	33310000	0
G	18	21440000	21460000	18	21680000	21700000	.	.	.	.	0,255,255	45	20.4182	17.0729	18.0058	20.4412	0.0127874	0.000152855	0.000252743	0.0160173	2	21440000	21690000	10000
G	18	13220000	13240000	18	13520000	13540000	.	.	.	.	0,255,255	45	15.2599	16.3726	21.0822	18.4579	1.46906e-06	0.000152855	0.0157673	0.000268835	2	13240000	13520000	14142
G	18	57660000	57680000	18	58220000	58240000	.	.	.	.	0,255,255	44	12.1072	10.9586	14.464	14.1604	1.59107e-08	7.81674e-09	4.41725e-06	4.39815e-06	5	57666000	58214000	33941
G	18	41220000	41240000	18	41620000	41640000	.	.	.	.	0,255,255	44	13.2888	12.786	18.2519	14.1789	3.55615e-06	1.82292e-06	0.000497374	4.39815e-06	3	41223333	41636666	14908
G	18	620000	640000	18	820000	840000	.	.	.	.	0,255,255	44	17.5825	11.9419	12.1116	17.0883	0.000390762	7.81674e-09	2.2429e-08	0.00053038	2	630000	820000	10000
G	18	32440000	32460000	18	32720000	32740000	.	.	.	.	0,255,255	42	12.8677	11.9224	11.055	17.5808	1.96447e-05	7.03452e-08	1.86581e-07	0.00192477	1	32450000	32730000	0
G	18	9060000	9080000	18	9520000	9540000	.	.	.	.	0,255,255	42	15.9383	12.2792	13.9017	19.2173	0.00142013	7.03452e-08	2.47874e-05	0.00192477	1	9070000	9530000	0
G	18	6920000	6940000	18	7160000	7180000	.	.	.	.	0,255,255	42	13.1859	11.2641	12.7293	16.959	1.96447e-05	7.03452e-08	2.47874e-05	0.00192477	1	6930000	7170000	0
G	18	11720000	11740000	18	12040000	12060000	.	.	.	.	0,255,255	40	11.0381	12.2676	15.334	14.8775	9.87901e-07	5.72177e-07	0.000121738	0.000124889	2	11730000	12040000	10000
G	18	2220000	2240000	18	2540000	2560000	.	.	.	.	0,255,255	40	14.7791	12.6066	11.1898	19.0706	9.61479e-05	5.92051e-05	1.43334e-06	0.006275	1	2230000	2550000	0
G	18	65120000	65140000	18	66320000	66340000	.	.	.	.	0,255,255	39	11.8385	10.4936	9.88584	14.7729	2.67194e-06	1.56981e-06	3.75931e-06	0.000269024	2	65150000	66330000	20000
G	18	54400000	54420000	18	55100000	55120000	.	.	.	.	0,255,255	39	11.3075	10.9922	17.6278	11.5177	2.67194e-06	1.56981e-06	0.0106154	3.76439e-06	2	54420000	55110000	10000
G	18	39280000	39300000	18	39400000	39420000	.	.	.	.	0,255,255	39	14.3761	15.867	16.5029	15.4529	0.000204354	0.00727059	0.0106154	0.000269024	1	39290000	39410000	0
G	18	66520000	66540000	18	67140000	67160000	.	.	.	.	0,255,255	38	13.11	12.4615	16.7777	13.4751	0.000420835	0.000288967	0.0181262	0.000568928	1	66530000	67150000	0
G	18	46200000	46220000	18	46760000	46780000	.	.	.	.	0,255,255	38	14.7676	13.8163	19.2606	16.2407	0.000420835	0.000288967	0.0181262	0.0186876	2	46210000	46760000	10000
G	18	56180000	56200000	18	56720000	56740000	.	.	.	.	0,255,255	37	10.5888	10.3928	13.4838	13.7782	1.7205e-05	1.08263e-05	0.00111313	0.0011733	2	56190000	56740000	10000
G	18	5860000	5880000	18	6500000	6520000	.	.	.	.	0,255,255	37	9.52014	9.33037	13.0458	10.5698	1.94703e-07	1.04619e-07	0.00111313	2.39628e-05	2	5880000	6500000	14142
G	18	2100000	2120000	18	2540000	2560000	.	.	.	.	0,255,255	37	10.8664	8.05452	9.35835	13.8778	1.7205e-05	1.04619e-07	2.97088e-07	0.0011733	1	2110000	2550000	0
G	18	23100000	23120000	18	23460000	23480000	.	.	.	.	0,255,255	36	16.1621	15.3924	15.207	18.1604	0.0360113	0.00125565	0.00221696	0.049841	2	23130000	23470000	20000
G	18	77140000	77160000	18	77400000	77420000	.	.	.	.	0,255,255	35	10.8572	9.22301	16.457	10.6651	9.7188e-05	1.02384e-06	0.0757675	0.00014012	2	77140000	77400000	14142
G	18	66500000	66520000	18	67740000	67760000	.	.	.	.	0,255,255	34	8.27697	7.81075	9.54969	12.7645	4.92004e-06	3.78865e-08	7.24739e-06	0.00826397	1	66510000	67750000	0
G	18	51920000	51940000	18	52320000	52340000	.	.	.	.	0,255,255	34	9.07927	7.57705	9.45956	10.907	4.92004e-06	3.78865e-08	7.24739e-06	0.000313899	2	51940000	52330000	10000
G	18	66560000	66580000	18	67720000	67740000	.	.	.	.	0,255,255	33	7.10284	9.01108	8.5466	12.0098	1.97168e-07	8.7976e-06	1.8901e-05	0.000681913	1	66570000	67730000	0
G	18	32960000	32980000	18	33520000	33540000	.	.	.	.	0,255,255	33	11.9619	9.45659	11.6871	12.4836	0.000488567	8.7976e-06	0.000641389	0.0149253	3	32976666	33536666	14907
G	18	71860000	71880000	18	72160000	72180000	.	.	.	.	0,255,255	32	9.04358	10.6024	15.1916	13.2784	3.65068e-05	0.000821786	0.0251387	0.0262422	2	71880000	72180000	14142
G	18	19500000	19520000	18	20160000	20180000	.	.	.	.	0,255,255	31	10.1924	11.6839	13.8239	13.7627	0.00214366	0.0017752	0.0423602	0.0444217	4	19495000	20155000	25495
G	18	1580000	1600000	18	2220000	2240000	.	.	.	.	0,255,255	30	9.4311	9.64293	11.7816	9.62519	0.000226592	0.000170239	0.00563215	0.000340333	1	1590000	2230000	0
G	18	840000	860000	18	2560000	2580000	.	.	.	.	0,255,255	30	8.4643	7.45252	8.56164	9.74242	0.000226592	4.93173e-06	0.000317014	0.000340333	4	860000	2545000	33541
G	18	46200000	46220000	18	46960000	46980000	.	.	.	.	0,255,255	29	8.65526	6.6117	7.42341	10.6327	0.000537055	1.49159e-05	2.7827e-05	0.0116507	1	46210000	46970000	0
G	18	10540000	10560000	18	11120000	11140000	.	.	.	.	0,255,255	29	11.307	8.64042	11.3382	8.38965	0.00800599	0.000414028	0.0108805	0.00080033	2	10550000	11140000	10000
G	18	5880000	5900000	18	6880000	6900000	.	.	.	.	0,255,255	27	6.54544	7.35252	9.09661	8.70975	0.000162787	0.000129915	0.00356938	0.00380603	2	5880000	6890000	10000
G	18	72960000	72980000	18	74060000	74080000	.	.	.	.	0,255,255	26	8.8444	8.93816	9.21331	10.7489	0.00542429	0.00501712	0.00754183	0.0666669	3	72956666	74076666	14907
G	18	51940000	51960000	18	52640000	52660000	.	.	.	.	0,255,255	26	3.89196	5.88636	9.63063	7.54981	4.79219e-09	1.67028e-05	0.00754183	0.000579433	1	51950000	52650000	0
G	18	49180000	49200000	18	50200000	50220000	.	.	.	.	0,255,255	25	5.75577	6.67926	7.72942	7.69438	6.17391e-05	0.000907121	0.00148692	0.00146635	1	49190000	50210000	0
G	18	12400000	12420000	18	12920000	12940000	.	.	.	.	0,255,255	24	5.45342	6.37856	8.0485	6.75305	0.000174253	0.00218627	0.0280145	0.00338776	3	12396666	12943333	27487
G	18	10560000	10580000	18	11560000	11580000	.	.	.	.	0,255,255	24	6.1356	4.8804	6.65899	6.75145	0.000174253	7.26447e-06	0.00347037	0.00338776	2	10570000	11560000	10000
G	18	1080000	1100000	18	1620000	1640000	.	.	.	.	0,255,255	24	5.36524	5.74615	6.14364	5.2372	0.000174253	0.000168501	0.000272765	0.000284893	1	1090000	1630000	0
G	18	4100000	4120000	18	5060000	5080000	.	.	.	.	0,255,255	22	7.51102	5.93196	7.9226	6.64454	0.0112478	0.0014252	0.0883639	0.0161887	2	4110000	5050000	20000
G	18	1580000	1600000	18	2540000	2560000	.	.	.	.	0,255,255	22	5.00954	4.02936	5.19943	6.78309	0.00129633	0.000102725	0.002058	0.0161887	1	1590000	2550000	0
G	18	33320000	33340000	18	33860000	33880000	.	.	.	.	0,255,255	19	2.63295	3.80713	4.49237	5.06662	1.07181e-05	0.000340114	0.00430491	0.0265225	2	33330000	33850000	20000
G	19	2640000	2660000	19	2740000	2760000	.	.	.	.	0,255,255	120	49.7596	37.2963	46.7781	40.7004	1.23359e-08	1.0615e-20	1.07244e-13	8.49508e-14	2	2650000	2760000	10000
G	19	47640000	47660000	19	47740000	47760000	.	.	.	.	0,255,255	115	57.7807	39.7836	46.7975	53.9539	1.83636e-07	2.46899e-12	4.01308e-12	6.36053e-07	1	47650000	47750000	0
G	19	47340000	47360000	19	47480000	47500000	.	.	.	.	0,255,255	115	47.9067	40.3121	37.6051	52.7147	2.52883e-12	2.46899e-12	1.62677e-18	6.36053e-07	4	47370000	47485000	20616
G	19	13700000	13720000	19	13820000	13840000	.	.	.	.	0,255,255	114	49.9787	38.999	41.4153	42.2828	3.07712e-07	5.25151e-12	8.33254e-12	7.87549e-12	2	13720000	13830000	10000
G	19	10380000	10400000	19	10480000	10500000	.	.	.	.	0,255,255	114	55.1234	39.7077	51.1821	50.5727	3.07712e-07	5.25151e-12	1.01483e-06	1.01879e-06	4	10380000	10500000	14142
G	19	14300000	14320000	19	14440000	14460000	.	.	.	.	0,255,255	110	49.6606	46.5608	52.2281	55.4888	2.49306e-06	9.90823e-11	7.58963e-06	7.5088e-06	5	14286000	14478000	48166
G	19	47940000	47960000	19	48200000	48220000	.	.	.	.	0,255,255	109	33.7798	26.7055	30.2812	32.6527	5.55805e-16	5.01568e-23	1.2444e-22	6.60658e-16	8	47947500	48195000	39131
G	19	2460000	2480000	19	2600000	2620000	.	.	.	.	0,255,255	109	46.0846	37.9782	47.9941	46.7119	1.93209e-10	3.55856e-16	3.21211e-10	3.29054e-10	5	2474000	2598000	32249
G	19	3320000	3340000	19	3480000	3500000	.	.	.	.	0,255,255	104	47.0667	35.6117	51.1643	32.2754	6.11408e-09	3.2898e-14	0.000130352	5.54599e-14	7	3330000	3470000	28284
G	19	19640000	19660000	19	19740000	19760000	.	.	.	.	0,255,255	102	32.7379	20.5627	25.323	27.1048	2.40622e-13	2.11492e-26	2.31884e-19	2.36596e-19	1	19650000	19750000	0
G	19	16340000	16360000	19	16480000	16500000	.	.	.	.	0,255,255	102	32.9807	25.3646	32.7989	22.2032	2.40622e-13	1.25965e-19	2.45649e-13	5.47069e-26	6	16356666	16493333	26874
G	19	46580000	46600000	19	46760000	46780000	.	.	.	.	0,255,255	100	37.5863	36.1181	45.8612	39.6086	1.21908e-12	9.84283e-13	1.36433e-07	1.42736e-07	1	46590000	46770000	0
G	19	38720000	38740000	19	38820000	38840000	.	.	.	.	0,255,255	100	51.3773	38.1647	50.7901	44.1274	0.000276692	9.84283e-13	0.000741662	1.42736e-07	1	38730000	38830000	0
G	19	13080000	13100000	19	13200000	13220000	.	.	.	.	0,255,255	100	39.1033	32.6704	43.7625	32.8982	7.75164e-08	9.84283e-13	1.36433e-07	1.34961e-12	3	13096666	13203333	14908
G	19	13980000	14000000	19	14180000	14200000	.	.	.	.	0,255,255	99	40.9418	32.3527	36.0094	38.3578	1.36224e-07	2.2037e-12	2.9516e-12	3.06842e-12	4	14000000	14190000	22361
G	19	17180000	17200000	19	17280000	17300000	.	.	.	.	0,255,255	96	52.4238	37.5128	49.4203	40.2148	0.00126175	2.4666e-11	0.0032502	1.39195e-06	1	17190000	17290000	0
G	19	46900000	46920000	19	47000000	47020000	.	.	.	.	0,255,255	95	46.6649	37.721	48.7974	39.3661	1.42994e-06	5.48368e-11	2.57362e-06	2.4455e-06	1	46910000	47010000	0
G	19	48460000	48480000	19	48580000	48600000	.	.	.	.	0,255,255	87	41.8579	41.1921	55.3781	44.1581	8.65078e-05	0.000131708	0.0597105	0.000152161	3	48470000	48616666	33334
G	19	19460000	19480000	19	19580000	19600000	.	.	.	.	0,255,255	87	39.7398	30.7485	24.5435	43.4285	8.65078e-05	5.22644e-13	5.25845e-18	0.000152161	4	19490000	19600000	22361
G	19	3320000	3340000	19	3420000	3440000	.	.	.	.	0,255,255	87	42.1529	41.6573	48.771	45.4803	8.65078e-05	0.000131708	0.000162833	0.000152161	1	3330000	3430000	0
G	19	45060000	45080000	19	45160000	45180000	.	.	.	.	0,255,255	86	37.7647	32.0596	31.1796	36.3627	5.49521e-08	4.42724e-08	6.16081e-08	6.6643e-08	1	45070000	45170000	0
G	19	42940000	42960000	19	43040000	43060000	.	.	.	.	0,255,255	86	43.3493	33.2727	41.2511	35.1848	0.000136216	4.42724e-08	0.000254854	6.6643e-08	1	42950000	43050000	0
G	19	47780000	47800000	19	47880000	47900000	.	.	.	.	0,255,255	84	34.9001	24.4651	27.1109	36.5604	2.14398e-07	7.18142e-17	1.21665e-11	2.58485e-07	2	47790000	47900000	10000
G	19	8000000	8020000	19	8300000	8320000	.	.	.	.	0,255,255	83	23.0988	17.5223	19.6929	22.5044	4.22913e-16	5.30484e-22	4.62028e-16	4.53502e-16	3	8016666	8316666	14907
G	19	9720000	9740000	19	9900000	9920000	.	.	.	.	0,255,255	82	32.2432	23.0271	20.2165	24.2606	7.82539e-07	6.60266e-16	1.36199e-15	1.32205e-15	3	9710000	9910000	20000
G	19	6040000	6060000	19	6140000	6160000	.	.	.	.	0,255,255	81	40.9487	37.618	46.0969	32.7972	0.00127171	1.26122e-06	0.00237239	1.78301e-06	1	6050000	6150000	0
G	19	6140000	6160000	19	6300000	6320000	.	.	.	.	0,255,255	80	31.5844	31.8623	30.6163	43.0136	2.7694e-06	2.39752e-06	3.93559e-10	0.00338363	5	6166000	6322000	28284
G	19	54300000	54320000	19	54520000	54540000	.	.	.	.	0,255,255	79	22.8635	21.8738	27.974	25.8696	3.02572e-14	1.69664e-14	9.26486e-10	1.04225e-09	4	54330000	54535000	20616
G	19	34720000	34740000	19	34820000	34840000	.	.	.	.	0,255,255	79	38.8903	33.9702	34.3349	41.9154	0.00287589	4.39614e-06	6.01111e-06	0.00503334	2	34710000	34830000	20000
G	19	11400000	11420000	19	11580000	11600000	.	.	.	.	0,255,255	79	33.7312	33.1315	40.6646	36.7233	5.05759e-06	4.39614e-06	0.00535045	6.24902e-06	4	11385000	11580000	33541
G	19	33460000	33480000	19	33600000	33620000	.	.	.	.	0,255,255	78	39.2101	33.578	38.9147	32.0472	0.00428746	8.06024e-06	0.00790725	1.12914e-05	3	33476666	33596666	14907
G	19	16140000	16160000	19	16280000	16300000	.	.	.	.	0,255,255	76	25.4106	22.5629	28.6126	30.5886	1.07891e-08	3.91725e-13	1.05105e-08	1.18297e-08	3	16156666	16296666	14907
G	19	13380000	13400000	19	13700000	13720000	.	.	.	.	0,255,255	76	26.5675	22.9077	29.3204	23.6785	1.07891e-08	3.91725e-13	1.05105e-08	7.13829e-13	4	13405000	13690000	25000
G	19	39600000	39620000	19	39820000	39840000	.	.	.	.	0,255,255	73	28.4914	26.1734	26.0465	32.925	1.10855e-07	7.53725e-08	1.0945e-07	0.000186341	2	39610000	39820000	10000
G	19	33720000	33740000	19	33880000	33900000	.	.	.	.	0,255,255	73	20.5894	17.7471	18.7371	23.9952	1.27337e-11	1.73893e-16	5.77367e-16	1.45883e-11	4	33735000	33890000	20616
G	19	30260000	30280000	19	30360000	30380000	.	.	.	.	0,255,255	72	21.2219	25.2228	24.269	28.8271	3.31543e-11	1.59911e-07	3.55031e-11	2.52549e-07	4	30245000	30365000	25495
G	19	56020000	56040000	19	56120000	56140000	.	.	.	.	0,255,255	71	33.6948	26.1268	29.0788	32.3181	0.000415893	3.34276e-07	4.79569e-07	0.000531405	1	56030000	56130000	0
G	19	46780000	46800000	19	47000000	47020000	.	.	.	.	0,255,255	71	21.5383	19.5532	20.5066	34.0568	8.43544e-11	1.84099e-15	9.07043e-11	0.000531405	2	46790000	47000000	10000
G	19	10220000	10240000	19	10340000	10360000	.	.	.	.	0,255,255	70	38.1545	29.6648	30.3738	36.9873	0.000669599	6.80942e-07	9.78558e-07	0.000864534	1	10230000	10350000	0
G	19	38380000	38400000	19	38580000	38600000	.	.	.	.	0,255,255	68	35.0586	25.8149	36.1109	26.1572	0.00171434	2.77938e-06	0.00227662	4.27063e-06	2	38390000	38580000	10000
G	19	17180000	17200000	19	17380000	17400000	.	.	.	.	0,255,255	68	31.9513	22.4042	32.6535	22.985	0.00171434	9.12319e-10	0.00227662	1.44799e-09	1	17190000	17390000	0
G	19	41700000	41720000	19	41800000	41820000	.	.	.	.	0,255,255	67	36.3635	29.5314	32.1684	33.4497	0.00268268	5.41443e-06	0.0035743	0.00349546	1	41710000	41810000	0
G	19	7620000	7640000	19	7860000	7880000	.	.	.	.	0,255,255	67	21.4643	18.8741	19.7449	26.9004	3.23989e-09	1.85887e-13	3.33101e-09	8.29098e-06	1	7630000	7870000	0
G	19	46520000	46540000	19	46700000	46720000	.	.	.	.	0,255,255	65	29.7678	30.8091	30.6759	37.3976	2.79503e-05	2.04135e-05	2.90589e-05	0.00829007	1	46530000	46710000	0
G	19	56580000	56600000	19	56680000	56700000	.	.	.	.	0,255,255	63	27.054	23.4907	30.0707	24.2733	9.47612e-05	7.08708e-08	9.95566e-05	1.06197e-07	2	56580000	56690000	10000
G	19	55640000	55660000	19	55920000	55940000	.	.	.	.	0,255,255	63	21.2343	18.1033	27.7431	22.5782	9.58217e-08	1.43702e-11	9.95566e-05	1.06197e-07	6	55650000	55936666	33334
G	19	16860000	16880000	19	17100000	17120000	.	.	.	.	0,255,255	63	23.722	27.0721	34.2038	30.1951	9.58217e-08	7.2824e-05	0.018852	0.000105485	8	16867500	17147500	43732
G	19	43600000	43620000	19	43700000	43720000	.	.	.	.	0,255,255	60	29.2131	26.9417	29.5732	26.0697	0.000530416	0.000422253	0.00056884	0.000602577	1	43610000	43710000	0
G	19	46520000	46540000	19	46760000	46780000	.	.	.	.	0,255,255	59	30.8862	24.5928	26.0137	29.5559	0.00089721	0.000722236	0.000979146	0.00103786	1	46530000	46770000	0
G	19	33900000	33920000	19	34260000	34280000	.	.	.	.	0,255,255	59	18.2886	16.3905	18.2757	18.9181	1.4912e-09	8.82483e-10	1.98392e-09	2.16455e-09	4	33920000	34260000	14142
G	19	760000	780000	19	900000	920000	.	.	.	.	0,255,255	59	31.2514	26.9353	37.0982	24.9107	0.0552656	0.000722236	0.0767069	0.00103786	2	770000	890000	20000
G	19	13380000	13400000	19	13820000	13840000	.	.	.	.	0,255,255	58	20.0188	15.5671	23.4947	18.0185	4.76563e-06	2.36574e-09	5.22829e-06	5.79592e-09	1	13390000	13830000	0
G	19	18680000	18700000	19	18960000	18980000	.	.	.	.	0,255,255	57	22.6077	20.2901	20.6737	27.9182	9.96121e-06	7.84837e-06	1.08947e-05	0.00291556	2	18700000	18960000	14142
G	19	8060000	8080000	19	8300000	8320000	.	.	.	.	0,255,255	57	24.5279	21.1461	23.6274	29.75	9.96121e-06	7.84837e-06	1.08947e-05	0.00291556	1	8070000	8310000	0
G	19	1660000	1680000	19	1780000	1800000	.	.	.	.	0,255,255	57	28.5359	26.6148	28.3095	30.381	0.00242818	0.00207994	0.00278029	0.00291556	2	1670000	1800000	10000
G	19	50000000	50020000	19	50160000	50180000	.	.	.	.	0,255,255	56	19.5076	17.6341	18.799	22.8738	2.45818e-08	1.63668e-08	3.38837e-08	2.22721e-05	1	50010000	50170000	0
G	19	28740000	28760000	19	28840000	28860000	.	.	.	.	0,255,255	55	22.1884	23.753	29.1684	20.662	4.13568e-05	3.28787e-05	0.00739121	4.50358e-05	1	28750000	28850000	0
G	19	15200000	15220000	19	15660000	15680000	.	.	.	.	0,255,255	55	12.3241	12.1953	15.1103	14.9604	2.3108e-14	8.41387e-15	7.10083e-11	6.49556e-11	6	15196666	15663333	42687
G	19	51180000	51200000	19	51280000	51300000	.	.	.	.	0,255,255	54	25.6549	23.8012	19.9749	24.3915	0.00969876	6.58375e-05	8.99009e-05	8.85175e-05	1	51190000	51290000	0
G	19	4800000	4820000	19	5020000	5040000	.	.	.	.	0,255,255	53	23.4951	19.7366	20.5235	27.2729	0.000153399	0.000128764	0.000172868	0.0190987	1	4810000	5030000	0
G	19	34260000	34280000	19	34580000	34600000	.	.	.	.	0,255,255	51	20.7489	17.0048	22.3852	18.6974	0.000524585	1.42248e-06	0.000589075	2.92358e-06	4	34270000	34600000	22361
G	19	13080000	13100000	19	13360000	13380000	.	.	.	.	0,255,255	51	15.8929	12.7088	21.6898	13.6767	1.99685e-06	1.73056e-09	0.000589075	5.11283e-09	2	13080000	13370000	10000
G	19	10600000	10620000	19	10760000	10780000	.	.	.	.	0,255,255	51	22.8127	24.208	25.4615	26.0092	0.000524585	0.000458087	0.0409719	0.0425935	2	10600000	10780000	14142
G	19	47260000	47280000	19	47500000	47520000	.	.	.	.	0,255,255	50	21.8175	16.3243	15.3583	24.4104	0.000950898	3.25008e-06	1.58062e-08	0.00108281	1	47270000	47510000	0
G	19	33180000	33200000	19	33380000	33400000	.	.	.	.	0,255,255	48	23.7951	21.5909	22.4318	18.4778	0.00288262	0.00267379	0.00334899	3.09954e-05	1	33190000	33390000	0
G	19	5080000	5100000	19	5560000	5580000	.	.	.	.	0,255,255	48	10.6553	9.34183	10.5767	14.2401	1.68646e-10	5.2697e-14	2.0432e-10	1.07259e-07	2	5070000	5570000	20000
G	19	43440000	43460000	19	43560000	43580000	.	.	.	.	0,255,255	47	19.1923	19.2977	23.2553	19.4837	4.73116e-05	3.51663e-05	0.00573833	6.56083e-05	1	43450000	43570000	0
G	19	28460000	28480000	19	28800000	28820000	.	.	.	.	0,255,255	46	12.5354	13.4222	18.4104	12.2081	5.81933e-07	2.78173e-07	0.000127292	2.37974e-09	1	28470000	28810000	0
G	19	55620000	55640000	19	56140000	56160000	.	.	.	.	0,255,255	45	11.1587	7.44747	11.4205	6.90889	5.28339e-09	5.89046e-15	7.32373e-09	1.19706e-14	1	55630000	56150000	0
G	19	50860000	50880000	19	51280000	51300000	.	.	.	.	0,255,255	45	13.907	13.895	15.9528	16.4125	1.46906e-06	7.21584e-07	0.000252743	0.000268835	1	50870000	51290000	0
G	19	2640000	2660000	19	2860000	2880000	.	.	.	.	0,255,255	45	17.4015	13.5714	19.8698	11.8109	0.000197235	7.21584e-07	0.0157673	7.6973e-09	1	2650000	2870000	0
G	19	50440000	50460000	19	50620000	50640000	.	.	.	.	0,255,255	43	11.2934	9.43902	12.5274	11.4636	4.61576e-08	6.09127e-11	1.02928e-05	6.80604e-08	2	50450000	50640000	10000
G	19	48840000	48860000	19	49080000	49100000	.	.	.	.	0,255,255	43	16.9296	15.0963	18.4398	22.457	0.000750272	4.47835e-06	0.000954867	0.0396147	2	48850000	49080000	10000
G	19	17560000	17580000	19	17940000	17960000	.	.	.	.	0,255,255	42	18.5009	15.6775	17.0881	18.2799	0.00142013	0.00118991	0.00179882	0.00192477	1	17570000	17950000	0
G	19	56580000	56600000	19	56820000	56840000	.	.	.	.	0,255,255	41	18.3004	17.5757	23.8426	21.9281	0.00261485	0.00224138	0.0907042	0.0904169	2	56580000	56840000	14142
G	19	3740000	3760000	19	3960000	3980000	.	.	.	.	0,255,255	39	18.1986	13.609	14.1502	15.2175	0.00811595	0.000132649	0.000261891	0.000269024	1	3750000	3970000	0
G	19	58240000	58260000	19	58660000	58680000	.	.	.	.	0,255,255	38	9.44122	12.9657	14.093	18.5542	6.44935e-08	0.000288967	0.000546816	0.0186876	3	58250000	58670000	20000
G	19	30240000	30260000	19	31140000	31160000	.	.	.	.	0,255,255	37	10.9704	7.91274	10.573	12.5483	1.7205e-05	1.04619e-07	2.27931e-05	0.0011733	4	30245000	31135000	35355
G	19	14680000	14700000	19	14980000	15000000	.	.	.	.	0,255,255	35	11.917	9.03842	12.7073	8.00289	9.7188e-05	1.02384e-06	0.00428755	2.5818e-06	1	14690000	14990000	0
G	19	32780000	32800000	19	33000000	33020000	.	.	.	.	0,255,255	33	13.463	12.463	13.9687	11.8059	0.0106752	0.00898231	0.0142996	0.000681913	2	32780000	33020000	14142
G	19	31140000	31160000	19	32700000	32720000	.	.	.	.	0,255,255	33	11.5862	9.5254	10.7755	14.8396	0.000488567	8.7976e-06	0.000641389	0.0149253	1	31150000	32710000	0
G	19	41160000	41180000	19	41640000	41660000	.	.	.	.	0,255,255	31	4.39317	6.68043	9.36993	7.41042	1.32004e-10	1.54098e-06	0.000127624	3.15818e-06	3	41163333	41670000	24037
G	19	38720000	38740000	19	39120000	39140000	.	.	.	.	0,255,255	30	8.50163	8.06049	8.57686	10.4959	0.000226592	0.000170239	0.000317014	0.00603059	1	38730000	39130000	0
G	19	57900000	57920000	19	58660000	58680000	.	.	.	.	0,255,255	29	8.39853	8.87702	9.75285	12.3798	0.000537055	0.000414028	0.000719798	0.0116507	1	57910000	58670000	0
G	19	33700000	33720000	19	34260000	34280000	.	.	.	.	0,255,255	28	8.50017	7.35645	8.95126	9.747	0.0012333	4.59852e-05	0.00163764	0.00179869	2	33720000	34260000	14142
G	19	33920000	33940000	19	34580000	34600000	.	.	.	.	0,255,255	27	8.27063	7.54711	9.61999	9.19995	0.00262357	0.000129915	0.00356938	0.00380603	1	33930000	34590000	0
G	19	23540000	23560000	19	24300000	24320000	.	.	.	.	0,255,255	26	4.33417	5.25065	5.42349	5.19177	3.57045e-07	1.67028e-05	2.88058e-05	3.16836e-05	2	23560000	24300000	14142
G	19	55480000	55500000	19	56300000	56320000	.	.	.	.	0,255,255	24	6.27944	6.21628	5.99315	6.34459	0.00237187	0.000168501	0.000272765	0.00338776	1	55490000	56310000	0
G	19	44340000	44360000	19	44960000	44980000	.	.	.	.	0,255,255	22	7.33016	5.88316	7.10488	7.13797	0.0112478	0.0014252	0.0162771	0.0161887	2	44350000	44980000	10000
G	19	57600000	57620000	19	58640000	58660000	.	.	.	.	0,255,255	21	5.03135	4.73112	5.95753	5.10296	0.00327184	0.000365501	0.00539926	0.00540901	1	57610000	58650000	0
G	1	144920000	144940000	1	145040000	145060000	.	.	.	.	0,255,255	175	65.3741	72.0712	89.2619	77.358	3.15139e-18	5.20664e-18	7.51344e-10	9.01613e-10	4	144915000	145065000	25495
G	1	23860000	23880000	1	23960000	23980000	.	.	.	.	0,255,255	167	59.0895	47.7912	52.6971	56.8931	7.84771e-24	8.24424e-34	1.095e-23	2.26515e-23	2	23870000	23980000	10000
G	1	31260000	31280000	1	31380000	31400000	.	.	.	.	0,255,255	150	45.1217	35.7397	33.3589	43.9223	1.14171e-25	1.40612e-35	3.46774e-35	1.8266e-25	5	31266000	31390000	25612
G	1	201980000	202000000	1	202080000	202100000	.	.	.	.	0,255,255	143	56.4697	39.7653	53.6558	47.8299	3.05303e-15	6.62628e-23	8.51981e-15	1.58995e-22	4	201975000	202090000	20616
G	1	201520000	201540000	1	201660000	201680000	.	.	.	.	0,255,255	135	43.2218	40.3017	59.8566	41.0125	1.65813e-19	1.10559e-19	2.52478e-12	1.92932e-19	4	201525000	201655000	25495
G	1	203820000	203840000	1	204080000	204100000	.	.	.	.	0,255,255	125	32.2265	23.0314	27.4004	26.7663	1.16267e-22	1.06312e-40	6.21779e-31	4.64205e-31	6	203840000	204086666	38005
G	1	62640000	62660000	1	62860000	62880000	.	.	.	.	0,255,255	118	27.1389	22.1604	27.8324	31.6686	6.83183e-27	6.73483e-36	3.1799e-27	1.6487e-19	8	62640000	62872500	34731
G	1	53740000	53760000	1	53840000	53860000	.	.	.	.	0,255,255	118	51.2208	40.7236	55.4081	48.4387	3.75398e-08	2.44939e-13	1.1733e-07	3.70046e-13	3	53743333	53863333	14907
G	1	17440000	17460000	1	17560000	17580000	.	.	.	.	0,255,255	115	34.8374	36.5417	41.8817	40.807	2.06053e-18	1.19933e-18	4.01308e-12	3.60606e-12	4	17445000	17575000	25495
G	1	94980000	95000000	1	95260000	95280000	.	.	.	.	0,255,255	114	30.3845	23.3674	35.2635	29.2067	4.55742e-25	1.67162e-33	4.36999e-18	3.58329e-25	7	94981428	95272857	31558
G	1	24520000	24540000	1	24700000	24720000	.	.	.	.	0,255,255	114	36.5517	32.7054	43.0184	36.9549	5.36749e-18	3.15018e-18	8.33254e-12	7.01808e-18	8	24527500	24702500	39528
G	1	94520000	94540000	1	94640000	94660000	.	.	.	.	0,255,255	113	48.2176	48.2144	57.2475	42.8763	1.0468e-11	1.08969e-11	1.62922e-06	1.61156e-11	2	94530000	94640000	10000
G	1	68580000	68600000	1	68800000	68820000	.	.	.	.	0,255,255	111	23.9691	23.4593	31.9889	29.5636	2.27884e-31	1.21353e-31	6.78892e-17	9.74103e-24	6	68580000	68820000	31623
G	1	46500000	46520000	1	46640000	46660000	.	.	.	.	0,255,255	111	42.452	38.3631	49.1585	35.1619	4.42579e-11	5.16855e-17	4.64312e-06	1.16095e-16	6	46503333	46646666	37267
G	1	171760000	171780000	1	171940000	171960000	.	.	.	.	0,255,255	108	34.4124	28.2077	33.1408	33.5731	1.43099e-15	1.67086e-22	1.17083e-15	1.74692e-15	5	171786000	171934000	33941
G	1	150040000	150060000	1	150140000	150160000	.	.	.	.	0,255,255	107	50.2424	45.727	59.5979	50.4602	1.17856e-05	9.23311e-10	3.28889e-05	3.46847e-05	2	150050000	150160000	10000
G	1	93320000	93340000	1	93440000	93460000	.	.	.	.	0,255,255	106	38.1989	32.6957	40.0857	36.0811	9.08784e-15	5.51904e-15	2.65458e-09	1.08023e-14	6	93320000	93450000	22361
G	1	28180000	28200000	1	28300000	28320000	.	.	.	.	0,255,255	106	45.2263	40.1151	39.7244	50.9823	1.58807e-09	1.8185e-09	2.65458e-09	5.44609e-05	2	28180000	28310000	10000
G	1	21560000	21580000	1	21660000	21680000	.	.	.	.	0,255,255	106	44.5438	32.014	45.1345	40.9622	1.58807e-09	5.51904e-15	2.65458e-09	2.60672e-09	4	21570000	21685000	20616
G	1	202460000	202480000	1	202560000	202580000	.	.	.	.	0,255,255	105	49.5738	45.3042	50.0418	46.8158	3.05526e-05	3.66673e-09	8.67828e-05	5.21373e-09	3	202463333	202583333	14907
G	1	184760000	184780000	1	184940000	184960000	.	.	.	.	0,255,255	104	30.806	27.6312	28.5948	34.6243	3.31924e-20	1.4245e-20	2.90716e-20	5.54599e-14	5	184778000	184950000	37736
G	1	40600000	40620000	1	40800000	40820000	.	.	.	.	0,255,255	104	35.4333	39.7552	48.5547	41.1204	4.51026e-14	7.05577e-09	1.06492e-08	1.00041e-08	9	40576666	40821111	49341
G	1	203320000	203340000	1	203420000	203440000	.	.	.	.	0,255,255	103	49.4052	46.7761	49.2939	54.7881	7.45667e-05	1.3694e-08	0.000193008	0.000208706	5	203326000	203438000	32249
G	1	110740000	110760000	1	110860000	110880000	.	.	.	.	0,255,255	103	35.2053	31.361	38.7031	30.5661	1.0326e-13	7.84126e-14	1.01406e-13	8.61101e-20	2	110750000	110860000	10000
G	1	153480000	153500000	1	153580000	153600000	.	.	.	.	0,255,255	102	55.0073	38.6346	44.7411	50.5884	0.000118057	1.90458e-13	4.01045e-08	0.000330736	2	153500000	153600000	14142
G	1	202140000	202160000	1	202280000	202300000	.	.	.	.	0,255,255	100	34.5825	26.0606	29.8962	27.443	1.21908e-12	1.06022e-18	2.09772e-18	2.04371e-18	3	202156666	202283333	14908
G	1	16400000	16420000	1	16500000	16520000	.	.	.	.	0,255,255	100	33.6616	29.676	37.7526	35.3393	1.21908e-12	1.06022e-18	1.30618e-12	1.34961e-12	2	16410000	16520000	10000
G	1	244760000	244780000	1	244940000	244960000	.	.	.	.	0,255,255	99	30.971	26.8142	29.6052	32.304	2.83451e-12	3.13707e-18	5.93976e-18	3.06842e-12	4	244780000	244960000	14142
G	1	110180000	110200000	1	110300000	110320000	.	.	.	.	0,255,255	99	43.2951	33.1018	35.1373	28.7781	1.36224e-07	2.2037e-12	2.9516e-12	5.91264e-18	2	110190000	110300000	10000
G	1	44220000	44240000	1	44380000	44400000	.	.	.	.	0,255,255	99	31.2227	33.3167	38.2125	37.4733	2.83451e-12	2.2037e-12	2.9516e-12	3.06842e-12	5	44214000	44410000	25612
G	1	52360000	52380000	1	52460000	52480000	.	.	.	.	0,255,255	98	51.2336	47.9209	50.2539	52.4832	0.000607477	3.59332e-07	0.00158095	0.0016728	4	52360000	52470000	22361
G	1	29220000	29240000	1	29340000	29360000	.	.	.	.	0,255,255	98	32.2377	33.5679	42.1195	37.7196	6.26913e-12	4.93788e-12	4.66075e-07	7.07922e-12	6	29226666	29353333	23571
G	1	28400000	28420000	1	28520000	28540000	.	.	.	.	0,255,255	98	40.523	35.3256	29.6867	48.5518	2.50038e-07	4.93788e-12	1.68139e-17	4.5895e-07	4	28415000	28530000	20616
G	1	12160000	12180000	1	12260000	12280000	.	.	.	.	0,255,255	98	38.5995	29.7552	33.7974	35.7974	6.26913e-12	8.92973e-18	6.51037e-12	7.07922e-12	1	12170000	12270000	0
G	1	231480000	231500000	1	231720000	231740000	.	.	.	.	0,255,255	97	29.2605	24.9754	30.4952	30.8167	5.44461e-17	2.61048e-17	4.74991e-17	5.06003e-17	7	231484285	231718571	38439
G	1	201840000	201860000	1	201940000	201960000	.	.	.	.	0,255,255	96	44.7569	34.7717	36.9489	42.6223	8.00031e-07	2.4666e-11	3.41397e-11	1.39195e-06	2	201840000	201950000	10000
G	1	146960000	146980000	1	147080000	147100000	.	.	.	.	0,255,255	96	34.0738	37.9176	43.2875	40.8745	3.1391e-11	2.4666e-11	1.46298e-06	1.39195e-06	3	146976666	147096666	14907
G	1	157940000	157960000	1	158060000	158080000	.	.	.	.	0,255,255	95	34.9384	27.8362	39.1596	32.4549	6.73088e-11	1.99805e-16	2.57362e-06	7.94804e-11	4	157945000	158075000	25495
G	1	149920000	149940000	1	150020000	150040000	.	.	.	.	0,255,255	95	37.1701	33.4616	34.4781	36.6145	6.73088e-11	5.48368e-11	7.61779e-11	7.94804e-11	2	149920000	150030000	10000
G	1	66420000	66440000	1	66700000	66720000	.	.	.	.	0,255,255	95	22.8058	17.7543	20.8336	20.5934	3.02871e-22	2.42394e-29	3.12998e-22	4.00642e-22	4	66435000	66705000	25495
G	1	45820000	45840000	1	45940000	45960000	.	.	.	.	0,255,255	95	42.5217	34.8797	39.3981	40.3693	1.42994e-06	5.48368e-11	2.57362e-06	2.4455e-06	3	45836666	45956666	14907
G	1	212240000	212260000	1	212540000	212560000	.	.	.	.	0,255,255	94	23.3975	20.7053	35.2345	23.4111	1.02339e-21	5.65543e-22	1.67085e-10	1.26351e-21	8	212232500	212547500	66427
G	1	210040000	210060000	1	210140000	210160000	.	.	.	.	0,255,255	94	35.6712	37.9886	36.1498	41.268	1.4893e-10	1.22597e-10	1.67085e-10	4.2358e-06	5	210038000	210154000	25298
G	1	27420000	27440000	1	27600000	27620000	.	.	.	.	0,255,255	94	31.1201	29.2574	33.6955	38.8492	1.4893e-10	5.58982e-16	1.67085e-10	1.7594e-10	2	27430000	27620000	10000
G	1	26920000	26940000	1	27120000	27140000	.	.	.	.	0,255,255	94	27.5045	30.2522	42.8692	35.236	1.09138e-15	5.58982e-16	4.56165e-06	1.7594e-10	6	26923333	27163333	48534
G	1	17820000	17840000	1	17920000	17940000	.	.	.	.	0,255,255	94	39.5403	32.8333	37.2221	41.2986	2.49029e-06	1.22597e-10	1.67085e-10	4.2358e-06	4	17820000	17940000	14142
G	1	94480000	94500000	1	94800000	94820000	.	.	.	.	0,255,255	93	22.8387	20.8256	28.4468	27.6609	3.56452e-21	1.79613e-21	2.52175e-15	2.7465e-15	6	94503333	94806666	49554
G	1	39800000	39820000	1	39900000	39920000	.	.	.	.	0,255,255	93	40.6026	42.1885	45.441	40.0585	4.35991e-06	6.27922e-06	7.9073e-06	7.42203e-06	3	39796666	39916666	27487
G	1	8060000	8080000	1	8360000	8380000	.	.	.	.	0,255,255	93	27.6924	21.9175	32.4507	24.8126	2.84131e-15	1.79613e-21	3.60882e-10	2.7465e-15	11	8057272	8388181	37439
G	1	2120000	2140000	1	2300000	2320000	.	.	.	.	0,255,255	93	27.2694	19.9276	22.9845	25.6966	2.84131e-15	1.79613e-21	3.57208e-21	2.7465e-15	4	2145000	2315000	25495
G	1	209740000	209760000	1	209860000	209880000	.	.	.	.	0,255,255	92	40.5218	37.5922	45.4205	43.2548	7.27053e-06	5.80525e-10	1.36408e-05	1.25751e-05	1	209750000	209870000	0
G	1	206660000	206680000	1	206760000	206780000	.	.	.	.	0,255,255	92	47.9152	36.0842	42.0258	42.0855	7.27053e-06	5.80525e-10	1.36408e-05	1.25751e-05	1	206670000	206770000	0
G	1	203460000	203480000	1	203660000	203680000	.	.	.	.	0,255,255	92	35.6872	27.7497	37.4974	29.3975	6.97224e-10	4.14384e-15	7.80263e-10	7.41497e-15	3	203470000	203650000	20000
G	1	156440000	156460000	1	156560000	156580000	.	.	.	.	0,255,255	92	39.9388	34.9098	40.1819	30.4914	7.27053e-06	5.80525e-10	1.36408e-05	7.41497e-15	2	156450000	156560000	10000
G	1	43680000	43700000	1	43840000	43860000	.	.	.	.	0,255,255	92	42.9091	35.2288	43.2908	28.4214	7.27053e-06	5.80525e-10	1.36408e-05	7.41497e-15	4	43690000	43885000	45000
G	1	41300000	41320000	1	41400000	41420000	.	.	.	.	0,255,255	92	44.2473	39.6936	38.4228	49.167	7.27053e-06	1.07067e-05	7.80263e-10	0.0152057	2	41310000	41420000	10000
G	1	222960000	222980000	1	223260000	223280000	.	.	.	.	0,255,255	91	21.3151	17.0487	23.2596	20.8679	4.1216e-20	7.8782e-27	4.5028e-20	4.75453e-20	10	222962000	223258000	34176
G	1	68020000	68040000	1	68140000	68160000	.	.	.	.	0,255,255	91	44.1922	41.3918	53.2326	41.8296	1.21658e-05	1.77783e-05	0.0180626	2.08938e-05	3	68030000	68163333	33334
G	1	45480000	45500000	1	45760000	45780000	.	.	.	.	0,255,255	91	29.6854	23.5672	31.0374	27.9965	2.09691e-14	2.15772e-20	1.67747e-09	2.01251e-14	5	45482000	45778000	34176
G	1	25000000	25020000	1	25160000	25180000	.	.	.	.	0,255,255	91	45.8964	35.6763	50.9884	36.926	1.21658e-05	1.24945e-09	0.0180626	1.83835e-09	6	25000000	25150000	22361
G	1	9360000	9380000	1	9500000	9520000	.	.	.	.	0,255,255	91	37.1199	38.5588	38.1609	43.474	1.50065e-09	1.24945e-09	1.67747e-09	2.08938e-05	7	9338571	9527142	36589
G	1	210300000	210320000	1	210480000	210500000	.	.	.	.	0,255,255	90	24.464	24.0255	34.1554	29.9779	1.4068e-19	7.14192e-20	3.56767e-09	5.32164e-14	5	210318000	210506000	25298
G	1	67980000	68000000	1	68200000	68220000	.	.	.	.	0,255,255	90	36.5152	29.4749	36.3148	28.4175	3.22381e-09	3.03902e-14	3.56767e-09	5.32164e-14	4	68005000	68220000	26926
G	1	20840000	20860000	1	20960000	20980000	.	.	.	.	0,255,255	90	37.0243	26.3381	28.4175	32.3988	3.22381e-09	3.03902e-14	4.92766e-14	3.92367e-09	3	20856666	20963333	14908
G	1	205320000	205340000	1	205440000	205460000	.	.	.	.	0,255,255	89	39.1678	37.0817	46.092	37.6905	3.30882e-05	5.34669e-09	6.2416e-05	8.13344e-09	5	205318000	205470000	23324
G	1	204120000	204140000	1	204320000	204340000	.	.	.	.	0,255,255	89	27.7557	22.7289	22.5845	37.2506	1.37962e-13	2.35326e-19	5.17364e-19	8.13344e-09	4	204140000	204345000	26926
G	1	36020000	36040000	1	36180000	36200000	.	.	.	.	0,255,255	89	32.6688	31.7235	40.6912	40.3871	6.6951e-09	5.34669e-09	6.2416e-05	5.89229e-05	4	36040000	36210000	41231
G	1	26220000	26240000	1	26320000	26340000	.	.	.	.	0,255,255	89	47.3879	34.3173	36.0293	41.3464	3.30882e-05	5.34669e-09	7.35771e-09	5.89229e-05	2	26220000	26330000	10000
G	1	9340000	9360000	1	9540000	9560000	.	.	.	.	0,255,255	89	36.0349	32.4999	43.1338	31.7285	6.6951e-09	5.34669e-09	6.2416e-05	8.13344e-09	1	9350000	9550000	0
G	1	180840000	180860000	1	181120000	181140000	.	.	.	.	0,255,255	88	21.3234	14.9434	15.8258	26.2766	1.46202e-18	3.10834e-31	2.56155e-24	3.54416e-13	2	180860000	181130000	10000
G	1	175120000	175140000	1	175280000	175300000	.	.	.	.	0,255,255	88	27.8901	27.5575	32.3944	33.8363	3.53047e-13	2.07272e-13	1.56352e-08	1.67142e-08	4	175125000	175290000	20616
G	1	162600000	162620000	1	162720000	162740000	.	.	.	.	0,255,255	88	31.8521	38.2369	44.5947	43.5392	1.38921e-08	1.11855e-08	0.000102007	9.58501e-05	5	162590000	162754000	43081
G	1	95300000	95320000	1	95500000	95520000	.	.	.	.	0,255,255	88	29.5278	21.5721	26.7219	31.3783	3.53047e-13	7.45397e-19	3.20437e-13	1.67142e-08	5	95310000	95510000	20000
G	1	90280000	90300000	1	90440000	90460000	.	.	.	.	0,255,255	88	30.7829	24.5854	26.9224	29.114	3.53047e-13	7.45397e-19	3.20437e-13	3.54416e-13	4	90285000	90445000	25495
G	1	178500000	178520000	1	178700000	178720000	.	.	.	.	0,255,255	87	38.4624	31.8649	38.7867	41.5955	2.75055e-08	2.25838e-08	3.11128e-08	0.000152161	3	178516666	178716666	14907
G	1	174740000	174760000	1	174940000	174960000	.	.	.	.	0,255,255	87	34.2294	25.8647	28.6688	30.3723	2.75055e-08	5.22644e-13	8.11379e-13	9.08633e-13	5	174746000	174958000	32249
G	1	85580000	85600000	1	85700000	85720000	.	.	.	.	0,255,255	87	36.411	33.3239	38.7117	38.67	2.75055e-08	2.25838e-08	3.11128e-08	3.36668e-08	4	85585000	85710000	20616
G	1	192440000	192460000	1	192540000	192560000	.	.	.	.	0,255,255	86	42.9315	29.7254	38.6373	31.106	0.000136216	1.31348e-12	6.16081e-08	6.6643e-08	2	192450000	192560000	10000
G	1	164580000	164600000	1	164740000	164760000	.	.	.	.	0,255,255	86	31.7828	36.9692	35.7057	52.0495	5.49521e-08	4.42724e-08	6.16081e-08	0.084265	3	164583333	164750000	33333
G	1	95380000	95400000	1	95500000	95520000	.	.	.	.	0,255,255	86	35.1382	33.057	31.2907	47.9239	5.49521e-08	4.42724e-08	6.16081e-08	0.000236755	1	95390000	95510000	0
G	1	214820000	214840000	1	215680000	215700000	.	.	.	.	0,255,255	85	18.6475	13.1045	17.4273	21.2184	1.05796e-22	3.35647e-29	1.29987e-22	4.80093e-17	6	214826666	215693333	23571
G	1	210580000	210600000	1	211300000	211320000	.	.	.	.	0,255,255	85	18.8063	16.8997	20.264	27.0234	1.05796e-22	3.44716e-23	5.2607e-17	5.68171e-12	4	210615000	211315000	25495
G	1	162840000	162860000	1	163020000	163040000	.	.	.	.	0,255,255	85	29.8533	26.915	35.5733	28.6501	5.3216e-12	3.27248e-12	1.25977e-07	5.68171e-12	2	162840000	163030000	10000
G	1	94520000	94540000	1	94780000	94800000	.	.	.	.	0,255,255	85	26.5122	28.9743	39.9248	33.9948	5.3216e-12	3.27248e-12	0.000413397	1.32769e-07	1	94530000	94790000	0
G	1	85080000	85100000	1	85200000	85220000	.	.	.	.	0,255,255	85	33.8888	28.6058	29.2559	34.366	1.11003e-07	3.27248e-12	4.86217e-12	1.32769e-07	1	85090000	85210000	0
G	1	41760000	41780000	1	41860000	41880000	.	.	.	.	0,255,255	85	38.9128	37.6112	44.366	36.3762	0.000222349	9.17834e-08	0.000413397	1.32769e-07	3	41756666	41876666	14907
G	1	179080000	179100000	1	179180000	179200000	.	.	.	.	0,255,255	84	38.7754	32.8952	42.8473	32.3698	2.14398e-07	1.77849e-07	0.00063773	2.58485e-07	1	179090000	179190000	0
G	1	155300000	155320000	1	155540000	155560000	.	.	.	.	0,255,255	84	33.6463	33.4261	34.3023	43.9258	2.14398e-07	1.77849e-07	2.42947e-07	0.000611679	1	155310000	155550000	0
G	1	110320000	110340000	1	110520000	110540000	.	.	.	.	0,255,255	84	37.2517	30.9544	40.2294	38.0376	2.14398e-07	1.77849e-07	0.00063773	2.58485e-07	3	110330000	110530000	20000
G	1	32680000	32700000	1	32780000	32800000	.	.	.	.	0,255,255	84	40.3106	36.646	39.7292	41.76	0.000342668	1.77849e-07	0.00063773	0.000611679	2	32690000	32800000	10000
G	1	16820000	16840000	1	16960000	16980000	.	.	.	.	0,255,255	84	33.4076	38.3169	45.958	38.8984	2.14398e-07	1.77849e-07	0.00063773	0.000611679	2	16830000	16960000	10000
[truncated: 19,581 more rows]
