# Supplementary material for: The loss of heterochromatin is associated with multiscale three-dimensional genome reorganization and aberrant transcription during cellular senescence
Source: HighWire-hosted journal article supplement (doi:10.1101/gr.275235.121), 2021-06-17
Supplement: Supplemental_Table_S7.xlsx [file Supplemental_Table_S7.xlsx]

## Sheet: repetitive expression
Table S7: The list of differentially expressed repetitive elements across different comparisons.
name	logFC.q_g	FDR.q_g	logFC.s_g	FDR.s_g	logFC.ds_g	FDR.ds_g	class	type
HSATII	-0.0930936	0.991468	6.33501	2.83538e-77	5.75592	5.59517e-62	Satellite	Satellite
LTR39	0.534066	0.028947	2.39326	4.06708e-41	3.788	7.76887e-93	LTR	ERV1
LTR48B	0.195224	0.163335	0.955061	7.23339e-30	0.64714	6.45312e-14	LTR	ERV1
_GAAA_n	0.0590144	0.945989	1.23213	1.15428e-17	1.79733	1.00826e-37	Simple_repeat	Simple_repeat
_CATTC_n	0.323614	0.570603	2.10759	1.62218e-17	2.00603	1.804e-16	Satellite	Satellite
MER92B	-1.08142	3.09163e-45	-0.677076	2.06226e-17	-0.84858	1.00322e-27	LTR	ERV1
LTR1D	-0.0661815	0.82914	0.736491	1.15616e-16	1.0439	1.01791e-34	LTR	ERV1
MER136	-0.204596	0.225976	-0.828898	6.46061e-16	-2.05294	9.8132e-87	DNA	DNA
_CAA_n	-0.0185126	0.991468	0.984783	2.64095e-15	1.44961	3.26518e-33	Simple_repeat	Simple_repeat
_TTA_n	-0.0741124	0.842167	0.826359	4.35622e-15	0.84197	4.9815e-16	Simple_repeat	Simple_repeat
LTR33A_	0.134239	0.411652	0.6373	2.19557e-14	0.406484	3.8314e-06	LTR	ERVL
LTR9	0.203697	0.179121	0.710715	2.19557e-14	0.361193	0.00045972	LTR	ERV1
MST-int	0.00536716	1	0.812328	4.73012e-14	0.778108	3.69235e-13	LTR	ERVL-MaLR
ALR_Alpha	0.0219736	0.993729	1.23496	3.50696e-13	0.857132	9.89644e-07	Satellite	centr
SST1	0.363487	0.0524027	0.963543	3.58533e-13	0.54086	0.000212441	Satellite	centr
_TTTTTG_n	0.0518947	0.961246	1.01127	3.54398e-12	1.45173	5.75808e-25	Simple_repeat	Simple_repeat
MER4-int	-0.00720765	1	0.697382	2.06888e-11	0.909021	1.38433e-19	LTR	ERV1
L1M3de	-1.13872	5.57643e-22	-0.806434	7.51605e-11	-0.698288	1.49332e-08	LINE	L1
_CCAA_n	0.455103	0.000512141	0.743505	8.80269e-11	0.706268	6.06584e-10	Simple_repeat	Simple_repeat
_CAAT_n	-0.304919	0.0568961	-0.713384	1.86238e-09	-0.793772	6.04202e-12	Simple_repeat	Simple_repeat
THE1A-int	0.0405493	0.961246	0.741438	3.98994e-09	0.725506	5.66369e-09	LTR	ERVL-MaLR
_CAGA_n	-0.398021	6.93663e-06	-0.479528	1.46379e-08	-0.837001	1.06056e-25	Simple_repeat	Simple_repeat
THE1A	0.0253984	0.977363	0.692185	2.02325e-08	0.679548	2.32674e-08	LTR	ERVL-MaLR
HSAT5	0.712605	0.00551844	1.17509	7.02472e-08	1.73029	1.38433e-19	Satellite	Satellite
_GGCTG_n	-0.846102	9.52923e-16	-0.587231	1.2702e-07	-0.957211	5.18647e-20	Simple_repeat	Simple_repeat
_CCCCCA_n	0.0936675	0.823368	0.685451	1.70869e-07	0.470037	0.000754888	Simple_repeat	Simple_repeat
MADE2	-0.020828	0.973044	0.468534	2.26808e-07	0.619833	3.69235e-13	DNA	TcMar-Mariner
MER61-int	0.247915	0.222926	0.642045	4.2782e-07	0.64973	1.54373e-07	LTR	ERV1
MER84	-0.125935	0.891855	1.07792	5.5368e-07	1.71999	6.97207e-18	LTR	ERV1
_CAAAAA_n	-0.073126	0.956888	0.990332	1.40681e-06	1.33933	4.92291e-12	Simple_repeat	Simple_repeat
LTR2C	1.06816	9.69545e-21	0.600333	2.11437e-06	0.309035	0.0357322	LTR	ERV1
MER61C	0.220702	0.609716	0.909828	2.5132e-06	1.02025	2.98414e-08	LTR	ERV1
tRNA-Leu-TTA_m_	-0.123384	0.760311	0.673804	2.54403e-06	0.688524	7.6464e-07	tRNA	tRNA
MER113A	-0.400364	1.16359e-05	-0.402756	1.03427e-05	-0.246168	0.0133054	DNA	hAT-Charlie
_CAGCT_n	-0.323745	0.342471	-1.08403	1.12415e-05	-1.23175	2.16938e-07	Simple_repeat	Simple_repeat
Mam_R4	-0.104137	0.678942	0.449496	2.44251e-05	0.277834	0.0179822	LINE	Dong-R4
L1PA6	-0.00910487	1	0.648541	4.57507e-05	0.417746	0.0150486	LINE	L1
LTR82A	-0.12165	0.717679	-0.567252	4.74459e-05	-0.679087	2.02785e-07	LTR	ERVL
_TTTTC_n	-0.445792	0.00187684	-0.549264	5.11575e-05	-0.677659	9.49262e-08	Simple_repeat	Simple_repeat
LSU-rRNA_Hsa	-0.273691	0.620447	1.01547	7.15357e-05	2.07199	3.86065e-19	rRNA	rRNA
LTR87	-0.142099	0.371664	-0.373418	8.67615e-05	-0.302352	0.0016517	LTR	ERVL?
MER129	-0.510204	0.06418	-0.925497	0.000114317	-0.52374	0.0370087	LTR?	LTR?
Charlie4	0.756079	0.000792001	0.868154	0.000127144	0.816245	0.000244942	DNA	hAT-Charlie
MER51A	0.0897978	0.683738	0.363242	0.000155581	0.0889668	0.539098	LTR	ERV1
_CTAGT_n	0.241758	0.657156	0.882657	0.000234982	0.557234	0.0355894	Simple_repeat	Simple_repeat
MER57A1	0.0539384	0.923095	0.448544	0.000319619	0.426615	0.000429756	LTR	ERV1
HERVE-int	-0.00920994	0.996714	-0.358847	0.000469751	-0.540834	4.029e-09	LTR	ERV1
MER31A	0.0192656	0.973044	0.315164	0.000532615	0.189641	0.0575499	LTR	ERV1
MamRep564	0.279127	0.0742392	-0.4242	0.000764791	-0.865757	1.53176e-15	Unknown	Unknown
_CAAG_n	0.2786	0.555567	0.818908	0.000764791	0.740555	0.0019065	Simple_repeat	Simple_repeat
MER127	0.255887	0.537989	0.723275	0.000876349	0.712033	0.000584306	DNA	TcMar-Tigger
_TCG_n	-0.377498	0.0507435	-0.519722	0.0011079	-1.51766	6.22952e-29	Simple_repeat	Simple_repeat
MER91C	-0.285875	0.00321726	-0.305287	0.00115276	-0.544045	2.24859e-11	DNA	hAT-Tip100
U13	-0.36416	0.376109	-0.821513	0.00251181	-0.280625	0.412551	snRNA	snRNA
_ATGGTG_n	0.0277561	0.966492	0.353344	0.0030832	0.212129	0.100908	Simple_repeat	Simple_repeat
CER	0.24103	0.600527	0.695073	0.00315384	0.709002	0.00120873	Satellite	Satellite
MamRep4096	0.375467	0.000229123	0.324642	0.00315384	0.312966	0.00256135	DNA	hAT?
HERV16-int	-0.0455851	0.935556	0.345292	0.00361966	0.37526	0.000525648	LTR	ERVL
Charlie21a	0.0267503	0.983833	0.470449	0.00383569	0.529664	0.000351274	DNA	hAT-Charlie
_CCCCAA_n	-0.289196	0.574634	-0.870626	0.00383569	-0.586563	0.0502629	Simple_repeat	Simple_repeat
MSTC	-0.0193212	0.98341	0.334576	0.0041506	0.243674	0.0412113	LTR	ERVL-MaLR
LTR29	-0.0198619	0.986367	0.382075	0.00480308	0.322776	0.0151503	LTR	ERV1
THE1C-int	0.104426	0.588192	0.283309	0.0049321	0.372426	2.41504e-05	LTR	ERVL-MaLR
MER102c	-0.180493	0.191264	-0.290243	0.0049321	-0.272119	0.00578406	DNA	hAT-Charlie
Charlie10b	-0.0615099	0.951225	-0.563233	0.0049321	-0.464437	0.0188064	DNA	hAT-Charlie
_CAGTG_n	-0.624694	0.256192	-1.30265	0.0049321	-0.81069	0.0712462	Simple_repeat	Simple_repeat
MER67A	-0.100887	0.808869	-0.455277	0.0049321	-0.260864	0.138265	LTR	ERV1
_GGAAA_n	-0.556522	0.0611429	-0.803435	0.0049321	-0.329647	0.304647	Simple_repeat	Simple_repeat
HERV3-int	-0.0138874	0.993263	0.334526	0.00526123	0.102885	0.534366	LTR	ERV1
MER34B-int	-0.494872	3.63894e-08	-0.287591	0.00592102	-0.225053	0.0317893	LTR	ERV1
_CACGC_n	-0.178103	0.777992	-0.828911	0.00804243	-0.202709	0.606366	Simple_repeat	Simple_repeat
MLT1A0-int	-0.112264	0.683738	-0.348943	0.0102714	-0.621825	3.23764e-08	LTR	ERVL-MaLR
_GGAGA_n	0.284225	0.40785	0.56868	0.0102714	0.732203	0.000130694	Simple_repeat	Simple_repeat
MER34	-0.0888627	0.703808	-0.287267	0.0109484	-0.34238	0.000585922	LTR	ERV1
_CACAA_n	-0.255099	0.570603	-0.721204	0.0116612	-0.12474	0.761755	Simple_repeat	Simple_repeat
Tigger12A	0.129056	0.580064	0.320124	0.0118902	0.342282	0.00300022	DNA	TcMar-Tigger
LTR45	-0.473086	0.00339168	-0.423434	0.0121253	-0.64715	5.87209e-06	LTR	ERV1
LTR55	0.261886	0.440301	-0.568402	0.0128271	-0.270098	0.294293	LTR	ERV
LTR4	0.112301	0.892331	0.584317	0.0128697	0.315066	0.236197	LTR	ERV1
HERVFH21-int	0.325523	0.0645356	0.393169	0.0135431	0.680409	9.7029e-08	LTR	ERV1
HERVK3-int	0.10208	0.737653	0.333316	0.0135431	0.116817	0.516928	LTR	ERVK
UCON31	0.144802	0.949589	1.07258	0.0141356	0.336503	0.611138	Unknown	Unknown
MER6C	-0.259535	0.599901	-0.705824	0.0142165	-0.309725	0.346013	DNA	TcMar-Tigger
_TCCA_n	-0.350095	0.0376805	-0.374302	0.0146037	-0.727033	4.83832e-09	Simple_repeat	Simple_repeat
MER123	0.104617	0.916669	0.643577	0.014759	0.132748	0.763228	DNA	DNA
MLT2A2	0.0302679	0.961328	0.297889	0.0160878	0.285942	0.0138467	LTR	ERVL
_CAATA_n	-0.545449	0.0631604	-0.707957	0.0161629	-0.996395	0.000138089	Simple_repeat	Simple_repeat
MLT1E1A-int	0.605415	0.0253488	0.641867	0.0219327	-0.0233227	0.98536	LTR	ERVL-MaLR
MER51C	-0.0277024	0.975577	0.360341	0.0219327	1.41075	3.16492e-36	LTR	ERV1
Charlie2a	-0.395194	0.000310737	-0.282037	0.0221761	-0.485881	1.07218e-06	DNA	hAT-Charlie
HERV1_LTRe	-0.825643	0.0611429	-1.02964	0.0225419	-1.05083	0.0100631	LTR	ERV1
Charlie17a	-0.186426	0.158665	0.243003	0.0230552	0.291245	0.0017758	DNA	hAT-Charlie
HERVK11D-int	-0.454715	0.662994	1.05336	0.0267967	1.52815	2.92664e-05	LTR	ERVK
MER52C	-0.199504	0.243353	-0.296201	0.0267967	-0.273678	0.0280704	LTR	ERV1
LTR1	0.136657	0.420125	-0.256647	0.0271427	-0.103215	0.47656	LTR	ERV1
LTR19B	-0.192522	0.578517	-0.448837	0.0277831	-0.597419	0.000584306	LTR	ERV1
HERV30-int	-0.143488	0.814719	-0.568673	0.0290674	-0.5546	0.0202777	LTR	ERV1
LTR59	0.163388	0.918816	0.913578	0.0302853	0.79353	0.0488635	LTR	ERV1
_TCTA_n	-0.0219567	0.973797	0.265145	0.0307608	-0.0447965	0.823076	Simple_repeat	Simple_repeat
Charlie9	0.0456388	0.916669	0.256616	0.031395	0.16445	0.186369	DNA	hAT-Charlie
Ricksha_a	0.206354	0.682985	-0.69112	0.0318643	-0.496263	0.104872	DNA	MuDR
MER65C	-0.083508	0.772646	0.269222	0.0318643	-0.101592	0.52813	LTR	ERV1
LTR52	-0.289258	0.031971	-0.279342	0.035913	-0.319216	0.00632829	LTR	ERVL
_CCCTG_n	-0.214403	0.381943	-0.370206	0.0362561	-0.282453	0.100497	Simple_repeat	Simple_repeat
tRNA-Ser-TCA_m_	-0.243501	0.673486	0.610024	0.0362561	-0.275266	0.498309	tRNA	tRNA
THE1-int	0.12216	0.790189	0.413046	0.0377417	0.514841	0.00218082	LTR	ERVL-MaLR
MER67C	-0.537114	1.24484e-06	-0.279288	0.0430366	-0.439207	8.57565e-05	LTR	ERV1
Zaphod3	0.358817	0.0524027	0.360533	0.0430366	0.23388	0.202351	DNA	hAT-Tip100
MLT1J-int	0.100703	0.681441	0.258585	0.0484274	0.443141	1.12752e-05	LTR	ERVL-MaLR
_CGGA_n	0.0972631	0.840835	0.371969	0.0510149	-0.136866	0.572671	Simple_repeat	Simple_repeat
tRNA-Gln-CAA_	-0.485059	0.120841	0.519989	0.0510149	0.0167864	0.988155	tRNA	tRNA
_CGTG_n	0.028997	0.961246	-0.252049	0.052265	-0.300312	0.00683667	Simple_repeat	Simple_repeat
FordPrefect	-0.130025	0.767535	-0.400899	0.0553373	-0.224376	0.309147	DNA	hAT-Tip100
MER75	0.0335748	0.973044	0.367986	0.0558337	0.337626	0.0529246	DNA	PiggyBac
MER9a2	-0.161043	0.516519	-0.307872	0.0571181	-0.223067	0.158116	LTR	ERVK
MLT1L-int	0.414763	0.321435	0.641611	0.0571181	-0.296918	0.52813	LTR	ERVL-MaLR
tRNA-Thr-ACG_	0.272623	0.767535	0.816832	0.0571181	0.173258	0.804694	tRNA	tRNA
_GTCTG_n	-0.379404	0.313527	-0.577755	0.0577036	-0.199705	0.584228	Simple_repeat	Simple_repeat
Helitron1Nb_Mam	0.239292	0.588192	0.503628	0.0582475	0.328995	0.230153	RC	Helitron
tRNA-Leu-CTA_	0.566283	0.782526	1.64747	0.0584195	1.6323	0.0357636	tRNA	tRNA
MER126	0.289088	0.445151	0.497204	0.0595199	0.267797	0.363012	DNA	DNA
tRNA-Val-GTA	-1.02317	0.764521	-5.23718	0.0611547	-0.140286	0.978173	tRNA	tRNA
_CATTG_n	-0.901934	0.000215912	-0.583032	0.0633224	-0.559539	0.0442866	Simple_repeat	Simple_repeat
MLT2B3	0.0373801	0.961246	0.258854	0.0636908	0.187681	0.174561	LTR	ERVL
LTR43	-0.154841	0.74072	-0.428826	0.0670021	-0.259763	0.279281	LTR	ERV1
MER58D	0.482381	3.66131e-05	0.274677	0.0670021	-0.0123272	0.983067	DNA	hAT-Charlie
Arthur1B	0.0985312	0.777307	0.290904	0.067915	0.225571	0.139481	DNA	hAT-Tip100
MER49	0.065009	0.834668	0.22617	0.0738932	0.0245781	0.920104	LTR	ERV1
MER77B	-0.212259	0.191264	-0.250992	0.0765324	-0.17721	0.200485	LTR	ERVL
MER87B	-0.116518	0.8686	-0.458676	0.079751	-0.777444	0.000145485	LTR	ERV1
_TGGA_n	-0.14491	0.513955	-0.250088	0.0826252	-0.166049	0.246633	Simple_repeat	Simple_repeat
X7B_LINE	0.196895	0.245184	0.247435	0.0826252	0.083348	0.646506	LINE	CR1
HSAT4	-0.0278124	0.986367	-0.381647	0.0829048	-0.452667	0.0143856	Satellite	centr
ACRO1	-0.147555	0.899648	0.623889	0.082938	1.10224	8.99043e-06	Satellite	acro
MER4A1_	-0.05131	0.942594	-0.305689	0.0847644	-0.0449638	0.878722	LTR	ERV1
MER63A	-0.111837	0.547523	-0.201758	0.0947447	-0.199422	0.0571931	DNA	hAT-Blackjack
Tigger6a	0.120973	0.701721	0.28531	0.0949598	0.350604	0.0123422	DNA	TcMar-Tigger
_TATATG_n	-0.0344583	0.944673	0.199516	0.0949598	0.145964	0.202351	Simple_repeat	Simple_repeat
C-rich	-0.0514358	0.931423	0.257522	0.0949598	0.0547427	0.802572	Low_complexity	Low_complexity
Helitron3Na_Mam	0.0464055	0.937081	-0.256969	0.0972984	-0.132141	0.435243	RC	Helitron
MLT1E3-int	-0.171778	0.721502	-0.460853	0.0997542	0.0890409	0.814417	LTR	ERVL-MaLR
Ricksha_0	-0.106276	0.774317	-0.299588	0.0997542	-0.704503	1.11504e-07	DNA	MuDR
HERVK11-int	0.0200785	0.982683	-0.242978	0.0997542	-0.331883	0.00523466	LTR	ERVK
MER4E1	0.251799	0.0794963	0.24028	0.0997542	0.276375	0.0235757	LTR	ERV1
MamRep38	0.0530761	0.88249	-0.203213	0.0997542	-0.0620203	0.696167	DNA	hAT
_CAACC_n	0.579787	0.465933	-1.20984	0.100433	-1.1785	0.0635534	Simple_repeat	Simple_repeat
Harlequin-int	0.0833994	0.72176	0.203342	0.10298	0.269274	0.00727332	LTR	ERV1
MER31B	0.116662	0.721502	-0.284033	0.103518	0.169671	0.343355	LTR	ERV1
Helitron1Na_Mam	0.520931	0.254235	0.630764	0.111214	0.587364	0.0929059	RC	Helitron
_CAACT_n	-0.564013	0.222926	-0.714602	0.120369	-0.878481	0.0212242	Simple_repeat	Simple_repeat
MER45C	-0.300504	0.105116	-0.286582	0.120467	-0.280183	0.0774159	DNA	hAT-Tip100
UCON12A	0.691111	0.961246	3.96636	0.120713	1.04508	0.790132	Unknown	Unknown
LTR36	-0.0630603	0.917557	-0.295893	0.126735	-0.371292	0.0178372	LTR	ERV1
MLT1E1	-0.0318247	0.966178	-0.248831	0.126735	-0.209635	0.152333	LTR	ERVL-MaLR
_TTATG_n	-0.222599	0.77699	-0.655843	0.126735	-0.292274	0.524494	Simple_repeat	Simple_repeat
MER75A	-0.327183	0.380673	-0.509752	0.129025	-0.407429	0.174403	DNA	PiggyBac
LTR21B	0.395703	0.229728	0.462905	0.131533	0.442627	0.093493	LTR	ERV1
UCON28b	-0.0555506	0.961246	-0.465	0.133348	-1.22967	2.02416e-07	Unknown	Unknown
_TAGG_n	-0.282628	0.369858	0.366657	0.138248	0.447771	0.0235757	Simple_repeat	Simple_repeat
HERV4_I-int	0.176633	0.299621	0.213221	0.142763	0.166383	0.211179	LTR	ERV1
Charlie13b	0.0587989	0.927496	0.273113	0.142811	0.292832	0.0565041	DNA	hAT-Charlie
MER101-int	-0.0121341	0.991933	-0.187659	0.14324	-0.185748	0.087409	LTR	ERV1
L1PA8A	-0.0405888	0.936158	0.198307	0.143581	0.166643	0.173756	LINE	L1
_CTTA_n	-0.273628	0.743352	-0.76325	0.144271	-0.555878	0.230947	Simple_repeat	Simple_repeat
MLT1E1-int	3.74256	0.362918	4.68289	0.146309	4.61043	0.093493	LTR	ERVL-MaLR
UCON10	-0.38737	0.978434	3.02589	0.146309	2.29114	0.279281	Unknown	Unknown
tRNA-Arg-AGG	1.03185	0.810152	2.69936	0.146309	1.92382	0.313095	tRNA	tRNA
HERVIP10F-int	0.0857665	0.760311	0.207611	0.146854	0.187202	0.135429	LTR	ERV1
L1M3e	-0.0151947	0.993729	-0.291601	0.153672	-0.307074	0.0701116	LINE	L1
MER131	0.0416319	0.944673	0.22082	0.153672	-0.128158	0.433875	SINE?	SINE?
MER119	0.0815818	0.796396	-0.226876	0.153672	-0.0821041	0.662479	DNA	hAT-Charlie
X3_LINE	-0.285252	0.0369919	0.214848	0.155039	0.379422	0.000460018	LINE	RTE-BovB
UCON5	-0.0948682	0.964463	-0.829785	0.155039	0.105116	0.902026	Unknown	Unknown
_GTGTG_n	0.145961	0.791882	-0.398113	0.157521	-0.553269	0.0116992	Simple_repeat	Simple_repeat
_TA_n	-0.0449278	0.953974	0.251338	0.157521	0.248239	0.101464	Simple_repeat	Simple_repeat
MER67B	0.132657	0.703808	-0.289122	0.157521	-0.14273	0.523443	LTR	ERV1
tRNA-Thr-ACY_	-0.531964	0.961246	-5.05113	0.157521	-1.68374	0.544069	tRNA	tRNA
CT-rich	-0.246305	0.17136	0.238659	0.157909	0.407902	0.000993584	Low_complexity	Low_complexity
LTR80B	0.409904	0.514138	0.621209	0.164325	0.371001	0.424359	LTR	ERVL
Tigger15a	0.0157105	0.991468	0.225083	0.164477	0.261429	0.0464244	DNA	TcMar-Tigger
_TATAA_n	0.214156	0.692971	-0.510479	0.164477	-0.228623	0.552081	Simple_repeat	Simple_repeat
_CAGGA_n	-0.446479	0.299621	-0.522505	0.171271	-0.214992	0.608883	Simple_repeat	Simple_repeat
_G_n	-0.0179607	1	-0.721445	0.174455	-0.915301	0.0323244	Simple_repeat	Simple_repeat
_CGGAA_n	-0.136438	0.993729	-4.40884	0.174995	-0.480529	0.868257	Simple_repeat	Simple_repeat
GSATX	-0.792047	0.132231	-0.759221	0.174995	-1.15187	0.0090302	Satellite	centr
tRNA-Glu-GAG	-1.83387	0.599901	-4.65801	0.176568	-2.14453	0.404032	tRNA	tRNA
MER65D	0.09874	0.838797	0.29508	0.180555	0.300242	0.100908	LTR	ERV1
MER65-int	-0.590054	3.49606e-08	0.208414	0.182023	-0.412005	0.000206327	LTR	ERV1
U3	-0.0273316	0.991163	0.364842	0.185327	0.00937679	0.993923	snRNA	snRNA
PRIMA4-int	-0.0689829	0.883568	0.232084	0.185327	0.221506	0.135429	LTR	ERV1
UCON26	-0.0813495	0.877814	0.267502	0.187141	0.499448	0.000397458	Unknown	Unknown
HSMAR1	-0.139746	0.422297	0.181482	0.187141	-0.0975506	0.511306	DNA	TcMar-Mariner
MER44A	-0.000745704	1	0.178955	0.187141	0.08176	0.583405	DNA	TcMar-Tigger
MLT1E	-0.00685636	1	0.249241	0.192126	0.158771	0.397089	LTR	ERVL-MaLR
MER102a	0.0531405	0.925159	0.221672	0.192607	0.423586	0.000387725	DNA	hAT-Charlie
X6A_LINE	-0.151315	0.760311	0.343315	0.192607	0.312929	0.170364	LINE	CR1
HERV1_LTRd	0.434328	0.777307	1.01955	0.194495	1.61808	0.00295114	LTR	ERV1
MER57-int	0.0236311	0.991163	0.311085	0.19556	0.464266	0.0093016	LTR	ERV1
MER9a1	-0.186899	0.620203	-0.326356	0.19556	-0.222997	0.34978	LTR	ERVK
Charlie1b	0.0453178	0.915374	0.179396	0.195904	0.190467	0.0952829	DNA	hAT-Charlie
_TTAGGC_n	0.138582	0.838797	-0.482903	0.195904	-0.50594	0.0986801	Simple_repeat	Simple_repeat
GSAT	-0.810236	0.892567	2.3441	0.199107	2.89875	0.0393	Satellite	centr
LTR16B2	-0.0498346	0.899648	-0.178957	0.200935	-0.269874	0.00999486	LTR	ERVL
Arthur1C	0.0834067	0.896114	-0.298837	0.200935	-0.288568	0.143142	DNA	hAT-Tip100
HERV1_I-int	0.63577	0.0999713	-0.531141	0.200935	0.49974	0.149836	LTR	ERV1
LTR35B	-0.0170077	1	-0.437265	0.200935	-0.166199	0.666789	LTR	ERV1
MER34A1	-0.0437059	0.961246	-0.269011	0.200935	-0.0887392	0.729219	LTR	ERV1
LTR50	-0.0258242	0.961246	0.161689	0.200935	-0.0324056	0.862339	LTR	ERVL
MamRep1161	-0.0451567	0.908909	0.169043	0.209158	0.149307	0.202351	DNA	TcMar
MERX	0.0375451	0.986367	-0.410386	0.213038	-0.0944955	0.827516	DNA	TcMar-Tigger
Kanga1a	-0.144049	0.599901	-0.236057	0.219186	-0.146516	0.438828	DNA	TcMar-Tc2
_CTCA_n	-0.0769423	0.911928	-0.294761	0.220912	-0.317338	0.102442	Simple_repeat	Simple_repeat
BLACKJACK	0.161883	0.411652	0.200684	0.221904	0.0358955	0.891404	DNA	hAT-Blackjack
UCON28c	0.721861	0.613867	1.18652	0.221904	0.963986	0.27359	Unknown	Unknown
_CACTG_n	-0.00636633	1	-1.31929	0.222118	0.0633978	0.984038	Simple_repeat	Simple_repeat
Charlie15a	-0.0283088	0.966492	0.191893	0.222119	0.0907115	0.589439	DNA	hAT-Charlie
UCON2	0.0581428	0.961246	0.363645	0.222692	0.15299	0.652004	Unknown	Unknown
MER58C	0.19161	0.209453	0.178975	0.222692	-0.0227292	0.934957	DNA	hAT-Charlie
Tigger4b	-0.102507	0.623237	0.170288	0.224957	0.0653461	0.687347	DNA	TcMar-Tigger
_AGTTG_n	0.423006	0.961246	-4.42006	0.226154	-0.495518	0.897838	Simple_repeat	Simple_repeat
_TTAGG_n	-0.46505	0.51431	-0.727063	0.226154	-0.0704589	0.95247	Simple_repeat	Simple_repeat
MER85	-0.0375246	0.95003	0.184643	0.227979	0.0679723	0.704452	DNA	PiggyBac
DNA1_Mam	-0.177577	0.800438	-0.471779	0.230272	0.392294	0.206088	DNA	TcMar
LTR70	0.10771	0.892331	0.351915	0.230272	0.29672	0.251213	LTR	ERV1
MER65A	0.0832814	0.810152	0.210938	0.231282	-0.0303816	0.920104	LTR	ERV1
Tigger11a	0.022496	0.988826	-0.258402	0.231758	-0.279537	0.108697	DNA	TcMar-Tigger
Charlie1	0.06175	0.896114	0.202287	0.232701	0.159996	0.296191	DNA	hAT-Charlie
L1MB7	-0.476623	0.000777627	-0.230182	0.234189	-0.501412	0.000129271	LINE	L1
LSAU	-0.963302	6.93663e-06	-0.380264	0.234643	-0.762188	0.00104549	Satellite	Satellite
tRNA-Val-GTY	-0.546518	0.703808	-1.21103	0.234643	-1.14663	0.177076	tRNA	tRNA
MER70C	0.472162	0.0794963	0.377002	0.234643	0.293877	0.309722	LTR	ERVL
MLT1H-int	-0.179651	0.494689	-0.236557	0.248835	-0.333184	0.0307809	LTR	ERVL-MaLR
MER45B	-0.20216	0.379198	-0.232845	0.248835	-0.222997	0.186369	DNA	hAT-Tip100
_CATTA_n	-0.599789	2.83709e-05	0.239819	0.248835	0.194235	0.294293	Simple_repeat	Simple_repeat
MLT1C-int	0.108448	0.753789	-0.229536	0.248835	-0.150669	0.433875	LTR	ERVL-MaLR
LTR8	0.0533951	0.88249	0.160805	0.248835	0.0162292	0.959687	LTR	ERV1
Charlie19a	0.0209917	0.975577	-0.175959	0.249844	-0.0941075	0.544069	DNA	hAT-Charlie
_ATAAG_n	-1.24889	0.800438	-4.39105	0.252989	0.251176	0.965506	Simple_repeat	Simple_repeat
UCON24	-2.27498	0.570603	-4.39108	0.252989	-0.0650577	0.995594	Unknown	Unknown
MER58A	0.075668	0.82914	0.191826	0.252989	0.251681	0.0486042	DNA	hAT-Charlie
_TCCCG_n	-0.128703	0.968053	-1.12978	0.252989	-0.416079	0.67789	Simple_repeat	Simple_repeat
HERV1_LTRa	0.111521	0.928868	-0.472153	0.252989	0.163512	0.719517	LTR	ERV1
MER34C2	0.140103	0.571516	0.204299	0.257242	0.237229	0.093493	LTR	ERV1
_CTCG_n	-0.129331	0.915374	0.464143	0.263106	0.166219	0.738682	Simple_repeat	Simple_repeat
LTR5B	-0.0272356	0.961246	-0.14528	0.269354	-0.12613	0.262792	LTR	ERVK
L1PBb	0.0184794	0.993729	0.291424	0.273434	0.484925	0.00867313	LINE	L1
LTR81	-0.175331	0.796396	0.400119	0.275898	0.487974	0.0768913	LTR	Gypsy
_TCTTG_n	0.0811871	0.991467	-1.25748	0.277179	-0.104157	0.962377	Simple_repeat	Simple_repeat
UCON4	-0.0825092	0.935854	0.329749	0.277179	0.321885	0.196598	Unknown	Unknown
tRNA-Phe-TTY	-0.132253	0.973043	0.961639	0.277983	-0.119714	0.952796	tRNA	tRNA
L1M2c	-0.0532457	0.935556	-0.215812	0.277983	-0.292985	0.0480198	LINE	L1
_CG_n	-0.254884	0.672635	-0.448604	0.292438	-0.452127	0.184395	Simple_repeat	Simple_repeat
L1MCc	0.110258	0.531133	0.144008	0.292464	0.18941	0.0602736	LINE	L1
MER41A	0.0300743	0.961246	-0.155999	0.292588	-0.184915	0.102442	LTR	ERV1
LTR10A	0.305135	0.191889	-0.266706	0.29262	-0.0102733	0.990135	LTR	ERV1
_CACAT_n	0.366114	0.726092	-0.86417	0.294661	0.987144	0.0319013	Simple_repeat	Simple_repeat
_CCGAG_n	0.726129	0.00759656	0.437054	0.294661	0.237098	0.582194	Simple_repeat	Simple_repeat
MLT1-int	0.288842	0.516608	0.387715	0.295683	0.547364	0.036049	LTR	ERVL-MaLR
_TTTTG_n	-0.513631	3.5433e-05	-0.196551	0.299639	-0.228065	0.116922	Simple_repeat	Simple_repeat
Charlie1b_Mars	-2.53174	0.287533	-2.67544	0.300851	0.213137	0.959687	DNA	hAT-Charlie
HY4	0.131153	0.8686	0.361692	0.30517	0.280783	0.36776	scRNA	scRNA
MER97d	-0.518717	0.0445236	-0.340286	0.308835	-0.220716	0.482171	DNA	hAT-Tip100
_CATAA_n	0.135129	0.897484	-0.500113	0.309639	-0.275651	0.544069	Simple_repeat	Simple_repeat
_GGGAGA_n	-0.16326	0.721502	-0.305949	0.31035	-0.0896606	0.794663	Simple_repeat	Simple_repeat
AluSq	-0.0981943	0.782526	-0.200381	0.312827	-0.1971	0.217248	SINE	Alu
Charlie13a	-0.0682725	0.918816	-0.243941	0.317239	-0.214033	0.29061	DNA	hAT-Charlie
L1PREC2	0.0217528	0.986367	0.211388	0.324401	0.399268	0.00486051	LINE	L1
_CCTG_n	-0.0472252	0.915374	-0.163563	0.324493	-0.254913	0.0279789	Simple_repeat	Simple_repeat
MER68B	-0.110384	0.760311	-0.210862	0.328639	-0.304187	0.0464244	LTR	ERVL
LTR3A	0.0481418	0.90279	-0.155129	0.331003	-0.183459	0.122005	LTR	ERVK
MER63C	-0.0546664	0.90279	0.169972	0.331167	-0.11302	0.501685	DNA	hAT-Blackjack
HERV-Fc1_LTR3	0.833388	0.931423	2.85003	0.332204	1.0942	0.768953	LTR	ERV1
LTR7A	0.306832	0.550473	0.424034	0.332332	0.618194	0.0355894	LTR	ERV1
_CCCG_n	-0.218321	0.90279	-0.790397	0.332332	-0.790453	0.214514	Simple_repeat	Simple_repeat
_GAA_n	-0.256143	0.0611429	0.163743	0.332889	-0.111391	0.486452	Simple_repeat	Simple_repeat
_CATG_n	-0.502734	0.141255	-0.373399	0.33346	-0.78137	0.0017758	Simple_repeat	Simple_repeat
LTR14B	0.132738	0.683738	0.217398	0.334836	0.294529	0.0670447	LTR	ERVK
UCON23	-0.123473	0.791882	0.256332	0.338164	-0.124005	0.655335	DNA?	DNA?
LTR14A	0.0127406	1	-0.334387	0.341752	-0.463751	0.064838	LTR	ERVK
MamRep434	0.016543	0.986367	0.155108	0.341752	-0.0774135	0.636075	DNA	TcMar-Tigger
UCON17	0.510429	0.961246	-4.12669	0.341931	0.939078	0.771595	Unknown	Unknown
LTR10C	-0.0455525	0.95003	-0.19675	0.343788	0.0505765	0.845467	LTR	ERV1
HAL1b	-0.0898936	0.777307	0.173077	0.343788	0.21124	0.118774	LINE	L1
HERV9-int	0.192513	0.371664	0.190376	0.343788	0.180109	0.265432	LTR	ERV1
HERV15-int	0.410508	0.350294	0.407288	0.343788	0.384895	0.267284	LTR	ERV1
LTR40b	-0.0781745	0.808869	-0.173628	0.343788	-0.111757	0.516928	LTR	ERVL
MER61E	0.852866	1.74003e-06	-0.293397	0.346125	-0.433563	0.0482719	LTR	ERV1
MLT1G1	-0.0864515	0.678942	-0.136363	0.348203	-0.147193	0.189398	LTR	ERVL-MaLR
_TAGTG_n	-0.837239	0.777992	-1.83472	0.352506	-1.58488	0.313095	Simple_repeat	Simple_repeat
_CGATA_n	-0.613395	0.966926	-4.90875	0.355192	-1.46747	0.759177	Simple_repeat	Simple_repeat
AT_rich	-0.0357216	0.966492	0.206775	0.358745	0.137877	0.514135	Low_complexity	Low_complexity
L1HS	-0.141049	0.760311	0.256975	0.358923	0.63475	0.000200836	LINE	L1
MamGypLTR1d	0.273425	0.308637	0.250427	0.359469	-0.22285	0.340514	LTR	Gypsy
L1MCb	0.0860282	0.79346	0.177091	0.361066	0.135416	0.431836	LINE	L1
MLT1H2	-0.27207	0.0618269	0.166944	0.36135	0.227346	0.0806987	LTR	ERVL-MaLR
LTR22B	0.140582	0.814719	-0.317844	0.36135	-0.195565	0.542747	LTR	ERVK
MER34C	0.311014	0.461737	-0.360412	0.36135	-0.115962	0.792889	LTR	ERV1
LTR12C	-0.0833594	0.808869	-0.174568	0.362112	-0.179318	0.230924	LTR	ERV1
X5A_LINE	-0.025934	0.995788	0.388356	0.362583	-0.0169858	0.990135	LINE	CR1
LTR54B	0.120528	0.718636	0.201904	0.363087	0.202827	0.244784	LTR	ERV1
LTR58	-0.0938962	0.911928	0.292545	0.364786	0.345783	0.149836	LTR	ERV1
Eulor7	-1.78598	0.782526	-4.38718	0.364786	-4.38718	0.244784	DNA?	DNA?
_CAGC_n	0.665379	0.147178	0.494332	0.364786	0.280618	0.595386	Simple_repeat	Simple_repeat
MER66B	0.0939837	0.726092	0.159398	0.369697	0.334742	0.00256135	LTR	ERV1
MER34-int	0.215039	0.544423	0.262655	0.370073	0.240091	0.313095	LTR	ERV1
Eulor9C	0.0351144	0.986367	-0.35937	0.370073	-0.319117	0.326319	DNA	DNA
LTR21A	-0.237026	0.317429	-0.216033	0.370743	-0.54224	0.00029898	LTR	ERV1
HERV1_LTRc	-0.40621	0.375865	-0.432057	0.370743	-0.248402	0.572671	LTR	ERV1
L1M3a	-0.0304263	0.966492	0.183395	0.370743	0.0874883	0.676496	LINE	L1
_CGATG_n	0	1	4.01832	0.370743	0	1	Simple_repeat	Simple_repeat
X5B_LINE	-0.064438	0.961246	0.286296	0.37459	0.0671458	0.878118	LINE	CR1
_CGCGG_n	0.299235	0.620447	0.434168	0.375859	0.478858	0.191623	Simple_repeat	Simple_repeat
LTR41	-0.0191294	0.975577	-0.133021	0.375859	-0.124489	0.307219	LTR	ERVL
_AGGTG_n	-0.272673	0.570603	-0.375189	0.377531	-0.0325364	0.972623	Simple_repeat	Simple_repeat
MamRep488	-0.120838	0.842167	-0.283321	0.378421	0.288306	0.240881	DNA	hAT
_TTTAA_n	0.05781	0.985048	-0.537127	0.380203	-0.282785	0.619822	Simple_repeat	Simple_repeat
MER5C	0.121653	0.592398	0.156269	0.383107	0.179527	0.181829	DNA	hAT-Charlie
_CTAA_n	0.124289	0.961246	-0.738469	0.385793	0.440739	0.50359	Simple_repeat	Simple_repeat
MER5C1	-0.0422527	0.961246	0.210161	0.3938	0.0712602	0.794663	DNA	hAT-Charlie
_ATTAG_n	0.534869	0.734025	0.891924	0.393801	0.233827	0.868257	Simple_repeat	Simple_repeat
_TTAGGG_n	-0.351656	0.273986	-0.309102	0.393801	-0.280323	0.336547	Simple_repeat	Simple_repeat
MER34A	-0.0913066	0.780125	-0.17076	0.393801	-0.153995	0.345488	LTR	ERV1
tRNA-Tyr-TAC	-0.712145	0.760311	-1.52092	0.393801	0.568444	0.662479	tRNA	tRNA
U14	0.0274368	0.993263	0.317756	0.398512	0.050478	0.938411	snRNA	snRNA
LTR5A	-0.135506	0.375865	-0.126627	0.398512	-0.199265	0.0488972	LTR	ERVK
UCON22	-0.380956	0.472045	0.390151	0.400644	0.549369	0.0804034	Unknown	Unknown
LTR12E	-0.113223	0.796396	-0.224855	0.404336	-0.189051	0.396506	LTR	ERV1
Eulor8	0.421979	0.683738	0.646407	0.404485	0.232034	0.793891	DNA	TcMar?
LTR16E2	0.081122	0.75673	0.137397	0.406582	-0.00732835	0.988155	LTR	ERVL
_C_n	0.044259	0.977363	0.332913	0.406582	0.012905	0.993117	Simple_repeat	Simple_repeat
_AGGGGG_n	-0.343489	0.51431	-0.416208	0.406582	-0.649732	0.0637626	Simple_repeat	Simple_repeat
tRNA-Gly-GGG	0.681924	0.815877	-1.77235	0.406582	1.019	0.504563	tRNA	tRNA
Eulor1	-0.0396584	1	0.986136	0.413177	0.152179	0.945884	DNA	DNA
Charlie3	0.0114719	0.996165	-0.167167	0.414559	-0.217027	0.135429	DNA	hAT-Charlie
MER97b	-0.0659375	0.961246	-0.305332	0.414606	-0.27281	0.364028	DNA	hAT-Tip100
_CAATC_n	-3.70697	0.333411	-3.70697	0.414606	-0.311194	0.962377	Simple_repeat	Simple_repeat
Charlie10a	-0.171765	0.635019	-0.229002	0.419628	-0.30378	0.129829	DNA	hAT-Charlie
MER6A	0.246971	0.0568969	-0.143025	0.419628	-0.0984047	0.529456	DNA	TcMar-Tigger
LTR52-int	0.02572	0.9925	-0.277397	0.42305	-0.389641	0.103508	LTR	ERVL
LTR89	-0.00139676	1	0.148595	0.423958	0.0423355	0.848217	LTR	ERVL?
MamGypLTR1c	-0.0994672	0.808869	0.194857	0.423958	-0.044055	0.897334	LTR	Gypsy
polypurine	-0.926817	1.99067e-17	-0.164247	0.423958	-0.675571	1.19027e-09	Low_complexity	Low_complexity
LTR39-int	0.10788	0.936158	0.377515	0.423958	0.283137	0.502865	LTR	ERV1
_CCCTAG_n	0.130164	0.701721	-0.196312	0.423958	-0.124544	0.574553	Simple_repeat	Simple_repeat
LTR16D1	0.100046	0.911719	0.296855	0.423958	-0.124481	0.761937	LTR	ERVL
_CAGAA_n	0.0402044	1	-0.788747	0.425875	-0.915494	0.215202	Simple_repeat	Simple_repeat
_CAGTA_n	-0.316999	0.760311	-0.582792	0.426305	-1.23234	0.0141067	Simple_repeat	Simple_repeat
LTR7C	0.228271	0.223914	0.16793	0.428423	0.236768	0.105066	LTR	ERV1
_ACCTG_n	3.41439	0.550181	3.91861	0.428423	5.04241	0.175002	Simple_repeat	Simple_repeat
Charlie2b	-0.0134084	0.990017	0.123018	0.428423	0.136048	0.244784	DNA	hAT-Charlie
UCON27	0.225835	0.621515	0.304967	0.428423	-0.364928	0.253575	Unknown	Unknown
HY5	0.400201	0.350294	-0.430736	0.428423	-0.30456	0.516928	scRNA	scRNA
MER68-int	-0.347579	0.0135315	0.161682	0.428423	-0.0964553	0.611138	LTR	ERVL
L1MDa	0.0585986	0.908909	-0.161487	0.428423	-0.0676653	0.752425	LINE	L1
Tigger1a_Mars	-0.132888	0.951702	-0.594841	0.428423	-0.200966	0.792889	DNA	TcMar-Tigger
Charlie14a	-0.102513	0.798538	-0.196123	0.429717	-0.283607	0.0996872	DNA	hAT-Charlie
LTR31	-0.161318	0.737653	-0.260217	0.436884	-0.0786732	0.836119	LTR	ERV1
U8	-0.449826	0.760311	0.682517	0.443101	1.00168	0.080325	snRNA	snRNA
MER45R	0.15901	0.721951	-0.251372	0.444829	-0.0482359	0.917116	DNA	hAT-Tip100
_CCCCAG_n	-0.232344	0.2214	-0.163349	0.444829	-0.397011	0.00167742	Simple_repeat	Simple_repeat
_GA_n	-0.197172	0.264947	-0.148386	0.444829	-0.308615	0.00999486	Simple_repeat	Simple_repeat
HERVKC4-int	-0.515609	0.106907	-0.331844	0.446614	-0.164138	0.68818	LTR	ERVK
MLT1N2	-0.0973138	0.637235	-0.123067	0.448473	-0.0285137	0.897334	LTR	ERVL-MaLR
LTR26	-0.145895	0.859489	0.315817	0.448473	0.726129	0.00313848	LTR	ERV1
_CCCGA_n	-0.159585	0.784179	-0.291689	0.448473	-0.157375	0.661991	Simple_repeat	Simple_repeat
MER4D0	-0.0665092	0.892331	0.162141	0.450169	-0.165523	0.327213	LTR	ERV1
ERV3-16A3_LTR	-0.0646572	0.907268	-0.178348	0.450169	0.139605	0.484538	LTR	ERVL
HERV-Fc2-int	0.344322	0.892567	0.845875	0.450169	0.171993	0.920104	LTR	ERV1
MER21-int	-0.329464	0.0112485	-0.146986	0.450403	-0.603872	1.0924e-08	LTR	ERVL
MER1B	-0.140928	0.597929	-0.162769	0.452724	-0.126926	0.50359	DNA	hAT-Charlie
LTR7	0.401434	2.82194e-05	0.126224	0.45287	0.214896	0.0481193	LTR	ERV1
PRIMAX-int	0.105774	0.897096	0.268931	0.45287	0.134534	0.703902	LTR	ERV1
LTR51	0.136376	0.842656	-0.29358	0.454125	-0.111538	0.784596	LTR	ERV1
FordPrefect_a	-0.637432	0.0752122	-0.365763	0.455611	-0.0695456	0.918448	DNA	hAT-Tip100
Ricksha_c	0.124027	0.726092	0.185665	0.457879	0.150455	0.483339	DNA	MuDR
_GGATG_n	-0.177331	0.842656	-0.374062	0.458152	-0.222015	0.626888	Simple_repeat	Simple_repeat
LFSINE_Vert	-0.356002	0.0524027	0.183613	0.460294	0.0528947	0.858827	SINE	SINE
MER5B	0.00571724	1	0.152809	0.463087	0.0090283	0.988155	DNA	hAT-Charlie
_CGAAT_n	0	1	3.91422	0.465348	4.27033	0.296191	Simple_repeat	Simple_repeat
MER107	0.309189	0.410423	0.272696	0.466404	0.702252	0.00103019	DNA	DNA
MER57D	-0.0759666	0.932846	-0.232427	0.466404	-0.455723	0.0242602	LTR	ERV1
Arthur1	-0.0992624	0.674691	0.131552	0.466404	0.243414	0.0319013	DNA	hAT-Tip100
_TTAG_n	0.24943	0.707423	-0.4262	0.466404	-0.617174	0.131738	Simple_repeat	Simple_repeat
_ATGTG_n	-0.529436	0.790264	0.836057	0.466404	-0.266453	0.865261	Simple_repeat	Simple_repeat
MSTA-int	0.031184	0.961246	0.138289	0.466843	0.135702	0.363007	LTR	ERVL-MaLR
PrimLTR79	0.128198	0.838797	0.26032	0.466843	-0.256102	0.386453	LTR	ERV1
MER21A	0.0484327	0.90279	-0.123235	0.466843	-0.0479498	0.788186	LTR	ERVL
tRNA-Ser-TCA	0	1	3.51342	0.468785	0	1	tRNA	tRNA
_CGAAA_n	3.28841	0.53251	3.39888	0.47042	3.36067	0.358595	Simple_repeat	Simple_repeat
ERVL-int	-0.00887253	1	0.137243	0.476048	0.0172805	0.963539	LTR	ERVL
Looper	0.06805	0.935556	0.205079	0.479203	0.259528	0.202351	DNA	PiggyBac
LTR27B	0.368421	0.239928	0.256178	0.483029	0.379214	0.116922	LTR	ERV1
MER57E2	-0.0234692	1	0.554008	0.483029	0.372197	0.595386	LTR	ERV1
MER84-int	0.0613472	0.961246	-0.258883	0.490359	-0.199197	0.525795	LTR	ERV1
LTR81B	-0.348118	0.268605	-0.251945	0.49215	0.0584163	0.90016	LTR	Gypsy
Tigger1a_Art	-0.0762796	0.916669	-0.213284	0.49215	-0.0442153	0.917116	DNA	TcMar-Tigger
_CCGGA_n	0.142539	0.977363	-1.01485	0.492151	-0.446145	0.748514	Simple_repeat	Simple_repeat
tRNA-Arg-CGA_	0	1	3.3948	0.492306	0	1	tRNA	tRNA
Tigger12	-0.222344	0.0414695	0.107492	0.492448	-0.0672967	0.630285	DNA	TcMar-Tigger
MER11B	0.192407	0.51431	0.184661	0.493085	2.07556	6.72875e-57	LTR	ERVK
LTR12B	0.342879	0.129059	0.204471	0.493238	0.146617	0.567087	LTR	ERV1
L1P4d	-0.0618719	0.961246	-0.256982	0.499345	-1.0069	6.88444e-07	LINE	L1
_TTTTTA_n	0.247793	0.440301	0.219971	0.499345	0.52231	0.00502136	Simple_repeat	Simple_repeat
MER34B	0.202611	0.40785	-0.174535	0.499345	-0.399182	0.0090302	LTR	ERV1
MLT1G-int	-0.0456362	0.967982	-0.241608	0.499345	-0.4963	0.0238066	LTR	ERVL-MaLR
Eulor2C	-0.152295	0.986367	1.08468	0.499345	1.11662	0.349395	DNA?	DNA?
tRNA-Met	0.0756781	0.961246	0.327596	0.499345	-0.136623	0.794663	tRNA	tRNA
UCON29	0.069542	0.917557	0.188386	0.50795	0.393873	0.0184983	DNA	PiggyBac?
MER50-int	-0.0208398	0.991163	0.183238	0.50795	0.10823	0.662479	LTR	ERV1
REP522	0.338941	0.376109	-0.320271	0.50836	-0.0413941	0.960768	Satellite	telo
UCON19	0.333317	0.977363	1.94165	0.508361	1.13067	0.692504	Unknown	Unknown
L1M3	-0.079427	0.79395	-0.131342	0.508361	-0.0723617	0.692669	LINE	L1
MER51B	-0.162065	0.530637	-0.15957	0.509409	-0.20856	0.210555	LTR	ERV1
_TACTG_n	-0.778702	0.790264	-1.3903	0.509409	-0.58462	0.760745	Simple_repeat	Simple_repeat
MSTB2	0.0382431	0.935854	0.112107	0.513116	0.167245	0.135429	LTR	ERVL-MaLR
MER66-int	0.401855	0.0328338	0.186483	0.514766	0.483629	0.00218082	LTR	ERV1
HSMAR2	-0.0293889	0.961246	-0.11957	0.521732	-0.174337	0.157153	DNA	TcMar-Mariner
_CATTT_n	-0.188563	0.830287	-0.34225	0.521733	0.0479166	0.960768	Simple_repeat	Simple_repeat
_CGGGG_n	-0.244933	0.279075	-0.171395	0.521958	-0.429341	0.00502136	Simple_repeat	Simple_repeat
LTR40a	-0.00331886	1	-0.133321	0.521958	-0.0809575	0.661112	LTR	ERVL
SVA_C	0.0360256	0.951225	0.120158	0.528354	0.382895	0.000138089	Other	Other
MER4A1	0.0525068	0.892331	0.113681	0.528354	0.299078	0.00258047	LTR	ERV1
LTR6A	0.194221	0.623237	0.217159	0.528354	0.312151	0.169447	LTR	ERV1
LTR28	0.0467255	0.961246	-0.170786	0.528354	-0.240063	0.182608	LTR	ERV1
_CTA_n	0.0365492	0.986367	0.257068	0.528354	0.212195	0.524494	Simple_repeat	Simple_repeat
LTR10D	-0.0547784	0.973044	0.294815	0.528354	0.228847	0.544069	LTR	ERV1
_CACGA_n	0.115848	0.993729	-1.60747	0.528354	-0.751603	0.719517	Simple_repeat	Simple_repeat
L1PA14	-0.126636	0.489131	0.111526	0.530648	0.22733	0.0312633	LINE	L1
MER115	0.0305903	0.961246	-0.112484	0.53251	-0.139852	0.260843	DNA	hAT-Tip100
LTR38C	0.189186	0.760311	0.286156	0.53251	-0.275924	0.482171	LTR	ERV1
LTR33C	0.144472	0.599901	0.153648	0.53251	0.130289	0.516863	LTR	ERVL
SVA_B	0.0245761	0.966492	-0.113054	0.53251	0.0417423	0.822929	Other	Other
_TTCGGG_n	-0.166775	0.986367	-1.28848	0.53251	-0.313783	0.893831	Simple_repeat	Simple_repeat
G-rich	-0.229678	0.254235	-0.149194	0.536985	-0.183222	0.27359	Low_complexity	Low_complexity
L1PA8	-0.122826	0.648514	0.136864	0.537243	0.114788	0.524494	LINE	L1
L1M4	-0.00640831	1	-0.131872	0.537243	-0.0814588	0.662479	LINE	L1
Tigger12c	0.105945	0.715059	-0.137182	0.539516	0.0998148	0.584228	DNA	TcMar-Tigger
MER70-int	0.0583424	0.957507	0.200756	0.539516	-0.0359111	0.945884	LTR	ERVL
Tigger4a	-0.165571	0.379198	-0.12593	0.53984	-0.0199925	0.954198	DNA	TcMar-Tigger
LTR16A1	0.0276954	0.961246	0.109055	0.542573	-0.172116	0.135283	LTR	ERVL
_TTCCG_n	-0.190784	0.982683	-1.38822	0.542573	-1.44182	0.394665	Simple_repeat	Simple_repeat
LTR47A	-0.0470789	0.936158	-0.13663	0.542573	-0.0977453	0.597468	LTR	ERVL
LTR37A	-0.191438	0.379198	-0.147423	0.545823	0.0136901	0.982067	LTR	ERV1
ERV3-16A3_I-int	-0.011097	0.993729	0.118073	0.545823	0.161708	0.214126	LTR	ERVL
L1PBa1	-0.262096	0.0602561	-0.122163	0.552181	-0.277707	0.0191894	LINE	L1
LTR3B	-0.149775	0.892331	0.312603	0.552181	0.59826	0.0515057	LTR	ERVK
HERVK-int	-0.241411	0.132231	-0.1311	0.552181	-0.23596	0.0783707	LTR	ERVK
_ACATG_n	-1.53038	0.243353	-0.951797	0.552181	-0.79154	0.527501	Simple_repeat	Simple_repeat
tRNA-His-CAY_	0.794089	0.595714	0.839375	0.552181	-0.642169	0.661112	tRNA	tRNA
tRNA-Met-i	-0.275663	0.951185	-0.979451	0.552181	-0.416166	0.780571	tRNA	tRNA
Tigger3c	-0.0274253	0.961246	-0.108752	0.552181	-0.0139374	0.968627	DNA	TcMar-Tigger
_TCCG_n	-0.203327	0.673486	-0.24637	0.552181	-0.00334445	1	Simple_repeat	Simple_repeat
LTR12D	0.25085	0.216847	0.154302	0.552725	0.239199	0.14811	LTR	ERV1
Tigger16b	-0.117572	0.587877	-0.115613	0.554383	0.0298366	0.90016	DNA	TcMar-Tigger
LTR16B	0.232608	0.350294	-0.169718	0.560075	-0.193056	0.348601	LTR	ERVL
AluJr4	0.0635527	0.892567	-0.130631	0.566041	-0.0662387	0.7529	SINE	Alu
MER6B	0.0061679	1	-0.141313	0.568443	-0.307886	0.0307809	DNA	TcMar-Tigger
_TTTCG_n	-3.18303	0.51431	-3.18303	0.568443	-0.681604	0.906861	Simple_repeat	Simple_repeat
_TTGGGG_n	0.0246453	0.993729	-0.247156	0.571941	-0.327767	0.25581	Simple_repeat	Simple_repeat
AmnSINE2	0.270094	0.440301	0.220126	0.574765	0.203285	0.502865	SINE	Deu
_GACTG_n	-3.16037	0.516608	-3.16037	0.579303	-3.16037	0.442732	Simple_repeat	Simple_repeat
MLT1K-int	0.227076	0.593022	0.234413	0.584537	0.0342187	0.964071	LTR	ERVL-MaLR
_CATAT_n	-0.301227	0.812103	-0.524412	0.584537	0.300369	0.675801	Simple_repeat	Simple_repeat
Charlie23a	0.0314776	0.966492	0.137165	0.587798	0.0311061	0.920104	DNA	hAT-Charlie
MER57B2	0.0442253	0.961246	0.152462	0.587798	0.0337481	0.923879	LTR	ERV1
LTR10E	-0.0194351	0.993729	-0.175913	0.587798	0.00147527	1	LTR	ERV1
LTR75	0.140624	0.673486	-0.161336	0.587798	-0.359601	0.0312633	LTR	ERVL
MER54B	-0.0127257	1	-0.226712	0.587798	0.361431	0.135601	LTR	ERVL
L1P3	-0.115795	0.662495	0.123977	0.587798	-0.164457	0.267284	LINE	L1
_ATTTG_n	-0.072401	0.999419	0.836945	0.588799	0.77195	0.514598	Simple_repeat	Simple_repeat
LTR72B	0.0825564	0.949589	-0.264795	0.588799	-0.203157	0.590179	LTR	ERV1
Tigger6b	0.249566	0.537989	-0.228987	0.590502	-0.100736	0.794663	DNA	TcMar-Tigger
L1ME3D	0.0652715	0.808869	0.0991159	0.590502	0.211572	0.0409994	LINE	L1
L1P2	0.0460873	0.90279	0.0994537	0.590502	0.175294	0.106339	LINE	L1
LTR2B	0.234371	0.32057	0.155589	0.590502	-0.190389	0.336229	LTR	ERV1
tRNA-Ile-ATC	-0.255495	0.977363	-1.83805	0.590502	-1.88493	0.448482	tRNA	tRNA
Tigger14a	0.0881838	0.715059	0.104571	0.590502	-0.0995692	0.504121	DNA	TcMar-Tigger
Eulor5B	0.301923	0.974228	1.45927	0.590502	0.866049	0.722392	DNA?	DNA?
L1MDb	0.00791723	1	0.146723	0.591143	-0.0566979	0.836119	LINE	L1
_TTAAA_n	0.346356	0.383672	0.271659	0.592048	0.670603	0.0082589	Simple_repeat	Simple_repeat
_CACCC_n	-0.429785	0.000149637	-0.117964	0.592402	-0.727127	1.75371e-12	Simple_repeat	Simple_repeat
HSATI	1.18201	0.500278	1.01237	0.592402	1.15092	0.376207	Satellite	Satellite
_TAAG_n	-0.243189	0.661109	0.25573	0.592402	0.0976465	0.840176	Simple_repeat	Simple_repeat
MLT2E	-0.1208	0.908909	-0.269146	0.592402	-0.083947	0.878722	LTR	ERVL
D20S16	0.0539707	0.951225	0.164188	0.598857	0.325045	0.0653803	Satellite	Satellite
_CACAG_n	-0.744225	6.93663e-06	-0.173522	0.599858	-0.560255	0.000969994	Simple_repeat	Simple_repeat
MER11C	0.214887	0.060705	0.0943333	0.599858	-0.116218	0.343355	LTR	ERVK
MER132	1.38014	0.790189	1.93266	0.599858	1.63995	0.5638	DNA	TcMar
AluYk12	-0.0695326	0.917557	-0.162165	0.599858	0.0285223	0.952796	SINE	Alu
LTR10B1	-0.235562	0.549047	0.203713	0.599858	0.0329701	0.960768	LTR	ERV1
Tigger2b_Pri	0.0597324	0.8686	-0.108005	0.603408	0.0387771	0.854483	DNA	TcMar-Tigger
_CTAAT_n	1.21548	0.545502	1.10784	0.604072	0.237732	0.946881	Simple_repeat	Simple_repeat
PABL_A-int	0.0490546	0.961246	-0.170658	0.604072	-0.0310771	0.951618	LTR	ERV1
LTR33A	0.035447	0.94253	-0.0956682	0.604072	-0.0114048	0.975802	LTR	ERVL
MamRep1894	-0.251443	0.350294	-0.166817	0.604072	-0.466968	0.00686051	DNA	hAT
tRNA-Leu-CTG	-1.2286	0.384086	-0.906669	0.604072	-2.4491	0.0480198	tRNA	tRNA
MER4B-int	0.0180805	0.986367	0.113535	0.604072	0.24013	0.0497808	LTR	ERV1
MER9a3	-0.0854641	0.777992	-0.116189	0.604072	-0.214202	0.104592	LTR	ERVK
MER41D	0.206509	0.477839	0.163126	0.604072	0.256821	0.184483	LTR	ERV1
tRNA-Tyr-TAT	2.39173	0.209453	1.50357	0.604072	1.90753	0.289247	tRNA	tRNA
MER54A	0.0169671	0.991163	0.127111	0.604072	0.139449	0.43188	LTR	ERVL
MER95	0.134109	0.824906	-0.229171	0.604072	0.199895	0.527501	LTR	ERV
L1PA12	0.0876417	0.706311	0.0993282	0.604072	0.0647708	0.687283	LINE	L1
tRNA-Leu-TTA	2.35255	0.516608	1.98801	0.60426	3.3636	0.120114	tRNA	tRNA
LTR25-int	-0.444392	0.00795854	-0.149483	0.60426	-0.228906	0.210933	LTR	ERV1
T-rich	-0.0993851	0.763818	0.125604	0.60426	0.137384	0.434933	Low_complexity	Low_complexity
MLT1G1-int	-0.207508	0.659045	-0.223158	0.60426	-0.111723	0.771419	LTR	ERVL-MaLR
LTR13A	-0.0475186	0.95003	-0.139522	0.60426	-0.0351302	0.917116	LTR	ERVK
L1ME5	-0.0197124	0.973043	-0.0941916	0.60426	-0.00647844	0.989303	LINE	L1
_TGGG_n	-0.3366	0.129059	-0.163463	0.606092	-0.551258	0.000764538	Simple_repeat	Simple_repeat
LTR27	0.0157768	0.993729	0.144264	0.606092	0.341956	0.0261374	LTR	ERV1
LTR23-int	0.129528	0.852013	0.223406	0.606092	0.386221	0.135283	LTR	ERV1
AluYc3	0.125729	0.683738	0.13517	0.606092	0.204688	0.220098	SINE	Alu
MLT1F-int	0.00585952	1	0.118815	0.606092	0.159229	0.298675	LTR	ERVL-MaLR
Kanga1d	-0.0138341	1	-0.19967	0.606092	-0.156157	0.609904	DNA	TcMar-Tc2
Eulor10	-0.193599	0.966492	-0.990966	0.606092	-0.271528	0.891404	DNA?	DNA?
LTR10F	-0.0518228	0.961246	-0.187217	0.606092	0.0277262	0.964071	LTR	ERV1
MER4C	0.200664	0.190317	0.107865	0.607249	0.15364	0.25914	LTR	ERV1
_CTGGGG_n	0.00437934	1	0.121321	0.610563	0.139704	0.407908	Simple_repeat	Simple_repeat
_CACCT_n	-0.65791	0.0191406	-0.243341	0.610753	-0.436461	0.138207	Simple_repeat	Simple_repeat
MER57E1	0.143888	0.743352	0.173871	0.614895	-0.0519785	0.898855	LTR	ERV1
LTR46-int	0.18964	0.130417	0.0921321	0.614895	-0.0104479	0.978173	LTR	ERV1
_TCCTG_n	-0.0652652	0.961246	-0.22071	0.614895	-0.0135978	0.990135	Simple_repeat	Simple_repeat
MER113	0.0556973	0.874066	-0.0969251	0.61532	-0.131837	0.301803	DNA	hAT-Charlie
MER45A	0.202134	0.229728	-0.10983	0.616992	-0.387919	0.000443483	DNA	hAT-Tip100
LTR17	-0.187998	0.243353	-0.104574	0.616992	-0.190972	0.131738	LTR	ERV1
MER106A	0.106889	0.772646	0.136881	0.616992	0.235608	0.158116	DNA	hAT-Charlie
LTR78B	-0.195858	0.0968551	-0.0885056	0.616992	-0.144298	0.190013	LTR	ERV1
LOR1-int	-0.134563	0.369858	0.0866111	0.616992	0.117351	0.309722	LTR	ERV1
_CGGAG_n	0.288562	0.772646	-0.406133	0.616992	-0.456428	0.438481	Simple_repeat	Simple_repeat
_CTAGG_n	-1.44328	0.132231	-0.690073	0.616992	-0.627079	0.541049	Simple_repeat	Simple_repeat
MER44D	0.079491	0.911928	-0.169271	0.616992	-0.0588231	0.868257	DNA	TcMar-Tigger
ERVL-B4-int	-0.0332353	0.961246	0.11782	0.616992	0.0175209	0.965984	LTR	ERVL
MLT2B4	0.00610527	1	-0.0955576	0.616992	-0.00557311	0.992315	LTR	ERVL
_CCG_n	-0.00183096	1	-0.11631	0.620004	-0.220695	0.113186	Simple_repeat	Simple_repeat
Tigger3	-0.0748658	0.760311	0.0908458	0.620004	0.0849791	0.540737	DNA	TcMar-Tigger
_CAATG_n	-0.225157	0.852902	-0.395568	0.620634	-1.33842	0.00473237	Simple_repeat	Simple_repeat
_TGAA_n	-0.252338	0.249988	0.137904	0.620634	-0.0662747	0.794663	Simple_repeat	Simple_repeat
FAM	-0.0402753	0.982683	0.214484	0.62174	1.52015	2.33469e-14	SINE	Alu
_TTTG_n	-0.163738	0.313947	0.0972217	0.62174	-0.231105	0.0365078	Simple_repeat	Simple_repeat
MER47A	-0.0527054	0.891855	-0.0942036	0.62174	-0.171989	0.13606	DNA	TcMar-Tigger
L1MB3	-0.00491396	1	-0.113111	0.62174	-0.0517056	0.811975	LINE	L1
_CGAGG_n	-0.268288	0.827412	-0.437698	0.625087	0.0219933	0.993117	Simple_repeat	Simple_repeat
MER52-int	0.295627	0.531133	0.238038	0.625087	0.545284	0.0412113	LTR	ERV1
UCON7	0.322743	0.772646	-0.470293	0.625087	-0.579015	0.394254	DNA?	DNA?
_CCTA_n	-0.141788	0.890441	-0.262722	0.625087	-0.295519	0.450853	Simple_repeat	Simple_repeat
X6B_LINE	-0.0442909	0.982569	0.233623	0.625857	0.137712	0.750027	LINE	CR1
_TTATA_n	-0.0583979	0.961246	-0.213787	0.625857	-0.0257026	0.977781	Simple_repeat	Simple_repeat
LTR86A1	-0.0190541	0.991468	-0.138277	0.628185	-0.236957	0.180404	LTR	ERVL
_GTTTG_n	-0.168004	0.78288	-0.234544	0.628185	0.138766	0.728239	Simple_repeat	Simple_repeat
tRNA-Ser-TCA_	0	1	2.61974	0.629008	2.50075	0.534366	tRNA	tRNA
_CTTCG_n	0	1	2.61974	0.629008	2.50075	0.534366	Simple_repeat	Simple_repeat
MLT2F	0.0188402	0.973043	0.0849123	0.631595	0.0403215	0.804694	LTR	ERVL
AluSq10	0.00925189	1	-0.114563	0.634861	-0.0802854	0.68818	SINE	Alu
MER83B	0.159577	0.78288	-0.204385	0.635112	0.0657342	0.893831	LTR	ERV1
_CTTAA_n	0.944618	0.921477	1.97743	0.635112	0.200497	0.985477	Simple_repeat	Simple_repeat
HERVS71-int	-0.0997823	0.715059	-0.107746	0.635112	-0.224028	0.0895471	LTR	ERV1
MER135	0.442087	9.19806e-06	0.0993844	0.635112	-0.201786	0.10362	DNA	DNA
MLT1E-int	0	1	2.53987	0.635112	3.43356	0.358595	LTR	ERVL-MaLR
_TTAAG_n	0	1	2.53987	0.635112	3.35876	0.370839	Simple_repeat	Simple_repeat
AluJr	-0.0396886	0.961246	-0.119868	0.635112	-0.0957161	0.635485	SINE	Alu
_GGAGAA_n	0.240219	0.611112	0.219591	0.635112	-0.1324	0.755781	Simple_repeat	Simple_repeat
LTR41B	0.691648	6.33443e-17	0.0903095	0.635112	-0.0463416	0.790132	LTR	ERVL
_CCGGG_n	0.124404	0.915374	0.263973	0.636263	0.262318	0.529456	Simple_repeat	Simple_repeat
_CACGT_n	0	1	2.53883	0.637103	2.55277	0.529456	Simple_repeat	Simple_repeat
_CTAG_n	0.888206	0.783408	1.10721	0.637301	1.36938	0.394665	Simple_repeat	Simple_repeat
LTR10B	0.240939	0.587877	-0.224307	0.637822	-0.488344	0.0840719	LTR	ERV1
SSU-rRNA_Hsa	-0.382481	0.901462	0.699652	0.638112	3.48043	7.80573e-06	rRNA	rRNA
MER57E3	0.354694	0.309602	0.204824	0.638112	0.236916	0.454852	LTR	ERV1
Charlie10	-0.0876404	0.715059	-0.0929643	0.638112	-0.058006	0.738682	DNA	hAT-Charlie
SAR	0	1	2.53776	0.638112	0	1	Satellite	Satellite
HERVE_a-int	-0.0422717	0.966492	0.164534	0.639675	-0.0717721	0.838946	LTR	ERV1
_TAAAAA_n	0.332331	0.379198	0.216718	0.639675	0.0899765	0.848217	Simple_repeat	Simple_repeat
LTR86A2	-0.0747171	0.937081	-0.181227	0.639675	-0.0584032	0.897334	LTR	ERVL
_TAAAA_n	0.0871024	0.829306	0.125255	0.639675	-0.0168373	0.975802	Simple_repeat	Simple_repeat
_TTCC_n	-0.200589	0.186246	-0.0956274	0.639675	-0.533384	2.31691e-08	Simple_repeat	Simple_repeat
MER99	0.156299	0.715059	-0.166006	0.639675	-0.291265	0.188614	DNA	hAT?
MER50	-0.0556421	0.877707	-0.0919652	0.639675	-0.0508612	0.772156	LTR	ERV1
HAL1-3A_ME	-0.0888229	0.760311	0.101947	0.640157	0.244488	0.0464244	LINE	L1
L1M4c	-0.551011	0.00320437	-0.15547	0.640157	-0.170679	0.501706	LINE	L1
MSR1	0.272454	0.10606	-0.11928	0.640157	-0.127516	0.5124	Satellite	Satellite
MSTB-int	-0.0410585	0.935556	0.0917803	0.640157	-0.0513107	0.772462	LTR	ERVL-MaLR
_TTTTA_n	0.225132	0.367564	0.135855	0.640448	-0.317126	0.0602736	Simple_repeat	Simple_repeat
_CATATA_n	-0.271196	0.0292935	0.0933854	0.640448	0.143896	0.267284	Simple_repeat	Simple_repeat
LTR67B	-0.0482411	0.897096	0.0849895	0.641693	0.32495	0.000352422	LTR	ERVL
MER74B	0.0974376	0.687017	0.0971938	0.641693	0.161402	0.220349	LTR	ERVL
MER58B	0.0111901	0.996165	-0.105798	0.643371	-0.086363	0.641486	DNA	hAT-Charlie
_CCCCCG_n	0.00599277	1	0.212182	0.646442	0.0413151	0.957183	Simple_repeat	Simple_repeat
L1P4b	-0.195219	0.623237	0.172596	0.646442	0.283921	0.225027	LINE	L1
_GGGAA_n	-0.770175	0.00399809	0.211373	0.64958	-0.420882	0.177275	Simple_repeat	Simple_repeat
LTR81AB	0.183083	0.830287	0.275761	0.64958	0.309028	0.48744	LTR	Gypsy
LTR46	0.170565	0.622234	0.148144	0.651727	0.242369	0.240881	LTR	ERV1
LTR16C	-0.11596	0.621515	-0.0983563	0.651738	-0.212571	0.0930327	LTR	ERVL
LTR19A	0.224318	0.2214	0.112012	0.651738	0.100467	0.600436	LTR	ERV1
MER75B	0.153269	0.840835	-0.252623	0.656059	0.131571	0.783178	DNA	PiggyBac
L1M	-0.0409518	0.966492	0.141478	0.656059	0.0520608	0.878722	LINE	L1
LTR18B	-0.303879	0.256192	-0.155147	0.663111	-0.393089	0.0440791	LTR	ERVL
LTR54	0.0571382	0.942594	-0.136174	0.663568	0.153938	0.498309	LTR	ERV1
LTR16B1	0.246004	0.0569301	-0.0935481	0.663568	-0.0999292	0.527501	LTR	ERVL
_TTAA_n	-0.245221	0.381943	-0.14973	0.664312	-0.31959	0.106876	Simple_repeat	Simple_repeat
MLT1A-int	-0.0791347	0.8686	-0.120896	0.664312	-0.044675	0.878722	LTR	ERVL-MaLR
_TATTG_n	0.592117	0.539763	0.463237	0.664312	-0.00321022	1	Simple_repeat	Simple_repeat
_CTCGG_n	-1.58253	0.00051963	-0.364429	0.664783	-1.11204	0.022395	Simple_repeat	Simple_repeat
_TCTG_n	-0.315208	0.17136	-0.140514	0.664783	0.230273	0.254253	Simple_repeat	Simple_repeat
L1MA2	-0.0271152	0.986367	0.142557	0.664783	0.129587	0.606366	LINE	L1
L1MCa	-0.0482802	0.936158	-0.10504	0.664783	0.0459637	0.847748	LINE	L1
tRNA-Thr-ACA	-0.328808	0.961246	-1.07988	0.667513	1.01048	0.47137	tRNA	tRNA
MER66C	-0.0292676	0.986367	-0.166668	0.669129	-0.0653829	0.868257	LTR	ERV1
7SLRNA	0.242617	0.350294	0.135191	0.669129	1.90245	6.37597e-45	srpRNA	srpRNA
_GGA_n	-0.0325496	0.966492	-0.110023	0.669129	-0.297697	0.0319013	Simple_repeat	Simple_repeat
LTR16D	-0.16336	0.555567	-0.12222	0.669129	-0.22292	0.199617	LTR	ERVL
Eulor9B	1.14431	0.174643	0.562162	0.669129	0.534175	0.585748	DNA	DNA
U2	0.027335	0.968053	-0.105913	0.671255	-0.0352091	0.90016	snRNA	snRNA
LTR72	0.33192	0.303052	-0.186824	0.671255	0.0369015	0.957183	LTR	ERV1
MER72	0.0140627	0.993792	0.120988	0.671255	0.251929	0.121515	LTR	ERV1
Eulor12	-0.564824	0.503837	-0.394722	0.672382	-1.01201	0.0656351	DNA?	DNA?
UCON14	-0.630354	9.19806e-06	-0.123931	0.674718	-0.597364	1.90025e-05	DNA?	DNA?
Eulor6A	-0.636204	0.536666	-0.465224	0.674718	-1.3078	0.0481193	DNA?	DNA?
LTR66	0.0691976	0.964463	0.223891	0.674718	0.277313	0.458125	LTR	ERVL
tRNA-SeC_e_-TGA	-2.0545	0.550181	-1.53675	0.677395	-0.705962	0.814558	tRNA	tRNA
_CGGGGG_n	-0.0758119	0.961246	-0.209835	0.677395	-1.10929	1.20178e-05	Simple_repeat	Simple_repeat
Merlin1_HS	-0.290682	0.459295	0.186142	0.677395	-0.194482	0.572671	DNA	Merlin
L1MD	-0.0532555	0.915167	-0.0975908	0.677725	-0.118825	0.482171	LINE	L1
Charlie25	0.00754511	1	0.122891	0.679143	0.145607	0.499404	DNA	hAT-Charlie
HERVL40-int	0.0805968	0.790189	0.0934944	0.680863	-0.154456	0.279236	LTR	ERVL
MER65B	0.142908	0.808869	0.186862	0.681239	-0.220595	0.524494	LTR	ERV1
L1PA2	-0.129009	0.597929	0.0975343	0.682166	0.0445315	0.847748	LINE	L1
_GATTG_n	-0.670338	0.951185	1.50549	0.682166	0.22989	0.975802	Simple_repeat	Simple_repeat
Kanga1b	0.132659	0.811022	-0.172675	0.682166	0.0167483	0.985477	DNA	TcMar-Tc2
_AAATG_n	-0.345723	0.600527	-0.263604	0.682166	0.0142508	0.993923	Simple_repeat	Simple_repeat
LTR30	-0.190648	0.600527	-0.151135	0.682166	-0.560174	0.003107	LTR	ERV1
LTR43B	-0.0782272	0.944673	0.183587	0.682166	0.48354	0.0370087	LTR	ERV1
Kanga11a	-0.0470885	0.961246	-0.130921	0.682166	-0.341251	0.0511537	DNA	TcMar-Tc2
_CACAC_n	-0.233373	0.445151	-0.143764	0.682166	-0.347017	0.0798694	Simple_repeat	Simple_repeat
X9_LINE	-0.0698299	0.966306	-0.250578	0.682166	-0.557715	0.132395	LINE	L1?
LTR5_Hs	-0.0858605	0.673486	0.0746202	0.682166	0.0956435	0.458125	LTR	ERVK
MLT1J1	-0.00230733	1	-0.0765659	0.682166	0.0927227	0.489269	LTR	ERVL-MaLR
MLT1C	-0.000499746	1	-0.0986469	0.682166	-0.0823745	0.662479	LTR	ERVL-MaLR
_CTTTG_n	0.161493	0.961246	-0.495601	0.682166	-0.360209	0.715463	Simple_repeat	Simple_repeat
tRNA-Ile-ATT	-0.323578	0.303	-0.17319	0.682166	-0.0996708	0.785582	tRNA	tRNA
MER110-int	0.155294	0.760311	-0.172911	0.682166	-0.095564	0.794663	LTR	ERV1
MamGypLTR2b	0.457012	0.170628	0.197796	0.683514	-0.0050635	1	LTR	Gypsy
MER9B	-0.375349	0.242528	-0.177329	0.683514	-0.502632	0.0355894	LTR	ERVK
_CAGAC_n	2.37297	0.420121	1.44999	0.683742	0.741318	0.838946	Simple_repeat	Simple_repeat
MER51D	0.165161	0.743352	0.172837	0.683742	0.552645	0.00824881	LTR	ERV1
MER51-int	0.190173	0.618821	0.149156	0.683742	0.247692	0.29061	LTR	ERV1
tRNA-Gln-CAG	-1.14854	0.012482	-0.324453	0.683742	0.349326	0.514598	tRNA	tRNA
MER92C	-0.128094	0.871878	-0.195029	0.683742	-0.231244	0.515615	LTR	ERV1
tRNA-Pro-CCG	0.683703	0.891115	-1.13339	0.683742	-1.17337	0.577274	tRNA	tRNA
MER96	-0.113532	0.623237	-0.0905107	0.683742	-0.0927922	0.582194	DNA	hAT
tRNA-Ser-TCG	-2.34941	0.673486	-2.34941	0.683742	-2.34941	0.584228	tRNA	tRNA
UCON1	-2.34941	0.673486	-2.34941	0.683742	-2.34941	0.584228	Unknown	Unknown
HSAT6	-2.34941	0.673486	-2.34941	0.683742	-2.34941	0.584228	Satellite	Satellite
_CGAT_n	-2.34941	0.673486	-2.34941	0.683742	-2.34941	0.584228	Simple_repeat	Simple_repeat
MER61F	0.26569	0.582383	-0.209039	0.683742	0.165137	0.680928	LTR	ERV1
LTR13	0.229249	0.0688424	-0.081921	0.683742	-0.0638372	0.698918	LTR	ERVK
tRNA-Arg-CGY_	0.00413812	1	0.7275	0.683742	-0.618754	0.725313	tRNA	tRNA
MER61B	0.15077	0.712037	-0.142309	0.687238	0.0641031	0.854981	LTR	ERV1
MER117	-0.0849167	0.814719	-0.100848	0.687238	-0.226604	0.121073	DNA	hAT-Charlie
tRNA-Gly-GGY	-0.293023	0.936158	-0.649304	0.687238	0.760339	0.458125	tRNA	tRNA
MER61D	-0.0720875	0.951185	-0.171138	0.687238	-0.2057	0.516863	LTR	ERV1
LTR35A	0.290947	0.398652	-0.187399	0.687238	-0.193416	0.582194	LTR	ERV1
_CCTCG_n	0.31184	0.320827	0.167472	0.687238	-0.144015	0.678238	Simple_repeat	Simple_repeat
LTR34	-0.158714	0.717679	-0.148778	0.687238	0.101451	0.750857	LTR	ERV1
HAL1N1_MD	-4.86828	0.10606	-1.45552	0.687674	-1.44667	0.600819	LINE	L1
Charlie11	-0.352067	0.312718	-0.177415	0.691574	-0.316051	0.26313	DNA	hAT-Charlie
Charlie12	0.396915	0.252499	0.191735	0.691574	-0.190156	0.619822	DNA	hAT-Charlie
tRNA-Lys-AAG	-0.181484	0.78288	0.200779	0.693642	0.0740009	0.89941	tRNA	tRNA
LTR88c	-0.017838	0.993729	0.134897	0.693642	0.156208	0.530904	LTR	Gypsy?
MER57A-int	-0.0257635	0.962324	-0.0753418	0.695771	-0.0909402	0.521318	LTR	ERV1
_GCTTG_n	-1.25122	0.681279	-1.08474	0.696476	-0.140385	0.978173	Simple_repeat	Simple_repeat
_CTCTG_n	-0.266071	0.611112	-0.214094	0.696503	-0.394721	0.255329	Simple_repeat	Simple_repeat
MER11D	0.202569	0.459295	0.122035	0.697022	0.126858	0.588195	LTR	ERVK
UCON12	-0.224036	0.8686	-0.337651	0.697022	-0.278702	0.687347	Unknown	Unknown
tRNA-Glu-GAG_	0.156094	0.935854	0.324324	0.697022	0.269062	0.692504	tRNA	tRNA
LTR88a	-0.0851527	0.851465	0.112168	0.701133	-0.161045	0.433541	LTR	Gypsy?
MER44C	0.250256	0.0398109	-0.0796961	0.701133	0.0316431	0.889669	DNA	TcMar-Tigger
HERV-Fc1-int	0.119299	0.907268	0.210034	0.701955	-0.120975	0.818878	LTR	ERV1
U7	0.0821905	0.957408	-0.195342	0.703785	-0.314792	0.347553	snRNA	snRNA
AluSx	-0.0693385	0.90279	-0.10782	0.703785	-0.128456	0.530706	SINE	Alu
tRNA-Met_	0.643783	0.379198	-0.4054	0.703785	-0.15457	0.89215	tRNA	tRNA
L3b	-0.123408	0.696898	-0.103937	0.704172	-0.339422	0.0177075	LINE	CR1
Charlie26a	0.192067	0.670939	0.155809	0.704172	0.187886	0.527501	DNA	hAT-Charlie
FLAM_C	0.0803943	0.830611	-0.0959063	0.704172	-0.0657837	0.76201	SINE	Alu
LTR90B	0.062926	0.961246	0.159029	0.704172	0.0883668	0.818878	LTR	LTR
AluSz6	0.0150024	0.993729	-0.0958235	0.704172	-0.0281453	0.928687	SINE	Alu
LTR53	-0.0391711	0.964156	-0.114486	0.704172	0.000279345	1	LTR	ERVL
MER83C	0.113082	0.925903	0.217839	0.70683	0.170183	0.724434	LTR	ERV1
LOR1b	-0.271755	0.10606	0.0975451	0.70683	0.0714067	0.748514	LTR	ERV1
_CATCG_n	0.0366045	1	-1.11296	0.709233	-1.39095	0.52813	Simple_repeat	Simple_repeat
LTR62	-0.151863	0.71892	0.133338	0.713452	0.0127575	0.988155	LTR	ERVL
MLT1H1	-0.0651134	0.800438	0.0709987	0.713452	-0.00126086	1	LTR	ERVL-MaLR
SVA_D	0.0453558	0.944673	-0.0931901	0.721942	0.0570844	0.795761	Other	Other
L5	-0.0830217	0.90279	-0.127232	0.723585	-0.220022	0.32223	LINE	RTE
Charlie4a	-0.0102647	0.993729	-0.0725556	0.725387	-0.0599879	0.713417	DNA	hAT-Charlie
_CTAAA_n	0.126991	0.966492	-0.431023	0.725387	-0.32398	0.739909	Simple_repeat	Simple_repeat
_CTAGGG_n	-0.00933073	0.999951	-0.0821401	0.725387	-0.0556667	0.772462	Simple_repeat	Simple_repeat
MER41C	0.0243106	0.990017	-0.130333	0.725387	-0.0471147	0.907559	LTR	ERV1
_CGA_n	-0.212295	0.659045	-0.162566	0.726372	-0.400716	0.118774	Simple_repeat	Simple_repeat
MSTB1-int	0.234021	0.760311	0.219569	0.726784	0.676524	0.0321333	LTR	ERVL-MaLR
_TAG_n	-0.175157	0.494689	0.101949	0.727034	-0.0128082	0.984038	Simple_repeat	Simple_repeat
MER124	-0.235699	0.214618	-0.0951191	0.729061	-0.455541	0.00033318	DNA?	DNA?
HERV1_LTRb	0.467531	0.427105	0.27633	0.729061	-0.493639	0.380236	LTR	ERV1
A-rich	-0.240277	0.243353	0.0987569	0.735337	0.056326	0.823234	Low_complexity	Low_complexity
tRNA-Thr-ACY	0.0165594	1	-0.304269	0.735337	-0.869017	0.0886164	tRNA	tRNA
MER105	-0.0241305	0.973043	-0.0844924	0.736626	-0.0114328	0.983067	DNA	DNA
_GAGAA_n	0.0241516	0.995788	0.194361	0.736626	0.596861	0.0257284	Simple_repeat	Simple_repeat
_TCTCC_n	0.666604	0.0114297	0.186654	0.736626	0.275152	0.438481	Simple_repeat	Simple_repeat
tRNA-Leu-TTG	-1.95277	0.236476	-0.745116	0.742408	-0.863588	0.582194	tRNA	tRNA
_TCTCTG_n	-0.0355834	0.961246	-0.0930305	0.746012	-0.0310502	0.920104	Simple_repeat	Simple_repeat
LTR32	-0.120665	0.601133	-0.0816294	0.746931	-0.0648843	0.74048	LTR	ERVL
MER101	0.198059	0.659045	0.147237	0.747776	0.332456	0.174561	LTR	ERV1
MIRb	-0.0577579	0.931423	-0.0970888	0.748722	-0.114316	0.582194	SINE	MIR
_TATAG_n	-0.0650838	0.966492	0.194197	0.748722	-0.223299	0.614357	Simple_repeat	Simple_repeat
Tigger10	-0.200836	0.17136	-0.0733705	0.748722	-0.0264363	0.917116	DNA	TcMar-Tigger
LTR68	-0.0989677	0.892331	0.136572	0.748722	-0.0383152	0.945884	LTR	ERV1
MLT1G3	0.0234356	0.968053	-0.0737137	0.748722	0.00344094	0.999019	LTR	ERVL-MaLR
MER106B	-0.0251965	0.977363	0.0931632	0.748808	-0.0461987	0.865261	DNA	hAT-Charlie
_TTCTCC_n	-0.0479395	0.966492	0.143893	0.748808	-0.41861	0.0749104	Simple_repeat	Simple_repeat
Cheshire	-0.00781169	1	-0.0682866	0.748808	-0.149971	0.202351	DNA	hAT-Charlie
LTR12	0.173616	0.32057	0.0790491	0.748808	0.159168	0.253758	LTR	ERV1
MLT1J2-int	0.255012	0.516608	0.14912	0.748808	0.254274	0.364028	LTR	ERVL-MaLR
MER50C	0.18502	0.78288	0.186625	0.748808	-0.248963	0.540737	LTR	ERV1
AluYb8	0.365421	0.000199867	0.0690318	0.753159	0.0225134	0.926227	SINE	Alu
_GCTG_n	0.110028	0.842167	-0.130302	0.754087	-0.0156894	0.98536	Simple_repeat	Simple_repeat
HERVI-int	-0.0928533	0.743352	0.0790875	0.754087	-0.0099555	0.98536	LTR	ERV1
_A_n	-0.180367	0.591653	-0.112815	0.754087	-0.361368	0.0409994	Simple_repeat	Simple_repeat
_TTCCC_n	-0.0598015	0.975577	-0.215621	0.754087	-0.454162	0.245041	Simple_repeat	Simple_repeat
_TAGA_n	-0.017667	0.986367	-0.0781911	0.754087	-0.0811215	0.648645	Simple_repeat	Simple_repeat
HERV35I-int	-0.18227	0.630904	-0.124664	0.755123	-0.298806	0.169717	LTR	ERV1
LTR19C	-0.0561274	0.966492	-0.16382	0.755123	-0.219024	0.529456	LTR	ERV1
MER52D	0.315525	0.0876741	-0.100938	0.755123	0.117162	0.594975	LTR	ERV1
LTR48	0.120785	0.717679	-0.0975853	0.755123	0.0954404	0.671613	LTR	ERV1
UCON28a	-0.161306	0.877707	0.198847	0.755123	-0.167622	0.738682	Unknown	Unknown
_CACTC_n	0.129471	0.961246	-0.286521	0.755123	-0.172963	0.823076	Simple_repeat	Simple_repeat
GSATII	0.490665	0.0773102	0.153844	0.755123	0.0676749	0.893831	Satellite	centr
LTR24C	0.135818	0.79346	-0.136409	0.755123	-0.0411765	0.938843	LTR	ERV1
LTR75B	0.369472	0.326386	0.176369	0.757132	0.00493805	1	LTR	ERVL
MLT1D	0.00965881	1	-0.0806335	0.761014	-0.00540557	0.993923	LTR	ERVL-MaLR
MLT1E3	0.0327749	0.945989	-0.0626939	0.761788	-0.142936	0.202351	LTR	ERVL-MaLR
tRNA-Gly-GGA	-0.26736	0.553541	-0.165453	0.761788	0.118498	0.771844	tRNA	tRNA
MLT2C1	-0.284233	0.00625417	-0.0644428	0.76324	-0.0286828	0.893831	LTR	ERVL
L1MA7	0.0266033	0.968303	0.0791331	0.768996	0.0818708	0.662479	LINE	L1
MamGypLTR2c	-0.377983	0.290699	-0.15298	0.772836	-0.0209079	0.984038	LTR	Gypsy
tRNA-Asn-AAC	1.11556	0.371664	-0.672061	0.773055	-0.0864797	0.984038	tRNA	tRNA
L1M2	0.0116166	0.996714	-0.0831714	0.773523	-0.0807854	0.692669	LINE	L1
PABL_B-int	-0.0234445	0.988826	-0.109412	0.774259	-0.190283	0.394665	LTR	ERV1
_AACTG_n	-0.267961	0.961246	-0.688708	0.774542	0.116185	0.975802	Simple_repeat	Simple_repeat
Kanga1	0.0743768	0.809229	0.0740005	0.776989	0.168657	0.214126	DNA	TcMar-Tc2
MLT1N2-int	0.17403	0.892567	0.240224	0.777379	0.408366	0.393238	LTR	ERVL-MaLR
MLT1J1-int	-0.136544	0.893623	-0.176251	0.781917	0.120087	0.799106	LTR	ERVL-MaLR
MER4A	0.0661005	0.825469	-0.0672957	0.781917	0.0323429	0.884357	LTR	ERV1
L2c	-0.0710536	0.892331	-0.0867413	0.781917	-0.0652634	0.780622	LINE	L2
_TTTA_n	0.231089	0.17136	0.0789424	0.78195	0.333499	0.00690745	Simple_repeat	Simple_repeat
HERVL18-int	0.421924	0.243353	-0.158708	0.78195	-0.303076	0.347553	LTR	ERVL
MER88	-0.155597	0.869955	-0.189228	0.78195	0.269824	0.509797	LTR	ERVL
SVA_E	0.0407698	0.93711	-0.0698926	0.78195	0.101818	0.516928	Other	Other
Tigger9b	-0.0117897	0.993792	-0.0783232	0.78195	-0.0228784	0.950797	DNA	TcMar-Tigger
tRNA-Arg-AGA	-0.0145283	1	0.412656	0.78195	0.105145	0.960768	tRNA	tRNA
LTR40A1	-0.140145	0.767535	-0.119016	0.783558	-0.459359	0.0210208	LTR	ERVL
_TCGGG_n	-0.0571802	1	-1.14362	0.783758	1.7369	0.230153	Simple_repeat	Simple_repeat
HY1	0.163855	0.659045	-0.110604	0.786599	-0.0157893	0.984038	scRNA	scRNA
_CTACT_n	1.3515	0.465933	0.740099	0.788881	0.221121	0.952796	Simple_repeat	Simple_repeat
MER4B	0.11372	0.570603	0.0648539	0.788881	0.125629	0.34545	LTR	ERV1
L1MEg	0.0415649	0.961246	-0.084929	0.789037	0.043002	0.878722	LINE	L1
MamRep1527	0.0878015	0.838796	0.0913731	0.789037	0.0364637	0.917116	LTR	LTR
_TAAA_n	0.04265	0.966492	0.109617	0.789037	1.07835	5.64105e-13	Simple_repeat	Simple_repeat
5S	-0.263705	0.17136	0.0866409	0.789037	-0.429841	0.00160305	rRNA	rRNA
_CAAAC_n	0.00429641	1	-0.151516	0.789037	-0.65868	0.0090302	Simple_repeat	Simple_repeat
Charlie22a	0.254908	0.0507435	-0.0678264	0.789861	-0.244081	0.0357636	DNA	hAT-Charlie
Eulor4	-4.6485	0.170628	-1.2409	0.789861	-1.22317	0.704452	Unknown	Unknown
_ACGTG_n	-2.4125	0.189574	-0.720349	0.791874	-0.498284	0.807674	Simple_repeat	Simple_repeat
LTR14	0.016999	1	-0.149836	0.791874	-0.0904602	0.84622	LTR	ERVK
Tigger2	0.0538397	0.901462	-0.0676416	0.791874	0.0233246	0.93576	DNA	TcMar-Tigger
_TCC_n	-0.183632	0.440301	0.0831591	0.791874	-0.0197895	0.964122	Simple_repeat	Simple_repeat
MLT1A	0.0354128	0.961246	-0.0738463	0.791874	-0.01623	0.971134	LTR	ERVL-MaLR
AluJo	0.0485417	0.943358	-0.0819931	0.791874	-0.00800463	0.990135	SINE	Alu
MER68	0.0187663	0.977363	0.0600394	0.791874	0.00392728	0.994917	LTR	ERVL
LTR14C	0.414035	0.252499	0.163355	0.791874	0.500849	0.0738722	LTR	ERVK
BSR_Beta	0.297864	0.129059	0.0901453	0.791874	0.266346	0.105066	Satellite	Satellite
HERVK13-int	0.085031	0.897484	0.103986	0.791874	-0.25252	0.221795	LTR	ERVK
U13_	-0.00323073	1	-0.0981359	0.791874	-0.228995	0.244784	snRNA	snRNA
tRNA-Ser-TCY	0.633348	0.537989	-0.40115	0.791874	-0.863755	0.326319	tRNA	tRNA
_AAGTG_n	-1.42266	0.743352	0.942008	0.791874	-1.87968	0.508373	Simple_repeat	Simple_repeat
LTR83	0.150636	0.659045	0.0980309	0.791874	-0.1099	0.662479	LTR	ERVL
_CCCCCT_n	-0.322199	0.425554	-0.145594	0.792398	-0.219598	0.527501	Simple_repeat	Simple_repeat
L2b	-0.0331282	0.966492	0.0811885	0.792398	0.0996295	0.622702	LINE	L2
MSTB	-0.0343566	0.961246	-0.0746801	0.792398	-0.0875908	0.646506	LTR	ERVL-MaLR
Eulor5A	-0.0720574	0.961246	0.157762	0.797902	0.257004	0.484538	DNA?	DNA?
MLT1I	-0.0424165	0.944673	-0.070362	0.797902	-0.0776214	0.675801	LTR	ERVL-MaLR
Ricksha	0.37812	0.317429	-0.157202	0.799998	-0.0594988	0.922671	DNA	MuDR
BC200	-0.323289	0.320451	-0.125817	0.799998	-0.025255	0.975802	scRNA	scRNA
L1M6	0.121749	0.472045	0.0568879	0.801006	0.150505	0.179614	LINE	L1
MER73	0.0257159	0.993729	-0.14372	0.801656	0.3202	0.265432	LTR	ERVL
LTR56	0.219969	0.32057	-0.0866907	0.801656	0.148352	0.462647	LTR	ERV1
LTR64	-0.163163	0.760311	-0.124219	0.801656	-0.157061	0.619613	LTR	ERV1
AmnSINE1	-0.0866924	0.674691	0.0556074	0.803684	0.297328	0.000924456	SINE	Deu
Charlie6	0.0417663	0.961246	-0.090387	0.803684	-0.0909111	0.717735	DNA	hAT-Charlie
_CAAGC_n	-0.0900358	0.999419	-0.646813	0.804184	-0.562089	0.76201	Simple_repeat	Simple_repeat
X1_LINE	-0.338215	0.574634	0.182509	0.804192	-0.435803	0.298675	LINE	CR1
Tigger8	-0.0559719	0.892331	-0.0647233	0.807268	0.0356371	0.875143	DNA	TcMar-Tigger
Tigger13a	0.031265	0.961246	0.0577904	0.808786	-0.11979	0.351176	DNA	TcMar-Tigger
MER89-int	-0.0275915	0.988826	-0.113786	0.808786	-0.0676807	0.861145	LTR	ERV1
LTR88b	0.0605903	0.937081	0.0937923	0.810818	0.199691	0.332996	LTR	Gypsy?
Charlie16a	-0.0669524	0.798427	-0.0566351	0.811469	0.0145199	0.964071	DNA	hAT-Charlie
HERVL74-int	-0.26002	0.129059	-0.0743172	0.811469	-0.598603	2.45211e-07	LTR	ERVL
MER83	0.221912	0.186475	0.0705734	0.811469	0.193747	0.175002	LTR	ERV1
MER125	-0.0911238	0.991163	0.395053	0.811469	0.463437	0.662479	DNA	DNA
ERVL-E-int	0.143152	0.537989	0.0694554	0.813336	0.128079	0.442588	LTR	ERVL
_CTTTA_n	-1.04539	0.79346	-0.895336	0.813336	0.954554	0.648645	Simple_repeat	Simple_repeat
LTR24B	0.298258	0.209453	-0.0986414	0.813336	-0.0788005	0.793891	LTR	ERV1
MIR	-0.0115916	0.999951	-0.0776046	0.814115	-0.0858661	0.692829	SINE	MIR
_ATG_n	-0.232434	0.254235	0.0778989	0.815709	0.0853029	0.698918	Simple_repeat	Simple_repeat
_GGGTG_n	0.175204	0.481678	0.0801183	0.817955	-0.277652	0.0797458	Simple_repeat	Simple_repeat
_CTTG_n	-0.266566	0.429748	0.111175	0.819053	0.0264028	0.971359	Simple_repeat	Simple_repeat
U4	0.171111	0.790189	-0.144347	0.819053	-0.0297982	0.975802	snRNA	snRNA
LTR22	-0.0493538	0.990017	-0.224786	0.819053	-0.0308186	0.985477	LTR	ERVK
_CCCA_n	-0.0503742	0.935854	0.0711191	0.819053	-0.301941	0.0244591	Simple_repeat	Simple_repeat
LTR1C	0.25051	0.543521	0.122776	0.819053	0.337311	0.189087	LTR	ERV1
MER77	-0.496054	9.19806e-06	-0.0654462	0.819053	0.175701	0.20976	LTR	ERVL
HUERS-P2-int	0.0191837	0.999951	0.132657	0.819053	0.285075	0.34246	LTR	ERV1
MLT1F1-int	0.0591287	0.961246	0.123989	0.819053	-0.196187	0.54318	LTR	ERVL-MaLR
_GGTTG_n	0.0355282	1	0.599331	0.819053	0.901288	0.544069	Simple_repeat	Simple_repeat
L1MB5	-0.0373289	0.961246	-0.0764942	0.819053	-0.0831426	0.704452	LINE	L1
LTR71A	0.125277	0.8686	0.128038	0.819053	-0.13053	0.738682	LTR	ERV1
X7D_LINE	0.641807	0.673486	-0.453624	0.819053	0.37648	0.762505	LINE	CR1
L1P3b	-0.0468081	0.966492	0.116322	0.820297	0.216707	0.448482	LINE	L1
MER4D	0.182026	0.292189	0.0638778	0.820297	0.0957064	0.569856	LTR	ERV1
L1PA4	-0.0751778	0.812644	0.0623499	0.826726	0.0223548	0.945345	LINE	L1
MER70A	-0.0882009	0.891855	-0.0939549	0.833989	0.00904268	0.992796	LTR	ERVL
SUBTEL_sa	0.0897929	0.944673	-0.14912	0.834059	-1.69958	4.82512e-08	Satellite	Satellite
L1MEg1	0.230446	0.129882	0.0632932	0.834059	0.296397	0.0124478	LINE	L1
LTR26E	0.180321	0.678942	0.108001	0.834059	0.402734	0.0629698	LTR	ERV1
_CTATT_n	0.699743	0.060705	-0.20235	0.834059	0.54456	0.169018	Simple_repeat	Simple_repeat
MER101B	0.791158	0.00625417	0.160121	0.834059	0.440042	0.202351	LTR	ERV1
MLT1G	-0.00905927	0.995765	0.0514172	0.834059	0.124129	0.296411	LTR	ERVL-MaLR
X7A_LINE	0.0690971	0.915374	-0.0855532	0.834059	-0.193066	0.350085	LINE	CR1
MLT1F2	-0.0218066	0.977363	-0.0613993	0.834059	-0.115426	0.474305	LTR	ERVL-MaLR
Eulor6E	0.545808	0.472134	0.255085	0.834059	0.45617	0.486489	DNA?	DNA?
_CACTT_n	1.24101	0.848733	1.14957	0.834059	1.95354	0.525869	Simple_repeat	Simple_repeat
LTR38B	-0.0298243	0.993263	0.134123	0.834059	0.217265	0.550246	LTR	ERV1
_TTTCC_n	-0.297222	0.381943	-0.111942	0.834059	-0.178039	0.567123	Simple_repeat	Simple_repeat
HERVP71A-int	0.129239	0.791882	-0.100054	0.834059	-0.149644	0.595386	LTR	ERV1
MamGyp-int	-0.118244	0.587877	0.0571721	0.834059	-0.0760391	0.65563	LTR	Gypsy
_CAATT_n	-0.000555862	1	-0.31255	0.834059	0.191886	0.855596	Simple_repeat	Simple_repeat
LTR3	-0.0076993	1	0.107517	0.834059	0.0717712	0.857505	LTR	ERVK
L1PA10	-0.0661116	0.897484	0.0706394	0.834059	0.0463468	0.85986	LINE	L1
LTR78	0.112528	0.578517	0.0550468	0.834059	0.0285757	0.90016	LTR	ERV1
_CAGTT_n	-1.36816	0.737653	-0.930553	0.834059	-0.266789	0.959687	Simple_repeat	Simple_repeat
ORSL	-0.067735	0.915374	0.0815242	0.834059	-0.0226488	0.964071	DNA	hAT-Tip100
AluJb	0.0220033	0.986367	-0.0755436	0.834059	0.0180205	0.972623	SINE	Alu
_CAGCG_n	-0.721519	0.936158	-1.10774	0.834059	0.21635	0.975802	Simple_repeat	Simple_repeat
MER66A	-0.0651352	0.949589	0.0992978	0.834059	-0.014058	0.988155	LTR	ERV1
U6	0.112758	0.582383	0.0550155	0.836951	-0.0353464	0.868007	snRNA	snRNA
L1M3f	-0.302583	0.0124251	-0.0574413	0.837015	-0.127512	0.380236	LINE	L1
tRNA-Arg-CGA	-0.121444	0.993729	0.589917	0.837268	0.0723643	0.990135	tRNA	tRNA
_CTGTG_n	-0.581951	0.031971	-0.123188	0.841678	-0.646759	0.0136679	Simple_repeat	Simple_repeat
MLT1E2-int	-0.200331	0.623237	-0.104885	0.841678	-0.2364	0.380236	LTR	ERVL-MaLR
L1PB1	-0.064944	0.903915	0.0704844	0.841678	0.110602	0.584228	LINE	L1
MER47B	-0.0289902	0.983359	-0.0872938	0.841678	-0.0453562	0.905646	DNA	TcMar-Tigger
FLAM_A	-0.0195154	0.986367	-0.0605546	0.841678	0.00542568	0.993923	SINE	Alu
Cheshire_Mars_	0.111886	0.892567	-0.125527	0.84381	-0.525701	0.0602736	DNA	hAT-Charlie
MER110	-0.028995	0.988826	-0.105115	0.84381	-0.423562	0.06428	LTR	ERV1
MLT1A1	0.0469729	0.923095	-0.0561989	0.84381	-0.0824091	0.619822	LTR	ERVL-MaLR
LTR80A	0.578468	0.0303664	0.125041	0.84381	0.16721	0.661112	LTR	ERVL
AluSg7	-0.0308127	0.966492	-0.0636154	0.844149	-0.0216569	0.954198	SINE	Alu
L1MD3	0.0842583	0.782526	-0.0582166	0.844452	-0.00492459	0.994109	LINE	L1
MER47C	0.0674823	0.911928	0.0759177	0.844967	-0.0741041	0.773173	DNA	TcMar-Tigger
_GGAA_n	0.00256495	1	0.0655456	0.846492	0.251195	0.0774159	Simple_repeat	Simple_repeat
Charlie24	0.0401275	0.941185	0.0545113	0.846492	0.0404274	0.84622	DNA	hAT-Charlie
_AGTAG_n	0.688812	0.0303664	-0.161098	0.847603	-0.345741	0.440844	Simple_repeat	Simple_repeat
PRIMA41-int	0.146407	0.673486	-0.0791016	0.850296	-0.0561882	0.858896	LTR	ERV1
_TTGG_n	-0.0478869	0.966492	0.100828	0.850296	0.0460136	0.925602	Simple_repeat	Simple_repeat
MER112	-0.073886	0.83268	0.0572661	0.850296	-0.0169456	0.965147	DNA	hAT-Charlie
MER44B	0.150383	0.379198	-0.0512934	0.850296	0.012316	0.975802	DNA	TcMar-Tigger
MSTD	-0.0164762	0.990017	0.0574873	0.850296	0.00703654	0.990534	LTR	ERVL-MaLR
_CAGCC_n	0.642366	4.97339e-14	0.051233	0.850296	-0.216743	0.0521245	Simple_repeat	Simple_repeat
_CTATA_n	0.403453	0.459999	-0.179898	0.850296	-0.80671	0.0671141	Simple_repeat	Simple_repeat
_TCCC_n	-0.00628767	1	-0.0569709	0.850296	-0.221094	0.0830015	Simple_repeat	Simple_repeat
U17	-0.607977	0.0712835	-0.136084	0.850296	0.398739	0.190878	snRNA	snRNA
AluYa5	0.0953479	0.784179	0.0646851	0.850296	0.160648	0.345488	SINE	Alu
_CGG_n	-0.00346452	1	-0.063522	0.850296	-0.132775	0.458125	Simple_repeat	Simple_repeat
LTR84a	0.171406	0.571108	0.0759129	0.850296	0.158212	0.47137	LTR	ERVL
_TTCG_n	-2.15175	0.411652	0.63415	0.850296	-1.48365	0.516928	Simple_repeat	Simple_repeat
L1M3c	0.160621	0.570603	0.0722644	0.850296	0.123598	0.560631	LINE	L1
L1MB1	-0.0401714	0.942594	0.0536855	0.850296	0.0792603	0.635864	LINE	L1
THE1D	0.0550594	0.911928	0.0585997	0.850296	0.0869532	0.640991	LTR	ERVL-MaLR
_ATAGG_n	0.91556	0.706311	-0.668239	0.850296	0.786463	0.648645	Simple_repeat	Simple_repeat
Arthur1A	0.160117	0.500278	-0.0637995	0.850296	0.080773	0.699582	DNA	hAT-Tip100
MLT1B-int	0.175563	0.317429	-0.0565995	0.850296	-0.0709563	0.701943	LTR	ERVL-MaLR
ORSL-2a	0.0291839	0.991163	0.10976	0.850296	0.122025	0.7471	DNA	hAT-Tip100
Tigger16a	-0.248321	0.186246	0.0656422	0.850296	0.0725282	0.750857	DNA	TcMar-Tigger
MER34D	0.102575	0.943358	-0.143025	0.850296	0.153388	0.753962	LTR	ERV1
_CCCCG_n	0.0209171	0.986367	-0.0664582	0.852534	-0.121043	0.54318	Simple_repeat	Simple_repeat
HERVL66-int	0.363273	0.306883	0.114735	0.853318	0.0371345	0.960768	LTR	ERVL
_TAAAG_n	-0.290297	0.942594	0.373732	0.854215	0.579367	0.614357	Simple_repeat	Simple_repeat
HERV-Fc1_LTR2	-1.55789	0.79346	-1.09625	0.854318	0.575888	0.898855	LTR	ERV1
AluSp	0.0331098	0.966492	-0.0643958	0.854318	-0.0211822	0.960768	SINE	Alu
AluSg4	0.0737245	0.883568	-0.0648633	0.854318	0.0182105	0.971359	SINE	Alu
AluSz	-0.049046	0.947879	-0.0657217	0.854318	-0.0169952	0.975802	SINE	Alu
_CATCC_n	-0.039934	0.988826	-0.145127	0.854318	0.0326121	0.978173	Simple_repeat	Simple_repeat
tRNA-Ile-ATA	-0.0546224	0.975577	-0.147151	0.854318	-0.52637	0.168948	tRNA	tRNA
MER97c	-0.000845754	1	0.129735	0.854318	-0.399248	0.26313	DNA	hAT-Tip100
LTR84b	0.161957	0.465933	-0.0614654	0.854318	-0.132453	0.463054	LTR	ERVL
L1PA16	-0.0167422	0.9925	0.0626512	0.855346	0.12786	0.505063	LINE	L1
_ATTG_n	0.157498	0.72176	0.0900666	0.855647	0.0899809	0.788226	Simple_repeat	Simple_repeat
Helitron2Na_Mam	-0.272324	0.370229	-0.0882441	0.855984	0.0158362	0.98536	RC	Helitron?
Tigger7	0.0513905	0.893623	0.0470965	0.859283	0.117602	0.376716	DNA	TcMar-Tigger
LTR26B	0.264616	0.634419	0.126116	0.859283	0.170647	0.692829	LTR	ERV1
_TTGTG_n	-0.411878	0.515088	0.159245	0.861449	0.57996	0.105066	Simple_repeat	Simple_repeat
MLT1F2-int	0.194579	0.570603	-0.0831856	0.861754	-0.25095	0.260284	LTR	ERVL-MaLR
MER110A	0.0699769	0.944673	-0.0926825	0.862023	-0.0823933	0.822929	LTR	ERV1
L2a	-0.0549194	0.935556	-0.0631745	0.862023	-0.0337648	0.917116	LINE	L2
MER121	-0.224308	0.611112	-0.100199	0.862023	-0.437013	0.0701116	DNA	TcMar?
MamRep605	0.00883846	1	-0.0491831	0.863512	0.00675737	0.990135	Unknown	Unknown
L1MA5	-0.0373337	0.961246	-0.0632991	0.86366	0.109715	0.593206	LINE	L1
MER57C1	-0.302596	0.0838289	0.0635413	0.865791	-0.0491613	0.85986	LTR	ERV1
MLT1F	-0.0741905	0.815877	-0.051681	0.865791	-0.102897	0.529456	LTR	ERVL-MaLR
SATR2	-0.410556	0.440301	-0.138833	0.867153	-0.0340628	0.978173	Satellite	Satellite
_GGGGA_n	-0.199908	0.659045	0.0941107	0.867153	0.152692	0.626888	Simple_repeat	Simple_repeat
MER76	0.05733	0.935556	-0.0650414	0.868373	0.29117	0.0620691	LTR	ERVL
MamGypLTR1b	-0.900748	8.14921e-18	-0.0542246	0.868373	0.243248	0.0637626	LTR	Gypsy
AluSq4	-0.0104352	0.993729	-0.0449009	0.868373	0.0599962	0.713417	SINE	Alu
MSTC-int	-0.131541	0.892331	0.114223	0.868373	0.0504948	0.945216	LTR	ERVL-MaLR
L1MA4A	-0.123872	0.676298	0.0592276	0.869018	-0.209746	0.182608	LINE	L1
THE1B-int	0.14422	0.516608	0.0527432	0.869018	0.133261	0.398244	LTR	ERVL-MaLR
MER133A	1.1606	0.379198	0.389499	0.869018	0.590843	0.661112	DNA?	DNA?
_CGGG_n	0.476494	0.840566	0.362814	0.869018	0.318536	0.836307	Simple_repeat	Simple_repeat
MLT1A1-int	0.115001	0.814719	0.078789	0.869054	0.26238	0.215716	LTR	ERVL-MaLR
U1	0.0950952	0.936158	0.114278	0.869054	0.24078	0.513199	snRNA	snRNA
_CAGAG_n	0.456597	0.760311	0.28565	0.869054	0.361119	0.736888	Simple_repeat	Simple_repeat
_CCCTA_n	1.41088	0.838796	1.07982	0.869054	0.183685	0.988155	Simple_repeat	Simple_repeat
MER53	0.0734225	0.967343	0.140797	0.871348	1.92285	1.54428e-11	DNA	hAT
MER52A	0.0782288	0.760311	0.0436687	0.872536	0.261134	0.00975651	LTR	ERV1
LTR22C	0.196504	0.380673	0.0616619	0.872536	0.106877	0.611756	LTR	ERVK
L1MC4a	0.0535702	0.921477	0.0541175	0.872859	0.151595	0.346013	LINE	L1
AluSc8	0.0338427	0.966492	0.0592312	0.873347	0.08065	0.719517	SINE	Alu
LTR57-int	-0.0573123	0.961246	0.0807483	0.873453	-0.535677	0.00529874	LTR	ERVL
_CAGG_n	0.02526	0.975577	0.056175	0.873817	-0.347088	0.010404	Simple_repeat	Simple_repeat
MLT1I-int	0.0443635	0.961246	0.0707229	0.873817	0.357887	0.0360383	LTR	ERVL-MaLR
HAL1-2a_MD	-0.150981	0.597929	0.0600539	0.873817	0.301469	0.0445241	LINE	L1
Eulor9A	-0.132621	0.827412	0.0924544	0.873817	-0.309109	0.265432	DNA	DNA
_CATAC_n	0.29447	0.840086	-0.240598	0.873817	0.357841	0.6561	Simple_repeat	Simple_repeat
MLT1K	-0.0875382	0.777307	-0.0503426	0.873817	-0.0669294	0.73401	LTR	ERVL-MaLR
_TTC_n	-0.0568729	0.901462	0.0497957	0.873817	0.0461544	0.83434	Simple_repeat	Simple_repeat
_AATAG_n	0.384232	0.599901	0.176041	0.873817	0.143841	0.857505	Simple_repeat	Simple_repeat
MER1A	0.0475391	0.915167	-0.0453099	0.873817	-0.0231524	0.931054	DNA	hAT-Charlie
AluYc	-0.0147637	0.993729	-0.0539764	0.873817	0.0233407	0.951024	SINE	Alu
AluSc	0.00853751	1	0.0591536	0.873817	0.0240241	0.954198	SINE	Alu
L1P4e	-0.102968	0.90279	0.093158	0.875041	0.698677	0.00045972	LINE	L1
MLT1F1	-0.0321157	0.961246	-0.0479395	0.875041	-0.180398	0.178497	LTR	ERVL-MaLR
LTR65	0.520811	0.00399809	0.0747158	0.875041	0.207387	0.367336	LTR	ERV1
MER46C	0.13804	0.420125	-0.0426345	0.875041	0.1185	0.371831	DNA	TcMar-Tigger
_CCTTG_n	-0.16803	0.767535	-0.0948796	0.875041	-0.155	0.66202	Simple_repeat	Simple_repeat
MLT1A0	-0.0260232	0.968053	-0.0490016	0.875041	-0.0660101	0.736888	LTR	ERVL-MaLR
L1MEf	0.0922965	0.79346	-0.0549241	0.875163	0.0483344	0.848217	LINE	L1
LTR10G	-0.0805335	0.942594	-0.0949424	0.875163	-0.0199239	0.984077	LTR	ERV1
AluSc5	0.0473177	0.951185	0.0578748	0.875289	0.0615693	0.799106	SINE	Alu
LTR1B	-0.200917	0.186475	-0.0454101	0.878411	0.153991	0.24451	LTR	ERV1
MER51E	-0.163633	0.760311	-0.089546	0.881928	-0.0229436	0.978173	LTR	ERV1
LOR1a	-0.1074	0.767535	-0.0584069	0.881944	0.104975	0.624282	LTR	ERV1
_AATTG_n	0.0471803	1	0.290088	0.884522	0.44452	0.691812	Simple_repeat	Simple_repeat
LTR5	-0.299421	0.0122787	-0.0442303	0.885568	-0.0581021	0.753962	LTR	ERVK
MLT1D-int	-0.0710726	0.838796	0.0474378	0.885568	0.0281945	0.919562	LTR	ERVL-MaLR
AluYk11	0.0647246	0.882578	0.0490623	0.88574	0.044084	0.853215	SINE	Alu
UCON8	0.26426	0.636287	-0.117593	0.88574	-0.0191288	0.989466	Unknown	Unknown
L1ME3F	0.0841032	0.78288	0.0464344	0.88574	0.0785828	0.662479	LINE	L1
HERV-Fc1_LTR1	-0.0322367	1	0.328723	0.887142	-0.821279	0.527501	LTR	ERV1
L3	-0.136406	0.587877	-0.0494162	0.888431	-0.10758	0.545532	LINE	CR1
LTR60	0.0951159	0.901462	-0.0801764	0.891723	-0.37326	0.105066	LTR	ERV1
_GCCTG_n	0.281064	0.58317	-0.118716	0.892363	0.154935	0.750857	Simple_repeat	Simple_repeat
LTR77	0.581257	0.036538	0.0953103	0.893797	-0.237771	0.504121	LTR	ERV1
L1MD2	0.0851525	0.777992	0.0447078	0.895171	-0.00995909	0.98517	LINE	L1
Ricksha_b	0.368402	0.299621	0.094917	0.895335	0.26903	0.396506	DNA	MuDR
LTR25	0.0466669	0.966492	-0.080448	0.895352	0.0383587	0.950797	LTR	ERV1
L1MA8	-0.0839438	0.790189	0.0454601	0.895352	-0.00814736	0.988155	LINE	L1
MER87	0.189508	0.620203	-0.0751746	0.895352	-0.00754059	0.994917	LTR	ERV1
LTR42	-0.162496	0.299621	0.0398019	0.895352	0.234391	0.0279789	LTR	ERVL
MER133B	0.0343569	0.993729	0.12711	0.895352	-0.59448	0.167385	DNA?	DNA?
_TCTCG_n	0.469189	0.79346	0.282104	0.895352	0.990517	0.219784	Simple_repeat	Simple_repeat
_ACTTG_n	0.818984	0.961246	1.07196	0.896007	3.20239	0.394665	Simple_repeat	Simple_repeat
Tigger3a	-0.105537	0.743352	0.0498769	0.896007	-0.0668865	0.76201	DNA	TcMar-Tigger
MER91B	-0.0211254	0.973797	-0.039705	0.896574	-0.046904	0.797241	DNA	hAT-Tip100
_CACCAT_n	-0.164845	0.670527	-0.0665266	0.896574	-0.0734658	0.818878	Simple_repeat	Simple_repeat
L1MD1	0.0999303	0.747661	-0.0471369	0.896574	-0.0415519	0.868007	LINE	L1
_CCTAA_n	0.366671	0.966492	-0.692921	0.896574	1.37096	0.544069	Simple_repeat	Simple_repeat
UCON13	-0.63179	0.936158	-0.654566	0.896574	1.25708	0.583405	LINE?	Penelope?
THE1D-int	0.0292126	0.961246	0.0375116	0.896574	0.0559769	0.736888	LTR	ERVL-MaLR
MER67D	0.221172	0.657156	0.0896814	0.896574	0.121444	0.761755	LTR	ERV1
MER90a	0.142695	0.375865	-0.0379429	0.896574	-0.0514853	0.76201	LTR	ERV1
_CAGT_n	0.232548	0.908909	-0.215168	0.896723	0.000590748	1	Simple_repeat	Simple_repeat
LTR45B	0.234898	0.537989	-0.0774214	0.897335	0.163244	0.585739	LTR	ERV1
HERVFH19-int	0.198754	0.661109	0.0779766	0.898221	0.890424	1.35137e-06	LTR	ERV1
LTR38	0.108769	0.901548	0.0868145	0.898221	0.292628	0.313095	LTR	ERV1
UCON25	0.591004	0.936388	0.604873	0.898221	1.52279	0.490139	Unknown	Unknown
_CAAAG_n	-1.08527	0.135634	-0.197132	0.898221	-0.469244	0.552081	Simple_repeat	Simple_repeat
_CAT_n	-0.34791	0.0982146	0.0603819	0.898221	0.0797428	0.77364	Simple_repeat	Simple_repeat
GC_rich	0.129876	0.670524	-0.0509212	0.898221	-0.0636539	0.790132	Low_complexity	Low_complexity
L1ME3C	0.0019868	1	-0.0474124	0.898221	-0.0430556	0.867166	LINE	L1
UCON21	-0.961379	0.936158	0.905703	0.898221	-0.606825	0.920104	DNA?	DNA?
L2	-0.0148916	0.993729	-0.0465618	0.898221	-0.00646112	0.993117	LINE	L2
tRNA-Ala-GCA	-0.864863	0.897096	-0.663203	0.898378	-2.12977	0.458125	tRNA	tRNA
_ACTAG_n	0.314425	0.977363	0.628074	0.900674	1.24659	0.619822	Simple_repeat	Simple_repeat
_AGATG_n	-0.566046	0.254235	-0.120549	0.902536	0.498415	0.196784	Simple_repeat	Simple_repeat
_CCCGG_n	-0.503404	0.802114	-0.276414	0.902536	-0.628415	0.593206	Simple_repeat	Simple_repeat
L1ME1	0.0518666	0.930319	0.0449232	0.902536	0.0972749	0.600371	LINE	L1
MLT2A1	-0.0237015	0.968303	-0.0386448	0.902536	0.0794099	0.62633	LTR	ERVL
_GCGTG_n	0.506144	0.308122	0.133647	0.902536	0.26184	0.634973	Simple_repeat	Simple_repeat
_TATG_n	-0.00123809	1	-0.0447011	0.902536	0.0141542	0.977781	Simple_repeat	Simple_repeat
MER83B-int	-0.0633924	0.961246	0.0884704	0.902536	-0.0268043	0.978173	LTR	ERV1
L1ME3	-0.0809693	0.838797	-0.046403	0.906648	-0.112079	0.556946	LINE	L1
LTR9B	0.090975	0.760311	0.042621	0.906648	0.0037889	0.999329	LTR	ERV1
MER134	0.0639758	0.990017	0.173945	0.906664	0.063796	0.972623	DNA?	DNA?
_TTCGG_n	-1.51664	0.537989	0.402202	0.906664	-0.602582	0.780771	Simple_repeat	Simple_repeat
MER41G	-0.0420745	0.986367	0.0911692	0.907363	-0.0707435	0.905646	LTR	ERV1
MER92A	-0.496039	0.521961	-0.149394	0.907363	-1.15125	0.021841	LTR	ERV1
UCON11	0.32302	0.842656	-0.214003	0.907363	-1.07862	0.179083	Unknown	Unknown
AluYf5	0.144863	0.726092	0.0611314	0.907363	0.126961	0.634973	SINE	Alu
L1MA1	-0.0230946	0.986367	0.0496408	0.90745	0.0896501	0.695659	LINE	L1
MER63D	0.020757	0.979799	-0.0408733	0.907611	-0.0832283	0.648645	DNA	hAT-Blackjack
MIR3	-0.17136	0.492088	0.0465052	0.910641	0.0111821	0.98536	SINE	MIR
LTR43-int	-0.342938	0.317429	0.0752424	0.910683	-0.317639	0.251213	LTR	ERV1
MER39	-0.0229283	0.966492	-0.0327051	0.910683	0.0812797	0.556946	LTR	ERV1
LTR16E1	-0.289312	0.0102311	-0.0350652	0.910683	-0.06492	0.695224	LTR	ERVL
MER130	-0.765567	0.303	0.157889	0.910683	0.22999	0.768953	Unknown?	Unknown?
Tigger3b	0.108313	0.683738	-0.0407986	0.910683	0.0345437	0.89754	DNA	TcMar-Tigger
tRNA-Val-GTG	0.741102	0.623237	0.286176	0.910683	0.229831	0.903081	tRNA	tRNA
MLT1H1-int	-0.0170949	1	0.0852388	0.912836	0.697994	0.00327422	LTR	ERVL-MaLR
AluSq2	-0.0156119	0.993729	-0.0448376	0.914112	-0.010649	0.985477	SINE	Alu
_CATAG_n	-0.799678	0.935556	-0.682205	0.919784	0.749044	0.834088	Simple_repeat	Simple_repeat
L1MA5A	-0.131726	0.427105	-0.0320047	0.919784	-0.224154	0.0291966	LINE	L1
Plat_L3	-0.718645	6.75257e-05	-0.060473	0.920209	-1.42906	1.81239e-19	LINE	CR1
AluY	0.0407358	0.961246	-0.0460395	0.920209	-0.00742676	0.992796	SINE	Alu
LTR44	-0.0364927	0.986367	0.0786195	0.920961	0.612487	0.00944752	LTR	ERV1
LTR85a	0.154083	0.581319	-0.0464294	0.921645	-0.163685	0.39267	LTR	Gypsy?
PABL_B	0.0966554	0.842167	-0.054026	0.921645	-0.0513611	0.884357	LTR	ERV1
_CAAA_n	-0.102617	0.591653	0.0309159	0.921645	-0.0128714	0.971134	Simple_repeat	Simple_repeat
MLT2B2	0.0254899	0.966492	-0.0350954	0.923269	-0.140395	0.309722	LTR	ERVL
MamRep1879	0.10178	0.701721	0.03759	0.924	0.0565232	0.780622	DNA	hAT?
L1MC1	0.00133641	1	-0.0366816	0.924001	-0.011287	0.982899	LINE	L1
MER94	-0.0440269	0.925159	-0.033314	0.924189	-0.146275	0.253575	DNA	hAT-Blackjack
MER57C2	-0.00204856	1	-0.0699708	0.924665	0.0922013	0.819015	LTR	ERV1
L1M2a1	-0.258842	0.461737	-0.0629516	0.924665	0.0476	0.920104	LINE	L1
LTR11	0.500357	0.51431	0.144914	0.924665	-0.0928917	0.945884	LTR	ERV
Charlie20a	-0.263199	0.186246	-0.0446703	0.924665	-0.682329	7.91663e-08	DNA	hAT-Charlie
Eulor6B	0.165676	0.966492	-0.241876	0.924665	-2.16494	0.0357636	DNA?	DNA?
MER3	-0.153606	0.53165	0.0400369	0.924665	-0.187304	0.226186	DNA	hAT-Charlie
SVA_A	0.00715067	1	-0.0322892	0.924665	0.0965412	0.514598	Other	Other
_GGGA_n	0.087878	0.8686	0.0495607	0.924665	-0.129946	0.583405	Simple_repeat	Simple_repeat
LTR86B2	0.0724212	0.951225	0.0716375	0.924665	-0.163075	0.6561	LTR	ERVL
LTR37B	-0.0739212	0.814719	0.0362479	0.924665	-0.0578615	0.771419	LTR	ERV1
L1MA9	-0.0817238	0.838797	0.0413695	0.9249	-0.0704057	0.758423	LINE	L1
L1M5	0.0480342	0.942594	0.0400587	0.924982	0.149773	0.380236	LINE	L1
MLT1M	-0.0506822	0.892331	0.0303106	0.926272	0.0310847	0.878722	LTR	ERVL-MaLR
AluYf4	0.0480285	0.94253	-0.0397863	0.927057	0.0491597	0.843165	SINE	Alu
L1PA17	0.000892588	1	0.0305381	0.92745	0.0453469	0.794663	LINE	L1
MER63B	0.00767265	1	-0.0294383	0.929066	-0.174608	0.110594	DNA	hAT-Blackjack
_T_n	-0.134632	0.743352	0.0502024	0.929066	-0.14005	0.565099	Simple_repeat	Simple_repeat
L1MB8	0.0371218	0.961246	-0.0360943	0.930857	0.00108558	1	LINE	L1
LTR24	0.125398	0.827412	-0.059998	0.932659	0.106548	0.753962	LTR	ERV1
MER41-int	-0.0382121	0.961246	-0.0416268	0.936737	-0.22414	0.180375	LTR	ERV1
MARNA	-0.0893404	0.790189	0.0364916	0.936933	0.0572761	0.793891	DNA	TcMar-Mariner
AluYd8	-0.0366761	0.977363	-0.0584928	0.936933	0.0714241	0.854378	SINE	Alu
L1PBa	0.104658	0.669277	0.0319702	0.938407	0.11816	0.434466	LINE	L1
LTR90A	-0.158589	0.798427	-0.0675327	0.938407	-0.217261	0.523443	LTR	LTR
HERVK14C-int	0.314524	0.505483	-0.0766643	0.938407	-0.0546483	0.938411	LTR	ERVK
LTR57	-0.0232534	0.986367	-0.0448941	0.939308	0.0391035	0.917116	LTR	ERVL
MER57F	0.171581	0.791882	-0.0721753	0.939308	-0.0160506	0.990135	LTR	ERV1
HUERS-P3-int	0.93886	7.18109e-24	0.0322139	0.939308	-0.208799	0.098636	LTR	ERV1
_TTTAG_n	0.142945	0.977363	0.23187	0.939308	0.448641	0.736888	Simple_repeat	Simple_repeat
LTR16D2	-0.0835132	0.961246	-0.0796444	0.939308	0.138807	0.769933	LTR	ERVL
MSTD-int	0.105582	0.618537	0.0295656	0.940709	-0.244913	0.0276915	LTR	ERVL-MaLR
MLT2D	0.0131152	0.988826	-0.0260146	0.940779	0.0800124	0.544069	LTR	ERVL
L1PA11	-0.0299821	0.966306	0.0326169	0.942286	-0.00011591	1	LINE	L1
MER41E	0.226319	0.597929	0.061548	0.942391	0.260369	0.353244	LTR	ERV1
LTR35	-0.102699	0.880837	-0.0534549	0.944792	-0.318116	0.167385	LTR	ERV1
L1MB4	-0.0397471	0.961246	-0.0363348	0.944793	0.00310564	1	LINE	L1
LTR85c	-0.355038	0.00472295	0.0323926	0.945639	0.420254	0.000120255	LTR	Gypsy?
L1PB4	-0.025913	0.977363	0.0374072	0.945639	-0.124409	0.530464	LINE	L1
MamGypLTR1a	0.169819	0.683738	0.0525644	0.945639	0.124081	0.684048	LTR	Gypsy
L1MA3	0.00430279	1	-0.0364478	0.945639	-0.0135955	0.98218	LINE	L1
MER74C	-0.052987	0.967593	0.0668455	0.945639	0.0245337	0.982899	LTR	ERVL
AluSg	0.000509655	1	-0.0358474	0.945639	0.0101515	0.987584	SINE	Alu
Eulor2A	-0.505882	0.194426	-0.0755354	0.946658	-0.114815	0.822929	DNA?	DNA?
Tigger9a	-0.0593308	0.908909	-0.0352817	0.946675	0.0225641	0.954198	DNA	TcMar-Tigger
UCON15	-0.553294	0.957507	-0.467846	0.94699	0.720136	0.803722	Unknown	Unknown
X7C_LINE	-0.0548869	0.935556	-0.0375339	0.947579	-0.123818	0.54318	LINE	CR1
_CCCGAA_n	-0.0934917	0.935565	0.0665557	0.948347	0.00174001	1	Simple_repeat	Simple_repeat
tRNA-Ala-GCY	0.454524	0.905992	0.268903	0.951293	0.589076	0.717735	tRNA	tRNA
Eulor6D	0.304075	0.678942	-0.0967999	0.952549	-0.127258	0.868007	DNA?	DNA?
MLT1H	-0.0172794	0.991163	-0.0329724	0.952549	-0.0234113	0.951618	LTR	ERVL-MaLR
LTR81A	0.070629	0.899648	-0.0372897	0.952549	0.0105974	0.988155	LTR	Gypsy
_TTTC_n	-0.200575	0.300125	-0.0321233	0.952549	-0.339244	0.00706052	Simple_repeat	Simple_repeat
_TGG_n	-0.146309	0.484777	-0.0293783	0.952549	-0.268824	0.0265018	Simple_repeat	Simple_repeat
tRNA-Leu-CTY	0.0936338	0.969643	-0.120429	0.952549	-0.854633	0.157954	tRNA	tRNA
LTR7Y	0.131041	0.834668	-0.0553138	0.952549	0.22912	0.433541	LTR	ERV1
_TAGGG_n	-3.20518	0.514138	-0.665319	0.952549	-3.20518	0.433875	Simple_repeat	Simple_repeat
UCON20	0.402154	0.935556	0.279363	0.952549	0.788934	0.603733	Unknown	Unknown
LTR69	-0.0319274	0.993729	0.0861332	0.952549	-0.161329	0.783227	LTR	ERVL
L1PB3	0.0410181	0.942594	0.0281186	0.952549	0.0507937	0.793891	LINE	L1
L1MEc	-0.0118781	0.993792	0.0301128	0.95273	0.111202	0.521318	LINE	L1
_CATA_n	-0.0971317	0.703542	-0.0277628	0.95438	0.00442437	0.994917	Simple_repeat	Simple_repeat
_CATGC_n	-0.108304	0.977363	-0.148993	0.954738	0.440722	0.600372	Simple_repeat	Simple_repeat
MER20B	-0.115099	0.657156	0.0292688	0.954738	-0.0441035	0.84622	DNA	hAT-Charlie
MER57B1	-0.354858	0.031971	0.0349381	0.955257	-0.109443	0.605616	LTR	ERV1
L1PA15	-0.0224887	0.984711	0.0323616	0.957217	0.102307	0.603733	LINE	L1
MLT1E2	-0.0985253	0.721502	0.028223	0.958137	-0.0225121	0.945884	LTR	ERVL-MaLR
MER21B	0.152674	0.418608	0.0270316	0.958137	0.176044	0.17826	LTR	ERVL
LTR22A	0.0989247	0.8686	-0.0438323	0.958689	-0.0515652	0.898855	LTR	ERVK
L1MEe	-0.00134893	1	0.0301658	0.959676	-0.0225569	0.95247	LINE	L1
_CGAG_n	0.270713	0.545502	-0.0563692	0.959985	-0.295313	0.336547	Simple_repeat	Simple_repeat
HAL1	0.0350756	0.961246	-0.0292728	0.959985	0.0398541	0.876599	LINE	L1
L1MA6	0.0516255	0.901462	-0.0251164	0.959985	-0.0302702	0.898855	LINE	L1
MER48	0.0572057	0.961246	-0.0484247	0.959985	0.0531743	0.907559	LTR	ERV1
LTR23	0.178452	0.515224	0.0354159	0.96137	0.358932	0.0197731	LTR	ERV1
ORSL-2b	0.032443	0.975577	0.039539	0.96137	-0.155061	0.527501	DNA	hAT-Tip100
MLT2B1	0.129603	0.445151	0.0231663	0.961417	0.0575904	0.725879	LTR	ERVL
THE1C	0.0478805	0.935556	0.0274909	0.962446	0.0619403	0.759177	LTR	ERVL-MaLR
_CATGT_n	-0.303203	0.90279	-0.157431	0.963339	-0.311895	0.794663	Simple_repeat	Simple_repeat
Charlie7	0.0289162	0.961246	0.0230174	0.965146	-0.00472086	0.993923	DNA	hAT-Charlie
MER41B	0.0402521	0.930319	0.0223184	0.965146	0.139271	0.242378	LTR	ERV1
_CCGCG_n	-0.236036	0.961246	-0.193744	0.96554	0.236421	0.897838	Simple_repeat	Simple_repeat
tRNA-Asp-GAY	0.472644	0.743352	0.141355	0.967132	-0.0839589	0.972007	tRNA	tRNA
LTR82B	0.204066	0.500278	-0.037067	0.967132	-0.107238	0.686976	LTR	ERVL
HUERS-P1-int	0.0349234	0.967343	0.0350432	0.967132	-0.0834812	0.756926	LTR	ERV1
L1M3d	0.0185735	0.993729	0.0387517	0.969007	0.394797	0.0303154	LINE	L1
L1MA10	0.00193798	1	-0.0213681	0.969007	-0.052209	0.752381	LINE	L1
MER74A	0.0691127	0.786706	0.0211082	0.971342	-0.00123737	1	LTR	ERVL
L1P4c	0.217285	0.808869	0.0775609	0.972979	-0.438901	0.396506	LINE	L1
MamRep137	0.0238748	0.977363	0.0265035	0.972979	-0.112649	0.536834	DNA	TcMar?
_CCTAT_n	0.243013	0.973044	0.26118	0.972979	0.852313	0.626888	Simple_repeat	Simple_repeat
Charlie4z	-0.0384925	0.961246	-0.0257479	0.972979	-0.0827818	0.675801	DNA	hAT-Charlie
tRNA-Glu-GAA	-0.194647	0.892331	-0.08444	0.972979	-0.250643	0.707094	tRNA	tRNA
_TTCTC_n	-0.177796	0.730718	0.0469286	0.972979	0.0899252	0.822929	Simple_repeat	Simple_repeat
L1MC	0.0540726	0.914921	0.0248175	0.972979	0.0250408	0.937901	LINE	L1
MLT1J2	-0.0202433	0.975577	0.021071	0.972979	0.0130417	0.972623	LTR	ERVL-MaLR
tRNA-Ser-AGY	-0.959897	0.717679	-0.232838	0.972979	0.104996	0.982899	tRNA	tRNA
_CAAAA_n	-0.00116454	1	-0.0281922	0.972979	0.0122762	0.984038	Simple_repeat	Simple_repeat
tRNA-Cys-TGY	0.142176	0.8686	-0.0547083	0.972979	0.0234233	0.984038	tRNA	tRNA
AluSx1	0.0474669	0.951185	-0.0290544	0.972979	0.00981239	0.988155	SINE	Alu
Charlie8	-0.00733419	1	0.0237539	0.972979	-0.00289522	1	DNA	hAT-Charlie
L1ME2	0.0553006	0.925903	0.0270203	0.972979	0.00262491	1	LINE	L1
L1MC4	0.00129751	1	-0.0260705	0.973001	-0.04405	0.862339	LINE	L1
_CAAAT_n	-0.188073	0.993729	-0.35931	0.973535	1.05992	0.678238	Simple_repeat	Simple_repeat
LTR40c	-0.0824759	0.82914	-0.0265736	0.975461	0.434832	0.000440697	LTR	ERVL
Zaphod	0.0377995	0.966492	0.0330168	0.975461	-0.16672	0.481087	DNA	hAT-Tip100
LTR61	-0.000283711	1	0.0418469	0.975461	-0.112985	0.752381	LTR	ERV1
MLT1E1A	0.0337269	0.949589	-0.0194961	0.975635	0.0445473	0.794663	LTR	ERVL-MaLR
_TAATG_n	-0.0350221	1	-0.14753	0.976616	-2.01207	0.064838	Simple_repeat	Simple_repeat
Tigger1	-0.0772026	0.850129	-0.0257312	0.976616	-0.185269	0.24451	DNA	TcMar-Tigger
MER33	0.0285885	0.966492	-0.0236861	0.976616	-0.135118	0.400948	DNA	hAT-Charlie
7SK	-0.322116	0.810152	0.0933923	0.977338	1.31639	0.00756317	RNA	RNA
_CAGAT_n	-0.154857	0.967343	-0.141701	0.977338	-0.424627	0.738682	Simple_repeat	Simple_repeat
AluSx3	0.0360536	0.964728	-0.0265336	0.977338	-0.0155348	0.978009	SINE	Alu
L1PA5	-0.124814	0.622234	0.0236771	0.977338	0.000872976	1	LINE	L1
LTR75_1	0.00367797	1	0.0421947	0.977522	0.0115739	0.992796	LTR	ERV1
_AGCTG_n	0.283003	0.692394	0.0662756	0.9785	-0.639215	0.150114	Simple_repeat	Simple_repeat
tRNA-Pro-CCA	-0.0710741	1	0.318985	0.9785	0.616213	0.840176	tRNA	tRNA
L1ME2z	-0.026035	0.971037	-0.0227612	0.9785	-0.0221769	0.951024	LINE	L1
_TAA_n	0.0821813	0.782526	0.0213058	0.9785	0.00460119	0.994917	Simple_repeat	Simple_repeat
TAR1	-0.15031	0.830611	-0.0432091	0.979195	-0.0918076	0.847748	Satellite	telo
HERVIP10FH-int	0.11611	0.570603	0.0189273	0.979195	0.0388158	0.848217	LTR	ERV1
LTR2	0.0998305	0.716556	0.0215619	0.979195	-0.0378735	0.878118	LTR	ERV1
U5	0.246033	0.601133	0.0487739	0.979195	0.0599382	0.922311	snRNA	snRNA
MER34C_	0.0843576	0.945989	0.0431539	0.979195	0.000834706	1	LTR	ERV1
MER21C	-0.0456165	0.961246	-0.0254189	0.979196	0.30657	0.043553	LTR	ERVL
ALINE	0.646316	0.00320437	0.0415951	0.979196	0.463898	0.0476064	LINE	RTE
L1P5	-0.105709	0.838797	-0.0327255	0.979196	-0.281983	0.179083	LINE	L1
LTR33B	0.134939	0.623237	0.0239972	0.979196	0.169416	0.326319	LTR	ERVL
L4	-0.0450136	0.943358	-0.0219511	0.979196	-0.152468	0.33419	LINE	RTE
_CAAGG_n	0.691107	0.116515	-0.0711455	0.979196	-0.488836	0.392955	Simple_repeat	Simple_repeat
HERVK14-int	0.0901592	0.796446	-0.0237892	0.979196	0.1157	0.544069	LTR	ERVK
L1M2b	-0.264228	0.550473	-0.042529	0.979196	0.193736	0.562705	LINE	L1
L1PA13	-0.0296749	0.966492	0.0222769	0.979196	0.096958	0.606366	LINE	L1
L1ME3A	0.168473	0.379929	-0.0209048	0.979196	0.0886049	0.613436	LINE	L1
LTR18A	0.223078	0.731104	-0.0489111	0.979196	0.176364	0.68818	LTR	ERVL
MLT1G3-int	0.483987	0.253329	0.0546691	0.979196	0.180227	0.706768	LTR	ERVL-MaLR
L1PB	0.056165	0.857844	-0.0180657	0.979196	-0.0490198	0.772156	LINE	L1
L1MA4	-0.0580823	0.911928	0.0220872	0.979585	0.0857158	0.666789	LINE	L1
UCON16	0.183819	0.971037	0.1545	0.980447	1.47462	0.0981008	Unknown	Unknown
_CGGTG_n	0.87721	0.790189	-0.264651	0.980447	2.0169	0.119083	Simple_repeat	Simple_repeat
LTR12F	0.270479	0.105116	-0.0224431	0.980447	-0.18899	0.253575	LTR	ERV1
L1PA7	-0.179808	0.377921	-0.0202072	0.980447	-0.157025	0.313095	LINE	L1
LTR3B_	0.149621	0.815877	0.0388595	0.980447	0.290279	0.332996	LTR	ERVK
LTR13_	0.119206	0.812191	-0.0312141	0.980447	0.198105	0.433875	LTR	ERVK
AluYh9	0.0300105	0.977363	-0.027976	0.980447	0.151853	0.523443	SINE	Alu
MER11A	0.0892928	0.740938	-0.0187593	0.980447	0.0636085	0.73401	LTR	ERVK
Eulor6C	-0.261574	0.988826	0.316467	0.980447	-1.18388	0.7471	DNA?	DNA?
Charlie18a	0.115255	0.596739	-0.0177882	0.980447	0.0533144	0.772462	DNA	hAT-Charlie
tRNA-Lys-AAA	-0.410358	0.484326	0.0545558	0.980447	-0.136709	0.822929	tRNA	tRNA
L1P	-0.0515704	0.966492	0.0376653	0.980447	0.0557363	0.913563	LINE	L1
MER91A	-0.0832348	0.798427	0.0195204	0.982313	0.313772	0.010404	DNA	hAT-Tip100
L1MEb	0.0335151	0.951185	-0.0161872	0.982313	0.0834708	0.569856	LINE	L1
MSTA	0.0323462	0.966492	0.0215568	0.982313	0.0546908	0.823234	LTR	ERVL-MaLR
LTR79	-0.0861021	0.790189	-0.0184345	0.982441	-0.277117	0.0307809	LTR	ERVL
LTR38-int	-0.321901	0.379198	0.0352169	0.982441	-0.275961	0.389719	LTR	ERV1
_CCA_n	-0.178398	0.394693	0.01934	0.982441	-0.144564	0.389763	Simple_repeat	Simple_repeat
MER8	0.163721	0.250944	0.0154229	0.982441	0.104331	0.433541	DNA	TcMar-Tigger
MER103C	-0.0627808	0.90279	-0.0199138	0.982441	-0.120535	0.525795	DNA	hAT-Charlie
MER104	0.00544692	1	0.0145056	0.982441	0.0771438	0.567123	DNA	TcMar-Tc2
_CGGGA_n	0.337239	0.838797	-0.0944264	0.982441	0.430296	0.625432	Simple_repeat	Simple_repeat
L1P4	0.014006	0.988826	0.0146483	0.982441	-0.0634145	0.67789	LINE	L1
MamSINE1	-0.1211	0.452266	0.014273	0.982441	0.0548998	0.716957	SINE	tRNA
_CGCTG_n	-0.650598	0.8686	-0.190042	0.982441	0.416549	0.845467	Simple_repeat	Simple_repeat
_CGAGA_n	0.383091	0.973043	-0.312015	0.982441	0.645688	0.868007	Simple_repeat	Simple_repeat
L1MEa	0.330935	0.309602	-0.0337527	0.982441	0.03556	0.959626	LINE	L1
_CAGGT_n	0.124035	1	0.335165	0.982441	0.200765	0.984038	Simple_repeat	Simple_repeat
MER66D	0.153613	0.76476	0.0303459	0.984196	0.248324	0.347553	LTR	ERV1
MER61A	-0.179602	0.590484	0.0245544	0.984196	-0.0911885	0.750857	LTR	ERV1
HERV-Fc2_LTR	-1.28424	0.88249	0.344966	0.984196	-0.658601	0.905646	LTR	ERV1
_GTATG_n	-3.70735	0.320451	-0.295062	0.984196	-0.311672	0.960768	Simple_repeat	Simple_repeat
MLT2C2	0.14595	0.719121	-0.0257629	0.984196	0.0192572	0.978173	LTR	ERVL
L1MEg2	0.0668863	0.901462	-0.0201132	0.985138	-0.0604911	0.806265	LINE	L1
LTR7B	-0.0541417	0.906391	0.01674	0.985138	0.169068	0.226361	LTR	ERV1
_TCCGG_n	-0.415967	0.51431	-0.0507013	0.985767	-1.12931	0.0067286	Simple_repeat	Simple_repeat
L1MC3	-0.00408001	1	-0.0161653	0.986289	-0.0168633	0.964071	LINE	L1
L1M7	-0.114622	0.600527	0.0144303	0.987135	0.0430052	0.832818	LINE	L1
HUERS-P3b-int	0.251818	0.129882	-0.017661	0.987135	0.0235594	0.951024	LTR	ERV1
LTR16A	-0.156148	0.549047	0.0178814	0.987135	-0.321419	0.022395	LTR	ERVL
MER50B	-0.0103598	1	-0.0268981	0.987135	0.251016	0.313095	LTR	ERV1
_TTCA_n	0.0992554	0.659045	-0.013898	0.987135	-0.092733	0.536618	Simple_repeat	Simple_repeat
_TTG_n	-0.213314	0.0794963	-0.0132706	0.987135	-0.0862877	0.536619	Simple_repeat	Simple_repeat
MLT1H2-int	0.27603	0.370229	-0.0274796	0.987135	-0.169249	0.569856	LTR	ERVL-MaLR
_TG_n	-0.182967	0.417061	0.0181719	0.987135	-0.109367	0.572671	Simple_repeat	Simple_repeat
AluYc5	-0.024752	0.993729	0.0305259	0.987135	0.158253	0.648645	SINE	Alu
Kanga2_a	-0.0251023	0.961246	0.0131145	0.987135	0.0492776	0.759177	DNA	TcMar-Tc2
MER30B	-0.101486	0.885373	0.0253336	0.987404	-0.105164	0.75266	DNA	hAT-Charlie
tRNA-Ala-GCY_	-0.272329	0.991468	-0.283879	0.987404	-1.1902	0.763228	tRNA	tRNA
MER39B	0.00366685	1	-0.0136516	0.987404	0.0353596	0.865261	LTR	ERV1
Zaphod2	-0.2255	0.459294	-0.0228753	0.987404	-0.0596667	0.865261	DNA	hAT-Tip100
_CTTAT_n	-3.72128	0.342471	-0.267994	0.987457	-3.72128	0.289247	Simple_repeat	Simple_repeat
_GAGTG_n	-0.893258	0.380673	0.0781839	0.987457	0.139609	0.920104	Simple_repeat	Simple_repeat
Tigger4	0.117685	0.479049	-0.0119644	0.987499	-0.0241362	0.913213	DNA	TcMar-Tigger
L1M1	-0.077913	0.842167	0.0162325	0.987599	0.0311979	0.919562	LINE	L1
Eulor11	-1.21262	0.623237	0.141266	0.987599	-1.80037	0.282731	DNA	DNA
MSTB2-int	0.241454	0.721502	-0.0417734	0.987599	0.346861	0.394665	LTR	ERVL-MaLR
_CCCTAA_n	-0.258408	0.459295	-0.0253073	0.987709	-0.279493	0.27359	Simple_repeat	Simple_repeat
tRNA-Arg-CGG	0.81782	0.915167	0.233243	0.989288	0.782048	0.823164	tRNA	tRNA
MER70B	-0.0258589	0.988826	-0.0224102	0.989288	0.0475575	0.9123	LTR	ERVL
tRNA-Trp-TGG	0.955438	0.545502	0.107034	0.989288	-0.0753351	0.98536	tRNA	tRNA
Tigger3d	-0.155118	0.673486	0.0204973	0.989288	0.214797	0.307714	DNA	TcMar-Tigger
Eulor2B	-0.251877	0.452266	-0.0226336	0.989288	-0.165754	0.552081	DNA?	DNA?
UCON6	-0.179696	0.671669	0.0228902	0.989288	-0.137955	0.646506	Unknown	Unknown
AluSx4	0.0741395	0.869017	-0.015774	0.989288	0.0609805	0.793891	SINE	Alu
tRNA-Gln-CAA	0.00943876	1	-0.0321023	0.989288	-0.123316	0.794663	tRNA	tRNA
MER30	0.0126566	0.993729	-0.0137311	0.989468	0.0185597	0.960768	DNA	hAT-Charlie
HERVL-int	-0.111886	0.854208	0.0221314	0.989468	0.204206	0.435225	LTR	ERVL
_CAGTC_n	-1.11662	0.587877	-0.110603	0.990024	-1.47117	0.282727	Simple_repeat	Simple_repeat
L1PA15-16	0.0829592	0.790189	0.0133523	0.990024	-0.127557	0.433875	LINE	L1
MLT2B5	0.225221	0.676298	-0.029865	0.990024	0.235967	0.524494	LTR	ERVL
MER5A	-0.0296135	0.966492	0.0145807	0.990024	-0.0319818	0.917116	DNA	hAT-Charlie
MER97a	0.213758	0.79346	-0.0387436	0.990614	0.627571	0.0656351	DNA	hAT-Tip100
tRNA-Asn-AAT	-2.31823	0.673486	0.301518	0.990614	-2.31823	0.585748	tRNA	tRNA
MLT1L	0.0811211	0.82914	0.014193	0.990614	-0.00746271	0.990592	LTR	ERVL-MaLR
LTR33	-0.0399007	0.961246	-0.0132555	0.992447	-0.0290989	0.920104	LTR	ERVL
L1M4b	0.0321343	0.966306	-0.0124405	0.992447	0.0250189	0.943486	LINE	L1
MER113B	0.0691535	0.9042	0.0149068	0.992447	0.00678996	0.993923	DNA	hAT-Charlie
_CAGGC_n	-0.321943	0.452266	-0.026776	0.992447	0.433727	0.105066	Simple_repeat	Simple_repeat
_GAATG_n	-0.526225	0.224319	-0.0295723	0.992447	0.522346	0.115282	Satellite	Satellite
_CACG_n	-0.287854	0.0413138	-0.0117767	0.992447	-0.159618	0.279236	Simple_repeat	Simple_repeat
_TC_n	-0.162982	0.371664	0.0111192	0.992447	-0.103072	0.521318	Simple_repeat	Simple_repeat
SVA_F	0.0508485	0.90279	-0.0105885	0.992447	0.0957031	0.530904	Other	Other
MER2	-0.0104437	1	-0.0133845	0.992447	0.113652	0.533334	DNA	TcMar-Tigger
MER96B	0.0929376	0.678942	-0.0102071	0.992447	-0.0803947	0.598744	DNA	hAT
L1M3b	0.0358208	0.983231	0.0217976	0.992447	0.139056	0.673071	LINE	L1
_CAAGA_n	-0.485793	0.838797	-0.0844135	0.992447	0.470913	0.700757	Simple_repeat	Simple_repeat
_CGTAA_n	1.30195	0.791882	0.22513	0.992447	1.05664	0.759177	Simple_repeat	Simple_repeat
_ATATG_n	0.0216164	1	-0.0598262	0.993719	-1.10288	0.192098	Simple_repeat	Simple_repeat
FRAM	0.132649	0.608535	-0.0120611	0.993719	0.0826889	0.678238	SINE	Alu
_CACTA_n	-0.577529	0.28698	0.0342351	0.993719	-0.217718	0.713417	Simple_repeat	Simple_repeat
_ACTG_n	-0.143019	0.914271	0.0307555	0.993719	0.0801409	0.917116	Simple_repeat	Simple_repeat
_TCTCCC_n	0.0903369	0.8686	-0.0136036	0.99584	-0.0736725	0.796597	Simple_repeat	Simple_repeat
_TTCTG_n	0.507524	0.623237	-0.0478482	0.99584	0.135603	0.917116	Simple_repeat	Simple_repeat
LTR86C	-0.128055	0.8686	-0.0183544	0.99584	-0.0545332	0.920104	LTR	ERVL
_CGAA_n	0.403648	0.8686	-0.0673579	0.99584	-0.137763	0.954198	Simple_repeat	Simple_repeat
MER82	-0.0478683	0.923095	0.00898073	0.99584	0.00816793	0.988155	DNA	TcMar-Tigger
THE1B	0.0138012	0.993729	0.0100926	0.99584	0.00574445	0.993117	LTR	ERVL-MaLR
UCON9	-0.378085	0.901462	0.0680684	0.99584	0.0286478	0.995594	Unknown	Unknown
LTR85b	-0.291755	0.242528	-0.015273	0.99584	-0.688895	1.24037e-05	LTR	Gypsy?
HERVH-int	0.0573856	0.940457	-0.0133506	0.99584	0.28442	0.0911455	LTR	ERV1
LTR76	-0.140467	0.726092	-0.0147877	0.99584	-0.266545	0.191623	LTR	ERV1
MER4E	0.0369243	0.966492	-0.0121642	0.99584	0.183343	0.352677	LTR	ERV1
LTR45C	0.150822	0.814719	-0.0191971	0.99584	0.264063	0.394665	LTR	ERV1
MER102b	-0.00604942	1	0.011166	0.99584	-0.133271	0.458125	DNA	hAT-Charlie
_CGGT_n	-0.937575	0.944673	0.231254	0.99584	-3.15837	0.464857	Simple_repeat	Simple_repeat
L1P1	-0.0356526	0.942594	0.00764903	0.99584	-0.0807761	0.572533	LINE	L1
_TCCCC_n	-0.270336	0.420125	0.0169315	0.99584	-0.157617	0.600371	Simple_repeat	Simple_repeat
L1MC5	0.0417954	0.95003	0.0104559	0.99584	0.0796833	0.676496	LINE	L1
MER5A1	-0.0698648	0.850129	0.010388	0.99584	-0.0644661	0.750027	DNA	hAT-Charlie
MER81	0.109595	0.516519	0.00725244	0.99584	-0.049759	0.750857	DNA	hAT-Blackjack
MER20	0.034457	0.961246	-0.00982186	0.99584	-0.0649355	0.759177	DNA	hAT-Charlie
Charlie1a	0.0752187	0.838796	0.00939086	0.996294	0.0348564	0.898855	DNA	hAT-Charlie
X8_LINE	-0.201307	0.620447	0.0153763	0.996294	0.0310909	0.960768	LINE	CR1
MADE1	0.00980817	0.993729	0.00693221	0.996294	-0.0457459	0.771419	DNA	TcMar-Mariner
LTR12_	0.26098	0.053389	-0.00860143	0.996294	-0.053525	0.790132	LTR	ERV1
_CGTTG_n	-2.34897	0.673486	0.18986	0.997905	-2.34897	0.584228	Simple_repeat	Simple_repeat
L1ME4a	-0.0101089	1	0.00918971	0.998583	0.038025	0.893831	LINE	L1
LTR73	0.0324218	0.993263	-0.0182319	0.999624	0.41489	0.180375	LTR	ERV1
LTR8A	-0.000366136	1	0.00649815	0.999624	-0.0573794	0.707094	LTR	ERV1
_GCATG_n	-0.543797	0.961246	-0.12678	0.999624	-0.114486	0.990135	Simple_repeat	Simple_repeat
polypyrimidine	-0.360169	0.00145889	0.00567789	1	-0.514096	2.66071e-07	Low_complexity	Low_complexity
LTR49-int	0.110056	0.595714	0.00533622	1	0.3421	0.00045972	LTR	ERV1
MER72B	0.0183534	1	0.00703577	1	0.747392	0.00736362	LTR	ERV1
_TGGGGG_n	-0.254937	0.264947	-0.00702455	1	-0.375472	0.0233421	Simple_repeat	Simple_repeat
LTR86B1	-0.251596	0.342568	0.00592322	1	-0.364892	0.0446082	LTR	ERVL
Tigger2a	-0.0489385	0.897484	0.00230368	1	-0.205417	0.0529246	DNA	TcMar-Tigger
tRNA-Pro-CCY	0.0141534	1	0.0115119	1	-0.682416	0.0583869	tRNA	tRNA
MER83A-int	0.301082	0.570603	-0.0143493	1	0.524321	0.0929059	LTR	ERV1
_CAG_n	-0.102376	0.760311	0.00491089	1	-0.212965	0.168909	Simple_repeat	Simple_repeat
Eulor3	0	1	0	1	4.27766	0.21128	DNA?	DNA?
HY3	0.0499316	0.937081	-0.0064773	1	0.191035	0.230153	scRNA	scRNA
LTR49	0.199178	0.379198	-0.00619327	1	0.199554	0.241501	LTR	ERV1
_CTG_n	-0.150168	0.544423	0.00856486	1	-0.17162	0.279364	Simple_repeat	Simple_repeat
_CAGAGA_n	-0.0549456	0.892637	-0.0005772	1	0.138749	0.307714	Simple_repeat	Simple_repeat
HERVK9-int	0.0734537	0.772646	0.000225895	1	-0.11884	0.349395	LTR	ERVK
MSTB1	0.0627634	0.871878	0.000209518	1	0.132487	0.371831	LTR	ERVL-MaLR
_CTCCG_n	0	1	0	1	3.35801	0.375859	Simple_repeat	Simple_repeat
_CATCT_n	-0.260049	0.800438	-0.0119644	1	0.404885	0.433875	Simple_repeat	Simple_repeat
_CACCG_n	0.340183	0.8686	0.0098423	1	0.628981	0.467839	Simple_repeat	Simple_repeat
MER76-int	-0.1537	0.877814	-0.00542625	1	0.281046	0.48275	LTR	ERVL
Charlie7a	-0.115488	0.6052	0.00633119	1	0.106964	0.504121	DNA	hAT-Charlie
Kanga1c	0.00722147	1	-0.00731141	1	-0.12113	0.504513	DNA	TcMar-Tc2
_TTACG_n	-0.290693	0.986367	-0.007022	1	-2.15216	0.505711	Simple_repeat	Simple_repeat
LTR81C	-0.13456	0.855288	0.0147346	1	0.215245	0.524494	LTR	Gypsy
MER90	0.213791	0.249988	-0.00418351	1	0.11705	0.527501	LTR	ERV1
AluYk4	0.0509032	0.911928	-0.00402098	1	0.0848771	0.614357	SINE	Alu
LTR71B	-0.311989	0.431935	-0.00686842	1	-0.171901	0.632851	LTR	ERV1
MER4D1	0.00275195	1	-0.00200834	1	0.07714	0.656681	LTR	ERV1
AluYa8	-0.0511289	0.951225	0.00522269	1	0.103933	0.66672	SINE	Alu
_TGAG_n	-0.0813764	0.916669	0.0125035	1	0.126039	0.666789	Simple_repeat	Simple_repeat
Tigger5	0.101516	0.611112	-0.00342491	1	-0.0610025	0.701379	DNA	TcMar-Tigger
L1PA3	-0.104396	0.703808	0.00367752	1	-0.0720599	0.707094	LINE	L1
X2_LINE	0.484742	0.631835	-0.0336577	1	-0.330438	0.715463	LINE	CR1
_CA_n	-0.214348	0.313527	0.00681338	1	-0.0775775	0.73401	Simple_repeat	Simple_repeat
MER94B	0.0711346	0.935556	-0.00645262	1	-0.103974	0.736888	DNA	hAT-Blackjack
GA-rich	-0.275327	0.141255	-0.00207684	1	-0.0776185	0.739036	Low_complexity	Low_complexity
MER89	0.0339905	0.961246	-0.00265411	1	-0.0628999	0.7471	LTR	ERV1
LTR15	0.022754	0.988826	-0.009615	1	-0.0843647	0.759177	LTR	ERV1
MER2B	-0.089766	0.701721	0.00140514	1	0.0535144	0.759177	DNA	TcMar-Tigger
L1M2a	0.156451	0.667611	-0.000344338	1	0.0850908	0.763228	LINE	L1
_GAAAA_n	-0.0259827	0.971037	0.00238065	1	-0.0609137	0.771419	Simple_repeat	Simple_repeat
HERVK22-int	0.102902	0.737653	-0.00412479	1	-0.0621569	0.774822	LTR	ERVK
L1PB2	0.0668473	0.79346	0.000620973	1	0.046958	0.777119	LINE	L1
MER31-int	0.0136912	0.993729	-0.000730447	1	0.0595133	0.794663	LTR	ERV1
LTR16A2	0.079839	0.790189	-0.00624778	1	-0.0495704	0.804694	LTR	ERVL
tRNA-Ala-GCG	0.76625	0.760311	0.0304914	1	0.449971	0.821869	tRNA	tRNA
MER6	-0.101157	0.667611	-0.00260465	1	-0.0423287	0.83434	DNA	TcMar-Tigger
MIRc	-0.102897	0.760311	-0.00277874	1	0.0517663	0.835677	SINE	MIR
CR1_Mam	0.0341102	0.944673	0.000871794	1	-0.0367206	0.839885	LINE	CR1
_CTATG_n	-0.180837	0.971037	-0.0371053	1	0.281637	0.868007	Simple_repeat	Simple_repeat
AluYb9	0.0655307	0.915374	0.00870793	1	-0.0420145	0.90016	SINE	Alu
MLT1J	-0.0601002	0.892331	0.00305997	1	-0.0323242	0.90016	LTR	ERVL-MaLR
PABL_A	0.124545	0.715059	0.00196148	1	0.0408866	0.90016	LTR	ERV1
MLT-int	-0.25193	0.11079	0.00554901	1	0.0328872	0.905646	LTR	ERVL-MaLR
Charlie5	0.0484752	0.889559	0.000203029	1	0.0237124	0.914198	DNA	hAT-Charlie
SATR1	0.121461	0.90279	0.00989396	1	-0.0630407	0.917116	Satellite	Satellite
LTR19-int	0.246499	0.492088	-0.00666579	1	0.0489288	0.917874	LTR	ERV1
L1MEd	0.0563931	0.915374	-0.00281226	1	0.0298931	0.920104	LINE	L1
LTR47B	-0.163492	0.659045	-0.00548486	1	-0.038693	0.925602	LTR	ERVL
Tigger2b	0.478018	0.571516	-0.0142031	1	0.100025	0.937244	DNA	TcMar-Tigger
L1ME3B	0.0619211	0.90279	-0.00194772	1	0.0266887	0.938843	LINE	L1
_CAGGG_n	-0.174254	0.622218	0.0101387	1	-0.0346112	0.943486	Simple_repeat	Simple_repeat
L1P4a	-0.0378898	0.966492	0.00276129	1	-0.0308577	0.951024	LINE	L1
AluYg6	0.0370367	0.961246	0.00320682	1	0.0205524	0.960768	SINE	Alu
HERV17-int	0.0853481	0.777992	-0.00607037	1	-0.0170551	0.964071	LTR	ERV1
LTR6B	-0.277589	0.440301	-0.00678808	1	0.0274989	0.971529	LTR	ERV1
L1ME3E	0.0290395	0.966306	0.00607757	1	0.0148841	0.971765	LINE	L1
L1MC2	0.0434697	0.942594	-0.00601562	1	-0.0144202	0.975802	LINE	L1
HERVL32-int	-0.238522	0.717679	-0.00437445	1	-0.0314696	0.978173	LTR	ERVL
L1MB2	0.0659786	0.899648	-0.00063371	1	0.0118771	0.984038	LINE	L1
_GCCTAA_n	-0.104481	0.993729	-0.0392301	1	0.059587	0.992302	Simple_repeat	Simple_repeat
PRIMA4_LTR	-0.199932	0.570603	-0.00827034	1	0.00888897	0.993117	LTR	ERV1
HERVH48-int	0.0501546	0.940601	-0.00156159	1	0.00514337	0.99535	LTR	ERV1
_ATTCG_n	0	1	0	1	0	1	Simple_repeat	Simple_repeat
_ATCTG_n	0	1	0	1	0	1	Simple_repeat	Simple_repeat
_CCGAA_n	0	1	0	1	0	1	Simple_repeat	Simple_repeat
_CCGTA_n	0	1	0	1	0	1	Simple_repeat	Simple_repeat
tRNA-His-CAY	0	1	0	1	0	1	tRNA	tRNA
MLT1B	0.0488761	0.931423	-0.000837827	1	0.00239814	1	LTR	ERVL-MaLR
MLT1M-int	0	1	0	1	0	1	LTR	ERVL-MaLR
Tigger2a_Car	0	1	0	1	0	1	DNA	TcMar-Tigger
_ATCG_n	0	1	0	1	0	1	Simple_repeat	Simple_repeat
_CCTAG_n	0	1	0	1	0	1	Simple_repeat	Simple_repeat
UCON18	0	1	0	1	0	1	Unknown	Unknown
_CTTAG_n	0	1	0	1	0	1	Simple_repeat	Simple_repeat
_ACCG_n	0	1	0	1	0	1	Simple_repeat	Simple_repeat
_CCGG_n	0	1	0	1	0	1	Simple_repeat	Simple_repeat
CheshMITE	0	1	0	1	0	1	DNA	hAT-Charlie
_CAACG_n	0	1	0	1	0	1	Simple_repeat	Simple_repeat
_CTAAG_n	0	1	0	1	0	1	Simple_repeat	Simple_repeat
_CAAGT_n	0	1	0	1	0	1	Simple_repeat	Simple_repeat
tRNA-Leu-CTA	0	1	0	1	0	1	tRNA	tRNA
MamGypLTR3	-0.17901	0.609491	-0.00409414	1	-0.00402534	1	LTR	Gypsy
_TACGG_n	0	1	0	1	0	1	Simple_repeat	Simple_repeat
tRNA-Thr-ACG	0	1	0	1	0	1	tRNA	tRNA
